# Supplementary material for: Association between the composite dietary antioxidant index and chronic kidney disease: evidence from NHANES 2011–2018
Source: Royal Society of Chemistry journal article supplement (doi:10.1039/d3fo01157g), 2023-01-01
Supplement: d3fo01157g1.csv [file d3fo01157g1.csv]

	...1	Year	seqn	sdmvpsu	sdmvstra	age	sex	eth	poverty	edu	BMI	WC	alcohol.user	smoke	Hypertension	bpxsar	bpxdar	DM	CKD	Glu	Alt	Ast	Cr	UA	TG	TC	HDL	LDL	wtsaf2yr.glu	eGFR	UACR	CDAI	UACR2	nhs_wt	age2	BMI3	eGFR3	poverty3
1	1	2011-2012	62161	1	91	22	Male	Non-Hispanic White	3.15	High school or equivalent	23.3	81	never	never	no	111	71	no	0	5.107	19	25	80.44	291.5	0.948	4.34	1.06	2.845	240011.713	119.2067177	3.880597015	-0.26	<30	60002.92825	<60	<25	>=90	>=1.8
2	9	2011-2012	62169	1	92	21	Male	Other Race	0.33	High school or equivalent	20.1	69.6	mild	never	no	125	77	no	0	5.94	19	17	76.91	321.2	0.881	3.41	1.11	1.888	30061.013	123.3685867	5.066666667	-3.58	<30	7515.25325	<60	<25	>=90	<1.3
3	12	2011-2012	62172	2	96	43	Female	Non-Hispanic Black	2.02	High school or equivalent	33.3	120.4	heavy	now	no	103	72	no	0	5.773	17	15	60.11	297.4	1.592	4.37	1.89	1.758	63279.908	123.8989415	5.222929936	-2.67	<30	15819.977	<60	>=30	>=90	>=1.8
4	18	2011-2012	62178	1	95	80	Male	Non-Hispanic White	0.05	High school or equivalent	28.5	112.5	never	never	no	121	72	DM	0	5.829	13	28	89.28	285.5	1.129	5.2	1.22	3.465	26860.795	69.92196832	9.787234043	-1.38	<30	6715.19875	>=60	25-30	60-90	<1.3
5	24	2011-2012	62184	2	95	26	Male	Non-Hispanic Black	3.85	High school or equivalent	22.1	78.6	mild	never	no	121	68	no	0	4.829	17	24	91.05	321.2	0.452	4.81	1.58	3.026	60118.949	115.3525115	9.210526316	-1.87	<30	15029.73725	<60	<25	>=90	>=1.8
6	29	2011-2012	62189	1	94	30	Female	Other Race	3.04	More than high school	22.4	80.2	heavy	never	no	98	52	no	0	4.607	10	15	80.44	398.5	1.027	3.47	1.24	1.758	40923.959	84.93416744	8.780487805	0.11	<30	10230.98975	<60	<25	60-90	>=1.8
7	39	2011-2012	62199	2	92	57	Male	Non-Hispanic White	5	More than high school	28	107.8	mild	former	no	110	65	no	0	5.551	148	178	84.86	356.9	1.106	4.42	0.91	3	282918.103	87.38553512	4.16	7.3	<30	70729.52575	<60	25-30	60-90	>=1.8
8	42	2011-2012	62202	1	102	36	Male	Mexican American	2.83	Less than high school	24.7	97	heavy	never	no	136	48	no	1	5.218	38	31	60.11	398.5	2.055	7.29	1.5	4.862	76738.147	122.8639764	62.14285714	-2.1	>=30	19184.53675	<60	<25	>=90	>=1.8
9	45	2011-2012	62205	1	90	28	Male	Non-Hispanic White	5	More than high school	28.9	106	moderate	never	no	122	87	no	0	5.607	48	68	96.36	523.4	1.456	5.46	1.03	3.75	221217.935	91.88161675	7.243589744	-3.04	<30	55304.48375	<60	25-30	>=90	>=1.8
10	48	2011-2012	62208	2	102	38	Male	Other Race	1.53	More than high school	22.2	82.7	mild	never	no	105	59	no	0	5.051	32	28	68.07	267.7	0.7	5.25	1.19	3.75	77437.783	115.1162249	5.531914894	-3.31	<30	19359.44575	<60	<25	>=90	1.3-1.8
11	54	2011-2012	62214	2	95	22	Female	Non-Hispanic Black	1.41	High school or equivalent	23.8	89	mild	never	no	109	55	no	0	4.996	12	17	71.6	285.5	0.497	3.96	1.4	2.327	60036.61	119.2220808	21.42857143	-2.31	<30	15009.1525	<60	<25	>=90	1.3-1.8
12	57	2011-2012	62217	2	98	77	Female	Mexican American	0.97	Less than high school	30.6	118.6	never	never	yes	131	56	DM	1	9.881	22	27	81.33	249.8	1.208	4.47	1.19	2.741	34289.643	60.25022504	187.4074074	-2.64	>=30	8572.41075	>=60	>=30	60-90	<1.3
13	58	2011-2012	62218	2	102	38	Female	Non-Hispanic Black	4.05	More than high school	45.4	120.3	moderate	now	yes	134	91	no	0	5.662	22	25	56.58	333.1	1.829	7.53	0.93	5.767	93331.473	130.9132409	16.625	0.76	<30	23332.86825	<60	>=30	>=90	>=1.8
14	64	2011-2012	62224	1	93	29	Female	Other Race	2.46	Less than high school	27.2	90.1	never	never	no	99	61	no	0	4.663	22	18	54.81	267.7	1.366	4.47	1.45	2.405	113955.872	122.2449952	7.391304348	-0.89	<30	28488.968	<60	25-30	>=90	>=1.8
15	66	2011-2012	62226	2	93	80	Male	Other Race	3.64	More than high school	28.4	97.2	never	never	yes	124	68	preDM	0	6.162	18	20	94.59	249.8	1.185	3.65	0.96	2.146	28724.637	65.20984966	6.944444444	-3.75	<30	7181.15925	>=60	25-30	60-90	>=1.8
16	68	2011-2012	62228	1	91	50	Male	Non-Hispanic White	3.15	More than high school	43.4	136.1	moderate	never	yes	114	74	DM	0	11.324	39	24	83.1	386.6	2.168	4.73	0.85	2.896	276757.833	94.15625065	4.705882353	2.58	<30	69189.45825	<60	>=30	>=90	>=1.8
17	71	2011-2012	62231	2	102	48	Female	Mexican American	3.92	High school or equivalent	33.2	111	moderate	never	no	114	69	preDM	0	5.495	49	35	46.85	339	1.377	4.71	1.53	2.56	119523.228	112.6359208	4.838709677	3.55	<30	29880.807	<60	>=30	>=90	>=1.8
18	76	2011-2012	62236	1	93	61	Male	Other Race	5	More than high school	23.2	90.8	mild	never	no	136	79	no	0	5.662	25	19	95.47	315.2	1.524	5.3	1.01	3.595	19384.294	73.68738496	2.336448598	-1.19	<30	4846.0735	>=60	<25	60-90	>=1.8
19	79	2011-2012	62239	2	94	22	Female	Other Race	0.09	High school or equivalent	23.3	78.9	heavy	never	no	119	81	no	0	4.996	14	27	56.58	243.9	0.768	3.1	1.09	1.655	88743.231	127.0720402	5.333333333	-4.53	<30	22185.80775	<60	<25	>=90	<1.3
20	90	2011-2012	62250	3	92	34	Male	Mexican American	5	More than high school	25.9	95.1	mild	never	no	110	58	no	0	5.607	19	22	84.86	297.4	1.106	4.5	1.29	2.689	107987.589	102.708606	5.888888889	6.66	<30	26996.89725	<60	25-30	>=90	>=1.8
21	104	2011-2012	62264	1	99	77	Male	Non-Hispanic White	2.72	Less than high school	31.1	112	mild	former	yes	134	61	DM	0	7.216	21	30	74.26	380.7	1.558	4.09	1.42	1.94	121412.225	84.45514883	25.97222222	-1.1	<30	30353.05625	>=60	>=30	60-90	>=1.8
22	105	2011-2012	62265	2	95	52	Male	Non-Hispanic White	1.13	More than high school	31.4	110	heavy	now	no	131	64	DM	1	14.322	27	17	79.56	243.9	2.518	6.47	1.01	4.293	39524.659	97.854327	120.7317073	4.8	>=30	9881.16475	<60	>=30	>=90	<1.3
23	118	2011-2012	62278	1	94	72	Female	Non-Hispanic White	2.51	More than high school	28.3	91.9	former	former	no	120	46	no	0	5.384	16	20	67.18	273.6	1.332	3.47	1.24	1.603	126629.983	78.61913859	5.443037975	1.06	<30	31657.49575	>=60	25-30	60-90	>=1.8
24	122	2011-2012	62282	1	102	57	Female	Non-Hispanic Black	1.7	More than high school	23.7	90	former	never	yes	109	47	DM	0	4.663	12	36	88.4	249.8	0.847	4.97	1.86	2.715	52868.614	72.26679305	13.41463415	6.13	<30	13217.1535	<60	<25	60-90	1.3-1.8
25	128	2011-2012	62288	1	103	29	Male	Non-Hispanic White	2.24	More than high school	20.1	78	former	never	no	120	75	no	0	5.273	28	22	75.14	291.5	0.711	5.02	1.37	3.31	57050.752	117.7469895	6.09375	8.66	<30	14262.688	<60	<25	>=90	>=1.8
26	131	2011-2012	62291	1	92	56	Male	Other Race	5	More than high school	29.9	104.5	moderate	never	yes	118	65	no	0	5.718	22	25	61	273.6	0.61	3.44	1.11	2.043	50671.341	106.1215839	5.569620253	0.57	<30	12667.83525	<60	25-30	>=90	>=1.8
27	135	2011-2012	62295	2	90	69	Female	Other Race	0.79	Less than high school	32.7	103.5	former	never	yes	142	75	preDM	1	6.939	28	37	81.33	553.2	3.229	6.13	1.03	3.62	32721.644	63.73304749	821.7054264	4.54	>=30	8180.411	>=60	>=30	60-90	<1.3
28	148	2011-2012	62308	1	97	78	Female	Non-Hispanic White	2.64	High school or equivalent	24.6	94.9	mild	never	no	111	48	no	1	5.218	20	24	100.78	416.4	1.998	6.08	1.47	3.698	178673.637	46.16676459	10.39370079	0.3	<30	44668.40925	>=60	<25	<60	>=1.8
29	149	2011-2012	62309	3	92	47	Female	Mexican American	0.46	Less than high school	34	100.3	former	never	yes	117	83	DM	1	12.379	28	28	47.74	303.3	1.05	5.59	1.32	3.776	87105.271	112.7345095	58.06451613	-4.71	>=30	21776.31775	<60	>=30	>=90	<1.3
30	156	2011-2012	62316	2	100	39	Male	Other Race	0.81	Less than high school	21.5	80.3	mild	now	no	NA	NA	no	0	4.718	13	19	97.24	315.2	1.005	4.11	0.98	2.664	65442.9	84.11534713	3.649635036	4.88	<30	16360.725	<60	<25	60-90	<1.3
31	157	2011-2012	62317	1	94	46	Male	Non-Hispanic White	0.94	More than high school	27.6	107	mild	former	yes	119	78	DM	0	5.44	15	36	68.07	333.1	1.648	5.69	1.53	3.414	38964.55	108.8254638	20.97087379	2.91	<30	9741.1375	<60	25-30	>=90	<1.3
32	166	2011-2012	62326	1	97	69	Male	Non-Hispanic White	4.3	More than high school	26.4	106.9	mild	never	no	108	68	preDM	0	5.829	26	24	98.12	291.5	1.411	5.43	1.34	3.439	330638.499	67.39085578	6.666666667	6.93	<30	82659.62475	>=60	25-30	60-90	>=1.8
33	172	2011-2012	62332	1	100	22	Male	Non-Hispanic White	1.06	More than high school	32.6	110.7	never	never	no	136	60	preDM	0	6.217	37	31	88.4	475.8	2.01	5.43	1.11	3.388	72015.461	106.3608436	8.831168831	0.08	<30	18003.86525	<60	>=30	>=90	<1.3
34	179	2011-2012	62339	2	100	29	Male	Non-Hispanic White	5	More than high school	29.2	98.2	heavy	former	no	135	69	no	0	5.329	57	30	79.56	392.6	1.423	5.38	1.27	3.465	154120.155	115.0131026	3.5	0.3	<30	38530.03875	<60	25-30	>=90	>=1.8
35	182	2011-2012	62342	1	101	38	Female	Non-Hispanic White	1.85	More than high school	32.9	103.8	moderate	never	yes	112	72	no	0	5.329	24	22	61	291.5	0.994	5.12	1.27	3.388	168216.092	110.7872645	3.602941176	-2.26	<30	42054.023	<60	>=30	>=90	>=1.8
36	189	2011-2012	62349	3	91	23	Female	Non-Hispanic White	1.5	More than high school	38	104	moderate	never	no	109	70	preDM	0	6.495	29	27	68.95	303.3	1.366	3.26	1.14	1.5	254317.868	107.4920544	4.358974359	3.11	<30	63579.467	<60	>=30	>=90	1.3-1.8
37	193	2011-2012	62353	2	91	80	Male	Non-Hispanic White	5	More than high school	27.8	105.4	mild	former	yes	119	38	DM	0	12.323	21	20	87.52	345	0.768	3.1	1.01	1.733	103263.114	71.63334573	10.51546392	-0.47	<30	25815.7785	>=60	25-30	60-90	>=1.8
38	197	2011-2012	62357	1	91	36	Male	Non-Hispanic White	5	More than high school	25.6	93.7	heavy	former	no	110	82	no	0	4.552	27	23	91.05	285.5	1.445	5.25	1.14	3.439	232681.523	93.01458393	3.413173653	3.31	<30	58170.38075	<60	25-30	>=90	>=1.8
39	203	2011-2012	62363	2	102	44	Female	Non-Hispanic White	1.43	Less than high school	25.8	89.7	former	now	no	107	59	no	0	4.94	26	39	52.16	285.5	2.168	5.66	1.16	3.517	305430.442	111.8294964	5.238095238	-5.83	<30	76357.6105	<60	25-30	>=90	1.3-1.8
40	206	2011-2012	62366	1	98	80	Male	Non-Hispanic White	1.65	High school or equivalent	21.7	88.6	mild	never	yes	182	90	DM	1	7.494	12	18	114.04	279.6	0.847	3.36	1.14	1.836	80101.127	52.01579331	3267.567568	2.11	>=30	20025.28175	>=60	<25	<60	1.3-1.8
41	210	2011-2012	62370	1	90	21	Male	Other Race	3.7	More than high school	18.3	67.5	never	never	no	114	73	no	0	5.495	19	21	73.37	243.9	0.926	3.78	1.34	2.017	29001.066	125.7783538	5.238095238	1.93	<30	7250.2665	<60	<25	>=90	>=1.8
42	217	2011-2012	62377	1	95	78	Female	Non-Hispanic White	1.24	Less than high school	24.7	85.2	heavy	now	yes	155	65	DM	1	6.717	16	23	89.28	279.6	1.219	5.15	1.29	3.284	85478.699	53.44448103	10	-2.54	<30	21369.67475	>=60	<25	<60	<1.3
43	218	2011-2012	62378	1	96	68	Female	Other Race	4.66	Less than high school	33.2	97	former	never	yes	123	61	preDM	1	4.441	12	15	203.32	511.5	0.858	3.1	0.85	1.862	29914.468	21.19854076	14.75609756	-1.16	<30	7478.617	>=60	>=30	<60	>=1.8
44	224	2011-2012	62384	1	101	40	Male	Non-Hispanic White	2.31	High school or equivalent	30.5	108.2	mild	never	no	121	78	no	0	5.718	21	31	97.24	368.8	3.884	5.17	1.14	2.25	56917.918	83.5265397	4.166666667	0.66	<30	14229.4795	<60	>=30	60-90	>=1.8
45	226	2011-2012	62386	1	97	35	Male	Other Race	2.51	High school or equivalent	38.4	119.7	moderate	now	yes	114	78	preDM	0	6.217	28	23	78.68	285.5	1.75	8.3	1.22	6.284	47864.837	110.7738343	4.033816425	2.31	<30	11966.20925	<60	>=30	>=90	>=1.8
46	230	2011-2012	62390	2	92	25	Female	Other Race	4.59	More than high school	18.7	69.6	former	never	no	104	69	preDM	0	5.44	15	20	49.5	202.2	0.756	4.76	1.4	3.026	33919.919	130.0101019	10.66666667	-0.69	<30	8479.97975	<60	<25	>=90	>=1.8
47	233	2011-2012	62393	2	98	20	Male	Mexican American	1.53	High school or equivalent	27.1	87.8	heavy	now	no	112	66	no	0	5.218	16	20	78.68	374.7	0.971	3.88	1.16	2.276	88965.348	123.08311	1.728971963	-0.53	<30	22241.337	<60	25-30	>=90	1.3-1.8
48	239	2011-2012	62399	2	98	53	Female	Mexican American	1.63	Less than high school	30.7	94.4	moderate	former	yes	115	79	DM	0	7.549	28	25	46.85	303.3	1.964	7.01	1.55	4.551	55576.405	108.7484702	3.107344633	3.45	<30	13894.10125	<60	>=30	>=90	1.3-1.8
49	251	2011-2012	62411	2	90	51	Female	Non-Hispanic Black	3.21	More than high school	26.3	100.1	former	now	yes	134	62	no	0	5.329	13	22	69.84	315.2	1.231	4.91	0.88	3.465	41374.439	100.2333252	12.63157895	0.3	<30	10343.60975	<60	25-30	>=90	>=1.8
50	253	2011-2012	62413	1	101	65	Male	Non-Hispanic White	1.6	More than high school	40	127.5	moderate	former	yes	136	54	DM	1	3.886	18	27	121.11	553.2	1.908	3.59	1.63	1.086	284159.632	53.74082053	8.727272727	-2.65	<30	71039.908	>=60	>=30	<60	1.3-1.8
51	258	2011-2012	62418	1	101	80	Male	Non-Hispanic White	1.98	Less than high school	23.5	101.9	former	now	yes	164	68	preDM	1	6.217	9	16	253.71	452	2.393	4.45	0.96	2.405	100179.572	19.78148873	319.1489362	-4.24	>=30	25044.893	>=60	<25	<60	>=1.8
52	259	2011-2012	62419	1	95	80	Male	Non-Hispanic White	0.65	High school or equivalent	26.5	102.9	mild	never	yes	145	70	DM	0	5.829	23	26	80.44	356.9	0.734	4.01	1.68	1.991	109609.429	79.31533135	6.704545455	-1.08	<30	27402.35725	>=60	25-30	60-90	<1.3
53	261	2011-2012	62421	3	91	23	Male	Other Race	0	More than high school	24.5	82.4	mild	never	no	105	64	no	0	5.218	33	26	87.52	428.3	1.106	4.47	1.58	2.379	30850.682	106.9074749	2.105263158	7.01	<30	7712.6705	<60	<25	>=90	<1.3
54	264	2011-2012	62424	1	90	20	Male	Other Race	0.9	Less than high school	30.4	106	heavy	never	no	135	75	preDM	0	5.218	15	21	68.95	356.9	1.231	5.35	1.11	3.672	92547.942	129.9411997	3.891402715	-2.04	<30	23136.9855	<60	>=30	>=90	<1.3
55	270	2011-2012	62430	1	92	27	Male	Other Race	2.93	More than high school	37.9	114.2	heavy	former	no	121	79	no	0	5.384	21	23	78.68	446.1	1.073	4.97	1.01	3.465	93007.823	117.1772228	21.41025641	-3.87	<30	23251.95575	<60	>=30	>=90	>=1.8
56	271	2011-2012	62431	1	97	54	Male	Non-Hispanic Black	0.81	Less than high school	18.9	73.7	former	former	yes	100	68	no	0	4.496	14	14	74.26	285.5	0.598	3.72	1.4	2.043	99168.478	114.7524345	5.291479821	2.76	<30	24792.1195	<60	<25	>=90	<1.3
57	284	2011-2012	62444	2	100	23	Female	Non-Hispanic Black	0	More than high school	33.6	97.1	heavy	never	no	114	55	no	0	4.94	16	19	62.76	303.3	1.411	4.34	1.16	2.534	46491.729	138.8330901	2.413793103	8.62	<30	11622.93225	<60	>=30	>=90	<1.3
58	289	2011-2012	62449	2	100	38	Female	Other Race	3.36	Less than high school	26.4	89.1	moderate	never	no	101	48	no	0	5.718	15	22	59.23	249.8	0.734	4.24	1.84	2.069	84900.101	111.8645758	7.818181818	-1.79	<30	21225.02525	<60	25-30	>=90	>=1.8
59	304	2011-2012	62464	1	95	32	Male	Non-Hispanic White	3.21	High school or equivalent	28.2	98.6	mild	never	no	115	67	no	0	5.273	22	22	87.52	404.5	1.377	5.15	1.32	3.207	47407.804	100.3578406	5.2	3.38	<30	11851.951	<60	25-30	>=90	>=1.8
60	305	2011-2012	62465	1	99	44	Female	Non-Hispanic Black	4.21	More than high school	27.8	90.8	mild	never	no	NA	NA	no	0	5.495	10	14	62.76	261.7	1.513	4.71	0.96	3.051	48721.706	119.7918325	7.894736842	-1.33	<30	12180.4265	<60	25-30	>=90	>=1.8
61	307	2011-2012	62467	1	94	65	Male	Non-Hispanic White	2.15	More than high school	25.6	95	mild	never	no	114	73	no	0	5.329	16	18	101.66	374.7	1.084	5.43	1.76	3.181	241479.786	66.40729187	2.344827586	4.71	<30	60369.9465	>=60	25-30	60-90	>=1.8
62	314	2011-2012	62474	1	98	71	Female	Non-Hispanic White	1.13	High school or equivalent	56.3	140.6	former	former	yes	NA	NA	DM	1	7.438	22	22	141.44	666.2	1.885	6.15	1.37	3.931	71309.292	32.18856432	30.21276596	2.4	>=30	17827.323	>=60	>=30	<60	<1.3
63	315	2011-2012	62475	2	97	22	Male	Non-Hispanic White	0.05	High school or equivalent	25.8	85.1	heavy	never	no	109	66	no	0	4.663	17	23	84.86	356.9	0.689	3.54	1.32	1.914	85480.744	111.7418488	2.64573991	-1.45	<30	21370.186	<60	25-30	>=90	<1.3
64	316	2011-2012	62476	3	91	40	Male	Non-Hispanic White	1.29	High school or equivalent	25.8	93.1	mild	never	yes	115	68	no	0	5.44	16	17	79.56	267.7	1.016	4.53	1.14	2.922	56180.859	106.4606351	4.871794872	-5.39	<30	14045.21475	<60	25-30	>=90	<1.3
65	320	2011-2012	62480	1	98	43	Male	Non-Hispanic White	4.12	High school or equivalent	28.5	100	moderate	former	yes	132	94	no	0	6.106	30	25	89.28	368.8	1.908	5.48	1.29	3.31	237881.279	90.6758115	4.831460674	2.68	<30	59470.31975	<60	25-30	>=90	>=1.8
66	321	2011-2012	62481	2	90	39	Female	Other Race	3.13	More than high school	27.7	93.6	moderate	never	no	95	58	no	0	4.885	34	31	54.81	208.2	0.452	3.83	1.19	2.431	68293.94	113.9524253	5.52238806	0.93	<30	17073.485	<60	25-30	>=90	>=1.8
67	334	2011-2012	62494	2	92	28	Male	Other Race	3.67	More than high school	26.8	86.9	mild	now	no	96	71	no	0	5.607	44	26	81.33	315.2	2.077	5.87	1.14	3.776	80346.118	112.7866718	2.75	-1.76	<30	20086.5295	<60	25-30	>=90	>=1.8
68	341	2011-2012	62501	1	101	30	Female	Non-Hispanic White	3.15	More than high school	25.6	83.3	mild	never	no	107	66	no	0	5.551	13	19	58.34	267.7	0.802	3.75	1.32	2.069	152986.435	118.9179044	9.213483146	-1.33	<30	38246.60875	<60	25-30	>=90	>=1.8
69	344	2011-2012	62504	1	100	30	Female	Other Race	0.39	Less than high school	38.9	111.5	former	never	no	111	71	no	0	5.107	13	18	55.69	297.4	1.513	5.35	1.11	3.543	94179.664	120.7519524	5.333333333	-0.41	<30	23544.916	<60	>=30	>=90	<1.3
70	350	2011-2012	62510	1	92	80	Female	Non-Hispanic White	2.64	High school or equivalent	29.8	99.9	mild	former	yes	164	84	preDM	0	5.995	20	22	76.91	458	1.682	4.65	1.37	2.508	189924.635	63.11711297	10.76923077	-2.65	<30	47481.15875	>=60	25-30	60-90	>=1.8
71	352	2011-2012	62512	3	91	39	Male	Other Race	5	More than high school	19.1	81.4	never	never	no	128	82	no	0	4.663	22	26	76.91	321.2	0.711	4.27	1.24	2.689	46098.918	108.7153986	12.75862069	-1.24	<30	11524.7295	<60	<25	>=90	>=1.8
72	355	2011-2012	62515	2	94	42	Female	Other Race	0.01	Less than high school	31.6	96.3	former	never	no	NA	NA	DM	0	7.105	36	33	62.76	380.7	1.445	6.1	1.45	3.982	78965.66	105.3860473	4.429530201	-1.35	<30	19741.415	<60	>=30	>=90	<1.3
73	362	2011-2012	62522	2	94	54	Male	Non-Hispanic White	5	More than high school	31.2	105.4	heavy	now	no	138	70	DM	0	6.883	113	95	77.79	386.6	1.073	6.88	2.4	3.982	52418.587	97.3844968	5.067567568	-4.61	<30	13104.64675	<60	>=30	>=90	>=1.8
74	364	2011-2012	62524	1	93	23	Male	Non-Hispanic White	3.67	More than high school	24	82.3	mild	never	no	111	57	no	0	4.94	21	19	92.82	356.9	0.881	4.4	1.01	2.974	214437.608	99.56648131	6.909871245	4.56	<30	53609.402	<60	<25	>=90	>=1.8
75	379	2011-2012	62539	2	101	60	Male	Non-Hispanic Black	0.92	Less than high school	31.9	103.3	heavy	now	yes	142	85	DM	1	6.439	24	29	111.38	350.9	0.655	3.78	1.68	1.784	28337.574	71.19897132	56.22222222	-1.57	>=30	7084.3935	>=60	>=30	60-90	<1.3
76	391	2011-2012	62551	2	101	37	Female	Non-Hispanic White	5	More than high school	48.2	147.3	never	never	no	130	73	no	0	5.551	18	18	66.3	386.6	0.644	4.47	1.37	2.819	182552.086	102.1548874	15.49180328	-1.34	<30	45638.0215	<60	>=30	>=90	>=1.8
77	396	2011-2012	62556	1	91	31	Female	Other Race	3.78	More than high school	22.4	80	never	never	no	126	71	no	0	5.829	13	21	60.11	226	1.456	5.46	1.14	3.646	42251.498	116.9313647	6.292134831	1.83	<30	10562.8745	<60	<25	>=90	>=1.8
78	405	2011-2012	62565	2	101	23	Male	Other Race	1.84	More than high school	31.7	111.3	mild	never	yes	134	80	no	0	5.107	81	38	66.3	327.1	1.355	4.81	1.03	3.155	30225.313	129.2990459	4.074074074	-0.22	<30	7556.32825	<60	>=30	>=90	>=1.8
79	411	2011-2012	62571	1	91	32	Female	Non-Hispanic White	3.06	More than high school	27.8	92.7	mild	never	no	101	64	no	0	4.774	29	26	60.11	285.5	0.903	4.34	1.47	2.457	185980.329	116.1128451	13.82978723	-2.46	<30	46495.08225	<60	25-30	>=90	>=1.8
80	419	2011-2012	62579	2	96	78	Male	Mexican American	1.08	More than high school	23.8	94.4	mild	former	yes	135	59	no	0	5.162	13	23	94.59	184.4	0.937	5.97	1.37	4.163	26890.982	66.13246366	2.352941176	1.78	<30	6722.7455	>=60	<25	60-90	<1.3
81	425	2011-2012	62585	1	95	80	Female	Non-Hispanic Black	0.98	High school or equivalent	34.3	101.8	never	never	yes	108	59	no	1	4.885	15	24	58.34	279.6	1.468	7.89	1.53	5.689	55463.595	96.4839929	50.42016807	-3.08	>=30	13865.89875	>=60	>=30	>=90	<1.3
82	427	2011-2012	62587	1	101	73	Male	Non-Hispanic White	1.07	More than high school	24.8	98.9	mild	former	no	135	73	preDM	0	6.994	10	24	98.12	297.4	0.802	4.45	1.58	2.508	33552.935	65.52363243	4.403669725	0.67	<30	8388.23375	>=60	<25	60-90	<1.3
83	433	2011-2012	62593	1	91	72	Female	Non-Hispanic White	2.92	More than high school	34.5	115.3	mild	never	yes	109	62	no	0	5.718	19	20	76.02	303.3	1.705	4.78	1.37	2.638	146643.442	67.70539663	14.90196078	0.38	<30	36660.8605	>=60	>=30	60-90	>=1.8
84	436	2011-2012	62596	1	103	52	Female	Other Race	0.65	More than high school	32.5	105.9	never	never	no	108	66	no	0	5.718	25	22	57.46	422.3	1.073	5.56	1.37	3.698	31502.939	102.4028809	7.666666667	0.19	<30	7875.73475	<60	>=30	>=90	<1.3
85	441	2011-2012	62601	2	97	65	Male	Non-Hispanic Black	5	High school or equivalent	26.1	92.6	mild	former	no	131	70	no	1	5.218	10	22	149.4	398.5	1.005	4.11	1.06	2.586	25324.059	48.2006533	11.48471616	0.58	<30	6331.01475	>=60	25-30	<60	>=1.8
86	442	2011-2012	62602	1	95	80	Female	Non-Hispanic White	4.59	More than high school	25.8	92.2	mild	never	no	137	62	preDM	1	5.273	17	23	99.89	368.8	1.332	6.52	1.84	4.06	129486.275	46.01019394	2.472527473	7.25	<30	32371.56875	>=60	25-30	<60	>=1.8
87	456	2011-2012	62616	3	91	37	Female	Other Race	0.69	Less than high school	19.3	75.5	never	never	no	109	73	preDM	0	6.273	15	24	61.88	279.6	0.406	4.03	1.42	2.431	38331.873	111.0413381	15.76271186	-0.8	<30	9582.96825	<60	<25	>=90	<1.3
88	459	2011-2012	62619	2	96	80	Male	Non-Hispanic White	3.21	More than high school	24.9	100.8	mild	now	yes	145	67	no	1	5.94	17	22	75.14	291.5	1.4	3.65	1.47	1.526	61471.851	82.29273289	69.45945946	-2.61	>=30	15367.96275	>=60	<25	60-90	>=1.8
89	472	2011-2012	62632	2	102	29	Male	Other Race	1.08	Less than high school	48.3	154.7	heavy	now	no	110	69	preDM	0	6.772	36	25	91.94	428.3	2.247	5.72	0.78	3.905	30362.785	96.56799306	4.733333333	-3.49	<30	7590.69625	<60	>=30	>=90	<1.3
90	474	2011-2012	62634	2	97	68	Male	Non-Hispanic White	3.06	Less than high school	32.6	117.8	mild	former	no	130	73	preDM	0	6.051	25	28	83.98	362.8	2.461	5.22	1.32	2.767	236705.544	81.91800469	9.769230769	-0.73	<30	59176.386	>=60	>=30	60-90	>=1.8
91	498	2011-2012	62658	1	92	68	Male	Non-Hispanic White	2.3	High school or equivalent	34.5	112.8	mild	former	no	122	69	no	0	5.607	22	26	95.47	309.3	3.997	7.32	1.06	4.422	55980.548	70.15164896	4.452554745	0.67	<30	13995.137	>=60	>=30	60-90	>=1.8
92	501	2011-2012	62661	2	96	35	Male	Non-Hispanic White	3.67	More than high school	21.2	87.8	heavy	now	no	107	71	no	0	5.162	21	22	76.91	327.1	3.263	7.11	1.16	4.448	220617.709	111.8134553	4.843049327	3.92	<30	55154.42725	<60	<25	>=90	>=1.8
93	517	2011-2012	62677	2	102	30	Female	Mexican American	4.76	More than high school	27.3	87	moderate	former	no	93	54	no	0	5.107	14	16	52.16	190.3	0.519	3.62	1.24	2.146	135181.331	123.3862855	8.630136986	-3.58	<30	33795.33275	<60	25-30	>=90	>=1.8
94	518	2011-2012	62678	2	103	68	Male	Other Race	1.79	Less than high school	23.7	92.8	former	now	yes	154	102	preDM	0	6.55	29	33	71.6	321.2	0.869	4.11	1.29	2.431	19566.08	91.3217739	15.29411765	-1.48	<30	4891.52	>=60	<25	>=90	1.3-1.8
95	522	2011-2012	62682	2	91	62	Female	Non-Hispanic White	0.86	High school or equivalent	34.9	120.5	mild	never	yes	129	56	no	0	5.718	32	24	63.65	249.8	2.935	4.89	0.85	2.689	109507.441	90.03771006	10	2.74	<30	27376.86025	>=60	>=30	>=90	<1.3
96	524	2011-2012	62684	1	92	29	Female	Non-Hispanic White	2.1	More than high school	34	115.7	heavy	never	no	NA	NA	preDM	0	6.772	16	18	59.23	362.8	1.061	4.27	1.06	2.715	169369.955	119.1651718	6.544117647	5.38	<30	42342.48875	<60	>=30	>=90	>=1.8
97	531	2011-2012	62691	2	100	31	Male	Non-Hispanic Black	1.79	Less than high school	23.6	80.5	heavy	now	no	108	60	no	0	4.996	20	19	102.54	261.7	0.768	4.11	1.63	2.121	76499.233	96.46367264	3.516483516	-3.1	<30	19124.80825	<60	<25	>=90	1.3-1.8
98	534	2011-2012	62694	2	91	37	Male	Non-Hispanic White	0.86	High school or equivalent	40.1	133.6	heavy	former	no	118	62	no	0	5.495	22	29	92.82	398.5	0.553	4.6	1.19	3.155	47867.141	90.24073799	1.967213115	-1.9	<30	11966.78525	<60	>=30	>=90	<1.3
99	541	2011-2012	62701	2	90	29	Female	Other Race	2.24	More than high school	29.9	101.8	heavy	now	no	90	63	no	0	5.829	11	16	54.81	202.2	1.298	5.46	1.66	3.207	76983.544	122.2449952	4.848484848	0.28	<30	19245.886	<60	25-30	>=90	>=1.8
100	547	2011-2012	62707	1	98	49	Female	Non-Hispanic White	0.97	Less than high school	30.5	105	former	now	no	117	72	no	0	5.551	46	28	57.46	291.5	1.49	6.88	1.6	4.603	60909.734	104.5838028	6.021505376	-4.44	<30	15227.4335	<60	>=30	>=90	<1.3
101	548	2011-2012	62708	3	91	52	Male	Other Race	1.34	High school or equivalent	21.9	81.4	former	former	yes	160	82	no	0	5.94	20	18	57.46	345	1.264	5.17	1.22	3.388	31773.096	111.857811	11.2195122	3.01	<30	7943.274	<60	<25	>=90	1.3-1.8
102	558	2011-2012	62718	1	96	63	Male	Non-Hispanic Black	2.51	More than high school	26.8	100.6	mild	former	no	124	61	no	0	4.663	27	25	86.63	350.9	1.592	5.04	1.19	3.129	14647.415	94.4663484	5.070422535	1.62	<30	3661.85375	>=60	25-30	>=90	>=1.8
103	559	2011-2012	62719	1	96	74	Male	Other Race	4.66	Less than high school	27.6	97.5	former	never	no	114	54	no	0	5.94	31	23	68.95	327.1	0.847	3.88	1.24	2.25	28226.881	88.92139985	5.810810811	-2.11	<30	7056.72025	>=60	25-30	60-90	>=1.8
104	567	2011-2012	62727	1	95	80	Female	Non-Hispanic White	1.65	More than high school	30.8	97.5	former	former	yes	220	66	DM	1	7.327	17	21	108.73	463.9	1.468	5.46	1.68	3.103	95497.756	41.52700617	3284.615385	0.4	>=30	23874.439	>=60	>=30	<60	1.3-1.8
105	572	2011-2012	62732	2	94	71	Female	Mexican American	0.56	Less than high school	38.8	126.9	never	former	yes	133	71	DM	0	5.662	19	20	64.53	297.4	1.456	5.59	1.58	3.336	43804.222	83.12378833	10.75471698	-0.01	<30	10951.0555	>=60	>=30	60-90	<1.3
106	575	2011-2012	62735	1	97	39	Male	Non-Hispanic White	5	High school or equivalent	22.4	84.5	mild	never	no	102	74	no	0	4.885	21	20	95.47	356.9	0.779	4.65	1.14	3.155	298954.586	86.00222308	4.671814672	-5.69	<30	74738.6465	<60	<25	60-90	>=1.8
107	576	2011-2012	62736	2	90	40	Female	Non-Hispanic Black	1.4	More than high school	22.8	87.5	mild	never	no	126	73	preDM	0	5.384	17	21	66.3	232	0.768	4.91	1.76	2.793	48449.721	115.3061551	4.846416382	-2.3	<30	12112.43025	<60	<25	>=90	1.3-1.8
108	577	2011-2012	62737	2	92	58	Male	Other Race	0.7	Less than high school	23.6	82.5	mild	former	no	NA	NA	preDM	1	4.829	30	28	90.17	392.6	3.048	5.35	0.91	3.051	23910.51	80.64122411	38.45	-2.27	>=30	5977.6275	<60	<25	60-90	<1.3
109	584	2011-2012	62744	2	91	37	Male	Other Race	2.6	More than high school	33.9	114.8	moderate	never	yes	129	93	no	0	4.829	33	32	86.63	333.1	0.914	4.71	1.14	3.155	95106.526	98.09077716	4.926829268	-0.52	<30	23776.6315	<60	>=30	>=90	>=1.8
110	603	2011-2012	62763	1	94	29	Male	Non-Hispanic White	5	More than high school	31.8	112	heavy	now	no	128	61	no	0	5.607	36	27	71.6	469.9	0.914	5.87	2.07	3.388	250204.563	120.1029425	4.597701149	5.02	<30	62551.14075	<60	>=30	>=90	>=1.8
111	604	2011-2012	62764	2	93	51	Female	Other Race	0.36	High school or equivalent	48.6	122.5	never	never	yes	142	79	preDM	0	5.607	18	18	66.3	273.6	1.231	6.03	1.34	4.112	51783.344	92.58670494	9.594594595	-1.2	<30	12945.836	<60	>=30	>=90	<1.3
112	611	2011-2012	62771	2	99	30	Male	Non-Hispanic Black	0.75	Less than high school	27.4	92.5	mild	now	no	126	65	no	1	4.552	15	20	101.66	350.9	0.553	2.25	0.78	1.215	76855.076	98.16588001	106.9518717	-1.38	>=30	19213.769	<60	25-30	>=90	<1.3
113	617	2011-2012	62777	2	92	28	Male	Other Race	1.93	More than high school	25.4	92.3	moderate	never	no	126	74	no	0	5.495	21	27	114.04	505.6	0.508	5.56	2.38	2.948	64550.257	74.95046036	9.459459459	-1.25	<30	16137.56425	<60	25-30	60-90	>=1.8
114	627	2011-2012	62787	1	96	21	Female	Other Race	5	More than high school	22.5	73	never	never	no	97	60	no	0	5.218	11	17	63.65	226	0.553	3.65	1.4	1.991	29540.317	120.0895597	7.916666667	-0.31	<30	7385.07925	<60	<25	>=90	>=1.8
115	629	2011-2012	62789	2	101	26	Female	Other Race	2.2	More than high school	31.8	96.2	never	never	yes	106	78	preDM	0	5.495	21	19	59.23	279.6	1.321	4.01	1.27	2.146	38947.473	121.7030881	7.5	-4.28	<30	9736.86825	<60	>=30	>=90	>=1.8
116	632	2011-2012	62792	1	98	52	Female	Non-Hispanic White	1.09	More than high school	42.3	133	moderate	never	yes	117	68	no	0	5.384	14	18	81.33	392.6	1.027	6.26	1.73	4.06	59082.986	71.81703332	3.230769231	-4.67	<30	14770.7465	<60	>=30	60-90	<1.3
117	644	2011-2012	62804	2	95	69	Male	Non-Hispanic White	5	More than high school	30.8	107.8	mild	never	yes	122	72	preDM	0	6.162	28	26	102.54	434.2	1.005	3.52	1.29	1.758	215690.664	63.89498077	6.395348837	2.33	<30	53922.666	>=60	>=30	60-90	>=1.8
118	648	2011-2012	62808	2	96	44	Female	Mexican American	0.78	Less than high school	31.4	100.8	mild	never	no	94	54	DM	0	6.828	16	20	52.16	267.7	1.253	5.17	1.53	3.077	70192.156	111.8294964	7.666666667	3.38	<30	17548.039	<60	>=30	>=90	<1.3
119	649	2011-2012	62809	1	96	51	Female	Non-Hispanic White	0.23	High school or equivalent	21	82.8	heavy	now	no	108	76	no	1	6.051	103	64	43.32	297.4	1.185	5.61	1.73	3.336	60985.315	113.1714578	114.5454545	-1.89	>=30	15246.32875	<60	<25	>=90	<1.3
120	651	2011-2012	62811	2	99	40	Female	Non-Hispanic Black	2.69	More than high school	37	109.2	heavy	never	no	100	58	no	1	5.44	14	17	115.8	410.4	0.858	6.34	1.6	4.344	43702.375	58.7517168	6.296992481	-1.47	<30	10925.59375	<60	>=30	<60	>=1.8
121	654	2011-2012	62814	2	101	72	Male	Non-Hispanic Black	1.7	Less than high school	24.4	89.6	moderate	former	no	132	64	no	0	5.94	15	17	71.6	345	0.994	5.87	1.89	3.517	24822.264	102.6454788	4.186046512	0.55	<30	6205.566	>=60	<25	>=90	1.3-1.8
122	657	2011-2012	62817	2	99	41	Male	Non-Hispanic Black	0.94	High school or equivalent	31.9	112.2	mild	now	yes	113	80	DM	0	12.379	18	21	80.44	309.3	0.542	3.18	1.19	1.733	44621.304	120.5882363	13.72384937	-1.03	<30	11155.326	<60	>=30	>=90	<1.3
123	678	2011-2012	62838	2	99	44	Female	Non-Hispanic Black	1.16	High school or equivalent	22.3	80.2	heavy	now	yes	94	68	no	0	4.774	48	46	66.3	249.8	0.677	5.33	1.84	3.181	53758.079	112.1113248	5.867768595	-4.32	<30	13439.51975	<60	<25	>=90	<1.3
124	680	2011-2012	62840	2	101	60	Male	Non-Hispanic White	1.27	Less than high school	35.8	126.5	former	now	yes	127	42	preDM	0	5.662	11	17	67.18	309.3	0.847	3.03	1.19	1.448	235389.821	99.16383346	6.222222222	-1.42	<30	58847.45525	>=60	>=30	>=90	<1.3
125	689	2011-2012	62849	1	96	40	Female	Non-Hispanic Black	5	More than high school	68.7	163.5	mild	never	yes	120	76	preDM	0	5.94	17	16	65.42	333.1	0.689	4.4	1.27	2.819	41280.809	117.1926593	20.6918239	1.5	<30	10320.20225	<60	>=30	>=90	>=1.8
126	691	2011-2012	62851	2	91	27	Male	Non-Hispanic White	1.39	Less than high school	24	82.9	moderate	now	no	118	63	no	1	4.552	26	30	74.26	440.2	1.558	4.84	1.37	2.741	243482.229	119.9951538	88.8030888	6.03	>=30	60870.55725	<60	<25	>=90	1.3-1.8
127	695	2011-2012	62855	2	91	47	Female	Non-Hispanic White	5	More than high school	38	109.1	former	never	yes	105	73	no	0	5.495	18	17	75.14	368.8	0.937	3.62	1.24	1.94	340966.904	81.85273975	3.490566038	4.1	<30	85241.726	<60	>=30	60-90	>=1.8
128	699	2011-2012	62859	2	95	53	Female	Non-Hispanic Black	1.41	High school or equivalent	34.9	120.1	mild	former	yes	123	81	preDM	0	5.495	33	33	68.95	368.8	0.734	4.91	1.47	3.103	42979.646	100.3689577	21.2244898	1.94	<30	10744.9115	<60	>=30	>=90	1.3-1.8
129	701	2011-2012	62861	1	95	80	Female	Non-Hispanic White	1.88	High school or equivalent	18.4	74.4	former	former	yes	139	73	DM	1	8.715	18	23	61.88	267.7	0.689	5.2	1.97	2.922	145948.082	82.0922902	33.46938776	0.65	>=30	36487.0205	>=60	<25	60-90	>=1.8
130	704	2011-2012	62864	1	94	57	Female	Non-Hispanic White	0.32	More than high school	29.9	103	mild	now	no	127	81	DM	1	5.773	49	39	141.44	398.5	3.963	6.21	1.24	3.155	68200.257	35.51502524	8.666666667	0.4	<30	17050.06425	<60	25-30	<60	<1.3
131	711	2011-2012	62871	2	92	48	Male	Other Race	4.59	More than high school	24.6	96.9	mild	former	yes	137	99	preDM	0	6.217	38	38	72.49	422.3	4.143	5.04	1.5	1.655	32585.915	104.5681004	7.127659574	1.43	<30	8146.47875	<60	<25	>=90	>=1.8
132	716	2011-2012	62876	1	91	74	Female	Non-Hispanic White	3.67	More than high school	33.5	106.6	mild	never	yes	121	69	preDM	0	6.55	18	26	79.56	541.3	2.416	5.92	1.11	3.698	144462.836	63.1904164	3.956043956	-1.84	<30	36115.709	>=60	>=30	60-90	>=1.8
133	732	2011-2012	62892	2	95	50	Male	Non-Hispanic Black	0.79	More than high school	28.5	92.9	former	now	yes	159	83	preDM	0	5.718	20	22	118.46	279.6	0.914	4.42	1.37	2.638	56955.538	70.90216913	6.170212766	1.48	<30	14238.8845	<60	25-30	60-90	<1.3
134	740	2011-2012	62900	2	95	68	Female	Non-Hispanic Black	2.69	High school or equivalent	31.3	94.2	former	never	yes	157	84	DM	0	6.384	18	24	88.4	321.2	2.043	5.59	1.45	3.207	32185.238	66.89297575	6.666666667	0.08	<30	8046.3095	>=60	>=30	60-90	>=1.8
135	756	2011-2012	62916	2	103	22	Male	Mexican American	0.79	More than high school	31.7	108	heavy	never	no	99	75	no	0	4.94	27	30	73.37	261.7	2.281	4.73	1.14	2.56	75427.606	124.8979054	4.140625	4.03	<30	18856.9015	<60	>=30	>=90	<1.3
136	762	2011-2012	62922	3	91	31	Female	Non-Hispanic White	2.57	More than high school	22.7	75.5	heavy	former	no	128	83	no	0	4.33	18	21	84.86	190.3	0.632	4.16	1.86	2.017	200499.08	79.0581787	5.844155844	0.84	<30	50124.77	<60	<25	60-90	>=1.8
137	767	2011-2012	62927	2	91	63	Male	Non-Hispanic White	5	More than high school	30.8	109	never	never	yes	128	77	preDM	0	4.774	23	20	98.12	446.1	1.366	4.01	1.11	2.276	311663.135	70.29193203	4.621848739	-1.19	<30	77915.78375	>=60	>=30	60-90	>=1.8
138	768	2011-2012	62928	2	90	43	Female	Non-Hispanic Black	0.84	Less than high school	33.5	119.4	former	former	no	118	63	DM	0	13.933	14	19	65.42	410.4	1.434	5.95	1.19	4.112	31392.707	114.7488005	22.98507463	0.73	<30	7848.17675	<60	>=30	>=90	<1.3
139	770	2011-2012	62930	1	102	23	Male	Mexican American	0.67	More than high school	31.2	101.9	heavy	never	no	122	68	no	0	5.662	26	28	65.42	309.3	0.847	5.46	1.5	3.569	85579.96	130.0143421	3.263157895	-0.43	<30	21394.99	<60	>=30	>=90	<1.3
140	777	2011-2012	62937	1	99	63	Female	Non-Hispanic Black	1.63	More than high school	37.6	106.1	mild	never	yes	NA	NA	DM	0	7.771	23	22	63.65	321.2	1.581	6	1.24	4.034	38116.495	103.066917	6.962025316	-3.21	<30	9529.12375	>=60	>=30	>=90	1.3-1.8
141	781	2011-2012	62941	2	90	55	Female	Non-Hispanic Black	1.16	More than high school	20.3	76.1	heavy	now	yes	151	94	no	0	4.607	21	33	66.3	327.1	0.519	5.48	3.08	2.172	37598.403	103.7746359	22.90780142	-0.28	<30	9399.60075	<60	<25	>=90	<1.3
142	785	2011-2012	62945	1	96	48	Female	Non-Hispanic Black	4.9	More than high school	28.1	88.3	moderate	never	no	113	71	DM	0	9.992	13	14	68.07	297.4	1.208	4.06	1.22	2.302	42146.719	105.5913298	3.4375	1.48	<30	10536.67975	<60	25-30	>=90	>=1.8
143	788	2011-2012	62948	1	101	79	Male	Non-Hispanic White	5	More than high school	34.8	119.8	former	never	yes	126	67	DM	0	4.552	13	19	78.68	321.2	1.389	3.62	1.11	1.862	114679.227	81.32126438	11.09677419	-3.23	<30	28669.80675	>=60	>=30	60-90	>=1.8
144	795	2011-2012	62955	2	99	31	Female	Non-Hispanic White	5	More than high school	18.3	76.9	never	never	no	96	67	no	0	5.107	21	21	63.65	202.2	0.756	5.09	1.99	2.767	176448.773	111.9432052	17	4.47	<30	44112.19325	<60	<25	>=90	>=1.8
145	822	2011-2012	62982	1	97	66	Female	Non-Hispanic White	1.16	High school or equivalent	33.6	110	mild	former	yes	123	89	DM	1	5.718	33	33	92.82	315.2	1.784	4.19	1.27	2.095	118938.7	55.47771441	31.02564103	1.25	>=30	29734.675	>=60	>=30	<60	<1.3
146	825	2011-2012	62985	1	102	68	Male	Other Race	2.72	More than high school	27.1	101	mild	former	yes	131	82	DM	0	6.495	36	26	76.91	404.5	0.971	3.59	1.29	1.862	19506.952	88.67869	7.368421053	4.42	<30	4876.738	>=60	25-30	60-90	>=1.8
147	837	2011-2012	62997	2	96	60	Male	Non-Hispanic White	0.95	More than high school	36.4	124	mild	never	no	117	69	no	0	5.773	29	25	82.21	356.9	0.96	4.32	1.03	2.845	70342.791	88.911376	9.112903226	-0.46	<30	17585.69775	>=60	>=30	60-90	<1.3
148	844	2011-2012	63004	2	92	38	Female	Other Race	5	More than high school	18.5	66.2	mild	former	no	115	70	no	0	5.218	28	27	54.81	255.8	1.208	6.13	2.15	3.439	30664.293	114.7557153	8.095238095	1.8	<30	7666.07325	<60	<25	>=90	>=1.8
149	850	2011-2012	63010	2	100	78	Female	Non-Hispanic Black	2.37	More than high school	30.1	111.7	former	never	yes	113	47	DM	0	9.992	11	16	76.02	226	1.174	5.28	1.45	3.284	29536.32	74.82804065	16.51162791	-2.13	<30	7384.08	>=60	>=30	60-90	>=1.8
150	852	2011-2012	63012	1	91	65	Male	Non-Hispanic White	4.76	More than high school	26.7	102.3	mild	former	yes	130	75	preDM	0	5.995	17	34	82.21	410.4	1.118	5.02	1.32	3.181	285807.102	85.84274052	3.80952381	0.81	<30	71451.7755	>=60	25-30	60-90	>=1.8
151	862	2011-2012	63022	1	92	49	Male	Non-Hispanic White	3.16	Less than high school	28.9	101.4	former	former	no	125	78	preDM	0	5.94	67	37	93.7	327.1	1.005	5.61	1.34	3.801	181128.893	82.00053611	9.285714286	-2.55	<30	45282.22325	<60	25-30	60-90	>=1.8
152	863	2011-2012	63023	1	91	25	Male	Non-Hispanic White	0.92	More than high school	22.4	77.3	heavy	former	no	120	72	no	0	4.718	19	20	65.42	309.3	0.395	2.95	1.22	1.552	291873.129	128.200512	14.91935484	-1.11	<30	72968.28225	<60	<25	>=90	<1.3
153	870	2011-2012	63030	2	102	21	Male	Mexican American	0.45	Less than high school	25.9	93.7	heavy	never	no	113	71	no	0	4.885	25	24	71.6	463.9	1.005	4.4	1.03	2.896	87846.665	127.0456091	2.37037037	18.13	<30	21961.66625	<60	25-30	>=90	<1.3
154	876	2011-2012	63036	1	93	74	Female	Other Race	0.55	Less than high school	35.3	111.7	never	never	yes	119	75	DM	1	5.773	19	38	114.92	428.3	1.253	3.85	0.96	2.327	31447.371	40.51099389	1777.04918	-4.83	>=30	7861.84275	>=60	>=30	<60	<1.3
155	890	2011-2012	63050	1	96	24	Male	Non-Hispanic Black	1.8	More than high school	27.3	88	mild	never	no	130	55	no	0	4.996	42	23	83.98	339	0.881	3.96	0.98	2.56	41633.137	128.99739	3.214285714	3.08	<30	10408.28425	<60	25-30	>=90	1.3-1.8
156	891	2011-2012	63051	2	96	30	Male	Other Race	5	More than high school	24.9	89.5	heavy	never	no	102	62	no	0	5.384	21	20	93.7	339	1.366	3.72	1.03	2.069	51157.346	93.70892813	5.384615385	0.31	<30	12789.3365	<60	<25	>=90	>=1.8
157	896	2011-2012	63056	2	101	21	Male	Other Race	1.1	More than high school	18.9	67.8	never	never	no	103	69	no	0	5.218	14	19	73.37	237.9	0.7	3.96	1.45	2.198	34427.23	125.7783538	6.496062992	0.52	<30	8606.8075	<60	<25	>=90	<1.3
158	897	2011-2012	63057	1	98	29	Male	Non-Hispanic White	2.6	More than high school	20.8	84.2	mild	never	no	107	76	no	0	4.718	17	22	84.86	356.9	0.734	2.9	1.11	1.448	102635.581	106.3801485	3.605150215	-1.84	<30	25658.89525	<60	<25	>=90	>=1.8
159	904	2011-2012	63064	2	95	61	Male	Non-Hispanic Black	1.07	Less than high school	18.7	87.2	mild	now	yes	156	82	no	1	5.829	23	30	68.07	422.3	0.835	5.66	3.88	1.396	20555.986	113.2238051	37.25806452	3.06	>=30	5138.9965	>=60	<25	>=90	<1.3
160	917	2011-2012	63077	2	94	38	Male	Non-Hispanic White	4.59	More than high school	24.4	88.7	mild	never	yes	121	68	no	0	5.829	16	21	82.21	327.1	0.644	4.06	1.55	2.224	213323.316	103.7704893	3.926380368	6.66	<30	53330.829	<60	<25	>=90	>=1.8
161	921	2011-2012	63081	3	90	62	Male	Other Race	2.51	High school or equivalent	25.3	97	heavy	now	no	107	60	preDM	1	5.773	15	16	81.33	267.7	0.881	4.37	1.09	2.87	46852.352	88.82438926	31.62393162	-2.52	>=30	11713.088	>=60	25-30	60-90	>=1.8
162	922	2011-2012	63082	1	101	59	Female	Non-Hispanic White	0.82	Less than high school	22.1	83	former	now	yes	114	69	no	1	5.051	20	24	104.31	345	0.926	4.29	1.37	2.508	439123.833	50.60417359	4.107142857	-2.26	<30	109780.9583	<60	<25	<60	<1.3
163	923	2011-2012	63083	1	98	71	Female	Non-Hispanic White	3.58	More than high school	34.3	114.9	moderate	never	yes	131	76	no	1	5.829	59	48	59.23	404.5	2.168	6.23	1.4	3.853	158332.862	88.71923336	40.59405941	-1	>=30	39583.2155	>=60	>=30	60-90	>=1.8
164	931	2011-2012	63091	2	93	70	Male	Non-Hispanic White	4.48	More than high school	31.3	121.8	moderate	former	yes	115	76	no	0	5.384	25	19	69.84	362.8	1.66	5.35	1.58	3.026	130150.583	90.97780284	5.054347826	-1.12	<30	32537.64575	>=60	>=30	>=90	>=1.8
165	934	2011-2012	63094	1	94	80	Male	Non-Hispanic White	2.58	More than high school	28.4	110.8	mild	never	yes	142	66	DM	0	8.271	19	19	87.52	321.2	1.14	4.34	1.4	2.431	56453.248	71.63334573	8.11023622	1.38	<30	14113.312	>=60	25-30	60-90	>=1.8
166	946	2011-2012	63106	1	95	50	Male	Non-Hispanic White	0.95	Less than high school	27.9	95.4	mild	former	no	125	86	no	0	5.273	20	19	99.01	386.6	1.039	5.07	1.29	3.31	63932.878	76.18266166	11.44736842	-1.13	<30	15983.2195	<60	25-30	60-90	<1.3
167	949	2011-2012	63109	1	101	41	Female	Non-Hispanic White	3.9	Less than high school	36.3	113.2	moderate	former	no	127	82	no	0	5.329	13	14	73.37	333.1	3.647	6.15	1.4	3.077	260427.136	87.86983221	2.068965517	4.61	<30	65106.784	<60	>=30	60-90	>=1.8
168	956	2011-2012	63116	1	99	34	Female	Non-Hispanic White	4.13	More than high school	19.4	73	heavy	now	no	113	75	no	0	3.83	11	15	48.62	273.6	0.892	6.18	2.28	3.491	53222.435	122.7707394	16.05263158	-2.08	<30	13305.60875	<60	<25	>=90	>=1.8
169	957	2011-2012	63117	2	101	24	Male	Other Race	2.2	More than high school	26.2	91	mild	never	no	124	72	preDM	0	5.607	70	38	69.84	475.8	3.647	4.73	1.06	1.991	33234.373	125.6811117	12.8125	-1.48	<30	8308.59325	<60	25-30	>=90	>=1.8
170	964	2011-2012	63124	1	102	54	Female	Other Race	2.39	More than high school	23.1	86.4	never	never	yes	137	77	DM	1	7.993	44	34	72.49	309.3	2.913	5.69	1.32	3.026	38594.757	81.38502359	49.31506849	-0.54	>=30	9648.68925	<60	<25	60-90	>=1.8
171	965	2011-2012	63125	1	93	46	Female	Non-Hispanic Black	1.79	More than high school	25.3	88.8	mild	never	no	114	66	no	0	5.662	18	17	68.95	279.6	1.908	5.77	1.27	3.62	52196.059	105.427686	4.698795181	-3.02	<30	13049.01475	<60	25-30	>=90	1.3-1.8
172	966	2011-2012	63126	1	90	44	Male	Non-Hispanic White	5	More than high school	27	99.1	mild	never	no	120	83	no	0	5.162	24	22	86.63	339	2.156	4.86	1.27	2.612	258233.001	93.38409511	9.90990991	-1.25	<30	64558.25025	<60	25-30	>=90	>=1.8
173	967	2011-2012	63127	1	92	28	Male	Other Race	3.3	More than high school	27.7	89.9	heavy	now	no	127	69	no	0	5.329	75	42	80.44	440.2	3.41	4.53	1.16	1.81	30550.271	114.286839	4.214559387	9.76	<30	7637.56775	<60	25-30	>=90	>=1.8
174	973	2011-2012	63133	2	94	24	Male	Mexican American	2.33	Less than high school	29.8	98.4	heavy	never	no	102	56	no	0	5.551	24	21	83.98	345	0.971	4.58	1.06	3.077	82202.326	111.5866993	9.230769231	3.12	<30	20550.5815	<60	25-30	>=90	>=1.8
175	977	2011-2012	63137	2	94	49	Male	Other Race	5	More than high school	24.7	101.5	never	never	yes	132	91	DM	0	10.38	23	22	91.05	309.3	1.095	5.51	1.16	3.853	40735.912	84.89679167	5.891891892	-1.42	<30	10183.978	<60	<25	60-90	>=1.8
176	982	2011-2012	63142	2	93	54	Male	Non-Hispanic Black	3.93	More than high school	25.1	97.3	never	never	yes	162	74	no	0	5.329	27	24	76.02	291.5	0.994	5.09	1.09	3.543	55924.775	113.6480088	5.757575758	-3.93	<30	13981.19375	<60	25-30	>=90	>=1.8
177	987	2011-2012	63147	3	92	41	Male	Non-Hispanic White	1.41	More than high school	30	109.4	mild	never	yes	112	76	no	0	4.774	19	21	78.68	333.1	1.106	4.84	1.19	3.129	62894.702	106.2019961	4.545454545	-6.87	<30	15723.6755	<60	>=30	>=90	1.3-1.8
178	992	2011-2012	63152	2	96	62	Female	Other Race	0	More than high school	22	87.3	former	never	no	128	63	no	0	5.829	16	21	58.34	249.8	1.061	6.05	2.33	3.233	32984.094	94.97803915	10	6.74	<30	8246.0235	>=60	<25	>=90	<1.3
179	996	2011-2012	63156	2	100	70	Female	Non-Hispanic White	3.4	More than high school	29	91.5	former	former	yes	129	66	preDM	0	5.829	20	25	67.18	261.7	1.558	4.76	2.3	1.733	113550.078	79.73147236	6.266666667	2.48	<30	28387.5195	>=60	25-30	60-90	>=1.8
180	999	2011-2012	63159	2	102	48	Male	Non-Hispanic White	1.16	More than high school	37.6	127.1	mild	former	yes	122	76	no	0	5.329	30	26	77.79	672.1	1.84	4.5	0.96	2.689	77678.693	101.5767548	6.785714286	2.13	<30	19419.67325	<60	>=30	>=90	<1.3
181	1012	2011-2012	63172	1	102	68	Female	Mexican American	1.18	Less than high school	24.1	93	former	former	no	118	67	DM	0	5.662	16	19	50.39	226	1.163	4.86	1.68	2.638	30280.628	95.55772846	8.636363636	0.03	<30	7570.157	>=60	<25	>=90	<1.3
182	1017	2011-2012	63177	2	93	60	Male	Non-Hispanic Black	3.93	High school or equivalent	24	88.6	former	now	no	102	67	preDM	0	5.94	16	16	84.86	279.6	1.908	5.04	1.14	3.026	23930.858	98.91354963	2.222222222	-4.01	<30	5982.7145	>=60	<25	>=90	>=1.8
183	1020	2011-2012	63180	1	91	50	Male	Other Race	5	More than high school	26.2	92	mild	never	no	110	76	no	0	5.329	21	25	90.17	345	1.479	5.9	1.06	4.163	24320.782	85.30276796	4.5	0.74	<30	6080.1955	<60	25-30	60-90	>=1.8
184	1023	2011-2012	63183	1	96	44	Female	Non-Hispanic Black	1.12	Less than high school	34.1	103.2	never	now	no	110	69	preDM	0	6.273	21	16	47.74	202.2	1.061	5.17	1.42	3.258	62002.284	132.72561	8.899082569	-6.65	<30	15500.571	<60	>=30	>=90	<1.3
185	1028	2011-2012	63188	1	100	60	Female	Non-Hispanic Black	1.17	More than high school	54.2	136.2	heavy	never	yes	113	74	DM	1	7.216	32	26	85.75	475.8	1.219	4.81	1.34	2.896	30403.689	73.41410378	169.2607004	-0.94	>=30	7600.92225	>=60	>=30	60-90	<1.3
186	1031	2011-2012	63191	2	92	30	Female	Non-Hispanic White	3.67	More than high school	24.2	81.4	heavy	never	no	110	60	no	0	5.718	17	18	60.11	184.4	0.621	4.84	1.78	2.767	157770.09	117.7556543	3.225806452	7.65	<30	39442.5225	<60	<25	>=90	>=1.8
187	1049	2011-2012	63209	1	102	39	Male	Non-Hispanic White	2.42	High school or equivalent	27.6	105.2	mild	never	yes	114	71	no	0	5.384	22	23	106.96	452	1.152	6.18	1.24	4.422	159215.863	74.9603292	2.033898305	-1.81	<30	39803.96575	<60	25-30	60-90	>=1.8
188	1051	2011-2012	63211	1	92	46	Female	Non-Hispanic White	3.16	High school or equivalent	40.8	124	moderate	now	no	131	73	DM	0	7.771	28	22	49.5	196.3	2.235	4.84	1.37	2.431	214566.535	112.1789362	18.47328244	4.3	<30	53641.63375	<60	>=30	>=90	>=1.8
189	1054	2011-2012	63214	2	102	37	Male	Mexican American	0.59	Less than high school	31.9	110	former	former	no	116	70	no	0	5.718	34	22	73.37	315.2	1.163	4.65	1.27	2.845	73885.341	112.4071359	4.47761194	8.78	<30	18471.33525	<60	>=30	>=90	<1.3
190	1059	2011-2012	63219	3	91	39	Male	Other Race	5	More than high school	20.6	79.9	former	now	no	112	71	no	0	5.662	25	29	85.75	303.3	1.016	5.82	1.4	3.957	42647.54	97.92914689	5	2.16	<30	10661.885	<60	<25	>=90	>=1.8
191	1060	2011-2012	63220	1	103	27	Male	Non-Hispanic White	0.81	More than high school	26.3	98.6	mild	never	no	115	78	no	0	4.774	24	19	83.1	350.9	0.768	3.28	1.11	1.81	53323.761	110.6665678	9.504132231	1.06	<30	13330.94025	<60	25-30	>=90	<1.3
192	1061	2011-2012	63221	3	92	67	Female	Mexican American	2.97	High school or equivalent	37	121.3	former	never	no	103	57	preDM	0	4.996	22	57	66.3	374.7	0.779	3.57	1.27	1.94	51274.053	82.74401763	2.429906542	-3.19	<30	12818.51325	>=60	>=30	60-90	>=1.8
193	1064	2011-2012	63224	1	103	31	Female	Mexican American	0.51	Less than high school	29.3	103	mild	never	no	112	62	no	0	4.663	29	22	61.88	261.7	1.31	4.29	1.37	2.327	66032.687	115.8215027	4.696969697	-4.16	<30	16508.17175	<60	25-30	>=90	<1.3
194	1070	2011-2012	63230	1	93	48	Male	Other Race	5	More than high school	28.2	96	mild	now	yes	108	75	preDM	0	6.883	44	37	90.17	410.4	1.716	5.4	1.22	3.414	42123.931	86.50966429	3.815028902	2.62	<30	10530.98275	<60	25-30	60-90	>=1.8
195	1074	2011-2012	63234	1	92	35	Female	Other Race	0.9	More than high school	24.6	90.5	mild	never	no	117	71	no	0	5.162	18	19	51.27	226	1.185	4.42	1.34	2.534	45704.774	119.7996736	6.888888889	-1.44	<30	11426.1935	<60	<25	>=90	<1.3
196	1076	2011-2012	63236	2	98	80	Male	Other Race	1.1	High school or equivalent	29.4	105	former	never	yes	133	64	DM	1	6.439	25	21	99.89	356.9	1.298	5.25	1.11	3.543	32534.618	61.04728416	355.5555556	2.03	>=30	8133.6545	>=60	25-30	60-90	<1.3
197	1088	2011-2012	63248	1	101	75	Male	Non-Hispanic White	5	Less than high school	26.6	102.4	former	former	yes	134	61	DM	0	8.771	32	40	53.04	345	1.66	4.65	1.22	2.689	137215.728	98.35269332	6.333333333	0.42	<30	34303.932	>=60	25-30	>=90	>=1.8
198	1103	2011-2012	63263	2	93	53	Male	Other Race	1.39	High school or equivalent	29.2	102.9	never	never	yes	151	86	DM	0	7.272	23	28	106.96	434.2	1.603	6.39	1.03	4.629	52926.44	67.93928377	4.17721519	0.6	<30	13231.61	<60	25-30	60-90	1.3-1.8
199	1121	2011-2012	63281	2	98	40	Male	Mexican American	1.21	More than high school	29.1	88.2	heavy	now	yes	130	73	preDM	0	6.439	35	29	66.3	374.7	1.964	6.23	1.09	4.241	76825.639	114.7446762	14.40594059	-2.01	<30	19206.40975	<60	25-30	>=90	<1.3
200	1124	2011-2012	63284	1	97	79	Male	Non-Hispanic White	2.64	More than high school	30.6	100.2	mild	former	yes	113	73	preDM	0	5.995	24	26	97.24	327.1	1.185	3.52	1.06	1.914	192710.038	63.51044875	6.796116505	-0.51	<30	48177.5095	>=60	>=30	60-90	>=1.8
201	1125	2011-2012	63285	2	95	80	Female	Non-Hispanic White	1.16	High school or equivalent	26.2	95	never	former	yes	148	65	no	1	5.495	13	20	80.44	398.5	1.095	5.09	1.4	3.207	110724.92	59.77847874	34.2	-3.54	>=30	27681.23	>=60	25-30	<60	<1.3
202	1131	2011-2012	63291	1	96	47	Male	Non-Hispanic Black	5	More than high school	40.5	126	mild	never	no	122	78	no	0	5.329	23	18	92.82	469.9	0.881	5.12	1.27	3.439	61507.392	97.24417921	3.130081301	-0.88	<30	15376.848	<60	>=30	>=90	>=1.8
203	1133	2011-2012	63293	2	98	61	Female	Mexican American	1.93	Less than high school	30.1	84.1	never	never	no	120	54	no	0	5.384	21	25	51.27	160.6	0.813	5.22	2.2	2.664	24183.58	99.80127638	7.5	-4.11	<30	6045.895	>=60	>=30	>=90	>=1.8
204	1135	2011-2012	63295	2	102	80	Male	Non-Hispanic White	1.15	More than high school	23.3	97.1	mild	former	yes	133	34	preDM	0	6.717	14	18	62.76	226	0.802	3.78	1.32	2.095	114854.436	88.61056023	6.428571429	6.91	<30	28713.609	>=60	<25	60-90	<1.3
205	1136	2011-2012	63296	1	92	55	Female	Other Race	4.44	More than high school	23.2	78.8	never	never	no	106	62	no	0	4.885	23	21	59.23	356.9	0.824	5.92	1.91	3.62	47620.432	99.27269326	5.950413223	7.75	<30	11905.108	<60	<25	>=90	>=1.8
206	1138	2011-2012	63298	1	90	22	Female	Other Race	3.7	More than high school	19.4	65.8	mild	never	no	107	65	no	0	5.329	10	15	72.49	273.6	0.779	4.22	1.66	2.198	37369.943	101.8986762	7.34375	-3.31	<30	9342.48575	<60	<25	>=90	>=1.8
207	1142	2011-2012	63302	1	101	28	Male	Non-Hispanic White	1.45	More than high school	22.6	88.2	heavy	now	no	115	66	no	0	4.94	29	30	78.68	422.3	1.705	6.31	1.58	3.957	314681.737	116.3569822	6.363636364	-1.29	<30	78670.43425	<60	<25	>=90	1.3-1.8
208	1145	2011-2012	63305	2	94	37	Male	Non-Hispanic White	1.18	High school or equivalent	26.7	93	former	now	no	109	54	no	0	5.662	31	30	79.56	374.7	0.892	4.03	1.27	2.353	36120.618	108.7279768	2.857142857	4.92	<30	9030.1545	<60	25-30	>=90	<1.3
209	1148	2011-2012	63308	1	102	28	Male	Non-Hispanic Black	0.73	More than high school	22.9	81	mild	never	no	103	64	no	0	4.996	29	29	91.94	279.6	0.847	3.7	1.14	2.172	88769.193	112.4222956	1.980676329	3.06	<30	22192.29825	<60	<25	>=90	<1.3
210	1152	2011-2012	63312	3	91	74	Male	Non-Hispanic White	2.92	High school or equivalent	23.5	102.3	mild	now	no	102	56	no	1	5.829	15	26	81.33	267.7	1.332	4.16	1.55	1.991	153499.253	81.64380034	45.83333333	-5.14	>=30	38374.81325	>=60	<25	60-90	>=1.8
211	1160	2011-2012	63320	3	91	27	Female	Other Race	2.72	More than high school	20.9	74	never	never	no	102	71	no	0	4.829	15	22	55.69	237.9	0.327	3.49	1.73	1.603	41502.559	123.323663	6.875	-0.01	<30	10375.63975	<60	<25	>=90	>=1.8
212	1163	2011-2012	63323	3	91	48	Female	Other Race	5	More than high school	19.3	70.7	mild	never	no	129	79	no	0	4.774	13	17	72.49	356.9	1.885	4.89	1.94	2.095	46284.584	84.88852798	7.356321839	3.61	<30	11571.146	<60	<25	60-90	>=1.8
213	1169	2011-2012	63329	1	90	71	Female	Non-Hispanic White	5	High school or equivalent	31.1	102.4	mild	former	no	110	76	no	0	4.774	21	29	80.44	303.3	1.095	4.81	1.6	2.715	66074.341	63.67978997	15.64102564	-2.45	<30	16518.58525	>=60	>=30	60-90	>=1.8
214	1171	2011-2012	63331	2	95	31	Female	Non-Hispanic White	1.98	More than high school	50.8	145.3	moderate	now	yes	132	76	DM	0	10.658	35	73	61.88	303.3	2.992	4.19	0.54	2.276	132982.695	115.8215027	11.24293785	-3.21	<30	33245.67375	<60	>=30	>=90	>=1.8
215	1180	2011-2012	63340	1	94	26	Male	Non-Hispanic White	0.74	More than high school	29.7	104.1	former	now	yes	120	80	no	0	5.107	23	18	69.84	321.2	1.332	5.15	1.01	3.517	78537.797	123.9277345	4.678899083	-1.94	<30	19634.44925	<60	25-30	>=90	<1.3
216	1183	2011-2012	63343	2	101	45	Female	Non-Hispanic White	4.86	More than high school	43	139.5	mild	never	yes	140	63	no	0	5.051	16	18	53.92	255.8	1.569	3.96	1.01	2.224	292050.997	109.8354197	5.849056604	-2.14	<30	73012.74925	<60	>=30	>=90	>=1.8
217	1185	2011-2012	63345	1	99	68	Female	Non-Hispanic Black	1.84	More than high school	21.5	80.4	moderate	never	yes	138	93	no	1	4.996	20	22	102.54	303.3	0.689	5.28	2.59	2.379	43182.609	55.90501999	4.383561644	6.26	<30	10795.65225	>=60	<25	<60	>=1.8
218	1193	2011-2012	63353	1	102	23	Female	Non-Hispanic White	0.21	More than high school	31.5	106.4	moderate	never	no	100	62	no	0	5.273	23	19	54.81	321.2	2.585	5.02	1.14	2.689	74387.576	127.5074607	2.637362637	-4.37	<30	18596.894	<60	>=30	>=90	<1.3
219	1197	2011-2012	63357	2	97	31	Female	Mexican American	0.6	Less than high school	39.2	114	former	never	no	105	72	no	0	5.329	22	22	43.32	345	1.953	5.46	1.34	3.207	83206.844	130.242265	18.71794872	-3.84	<30	20801.711	<60	>=30	>=90	<1.3
220	1203	2011-2012	63363	2	95	65	Female	Other Race	0.75	More than high school	36.7	123.3	former	never	yes	167	79	no	0	5.273	10	13	56.58	285.5	1.005	5.02	1.45	3.103	72059.177	93.94370584	11.83673469	-3.5	<30	18014.79425	>=60	>=30	>=90	<1.3
221	1217	2011-2012	63377	1	96	39	Female	Non-Hispanic Black	5	More than high school	37.5	118	moderate	never	yes	172	86	DM	1	16.153	33	29	305.86	422.3	2.8	4.71	0.88	2.534	79325.085	18.28560383	2238.095238	-4.29	>=30	19831.27125	<60	>=30	<60	>=1.8
222	1223	2011-2012	63383	2	97	51	Male	Non-Hispanic Black	1.7	Less than high school	33.5	109	mild	former	no	113	54	no	0	4.996	26	27	78.68	398.5	0.892	5.22	1.06	3.75	46731.008	114.4441654	3.157894737	7.82	<30	11682.752	<60	>=30	>=90	1.3-1.8
223	1227	2011-2012	63387	2	101	20	Male	Non-Hispanic Black	0.23	More than high school	21.2	74.1	mild	never	no	131	67	no	0	4.774	22	27	116.69	362.8	0.463	3.88	1.45	2.224	102547.833	89.14107874	15.2173913	-4.22	<30	25636.95825	<60	<25	60-90	<1.3
224	1229	2011-2012	63389	1	95	80	Male	Non-Hispanic White	1.65	More than high school	22.7	97.1	former	former	yes	167	84	preDM	0	5.718	21	26	66.3	255.8	0.835	5.56	2.15	3.026	68708.028	86.63681626	9.295774648	0.67	<30	17177.007	>=60	<25	60-90	1.3-1.8
225	1231	2011-2012	63391	3	90	70	Male	Other Race	1.15	More than high school	30.7	103.6	heavy	former	yes	137	79	no	0	5.551	23	28	80.44	321.2	1.163	4.27	1.42	2.302	23287.1	85.08728337	8.985507246	1.27	<30	5821.775	>=60	>=30	60-90	<1.3
226	1240	2011-2012	63400	2	90	21	Female	Non-Hispanic Black	1.46	More than high school	28.6	97.1	mild	never	no	119	68	no	1	4.996	19	26	79.56	380.7	0.7	4.68	1.81	2.56	36527.854	105.7028368	44.28571429	-2.14	>=30	9131.9635	<60	25-30	>=90	1.3-1.8
227	1266	2011-2012	63426	1	95	58	Male	Non-Hispanic White	1.19	Less than high school	26.9	105.8	moderate	now	yes	142	82	preDM	0	6.384	17	21	86.63	220.1	0.858	4.16	1.53	2.25	65810.24	84.63741561	17.98913043	-4.88	<30	16452.56	<60	25-30	60-90	<1.3
228	1279	2011-2012	63439	2	93	51	Male	Other Race	3.4	High school or equivalent	32.3	114.6	mild	never	yes	117	78	no	1	4.718	29	29	99.01	386.6	1.705	5.35	1.27	3.31	55053.58	75.64938303	589.6103896	0.29	>=30	13763.395	<60	>=30	60-90	>=1.8
229	1282	2011-2012	63442	1	97	51	Female	Non-Hispanic Black	1.61	More than high school	33.6	116.2	former	now	no	111	78	no	0	5.662	21	29	92.82	321.2	1.445	3.78	1.32	1.784	64015.13	71.06003697	5.92	7.8	<30	16003.7825	<60	>=30	60-90	1.3-1.8
230	1296	2011-2012	63456	1	98	80	Male	Mexican American	5	More than high school	19.6	81.6	former	now	no	113	66	no	1	4.94	12	22	129.95	327.1	1.185	4.91	1.09	3.284	30564.823	44.41723587	30.52631579	-2.44	>=30	7641.20575	>=60	<25	<60	>=1.8
231	1303	2011-2012	63463	2	95	61	Female	Non-Hispanic White	5	More than high school	21.7	83.4	heavy	now	yes	134	82	no	0	6.051	12	22	62.76	255.8	0.734	4.86	1.78	2.741	266898.106	92.21866632	5	2.66	<30	66724.5265	>=60	<25	>=90	>=1.8
232	1306	2011-2012	63466	1	96	49	Male	Non-Hispanic Black	2.19	High school or equivalent	22.8	85	heavy	now	yes	153	76	preDM	0	6.162	15	16	83.1	368.8	0.926	6.21	1.68	4.112	70908.882	109.614599	4.166666667	-3.14	<30	17727.2205	<60	<25	>=90	>=1.8
233	1312	2011-2012	63472	1	91	24	Female	Non-Hispanic White	1.93	More than high school	24.6	94.6	moderate	former	no	85	45	no	0	4.996	14	15	65.42	232	0.914	3.62	1.34	1.862	301281.409	113.754042	4.772727273	5.02	<30	75320.35225	<60	<25	>=90	>=1.8
234	1321	2011-2012	63481	2	91	48	Female	Other Race	0.76	High school or equivalent	29.8	99.7	never	former	no	95	59	no	0	4.718	13	19	58.34	202.2	0.79	5.56	1.68	3.517	84703.421	104.7933491	3.561643836	8.91	<30	21175.85525	<60	25-30	>=90	<1.3
235	1329	2011-2012	63489	2	92	32	Male	Non-Hispanic White	4.89	More than high school	37.8	125.2	mild	never	no	129	75	no	0	5.829	68	42	77.79	422.3	1.761	4.37	0.96	2.612	189200.876	113.6596613	5.508474576	-2.28	<30	47300.219	<60	>=30	>=90	>=1.8
236	1339	2011-2012	63499	2	102	33	Female	Other Race	1.09	Less than high school	43.2	115.5	moderate	never	no	108	65	DM	0	14.988	27	24	42.43	166.5	2.021	4.63	0.59	3.103	88327.701	129.2994211	7.313432836	0.83	<30	22081.92525	<60	>=30	>=90	<1.3
237	1342	2011-2012	63502	1	98	73	Male	Non-Hispanic White	1.59	Less than high school	33.5	120.3	never	former	yes	125	70	DM	1	6.217	17	21	106.08	255.8	1.095	5.48	1.32	3.672	25656.814	59.62979554	47.03910615	0.05	>=30	6414.2035	>=60	>=30	<60	1.3-1.8
238	1344	2011-2012	63504	3	92	54	Male	Mexican American	4.3	Less than high school	31.8	112.9	mild	never	yes	141	79	DM	0	6.661	42	27	73.37	345	1.614	3.85	1.22	1.888	74990.476	99.75418088	3.876404494	-3.83	<30	18747.619	<60	>=30	>=90	>=1.8
239	1350	2011-2012	63510	1	91	56	Female	Non-Hispanic White	5	More than high school	21.6	90.6	moderate	never	yes	111	67	no	0	5.773	28	28	54.81	345	1.344	6.1	1.6	3.879	448223.274	101.1255268	27.27272727	2.13	<30	112055.8185	<60	<25	>=90	>=1.8
240	1355	2011-2012	63515	1	98	54	Female	Non-Hispanic White	5	More than high school	27.1	95.2	moderate	never	no	97	72	no	0	4.94	21	36	59.23	184.4	1.897	6.41	1.6	3.931	521033.371	99.97250077	8.75	-4.76	<30	130258.3428	<60	25-30	>=90	>=1.8
241	1359	2011-2012	63519	1	96	54	Male	Non-Hispanic Black	2.78	More than high school	25.5	95.4	mild	former	yes	127	76	no	0	5.329	24	20	91.05	339	0.463	2.69	1.09	1.396	46773.449	94.75584577	20	0.09	<30	11693.36225	<60	25-30	>=90	>=1.8
242	1363	2011-2012	63523	1	93	22	Female	Other Race	3.95	More than high school	21	75.5	moderate	never	no	105	72	no	0	5.44	17	25	65.42	309.3	0.677	6.88	1.78	4.784	314479.555	115.3634779	2	9.56	<30	78619.88875	<60	<25	>=90	>=1.8
243	1368	2011-2012	63528	2	101	34	Female	Non-Hispanic Black	1.54	More than high school	49.2	140.7	heavy	now	yes	120	87	no	0	5.329	17	18	66.3	446.1	1.061	5.07	1.22	3.362	100991.97	120.2699138	4	3.13	<30	25247.9925	<60	>=30	>=90	1.3-1.8
244	1369	2011-2012	63529	1	100	23	Male	Non-Hispanic White	1.06	More than high school	19.1	79.5	heavy	former	yes	115	64	DM	0	17.319	28	25	80.44	237.9	0.644	3.49	1.29	1.914	74829.463	118.3722707	6.41025641	-1.91	<30	18707.36575	<60	<25	>=90	<1.3
245	1391	2011-2012	63551	2	103	54	Female	Non-Hispanic White	3.44	High school or equivalent	28.6	94.3	mild	never	no	132	71	no	0	5.218	19	20	70.72	345	1.389	3.72	1.32	1.758	276924.476	83.85127042	8.341708543	1.82	<30	69231.119	<60	25-30	60-90	>=1.8
246	1399	2011-2012	63559	1	97	41	Male	Other Race	4.77	More than high school	24.9	90.5	former	never	no	110	76	no	0	5.551	28	25	100.78	315.2	3.997	4.71	0.85	2.017	43575.922	79.43639554	2.994652406	-1.65	<30	10893.9805	<60	<25	60-90	>=1.8
247	1400	2011-2012	63560	2	94	40	Male	Non-Hispanic White	1.17	High school or equivalent	31.1	107.2	heavy	never	no	NA	NA	no	0	5.329	25	23	107.85	523.4	1.976	4.4	0.98	2.508	234357.203	73.69859544	5.529953917	-2.59	<30	58589.30075	<60	>=30	60-90	<1.3
248	1402	2011-2012	63562	1	98	22	Male	Non-Hispanic White	0	High school or equivalent	20.1	74.2	mild	now	no	127	81	no	0	4.718	19	19	76.91	291.5	0.881	4.47	1.19	2.87	109227.397	122.5050066	5.176470588	2.21	<30	27306.84925	<60	<25	>=90	<1.3
249	1406	2011-2012	63566	2	101	62	Female	Non-Hispanic Black	0.64	Less than high school	38.8	118.2	mild	former	yes	134	54	DM	0	9.714	11	13	83.1	327.1	1.231	5.02	1.03	3.414	36334.789	75.19231399	13.90977444	-3.99	<30	9083.69725	>=60	>=30	60-90	<1.3
250	1411	2011-2012	63571	1	99	36	Male	Other Race	3.99	Less than high school	25.4	85	mild	never	no	117	83	no	0	5.662	28	30	90.17	261.7	0.745	4.22	1.53	2.353	26013.642	94.11820693	4.406779661	-2.49	<30	6503.4105	<60	25-30	>=90	>=1.8
251	1412	2011-2012	63572	2	92	28	Female	Non-Hispanic White	3.67	More than high school	33.8	95.8	mild	never	no	106	71	no	0	4.274	19	20	61	267.7	1.095	4.94	1.32	3.129	169978.87	118.8494987	8.533333333	6.6	<30	42494.7175	<60	>=30	>=90	>=1.8
252	1413	2011-2012	63573	1	96	20	Female	Non-Hispanic Black	2.31	More than high school	20	71.5	never	never	no	118	69	no	0	4.94	9	15	73.37	214.1	0.598	3.47	1.5	1.681	59551.04	117.3954256	7.735042735	0.05	<30	14887.76	<60	<25	>=90	>=1.8
253	1416	2011-2012	63576	1	90	46	Male	Other Race	5	More than high school	27.7	99	heavy	now	yes	141	86	no	0	5.773	30	34	86.63	309.3	3.918	6	0.88	3.336	83457.838	92.0812936	2.451612903	4.81	<30	20864.4595	<60	25-30	>=90	>=1.8
254	1419	2011-2012	63579	1	94	63	Male	Non-Hispanic White	2.41	High school or equivalent	24.3	88.3	never	never	no	137	68	DM	1	10.047	13	18	659.46	279.6	0.779	3.83	1.81	1.655	249279.848	7.023599178	195.6521739	-2.18	>=30	62319.962	>=60	<25	<60	>=1.8
255	1449	2011-2012	63609	2	103	66	Male	Other Race	1.2	Less than high school	26.7	96.3	mild	former	no	116	51	no	1	5.94	16	21	116.69	380.7	1.185	4.71	1.06	3.103	50407.995	55.81807109	2.872340426	-3.3	<30	12601.99875	>=60	25-30	<60	<1.3
256	1454	2011-2012	63614	2	97	58	Female	Non-Hispanic White	0.77	Less than high school	28.8	102.4	former	now	no	96	54	no	0	5.94	13	17	67.18	428.3	1.321	5.72	1.09	4.034	70144.929	86.74387164	5.376344086	-2.7	<30	17536.23225	<60	25-30	60-90	<1.3
257	1455	2011-2012	63615	1	93	26	Female	Non-Hispanic White	5	More than high school	23.6	78	moderate	never	no	100	56	no	0	5.384	21	29	61	279.6	1.05	3.93	1.78	1.655	314479.555	120.5310271	4.352941176	2.51	<30	78619.88875	<60	<25	>=90	>=1.8
258	1465	2011-2012	63625	3	92	23	Female	Mexican American	0.4	More than high school	22.5	82.1	former	never	no	107	71	no	1	5.273	12	22	49.5	232	0.497	4.11	1.6	2.276	122256.364	131.8495348	134.3612335	3.22	>=30	30564.091	<60	<25	>=90	<1.3
259	1469	2011-2012	63629	3	91	36	Female	Other Race	2.16	More than high school	20.1	76.8	mild	never	no	98	51	no	0	4.996	39	34	58.34	279.6	0.474	4.76	1.81	2.741	36528.381	114.0099456	4	2.62	<30	9132.09525	<60	<25	>=90	>=1.8
260	1472	2011-2012	63632	1	95	80	Female	Non-Hispanic White	2.72	High school or equivalent	24.3	86	former	never	yes	177	87	DM	1	6.495	25	42	82.21	386.6	0.881	3.85	1.5	1.94	144258.54	58.22775115	920.3539823	-3.16	>=30	36064.635	>=60	<25	<60	>=1.8
261	1473	2011-2012	63633	2	99	48	Male	Non-Hispanic Black	4.9	More than high school	30.6	110.2	mild	never	yes	165	91	DM	1	17.597	31	25	107.85	285.5	0.79	2.84	0.96	1.526	25807.554	80.54186668	250	2.66	>=30	6451.8885	<60	>=30	60-90	>=1.8
262	1478	2011-2012	63638	1	92	47	Female	Non-Hispanic White	3.4	More than high school	35	116	former	former	no	117	70	no	1	4.496	18	19	57.46	202.2	1.05	3.36	0.85	2.017	298486.603	106.0634946	33.87755102	1.73	>=30	74621.65075	<60	>=30	>=90	>=1.8
263	1482	2011-2012	63642	1	93	25	Male	Non-Hispanic Black	0.32	High school or equivalent	28.9	96.6	mild	former	no	129	84	no	0	5.384	31	23	89.28	392.6	1.739	6.39	1.29	4.293	73576.995	118.9524715	9.253731343	-1.59	<30	18394.24875	<60	25-30	>=90	<1.3
264	1488	2011-2012	63648	1	101	31	Female	Non-Hispanic White	1.55	More than high school	45.1	125.3	heavy	never	no	NA	NA	no	0	5.329	30	20	69.84	392.6	0.914	4.09	1.45	2.224	145340.495	100.0648555	4.966442953	3.01	<30	36335.12375	<60	>=30	>=90	1.3-1.8
265	1497	2011-2012	63657	1	97	30	Male	Other Race	4.5	More than high school	28.3	103.5	mild	never	no	124	81	no	0	5.495	22	18	75.14	327.1	1.061	5.02	0.98	3.543	47122.477	116.9227605	5.740072202	0.84	<30	11780.61925	<60	25-30	>=90	>=1.8
266	1499	2011-2012	63659	1	95	80	Male	Non-Hispanic White	5	High school or equivalent	29.7	111	mild	former	yes	122	59	no	1	5.495	13	19	144.09	428.3	1.106	3.54	1.09	1.94	75846.055	39.20156204	5.614035088	1.69	<30	18961.51375	>=60	25-30	<60	>=1.8
267	1501	2011-2012	63661	2	91	46	Female	Non-Hispanic White	0.44	More than high school	26.2	97.1	never	now	no	110	85	no	0	5.718	15	15	69.84	220.1	1.953	6.08	1.32	3.853	69784.721	90.05758567	5.714285714	3.49	<30	17446.18025	<60	25-30	>=90	<1.3
268	1502	2011-2012	63662	2	95	80	Male	Non-Hispanic White	4.3	More than high school	29.3	109	former	never	no	133	68	no	0	5.495	20	18	97.24	362.8	1.073	3.13	1.19	1.448	69734.498	63.0658756	8.425925926	5	<30	17433.6245	>=60	25-30	60-90	>=1.8
269	1504	2011-2012	63664	2	91	58	Male	Other Race	5	More than high school	27.3	98	mild	never	yes	141	78	DM	0	16.875	23	19	69.84	291.5	2.314	6.98	1.5	4.422	38725.39	98.97931918	26.04651163	0.3	<30	9681.3475	<60	25-30	>=90	>=1.8
270	1505	2011-2012	63665	2	93	56	Male	Other Race	2.91	High school or equivalent	29.6	102.4	mild	never	no	135	87	DM	1	6.162	32	26	84.86	422.3	1.942	6.83	1.32	4.629	53712.153	88.00154594	381.25	7.71	>=30	13428.03825	<60	25-30	60-90	>=1.8
271	1513	2011-2012	63673	1	101	43	Male	Non-Hispanic White	0.97	Less than high school	32.7	112.6	heavy	now	yes	165	116	no	0	5.718	18	20	71.6	345	1.027	5.09	1.78	2.845	268838.903	108.8536827	10.3125	1.66	<30	67209.72575	<60	>=30	>=90	<1.3
272	1524	2011-2012	63684	2	93	54	Female	Non-Hispanic Black	2.78	More than high school	28.8	99.8	former	never	no	133	85	no	0	5.995	22	28	68.95	315.2	0.903	5.79	1.5	3.879	54654.755	99.66637496	12.42105263	-3.98	<30	13663.68875	<60	25-30	>=90	>=1.8
273	1525	2011-2012	63685	3	91	60	Female	Other Race	0.89	More than high school	26.3	87.3	mild	never	no	98	61	no	0	5.384	20	19	40.66	184.4	1.4	5.69	1.29	3.75	35156.517	108.4694231	8.225806452	2.07	<30	8789.12925	>=60	25-30	>=90	<1.3
274	1529	2011-2012	63689	2	98	66	Female	Non-Hispanic White	5	High school or equivalent	26.4	102.3	moderate	former	yes	107	60	no	0	5.662	21	19	57.46	255.8	1.581	6.1	1.5	3.879	192349.491	92.81147049	9.135802469	5.06	<30	48087.37275	>=60	25-30	>=90	>=1.8
275	1530	2011-2012	63690	1	93	29	Male	Other Race	5	More than high school	22.2	82.9	never	never	no	106	64	no	0	5.384	15	20	77.79	190.3	1.558	6.44	1.32	4.396	35027.045	116.0803241	7.272727273	11.86	<30	8756.76125	<60	<25	>=90	>=1.8
276	1539	2011-2012	63699	1	99	47	Female	Non-Hispanic Black	1.46	More than high school	24.9	82.5	mild	never	no	105	57	no	0	5.384	13	19	65.42	214.1	0.689	5.74	1.53	3.905	52351.817	111.5694131	7.78280543	3.52	<30	13087.95425	<60	<25	>=90	1.3-1.8
277	1540	2011-2012	63700	1	96	40	Male	Non-Hispanic Black	2.19	High school or equivalent	31.9	109	moderate	never	yes	146	96	DM	1	3.941	16	16	106.96	315.2	0.768	4.71	1.11	3.233	41330.924	86.04967322	81.1965812	-2.11	>=30	10332.731	<60	>=30	60-90	>=1.8
278	1541	2011-2012	63701	1	90	55	Male	Non-Hispanic White	5	More than high school	25.7	89.4	mild	never	yes	130	75	no	0	4.996	20	25	106.08	416.4	3.24	5.38	0.88	3.026	310455.892	67.66698828	20.63492063	2.62	<30	77613.973	<60	25-30	60-90	>=1.8
279	1548	2011-2012	63708	2	102	63	Male	Other Race	1.72	More than high school	30.9	109.6	heavy	former	yes	137	67	DM	1	6.217	20	23	77.79	196.3	0.802	3.52	1.47	1.681	31222.339	91.41828317	93.53333333	0.62	>=30	7805.58475	>=60	>=30	>=90	1.3-1.8
280	1559	2011-2012	63719	1	94	21	Male	Non-Hispanic White	0.74	High school or equivalent	19.3	72.9	mild	now	no	124	55	preDM	0	6.384	14	20	59.23	297.4	0.655	4.09	1.29	2.483	84857.993	137.3505044	8.703703704	-0.12	<30	21214.49825	<60	<25	>=90	<1.3
281	1561	2011-2012	63721	1	94	22	Female	Non-Hispanic White	2.43	High school or equivalent	18.3	73	heavy	never	no	118	64	no	0	5.884	16	20	62.76	243.9	0.892	3.54	1.32	1.81	263819.581	121.2825015	5.323193916	-5.94	<30	65954.89525	<60	<25	>=90	>=1.8
282	1563	2011-2012	63723	3	92	62	Female	Mexican American	1.56	Less than high school	32.1	101.8	never	never	yes	96	68	DM	1	8.382	21	22	91.94	499.6	2.145	5.74	1.06	3.698	33321.252	57.72263152	30.90909091	-4.69	>=30	8330.313	>=60	>=30	<60	1.3-1.8
283	1576	2011-2012	63736	2	101	36	Male	Non-Hispanic Black	1.54	High school or equivalent	36.7	116.1	heavy	now	yes	154	107	preDM	0	6.439	30	30	102.54	374.7	1.456	5.61	1.01	3.931	114696.443	93.13438158	22.11143695	6.36	<30	28674.11075	<60	>=30	>=90	1.3-1.8
284	1579	2011-2012	63739	2	90	71	Female	Non-Hispanic Black	0.31	Less than high school	20.4	81.5	mild	now	yes	189	56	DM	0	17.763	15	25	86.63	291.5	0.869	3.34	1.27	1.681	43772.678	67.11752544	26.82926829	-0.62	<30	10943.1695	>=60	<25	60-90	<1.3
285	1581	2011-2012	63741	3	92	72	Male	Mexican American	1.39	High school or equivalent	25.7	101	heavy	former	yes	156	71	preDM	0	5.495	32	43	80.44	333.1	1.005	6.23	2.74	3.026	50720.77	83.90023068	3.494623656	-0.52	<30	12680.1925	>=60	25-30	60-90	1.3-1.8
286	1590	2011-2012	63750	1	98	20	Female	Non-Hispanic Black	0.27	More than high school	28	85.2	moderate	never	no	114	70	no	0	4.607	12	11	56.58	202.2	0.361	4.16	2.12	1.888	55823.919	148.5583618	11.65562914	2.62	<30	13955.97975	<60	25-30	>=90	<1.3
287	1592	2011-2012	63752	1	94	60	Male	Non-Hispanic White	1.25	High school or equivalent	27.2	99.7	mild	now	no	119	69	DM	0	6.051	20	25	80.44	333.1	1.4	4.03	0.93	2.457	54869.607	91.27927311	8.493150685	-3.93	<30	13717.40175	>=60	25-30	>=90	<1.3
288	1593	2011-2012	63753	1	100	33	Male	Mexican American	0.68	High school or equivalent	26	90	mild	never	no	115	75	no	0	5.94	33	26	74.26	398.5	1.502	6.13	1.09	4.344	71024.492	115.042735	6.428571429	0.13	<30	17756.123	<60	25-30	>=90	<1.3
289	1599	2011-2012	63759	1	99	56	Male	Non-Hispanic White	4.86	More than high school	21.8	86	mild	never	no	124	82	no	0	5.329	20	22	87.52	345	1.355	4.81	1.14	3.051	197531.798	84.78778152	4.6875	-2.52	<30	49382.9495	<60	<25	60-90	>=1.8
290	1601	2011-2012	63761	2	103	21	Female	Other Race	2.64	High school or equivalent	22	82.7	heavy	never	no	122	70	no	0	4.94	19	20	53.92	255.8	0.734	4.73	1.24	3.155	90372.688	130.005118	5.555555556	1.04	<30	22593.172	<60	<25	>=90	>=1.8
291	1602	2011-2012	63762	1	92	23	Male	Non-Hispanic White	1.15	More than high school	28.3	97.2	mild	never	no	118	53	DM	0	9.492	12	16	58.34	208.2	0.779	3.8	1.71	1.733	77289.065	136.2739806	5.633802817	0.69	<30	19322.26625	<60	25-30	>=90	<1.3
292	1605	2011-2012	63765	2	98	80	Male	Non-Hispanic White	4.64	Less than high school	23.8	89.4	former	former	yes	82	37	no	1	5.94	13	10	175.03	559.1	1.118	2.84	0.8	1.526	60481.454	30.98631783	36.81818182	8.72	>=30	15120.3635	>=60	<25	<60	>=1.8
293	1611	2011-2012	63771	1	101	43	Male	Non-Hispanic White	2.71	More than high school	39.9	122.7	former	never	yes	135	85	no	0	5.995	54	40	98.12	422.3	2.055	4.73	1.11	2.689	70536.361	80.89478229	3.011363636	3.22	<30	17634.09025	<60	>=30	60-90	>=1.8
294	1621	2011-2012	63781	2	93	63	Female	Other Race	4.48	More than high school	30.4	104.2	mild	never	yes	126	86	no	0	5.829	14	16	59.23	226	1.998	6.96	1.14	4.913	28016.592	93.84773434	10.60606061	0.88	<30	7004.148	>=60	>=30	>=90	>=1.8
295	1627	2011-2012	63787	1	95	30	Male	Non-Hispanic White	0.81	High school or equivalent	20	80.7	mild	never	no	126	72	preDM	0	6.162	13	19	75.14	291.5	0.598	4.37	1.16	2.922	54573.63	116.9227605	5.142857143	0.07	<30	13643.4075	<60	<25	>=90	<1.3
296	1639	2011-2012	63799	3	91	69	Male	Other Race	1.12	High school or equivalent	27.2	93.2	mild	never	yes	207	90	no	1	5.495	19	30	95.47	398.5	1.05	8.17	1.66	6.025	23825.312	69.66058742	1817.307692	-2.36	>=30	5956.328	>=60	25-30	60-90	<1.3
297	1642	2011-2012	63802	1	99	48	Female	Non-Hispanic Black	3.4	More than high school	34.9	117	never	never	no	106	80	no	0	5.718	23	21	60.11	285.5	0.587	4.99	1.34	3.388	42097.935	119.6227656	9.142857143	7.05	<30	10524.48375	<60	>=30	>=90	>=1.8
298	1660	2011-2012	63820	2	100	58	Female	Non-Hispanic Black	1.08	More than high school	27	96.8	mild	now	no	111	49	no	0	4.829	12	18	57.46	297.4	1.885	7.81	1.58	5.379	40206.153	113.1757188	4.953271028	2.46	<30	10051.53825	<60	25-30	>=90	<1.3
299	1668	2011-2012	63828	1	91	64	Female	Non-Hispanic White	4.76	More than high school	26.1	88.7	mild	never	yes	127	65	no	0	5.829	27	26	61.88	339	0.723	5.12	2.25	2.534	287755.997	91.85745227	7.638888889	6.5	<30	71938.99925	>=60	25-30	>=90	>=1.8
300	1677	2011-2012	63837	1	91	70	Female	Non-Hispanic White	5	More than high school	39.7	121.6	mild	former	yes	117	61	no	0	6.051	15	19	67.18	499.6	2.077	4.94	1.16	2.819	144462.836	79.73147236	8.431372549	2.04	<30	36115.709	>=60	>=30	60-90	>=1.8
301	1678	2011-2012	63838	2	95	78	Female	Non-Hispanic White	1.34	High school or equivalent	30.8	109.7	never	never	no	105	67	DM	0	6.162	17	21	77.79	309.3	2.202	6.62	1.37	4.241	57260.142	63.13175384	13.49019608	-0.25	<30	14315.0355	>=60	>=30	60-90	1.3-1.8
302	1681	2011-2012	63841	2	102	27	Male	Mexican American	4.76	More than high school	33.1	109.8	heavy	former	no	105	63	no	0	5.551	31	25	77.79	309.3	1.344	4.78	1.14	3.026	123485.766	117.7226732	2.419354839	-1.33	<30	30871.4415	<60	>=30	>=90	>=1.8
303	1689	2011-2012	63849	1	103	34	Male	Non-Hispanic White	2.96	More than high school	30.1	96.3	heavy	never	no	121	80	no	0	4.219	33	29	91.05	398.5	1.513	3.62	0.8	2.121	157814.787	94.33058999	5.380434783	-1.36	<30	39453.69675	<60	>=30	>=90	>=1.8
304	1693	2011-2012	63853	2	92	36	Female	Non-Hispanic White	5	More than high school	18.5	74.5	mild	never	no	NA	NA	no	1	5.218	14	19	70.72	255.8	0.677	5.74	1.84	3.595	179374.376	95.15315089	35.23809524	1.31	>=30	44843.594	<60	<25	>=90	>=1.8
305	1700	2011-2012	63860	3	90	50	Female	Other Race	3.14	High school or equivalent	27.3	90.3	mild	never	no	115	69	preDM	0	6.55	17	21	60.11	309.3	0.903	6	1.58	4.008	262455.942	102.3214627	3.636363636	2.81	<30	65613.9855	<60	25-30	>=90	>=1.8
306	1711	2011-2012	63871	2	100	45	Female	Non-Hispanic Black	2.37	More than high school	33.6	115.5	former	never	no	105	65	no	0	5.329	14	18	58.34	243.9	0.903	4.81	1.47	2.922	43406.592	123.3762514	3.222222222	-4.52	<30	10851.648	<60	>=30	>=90	>=1.8
307	1717	2011-2012	63877	2	101	20	Female	Non-Hispanic Black	0.32	More than high school	17.7	64.7	heavy	never	no	99	39	no	1	4.718	15	21	58.34	226	0.339	4.55	1.86	2.534	83115.885	147.0619629	51.35416667	-2.92	>=30	20778.97125	<60	<25	>=90	<1.3
308	1719	2011-2012	63879	1	99	76	Male	Non-Hispanic White	3.31	More than high school	23.6	99.6	mild	former	yes	152	52	DM	1	8.493	115	111	159.12	374.7	1.152	3.96	1.19	2.25	94320.767	35.7615829	338.5416667	-2.06	>=30	23580.19175	>=60	<25	<60	>=1.8
309	1727	2011-2012	63887	1	94	64	Female	Non-Hispanic White	3.13	High school or equivalent	40.1	127.2	former	former	yes	125	38	DM	0	13.489	31	29	68.95	279.6	4.189	4.55	1.14	1.5	208942.28	80.5926714	11.37724551	3.3	<30	52235.57	>=60	>=30	60-90	>=1.8
310	1730	2011-2012	63890	2	90	60	Female	Other Race	0.68	Less than high school	38.7	108.3	never	former	yes	137	86	no	1	5.273	25	21	65.42	220.1	0.508	3.7	1.27	2.198	25958.362	88.33641763	60.18867925	-0.47	>=30	6489.5905	>=60	>=30	60-90	<1.3
311	1749	2011-2012	63909	2	96	62	Female	Non-Hispanic White	0.95	More than high school	32.2	100.8	former	never	yes	136	64	DM	0	7.161	12	20	63.65	309.3	1.344	4.97	1.55	2.793	98232.766	90.03771006	4.102564103	0.2	<30	24558.1915	>=60	>=30	>=90	<1.3
312	1755	2011-2012	63915	2	95	40	Female	Non-Hispanic White	1.13	More than high school	36.7	133.5	moderate	now	no	108	69	DM	0	9.492	33	24	61	350.9	2.868	4.11	0.91	1.888	40458.379	109.2416714	6.75	4.78	<30	10114.59475	<60	>=30	>=90	<1.3
313	1756	2011-2012	63916	1	94	34	Male	Non-Hispanic White	0.59	Less than high school	38.4	129.5	never	former	no	116	59	DM	0	17.097	40	27	57.46	339	1.163	5.12	0.88	3.698	47617.426	126.9345487	10.20979021	-0.66	<30	11904.3565	<60	>=30	>=90	<1.3
314	1763	2011-2012	63923	2	90	52	Female	Non-Hispanic Black	5	More than high school	30	100.5	moderate	former	no	108	77	no	0	5.051	19	17	50.39	232	0.858	5.02	2.17	2.457	31244.171	123.2603616	7.424242424	2.05	<30	7811.04275	<60	>=30	>=90	>=1.8
315	1764	2011-2012	63924	2	96	29	Female	Non-Hispanic Black	0.57	High school or equivalent	41.9	130	heavy	now	no	98	56	no	1	5.273	15	18	83.1	285.5	2.326	4.63	0.83	2.741	40897.212	94.80871269	32.12058212	-1.81	>=30	10224.303	<60	>=30	>=90	<1.3
316	1779	2011-2012	63939	2	95	66	Male	Non-Hispanic Black	1.32	Less than high school	27.8	97.3	heavy	now	no	106	55	no	0	6.106	20	28	93.7	339	0.914	5.02	1.6	3	24233.386	84.12448294	6.974789916	-3.23	<30	6058.3465	>=60	25-30	60-90	1.3-1.8
317	1781	2011-2012	63941	3	91	53	Female	Other Race	3.24	More than high school	19	78.9	mild	never	yes	133	76	no	0	4.996	19	27	38.01	220.1	1.016	5.82	1.32	4.034	48119.846	116.4927226	18.82352941	10.29	<30	12029.9615	<60	<25	>=90	>=1.8
318	1785	2011-2012	63945	2	92	29	Female	Non-Hispanic White	5	More than high school	30.1	97.8	heavy	never	no	105	67	no	0	5.051	19	23	50.39	321.2	1.377	3.93	1.19	2.121	183907.995	125.6739097	9.62962963	6.07	<30	45976.99875	<60	>=30	>=90	>=1.8
319	1786	2011-2012	63946	3	91	39	Male	Non-Hispanic White	1.22	Less than high school	29.8	102.2	moderate	now	yes	122	58	no	0	5.495	34	36	100.78	350.9	3.782	6.7	0.96	4.008	41170.068	80.56029217	2.954545455	-2.27	<30	10292.517	<60	25-30	60-90	<1.3
320	1788	2011-2012	63948	1	100	50	Female	Non-Hispanic Black	5	High school or equivalent	28.1	100	moderate	never	yes	133	71	no	0	5.44	15	22	66.3	315.2	0.937	6.8	2.12	4.241	57859.305	107.484286	5.636363636	-1.71	<30	14464.82625	<60	25-30	>=90	>=1.8
321	1797	2011-2012	63957	1	103	59	Female	Mexican American	1.33	High school or equivalent	35.4	112.2	moderate	now	no	100	65	DM	0	8.271	113	153	76.02	297.4	1.919	5.38	1.22	3.284	49082.273	74.17935558	6.575342466	-5.24	<30	12270.56825	<60	>=30	60-90	1.3-1.8
322	1799	2011-2012	63959	1	101	41	Male	Non-Hispanic White	1.17	High school or equivalent	26.1	96.7	former	now	yes	148	80	preDM	0	4.94	14	18	83.1	124.9	3.793	5.95	0.83	3.388	59798.291	100.3011517	6.632653061	0.28	<30	14949.57275	<60	25-30	>=90	<1.3
323	1800	2011-2012	63960	1	97	21	Male	Non-Hispanic Black	1.41	More than high school	43.2	138.1	never	never	no	126	83	preDM	0	5.995	56	32	73.37	386.6	0.723	4.34	1.09	2.922	79746.629	145.4033452	1.581395349	0.07	<30	19936.65725	<60	>=30	>=90	1.3-1.8
324	1817	2011-2012	63977	1	99	22	Female	Non-Hispanic Black	1.46	High school or equivalent	25.3	86.4	heavy	now	no	99	53	no	0	4.385	10	15	67.18	196.3	0.61	3.49	1.32	1.888	43353.617	128.7690383	6.266666667	0.28	<30	10838.40425	<60	25-30	>=90	1.3-1.8
325	1822	2011-2012	63982	1	101	69	Female	Non-Hispanic White	2.31	More than high school	32.7	122.1	former	now	yes	118	58	no	1	5.718	25	24	149.4	243.9	2.777	3.8	0.91	1.629	85278.935	30.55407517	4.322033898	-3.02	<30	21319.73375	>=60	>=30	<60	>=1.8
326	1824	2011-2012	63984	3	91	24	Male	Other Race	2.04	More than high school	24	81.1	heavy	never	no	116	69	no	0	5.218	9	18	88.4	398.5	1.027	4.71	1.34	2.896	84468.125	104.8770035	3.228346457	0.04	<30	21117.03125	<60	<25	>=90	>=1.8
327	1832	2011-2012	63992	2	95	44	Male	Non-Hispanic White	0.4	More than high school	40	137.5	mild	never	yes	128	77	DM	1	8.993	25	31	81.33	511.5	2.721	4.32	0.93	2.146	40027.277	100.7965708	33.49753695	-0.86	>=30	10006.81925	<60	>=30	>=90	<1.3
328	1853	2011-2012	64013	1	93	80	Male	Other Race	0.69	More than high school	27.4	105.3	never	now	yes	139	54	DM	0	8.882	40	33	100.78	410.4	0.948	4.99	1.4	3.155	22479.811	60.40045649	6.966292135	1.38	<30	5619.95275	>=60	25-30	60-90	<1.3
329	1861	2011-2012	64021	1	102	62	Female	Mexican American	4.42	More than high school	34.2	103.2	former	never	yes	126	71	no	0	5.995	29	33	71.6	267.7	1.671	5.43	1.14	3.517	34369.378	78.08741413	5	1.22	<30	8592.3445	>=60	>=30	60-90	>=1.8
330	1864	2011-2012	64024	1	94	62	Female	Non-Hispanic White	1.71	More than high school	47.2	135.8	former	never	no	129	56	no	0	4.885	13	17	64.53	279.6	0.655	5.74	1.86	3.569	201462.397	88.54867995	3.442622951	1.79	<30	50365.59925	>=60	>=30	60-90	1.3-1.8
331	1865	2011-2012	64025	2	92	31	Male	Non-Hispanic White	5	More than high school	26.5	93.7	moderate	former	no	118	79	no	0	4.441	41	57	91.94	458	0.835	5.43	1.5	3.543	207971.959	95.22077299	3.4375	-1.01	<30	51992.98975	<60	25-30	>=90	>=1.8
332	1869	2011-2012	64029	2	98	22	Male	Mexican American	1.53	High school or equivalent	32	105.4	heavy	now	no	119	76	no	0	5.995	20	19	126.41	481.8	1.389	5.38	1.27	3.465	78045.271	69.02088191	5.745341615	-6.28	<30	19511.31775	<60	>=30	60-90	1.3-1.8
333	1872	2011-2012	64032	1	103	46	Male	Mexican American	4.48	More than high school	26.8	99	moderate	never	yes	110	78	no	0	5.218	46	22	77.79	368.8	1.389	5.04	0.96	3.439	68553.514	103.0139017	4.701492537	3.79	<30	17138.3785	<60	25-30	>=90	>=1.8
334	1874	2011-2012	64034	2	96	62	Female	Mexican American	0.68	Less than high school	27.1	101.3	never	never	no	126	63	DM	1	5.884	19	16	79.56	428.3	1.626	6.54	1.84	3.957	30565.936	68.74802643	806.5789474	-0.53	>=30	7641.484	>=60	25-30	60-90	<1.3
335	1876	2011-2012	64036	1	98	69	Male	Non-Hispanic White	1.93	More than high school	30.3	120.1	former	former	yes	149	66	DM	1	6.106	13	22	112.27	463.9	1.603	3.96	1.27	1.965	62992.768	57.26611936	62.5	-2.32	>=30	15748.192	>=60	>=30	<60	>=1.8
336	1877	2011-2012	64037	2	95	28	Male	Other Race	5	More than high school	29.1	97.2	heavy	never	no	119	84	no	0	5.218	23	21	79.56	327.1	1.411	4.78	1.14	3	27939.644	115.8238697	6.576576577	0.71	<30	6984.911	<60	25-30	>=90	>=1.8
337	1882	2011-2012	64042	2	94	39	Male	Non-Hispanic White	1.16	Less than high school	26.9	92.5	mild	never	yes	127	83	no	0	5.107	32	28	106.08	499.6	2.224	4.86	0.93	2.922	40697.697	75.71621076	5.923076923	-4.6	<30	10174.42425	<60	25-30	60-90	<1.3
338	1886	2011-2012	64046	2	91	39	Female	Non-Hispanic Black	0.81	Less than high school	31.8	112.1	heavy	now	yes	110	75	no	1	4.885	25	21	65.42	368.8	2.224	4.4	0.93	2.457	82178.039	118.0187908	689.4736842	-0.85	>=30	20544.50975	<60	>=30	>=90	<1.3
339	1887	2011-2012	64047	1	102	34	Female	Non-Hispanic White	2.42	More than high school	31.5	95	mild	never	no	107	74	no	0	5.051	15	17	53.04	303.3	0.734	5.43	1.34	3.75	124147.922	119.3060411	10.72463768	-2.28	<30	31036.9805	<60	>=30	>=90	>=1.8
340	1895	2011-2012	64055	1	96	59	Female	Non-Hispanic Black	1.02	High school or equivalent	39.1	116.1	moderate	never	no	135	57	DM	1	6.55	23	24	64.53	446.1	2.721	7.32	1.4	4.681	34840.02	104.2509309	44.23963134	-3.09	>=30	8710.005	<60	>=30	>=90	<1.3
341	1899	2011-2012	64059	2	97	68	Female	Non-Hispanic Black	0.22	High school or equivalent	22.1	90.2	never	now	yes	146	78	preDM	0	5.607	17	22	70.72	291.5	1.716	6.18	1.4	4.008	56552.987	87.60819282	4.534883721	-4.99	<30	14138.24675	>=60	<25	60-90	<1.3
342	1905	2011-2012	64065	1	93	46	Male	Non-Hispanic White	5	More than high school	29.3	105.6	former	never	no	132	80	no	0	5.718	25	29	84.86	273.6	0.79	5.35	1.42	3.569	208021.094	94.40561301	4.583333333	5.04	<30	52005.2735	<60	25-30	>=90	>=1.8
343	1911	2011-2012	64071	2	101	67	Male	Non-Hispanic Black	0.89	Less than high school	27.1	97.6	former	never	yes	126	75	DM	0	6.051	29	25	88.4	404.5	0.971	3.67	1.5	1.733	26234.96	89.63269353	17.53424658	-5.76	<30	6558.74	>=60	25-30	60-90	<1.3
344	1912	2011-2012	64072	3	91	50	Female	Mexican American	0.89	Less than high school	33.9	110	never	never	no	99	49	preDM	0	5.829	21	19	50.39	243.9	1.344	4.22	1.37	2.224	51744.963	108.4374621	8.229166667	7.28	<30	12936.24075	<60	>=30	>=90	<1.3
345	1926	2011-2012	64086	1	96	45	Female	Other Race	4.1	More than high school	21.2	74.8	heavy	never	yes	124	80	preDM	0	5.607	11	12	65.42	237.9	0.982	4.84	1.91	2.483	60156.496	98.15242989	11.6	0.4	<30	15039.124	<60	<25	>=90	>=1.8
346	1929	2011-2012	64089	1	96	54	Female	Other Race	5	More than high school	32.8	114.3	mild	never	no	134	80	no	1	5.995	17	18	98.12	267.7	0.519	5.53	1.99	3.31	37889.612	56.43518589	5.056818182	-2.34	<30	9472.403	<60	>=30	<60	>=1.8
347	1935	2011-2012	64095	2	102	37	Male	Non-Hispanic White	4.93	More than high school	31.1	106.2	mild	never	no	115	69	no	0	5.051	38	28	107.85	309.3	1.671	6.75	1.22	4.758	249102.072	75.2681888	2.881355932	6.3	<30	62275.518	<60	>=30	60-90	>=1.8
348	1951	2011-2012	64111	2	90	33	Female	Non-Hispanic Black	0.14	Less than high school	33.1	112	moderate	now	yes	114	58	preDM	0	5.884	20	28	76.91	273.6	0.881	4.63	1.09	3.129	67991.371	101.2227291	3.487394958	40.17	<30	16997.84275	<60	>=30	>=90	<1.3
349	1953	2011-2012	64113	1	95	80	Female	Non-Hispanic White	0.96	More than high school	30.6	117.7	former	never	yes	134	64	DM	1	7.605	12	17	63.65	333.1	2.111	4.5	1.42	2.121	75745.543	79.34341957	33.15789474	-1.36	>=30	18936.38575	>=60	>=30	60-90	<1.3
350	1967	2011-2012	64127	2	102	69	Female	Other Race	1.68	More than high school	30.1	103.7	never	never	yes	107	51	DM	1	9.659	25	24	91.94	434.2	1.366	4.01	1.03	2.353	44059.403	54.95293104	13.82716049	-2.27	<30	11014.85075	>=60	>=30	<60	1.3-1.8
351	1973	2011-2012	64133	2	95	36	Female	Non-Hispanic White	2.17	More than high school	22.1	78.8	former	former	no	113	59	no	0	4.552	11	18	51.27	297.4	1.592	4.53	1.53	2.276	134058.325	118.9610759	10.25641026	-4.22	<30	33514.58125	<60	<25	>=90	>=1.8
352	1987	2011-2012	64147	3	92	34	Female	Mexican American	0.51	Less than high school	25.5	86.4	never	never	no	102	59	no	0	4.496	13	18	44.2	166.5	0.847	4.71	1.34	2.974	108984.462	126.6814614	3.725490196	8.58	<30	27246.1155	<60	25-30	>=90	<1.3
353	1997	2011-2012	64157	2	91	68	Female	Non-Hispanic White	2.03	More than high school	19.7	70.2	mild	never	no	131	70	preDM	0	5.995	19	31	61.88	202.2	0.723	5.72	2.46	2.922	290066.63	89.31232389	5.892857143	0.19	<30	72516.6575	>=60	<25	60-90	>=1.8
354	1998	2011-2012	64158	2	97	27	Male	Non-Hispanic Black	3.67	More than high school	26.1	92.5	moderate	now	no	122	69	no	0	5.384	26	30	93.7	422.3	1.016	5.48	1.47	3.543	58942.311	110.6373377	5.706371191	-3.34	<30	14735.57775	<60	25-30	>=90	>=1.8
355	2001	2011-2012	64161	1	96	51	Female	Non-Hispanic Black	5	More than high school	59	144.4	mild	former	yes	115	92	DM	0	6.051	12	20	59.23	380.7	0.621	4.65	1.84	2.534	38934.266	117.7005267	13.4939759	-2.78	<30	9733.5665	<60	>=30	>=90	>=1.8
356	2003	2011-2012	64163	2	100	48	Male	Other Race	5	More than high school	30.3	98.6	never	never	no	134	84	preDM	0	4.885	35	28	76.91	416.4	2.631	4.97	1.06	2.689	28134.918	102.0550028	10.17857143	0.01	<30	7033.7295	<60	>=30	>=90	>=1.8
357	2007	2011-2012	64167	2	101	21	Female	Other Race	0.14	More than high school	17.1	65.6	mild	never	no	93	66	no	0	4.829	13	18	52.16	232	0.847	3.72	1.68	1.655	40739.228	131.4388207	16.25	5.5	<30	10184.807	<60	<25	>=90	<1.3
358	2019	2011-2012	64179	2	98	52	Male	Mexican American	1.63	Less than high school	31.9	106.4	former	never	no	96	80	DM	0	9.159	35	23	68.95	315.2	3.76	4.91	0.8	2.379	56134.027	103.7821884	4.920634921	0.12	<30	14033.50675	<60	>=30	>=90	1.3-1.8
359	2034	2011-2012	64194	1	99	63	Female	Non-Hispanic Black	5	More than high school	30.2	93.5	mild	former	no	122	70	preDM	0	6.217	18	25	82.21	243.9	0.61	4.73	1.66	2.793	38382.239	75.63771298	11.77664975	4.08	<30	9595.55975	>=60	>=30	60-90	>=1.8
360	2038	2011-2012	64198	2	90	76	Female	Non-Hispanic Black	0.92	High school or equivalent	31.4	104.8	former	former	no	114	58	DM	0	6.495	11	11	49.5	392.6	0.948	5.17	1.19	3.543	32503.51	104.7452573	5	-0.98	<30	8125.8775	>=60	>=30	>=90	<1.3
361	2043	2011-2012	64203	1	101	35	Male	Non-Hispanic White	0.47	Less than high school	28.1	98.7	heavy	now	no	123	69	no	0	5.384	35	30	53.92	267.7	0.553	4.6	1.76	2.586	37734.765	129.3796343	5.263157895	10.02	<30	9433.69125	<60	25-30	>=90	<1.3
362	2062	2011-2012	64222	3	91	39	Male	Non-Hispanic White	3.51	More than high school	24.9	92.1	mild	never	no	122	76	no	0	5.384	22	23	99.01	446.1	1.569	5.4	1.22	3.465	271929.593	82.30276172	5.24822695	-0.18	<30	67982.39825	<60	<25	60-90	>=1.8
363	2068	2011-2012	64228	2	91	44	Male	Non-Hispanic White	5	High school or equivalent	37	121.7	heavy	former	no	129	82	DM	0	14.322	27	19	74.26	285.5	4.211	6.13	1.03	3.155	353617.915	106.488064	29.52380952	12.67	<30	88404.47875	<60	>=30	>=90	>=1.8
364	2071	2011-2012	64231	2	98	68	Male	Other Race	2.1	Less than high school	35.8	122.2	former	former	yes	94	61	DM	1	14.044	32	22	122.88	362.8	1.264	3.75	1.22	1.965	19334.021	51.70616298	11.95876289	-3.8	<30	4833.50525	>=60	>=30	<60	>=1.8
365	2074	2011-2012	64234	2	102	29	Male	Mexican American	3.92	More than high school	38.6	127.5	heavy	never	no	115	67	no	0	5.051	155	149	82.21	523.4	0.745	5.07	1.22	3.517	116552.09	110.5428426	14.375	2.44	<30	29138.0225	<60	>=30	>=90	>=1.8
366	2084	2011-2012	64244	1	99	40	Female	Non-Hispanic White	0.61	More than high school	23.5	80.2	mild	former	no	101	71	no	0	5.107	17	19	59.23	190.3	0.565	4.6	1.73	2.612	69631.553	110.3039531	4.888888889	1.54	<30	17407.88825	<60	<25	>=90	<1.3
367	2087	2011-2012	64247	1	92	42	Male	Mexican American	0.87	Less than high school	24.7	85.4	heavy	former	no	119	74	no	0	5.607	32	25	68.07	404.5	1.287	3.21	1.09	1.526	93307.167	111.9266571	11.06145251	-2.18	<30	23326.79175	<60	<25	>=90	<1.3
368	2092	2011-2012	64252	3	91	61	Male	Other Race	0.89	High school or equivalent	25.2	95.2	heavy	now	no	128	72	no	0	5.162	33	26	55.69	214.1	1.682	6.54	1.81	3.957	20487.151	106.3623628	13.49112426	-3.08	<30	5121.78775	>=60	25-30	>=90	<1.3
369	2101	2011-2012	64261	2	102	67	Male	Other Race	5	More than high school	24.5	91.6	former	never	yes	138	63	preDM	0	5.773	17	21	59.23	255.8	1.298	6.13	1.09	4.448	28377.97	99.42502053	3.524590164	1.23	<30	7094.4925	>=60	<25	>=90	>=1.8
370	2103	2011-2012	64263	2	97	62	Female	Mexican American	1.7	More than high school	25.7	78.3	never	never	no	118	63	no	0	5.495	14	18	60.11	208.2	1.253	5.53	1.6	3.362	21111.048	94.04976651	3.921568627	0.47	<30	5277.762	>=60	25-30	>=90	1.3-1.8
371	2106	2011-2012	64266	2	99	31	Male	Non-Hispanic White	5	More than high school	26.5	95.6	mild	never	yes	115	63	no	0	5.551	28	26	126.41	309.3	0.734	4.73	1.16	3.233	220586.49	64.79235129	4.659090909	1.74	<30	55146.6225	<60	25-30	60-90	>=1.8
372	2110	2011-2012	64270	1	101	47	Female	Other Race	1.15	More than high school	42	123.5	heavy	now	yes	97	67	no	1	5.051	30	24	71.6	368.8	1.942	6.31	1.4	4.034	66022.313	86.76454905	60.70175439	4.36	>=30	16505.57825	<60	>=30	60-90	<1.3
373	2121	2011-2012	64281	2	93	44	Male	Other Race	3.52	More than high school	36.6	119.7	moderate	never	yes	132	66	no	0	5.662	41	31	70.72	356.9	1.434	4.89	1.11	3.129	72600.825	108.6449972	6.1875	-1	<30	18150.20625	<60	>=30	>=90	>=1.8
374	2130	2011-2012	64290	1	99	65	Female	Non-Hispanic Black	2.07	More than high school	35.6	122.5	never	never	yes	132	76	preDM	0	6.106	14	17	66.3	362.8	0.519	4.42	1.5	2.689	38116.495	96.73501496	15.38461538	-4.2	<30	9529.12375	>=60	>=30	>=90	>=1.8
375	2138	2011-2012	64298	2	99	68	Female	Non-Hispanic Black	4.76	More than high school	33.5	106.2	former	never	yes	135	NA	preDM	0	5.051	14	17	66.3	416.4	1.129	7.09	1.68	4.888	41583.558	94.71776652	4.857142857	-0.67	<30	10395.8895	>=60	>=30	>=90	>=1.8
376	2148	2011-2012	64308	2	100	31	Female	Other Race	0.76	Less than high school	27.9	85.4	moderate	never	no	87	57	no	0	4.774	11	16	46.85	220.1	0.395	3.9	1.84	1.888	81264.468	126.9228132	24.2	0.46	<30	20316.117	<60	25-30	>=90	<1.3
377	2153	2011-2012	64313	2	102	65	Male	Mexican American	4.59	High school or equivalent	25.8	95.7	mild	never	yes	152	91	preDM	0	5.329	22	18	101.66	380.7	1.874	4.47	1.14	2.483	30469.644	66.40729187	5.255474453	0.14	<30	7617.411	>=60	25-30	60-90	>=1.8
378	2155	2011-2012	64315	1	101	52	Female	Non-Hispanic White	1.31	Less than high school	24.9	91	heavy	never	no	130	69	no	0	5.329	11	18	72.49	327.1	1.4	5.51	1.47	3.388	366629.126	82.53649016	8.409090909	-5.32	<30	91657.2815	<60	<25	60-90	1.3-1.8
379	2165	2011-2012	64325	2	98	44	Male	Non-Hispanic White	4.16	High school or equivalent	28.9	105.3	former	never	no	123	85	preDM	0	6.162	26	21	85.75	368.8	1.377	5.61	1.32	3.672	217028.884	94.54927731	4.153846154	-2.73	<30	54257.221	<60	25-30	>=90	>=1.8
380	2166	2011-2012	64326	2	92	29	Male	Non-Hispanic White	5	More than high school	18.8	77	mild	never	no	100	65	no	1	5.162	20	29	82.21	345	0.508	4.29	1.63	2.431	217895.028	110.5428426	47.78947368	9.82	>=30	54473.757	<60	<25	>=90	>=1.8
381	2169	2011-2012	64329	1	91	80	Male	Non-Hispanic White	4.27	More than high school	34.9	128.5	mild	former	no	125	69	no	0	5.607	18	26	82.21	315.2	0.519	4.53	1.24	3.051	84834.082	77.25779367	21.77777778	0.28	<30	21208.5205	>=60	>=30	60-90	>=1.8
382	2173	2011-2012	64333	2	96	46	Male	Other Race	1.84	High school or equivalent	26.4	86.3	mild	never	no	96	61	no	0	5.662	22	21	71.6	226	1.964	5.38	1.53	2.948	46640.503	106.5837195	2.045454545	-0.36	<30	11660.12575	<60	25-30	>=90	>=1.8
383	2176	2011-2012	64336	1	94	31	Male	Non-Hispanic White	1.21	Less than high school	30.5	112	heavy	now	yes	120	77	no	0	4.885	25	22	66.3	404.5	0.881	3.67	1.09	2.172	49433.792	122.2332356	5.806451613	-2.09	<30	12358.448	<60	>=30	>=90	<1.3
384	2183	2011-2012	64343	2	91	63	Male	Non-Hispanic White	4.2	Less than high school	32.4	108	former	former	yes	150	76	DM	0	5.551	14	21	60.11	297.4	1.964	4.14	1.16	2.069	191651.623	101.6375707	5.119047619	13.11	<30	47912.90575	>=60	>=30	>=90	>=1.8
385	2185	2011-2012	64345	2	92	21	Male	Other Race	0.18	More than high school	20.6	80.7	heavy	never	no	111	64	no	0	5.773	18	29	89.28	315.2	0.914	4.22	1.29	2.508	51544.123	105.8298021	2.475247525	0.48	<30	12886.03075	<60	<25	>=90	<1.3
386	2207	2011-2012	64367	1	97	39	Female	Other Race	5	More than high school	23.3	79.8	mild	never	no	110	67	no	0	5.329	18	20	60.11	392.6	1.535	5.4	1.14	3.569	58100.136	110.5414116	5	-3.38	<30	14525.034	<60	<25	>=90	>=1.8
387	2210	2011-2012	64370	2	93	25	Male	Non-Hispanic White	1.25	More than high school	21.6	75.9	never	never	no	130	77	no	0	5.384	21	19	70.72	249.8	1.016	4.63	1.42	2.741	70016.812	124.1578009	4.583333333	2.33	<30	17504.203	<60	<25	>=90	<1.3
388	2216	2011-2012	64376	1	95	58	Male	Non-Hispanic White	0.65	High school or equivalent	22.5	91.6	mild	now	yes	136	73	no	0	5.495	16	14	82.21	267.7	1.027	4.32	0.96	2.896	76972.595	90.1693283	3.58974359	-4.31	<30	19243.14875	<60	<25	>=90	<1.3
389	2219	2011-2012	64379	2	101	20	Female	Non-Hispanic Black	1.15	More than high school	25	77.7	heavy	never	no	104	69	no	0	4.718	17	22	66.3	208.2	0.847	6.03	2.02	3.62	77931.093	132.6989605	3.430962343	0.45	<30	19482.77325	<60	25-30	>=90	<1.3
390	2221	2011-2012	64381	2	94	61	Female	Non-Hispanic White	5	More than high school	24	87.4	mild	never	no	116	72	no	1	4.774	20	25	60.11	333.1	0.813	4.29	1.55	2.379	309585.403	94.7127558	43.33333333	1.71	>=30	77396.35075	>=60	<25	>=90	>=1.8
391	2222	2011-2012	64382	2	101	24	Male	Other Race	0.22	More than high school	17.8	68.2	moderate	never	no	101	56	no	0	5.107	22	19	71.6	327.1	1.061	4.68	1.53	2.664	33234.373	124.3962834	3.975903614	-0.61	<30	8308.59325	<60	<25	>=90	<1.3
392	2230	2011-2012	64390	2	99	45	Female	Non-Hispanic Black	0.78	High school or equivalent	34.2	100.9	moderate	now	yes	144	88	DM	0	5.44	12	16	44.2	190.3	1.355	4.68	1.16	2.896	39372.394	135.1762499	8.152866242	-4.56	<30	9843.0985	<60	>=30	>=90	<1.3
393	2231	2011-2012	64391	1	99	26	Female	Other Race	2.75	More than high school	21.7	78.2	moderate	never	no	102	78	no	0	4.885	15	22	69.84	249.8	0.485	3.67	1.66	1.784	95620.435	103.6418914	1.458333333	10.2	<30	23905.10875	<60	<25	>=90	>=1.8
394	2239	2011-2012	64399	2	94	45	Female	Non-Hispanic White	0.95	More than high school	25.4	84.8	former	never	no	117	71	no	0	5.718	12	23	69.84	321.2	1.027	5.97	1.99	3.517	80971.92	90.6924327	4.844720497	-2.48	<30	20242.98	<60	25-30	>=90	<1.3
395	2257	2011-2012	64417	1	98	20	Female	Non-Hispanic White	5	More than high school	21.9	77.8	heavy	never	no	116	64	no	0	5.329	39	33	68.07	291.5	0.655	4.06	1.42	2.327	307422.302	111.5074041	7.636363636	6.23	<30	76855.5755	<60	<25	>=90	>=1.8
396	2259	2011-2012	64419	3	92	63	Female	Mexican American	1.26	Less than high school	45	125.9	former	former	yes	148	60	DM	0	6.939	19	16	61.88	386.6	1.829	5.3	1.34	3.129	43258.992	92.50498718	4.693877551	2.61	<30	10814.748	>=60	>=30	>=90	<1.3
397	2267	2011-2012	64427	2	101	37	Male	Non-Hispanic White	5	More than high school	36.5	121.2	mild	never	no	111	72	no	0	5.329	21	15	77.79	386.6	0.723	3.65	1.47	1.836	239271.115	109.7368779	2.5	4.86	<30	59817.77875	<60	>=30	>=90	>=1.8
398	2273	2011-2012	64433	1	99	80	Male	Non-Hispanic White	1.12	Less than high school	23.1	90.5	mild	never	yes	95	64	no	0	5.773	15	26	91.94	291.5	0.835	3.1	1.22	1.5	17269.082	67.49084707	6.279863481	-3	<30	4317.2705	>=60	<25	60-90	<1.3
399	2276	2011-2012	64436	2	90	34	Female	Other Race	3.45	More than high school	28.4	95.2	mild	never	no	97	70	no	0	5.051	13	17	58.34	285.5	1.784	5.15	1.4	2.922	68293.94	115.6230021	9.166666667	-3.79	<30	17073.485	<60	25-30	>=90	>=1.8
400	2277	2011-2012	64437	2	95	21	Female	Non-Hispanic Black	0.33	Less than high school	29.3	97.1	moderate	now	no	105	52	no	0	4.885	13	15	68.07	362.8	0.621	3.7	1.24	2.172	64732.028	127.6434547	4.302788845	-1.67	<30	16183.007	<60	25-30	>=90	<1.3
401	2279	2011-2012	64439	2	98	53	Male	Non-Hispanic White	5	More than high school	26.3	97.3	mild	never	yes	125	79	no	0	5.607	34	27	93.7	452	4.098	7.29	1.06	4.344	306816.763	79.72851694	8.490566038	-1.46	<30	76704.19075	<60	25-30	60-90	>=1.8
402	2313	2011-2012	64473	2	101	79	Male	Non-Hispanic Black	2.04	High school or equivalent	30	100	former	never	yes	146	58	DM	0	6.273	26	32	103.43	475.8	0.756	4.29	1.47	2.483	31518.45	68.14291733	4.454148472	-1.27	<30	7879.6125	>=60	>=30	60-90	>=1.8
403	2315	2011-2012	64475	3	90	62	Male	Other Race	3.21	High school or equivalent	25.8	94.7	mild	former	no	129	63	DM	0	8.604	16	18	79.56	273.6	0.847	4.91	1.32	3.207	16290.027	91.21631415	3.251533742	0.09	<30	4072.50675	>=60	25-30	>=90	>=1.8
404	2325	2011-2012	64485	1	100	32	Male	Other Race	0.39	Less than high school	35.4	111.5	moderate	never	no	120	66	preDM	0	6.328	28	22	91.94	232	1.648	5.12	0.88	3.491	78780.457	94.55422758	2.692307692	-0.58	<30	19695.11425	<60	>=30	>=90	<1.3
405	2334	2011-2012	64494	2	95	39	Female	Non-Hispanic Black	4.1	More than high school	38.7	109.1	former	never	yes	144	88	preDM	0	6.495	22	19	53.04	178.4	0.497	5.59	0.93	4.422	65583.608	132.7866068	7.54601227	2.12	<30	16395.902	<60	>=30	>=90	>=1.8
406	2337	2011-2012	64497	1	94	60	Male	Non-Hispanic White	1.39	Less than high school	32.7	112.1	former	former	yes	143	96	DM	1	6.384	38	30	131.72	410.4	3.206	10.29	1.32	7.499	55903.226	50.2887705	6.258503401	-5.01	<30	13975.8065	>=60	>=30	<60	1.3-1.8
407	2338	2011-2012	64498	3	91	47	Female	Other Race	5	More than high school	20.8	79.2	mild	never	no	105	66	preDM	0	5.162	24	26	50.39	154.6	0.779	5.2	1.99	2.845	44871.929	110.7469053	6.976744186	-0.95	<30	11217.98225	<60	<25	>=90	>=1.8
408	2340	2011-2012	64500	2	92	29	Female	Non-Hispanic White	5	More than high school	22.5	72.3	moderate	former	no	117	72	no	0	5.329	23	29	73.37	178.4	0.7	4.91	2.25	2.353	238976.105	95.5980019	3.666666667	-0.7	<30	59744.02625	<60	<25	>=90	>=1.8
409	2344	2011-2012	64504	2	99	57	Female	Non-Hispanic Black	1.34	More than high school	25.3	84.5	former	now	yes	142	88	no	0	4.774	37	46	60.11	345	0.937	5.09	1.66	3	37116.813	112.2941353	10.8	-0.68	<30	9279.20325	<60	25-30	>=90	1.3-1.8
410	2365	2011-2012	64525	1	94	21	Female	Non-Hispanic White	1.47	More than high school	19.9	70	never	never	no	107	56	no	0	5.107	25	27	70.72	184.4	1.129	4.91	1.47	2.922	103368.017	105.7266439	4.031413613	1.17	<30	25842.00425	<60	<25	>=90	1.3-1.8
411	2366	2011-2012	64526	1	100	49	Female	Non-Hispanic White	1.95	More than high school	39.5	125.7	moderate	never	no	136	79	preDM	0	6.217	34	25	64.53	226	1.987	5.59	1.03	3.646	335315.194	97.01566409	10.68181818	-0.01	<30	83828.7985	<60	>=30	>=90	>=1.8
412	2376	2011-2012	64536	1	101	75	Female	Non-Hispanic White	5	Less than high school	28.1	97	never	never	yes	143	68	DM	1	7.05	25	26	62.76	315.2	1.535	4.37	1.32	2.353	139668.385	83.58114494	36.9	2.18	>=30	34917.09625	>=60	25-30	60-90	>=1.8
413	2384	2011-2012	64544	2	100	69	Male	Other Race	4.59	More than high school	29.7	102.4	mild	never	no	112	74	no	0	5.773	27	33	76.02	339	1.185	5.59	1.34	3.698	13158.436	88.4773419	4.79338843	2.38	<30	3289.609	>=60	25-30	60-90	>=1.8
414	2398	2011-2012	64558	1	97	62	Male	Non-Hispanic Black	3.93	More than high school	29.6	107.3	former	former	yes	146	88	no	0	5.495	19	18	68.07	261.7	0.655	3.47	1.11	2.043	29060.366	112.4312384	6.043165468	5.8	<30	7265.0915	>=60	25-30	>=90	>=1.8
415	2399	2011-2012	64559	1	95	70	Female	Non-Hispanic White	2.45	High school or equivalent	39.4	132.2	mild	former	yes	128	69	DM	1	11.269	14	21	90.17	577	2.145	3.62	0.93	1.707	162662.27	55.86448629	10.90909091	-3.44	<30	40665.5675	>=60	>=30	<60	>=1.8
416	2407	2011-2012	64567	1	100	37	Male	Other Race	4.34	More than high school	23.1	91	mild	former	no	113	68	no	0	5.773	30	27	76.02	380.7	1.919	5.46	1.03	3.543	74910.548	110.7786619	6.25	-2	<30	18727.637	<60	<25	>=90	>=1.8
417	2431	2011-2012	64591	3	92	51	Male	Non-Hispanic Black	1.22	Less than high school	26.4	92.4	former	former	yes	139	66	no	0	6.106	18	19	79.56	446.1	0.666	6.34	1.24	4.784	61638.898	113.9198167	8.176100629	-2.9	<30	15409.7245	<60	25-30	>=90	<1.3
418	2432	2011-2012	64592	1	91	29	Female	Mexican American	2.1	High school or equivalent	32.6	97.7	heavy	never	no	98	63	no	0	5.773	46	40	53.04	273.6	1.592	4.09	0.93	2.431	119806.372	123.570895	7.107438017	2.73	<30	29951.593	<60	>=30	>=90	>=1.8
419	2442	2011-2012	64602	2	94	59	Female	Mexican American	5	More than high school	23.3	84.3	mild	former	no	128	71	no	0	5.162	19	21	59.23	261.7	2.71	7.55	1.4	4.913	46958.495	96.52210806	4.615384615	-1.23	<30	11739.62375	<60	<25	>=90	>=1.8
420	2451	2011-2012	64611	2	100	50	Male	Non-Hispanic Black	3.06	More than high school	45.8	137	former	never	no	109	60	DM	0	6.828	36	29	73.37	440.2	1.231	4.14	1.09	2.483	36659.185	118.6048926	4.393939394	1.09	<30	9164.79625	<60	>=30	>=90	>=1.8
421	2461	2011-2012	64621	1	100	38	Male	Other Race	4.71	More than high school	26.9	104	mild	former	yes	142	91	no	0	4.996	43	27	71.6	327.1	2.179	6.23	1.14	4.086	73210.343	112.7448944	7.636363636	1.21	<30	18302.58575	<60	25-30	>=90	>=1.8
422	2465	2011-2012	64625	1	96	69	Male	Non-Hispanic Black	1.39	Less than high school	26	95.8	former	never	yes	159	70	DM	0	7.383	16	20	90.17	237.9	0.881	3.93	1.34	2.172	19142.345	86.29136458	20.91503268	-3.26	<30	4785.58625	>=60	25-30	60-90	1.3-1.8
423	2472	2011-2012	64632	2	91	21	Male	Other Race	4.63	High school or equivalent	30.6	101.6	heavy	now	no	132	62	no	0	5.273	20	18	94.59	428.3	0.824	2.82	1.01	1.422	103756.369	98.69781489	3.125	0.64	<30	25939.09225	<60	>=30	>=90	>=1.8
424	2479	2011-2012	64639	1	92	58	Male	Non-Hispanic Black	3.7	Less than high school	43.1	132.2	mild	former	yes	119	67	DM	0	7.938	29	23	97.24	386.6	3.929	4.01	1.01	1.19	71317.831	85.09018242	5.555555556	4.21	<30	17829.45775	<60	>=30	60-90	>=1.8
425	2486	2011-2012	64646	1	91	80	Male	Non-Hispanic White	2.68	More than high school	25.8	95	mild	former	yes	147	54	no	1	5.551	33	38	95.47	368.8	1.434	3.31	0.88	1.784	77515.84	64.48056969	76.84210526	1.52	>=30	19378.96	>=60	25-30	60-90	>=1.8
426	2488	2011-2012	64648	1	103	36	Male	Mexican American	5	More than high school	20.5	74.2	mild	never	no	108	74	no	0	5.162	19	20	83.98	249.8	0.756	4.19	1.5	2.353	71345.616	102.5659988	6.184210526	13.91	<30	17836.404	<60	<25	>=90	>=1.8
427	2504	2011-2012	64664	1	98	48	Female	Non-Hispanic White	1.26	More than high school	36.3	105	never	never	yes	131	91	no	0	5.162	15	18	66.3	226	0.756	4.32	1.32	2.664	97343.61	94.55856717	15.90909091	2.9	<30	24335.9025	<60	>=30	>=90	<1.3
428	2509	2011-2012	64669	2	95	60	Female	Non-Hispanic White	2.95	High school or equivalent	23.5	85.3	never	never	no	136	86	no	0	5.384	24	29	62.76	273.6	0.802	5.04	2.22	2.457	73163.517	92.86874755	13.61111111	-2.92	<30	18290.87925	>=60	<25	>=90	>=1.8
429	2512	2011-2012	64672	2	100	22	Male	Non-Hispanic Black	1.38	More than high school	26.6	79.6	mild	never	no	115	57	no	0	4.663	48	42	100.78	160.6	0.644	2.07	0.36	1.422	60518.144	104.942716	11.37254902	5.27	<30	15129.536	<60	25-30	>=90	1.3-1.8
430	2519	2011-2012	64679	1	91	38	Female	Other Race	1.57	Less than high school	25	77	mild	never	yes	143	67	no	0	4.607	14	17	57.46	267.7	0.7	4.78	1.53	2.948	43629.776	112.9854958	11.44329897	-1.5	<30	10907.444	<60	25-30	>=90	1.3-1.8
431	2522	2011-2012	64682	1	94	42	Male	Non-Hispanic White	2.96	High school or equivalent	32.5	107.2	heavy	never	yes	130	78	DM	0	5.162	36	22	65.42	380.7	2.168	5.82	1.09	3.75	329709.904	113.7697972	5.683453237	0.78	<30	82427.476	<60	>=30	>=90	>=1.8
432	2527	2011-2012	64687	2	93	24	Female	Non-Hispanic Black	0.56	More than high school	25.8	86.8	heavy	never	no	108	68	no	0	6.051	18	19	71.6	321.2	1.027	4.24	1.24	2.534	47119.662	117.5588136	2.857142857	0.56	<30	11779.9155	<60	25-30	>=90	<1.3
433	2529	2011-2012	64689	2	103	42	Female	Mexican American	0.79	Less than high school	26.2	85.6	never	never	no	112	77	no	0	5.329	12	30	59.23	160.6	1.637	5.66	1.34	3.569	61044.867	108.7651026	4.545454545	-0.49	<30	15261.21675	<60	25-30	>=90	<1.3
434	2543	2011-2012	64703	2	90	22	Female	Other Race	1.19	More than high school	25.3	90	mild	former	no	108	66	no	0	5.107	11	21	54.81	208.2	0.531	3.18	1.6	1.345	82529.907	128.4063048	4.310344828	3.03	<30	20632.47675	<60	25-30	>=90	<1.3
435	2546	2011-2012	64706	2	93	20	Female	Non-Hispanic Black	1.47	More than high school	32.5	100	never	never	no	129	76	no	0	4.774	12	21	61	273.6	0.734	3.85	1.16	2.353	44898.943	144.9268865	10.83333333	-3.35	<30	11224.73575	<60	>=30	>=90	1.3-1.8
436	2560	2011-2012	64720	1	100	29	Male	Non-Hispanic Black	1.61	More than high school	20.6	74.2	moderate	now	no	127	60	DM	0	19.04	13	13	73.37	214.1	1.897	4.76	0.93	2.948	53909.937	137.4574827	26.41509434	4.05	<30	13477.48425	<60	<25	>=90	1.3-1.8
437	2561	2011-2012	64721	2	100	56	Male	Non-Hispanic Black	1.08	Less than high school	31.4	114.1	heavy	now	yes	105	50	DM	1	13.711	20	20	73.37	345	1.242	4.5	1.03	2.896	35665.143	113.7098523	61.67979003	-3.62	>=30	8916.28575	<60	>=30	>=90	<1.3
438	2562	2011-2012	64722	2	102	33	Female	Mexican American	1.33	Less than high school	25	75	moderate	never	no	120	59	no	0	5.384	13	13	44.2	202.2	0.677	4.09	1.14	2.638	86716.288	127.5744828	11.53846154	5.01	<30	21679.072	<60	25-30	>=90	1.3-1.8
439	2565	2011-2012	64725	2	91	39	Female	Non-Hispanic White	4.48	More than high school	34.3	110.4	mild	never	no	132	77	no	0	4.496	19	20	65.42	273.6	0.835	5.64	1.55	3.698	214706.045	102.3777462	7.684210526	8.53	<30	53676.51125	<60	>=30	>=90	>=1.8
440	2566	2011-2012	64726	2	95	55	Male	Non-Hispanic Black	1.85	Less than high school	26	101.2	former	former	yes	121	65	no	0	5.495	13	19	103.43	368.8	1.005	3.72	1.63	1.629	56759.533	80.65638604	3.375	-2.81	<30	14189.88325	<60	25-30	60-90	>=1.8
441	2574	2011-2012	64734	2	95	68	Female	Non-Hispanic Black	1.32	More than high school	32.4	111.6	heavy	now	yes	141	52	DM	0	6.717	20	20	63.65	232	1.592	5.69	1.47	3.491	46652.981	99.50972543	7.682119205	2.84	<30	11663.24525	>=60	>=30	>=90	1.3-1.8
442	2582	2011-2012	64742	2	100	56	Male	Non-Hispanic Black	1.74	High school or equivalent	38	116.8	mild	never	no	126	74	DM	0	6.883	26	39	111.38	339	0.869	3.93	0.98	2.56	45667.498	73.22792449	7.455012853	8.61	<30	11416.8745	<60	>=30	60-90	1.3-1.8
443	2586	2011-2012	64746	2	99	29	Male	Non-Hispanic Black	4.34	More than high school	30.2	102.3	heavy	now	no	118	79	no	0	5.384	29	23	77.79	333.1	1.434	3.9	1.11	2.146	57867.826	134.1921478	3.316062176	-1.3	<30	14466.9565	<60	>=30	>=90	>=1.8
444	2596	2011-2012	64756	2	93	72	Male	Other Race	3.04	High school or equivalent	28	96.2	mild	never	yes	117	60	preDM	1	5.829	14	18	120.22	434.2	2.506	3.54	1.03	1.371	29616.445	51.61734449	9.806451613	8.19	<30	7404.11125	>=60	25-30	<60	>=1.8
445	2599	2011-2012	64759	2	101	80	Male	Non-Hispanic White	1.63	Less than high school	24.8	101.8	never	former	yes	149	68	preDM	0	5.495	19	26	100.78	428.3	2.563	5.84	0.98	3.698	127653.91	60.40045649	18.4079602	-4.7	<30	31913.4775	>=60	<25	60-90	1.3-1.8
446	2605	2011-2012	64765	1	101	32	Male	Non-Hispanic White	1.55	Less than high school	33.7	108.6	heavy	never	no	124	77	no	0	4.94	29	27	86.63	386.6	0.96	5.56	1.5	3.62	173866.153	101.5972454	3.945578231	0.95	<30	43466.53825	<60	>=30	>=90	1.3-1.8
447	2608	2011-2012	64768	1	94	27	Male	Non-Hispanic White	1.21	Less than high school	23.4	81.9	mild	now	no	117	42	no	0	4.774	21	30	81.33	374.7	0.734	3.57	1.01	2.224	88917.209	113.581744	4.941176471	3.15	<30	22229.30225	<60	<25	>=90	<1.3
448	2609	2011-2012	64769	2	99	51	Male	Non-Hispanic Black	0.19	High school or equivalent	26	90.1	never	never	no	132	69	preDM	0	6.273	21	25	116.69	398.5	1.05	5.3	1.03	3.776	55146.558	71.69759511	17.14285714	0.35	<30	13786.6395	<60	25-30	60-90	<1.3
449	2611	2011-2012	64771	2	96	64	Male	Mexican American	0.24	High school or equivalent	26.3	99.1	former	former	no	95	55	no	0	5.329	20	28	62.76	345	1.073	3.1	0.91	1.707	22805.287	99.15109308	7.142857143	0.5	<30	5701.32175	>=60	25-30	>=90	<1.3
450	2619	2011-2012	64779	2	100	30	Female	Non-Hispanic Black	1.79	Less than high school	48.4	129.2	mild	former	no	100	44	no	0	5.829	18	20	71.6	202.2	0.881	4.24	1.24	2.586	62318.716	112.7069469	6.233333333	-4.91	<30	15579.679	<60	>=30	>=90	1.3-1.8
451	2629	2011-2012	64789	1	99	67	Male	Non-Hispanic Black	5	More than high school	30.9	120.3	mild	former	yes	146	77	DM	0	7.05	22	22	77.79	416.4	1.061	6.15	1.34	4.319	19312.606	102.753955	3.383838384	3.01	<30	4828.1515	>=60	>=30	>=90	>=1.8
452	2642	2011-2012	64802	1	102	42	Male	Non-Hispanic Black	4.78	High school or equivalent	21.9	82	mild	never	no	115	78	no	0	4.996	20	32	104.31	309.3	0.508	4.91	1.94	2.741	85219.837	87.46411141	3.253588517	3.57	<30	21304.95925	<60	<25	60-90	>=1.8
453	2645	2011-2012	64805	2	101	38	Male	Non-Hispanic Black	0.73	Less than high school	48	142	never	never	yes	155	108	preDM	1	6.439	36	33	80.44	422.3	1.027	6.26	1.53	4.267	58408.207	123.1564602	44.55445545	6.01	>=30	14602.05175	<60	>=30	>=90	<1.3
454	2647	2011-2012	64807	2	98	35	Female	Non-Hispanic White	3.25	More than high school	26.7	88.5	mild	never	no	105	62	no	0	4.996	26	29	54.81	339	0.835	5.15	1.5	3.258	131724.57	117.1997213	6.138613861	-1.87	<30	32931.1425	<60	25-30	>=90	>=1.8
455	2656	2011-2012	64816	2	92	21	Male	Other Race	0	High school or equivalent	22.1	85	heavy	now	no	124	47	no	0	5.384	17	23	69.84	339	1.174	4.65	1.11	3	51544.123	128.3578009	4.553571429	-1.25	<30	12886.03075	<60	<25	>=90	<1.3
456	2661	2011-2012	64821	2	92	62	Male	Non-Hispanic Black	4.59	High school or equivalent	36.4	122	mild	never	no	128	81	DM	0	12.656	17	15	77.79	362.8	1.648	5.77	1.24	3.776	26691.349	106.4271186	5.03875969	-1.59	<30	6672.83725	>=60	>=30	>=90	>=1.8
457	2668	2011-2012	64828	3	92	58	Female	Mexican American	1.39	Less than high school	26.5	92.1	never	never	yes	132	82	no	0	5.051	23	30	58.34	190.3	1.253	6.54	2.02	3.957	85521.64	97.6846231	11.26984127	-0.43	<30	21380.41	<60	25-30	>=90	1.3-1.8
458	2671	2011-2012	64831	2	94	24	Male	Other Race	2.2	More than high school	26.8	87	heavy	now	no	117	75	no	0	6.106	45	69	82.21	291.5	0.813	5.69	1.6	3.724	22582.103	114.4944369	8.306451613	4.17	<30	5645.52575	<60	25-30	>=90	>=1.8
459	2672	2011-2012	64832	1	91	32	Male	Mexican American	2.1	High school or equivalent	30.5	103	heavy	never	no	107	76	preDM	0	5.329	26	24	72.49	345	1.558	6.65	1.55	4.37	87821.474	117.0068379	24.8	1.47	<30	21955.3685	<60	>=30	>=90	>=1.8
460	2673	2011-2012	64833	1	92	37	Female	Mexican American	0.87	More than high school	37.2	108.9	moderate	never	no	118	72	no	0	5.107	14	16	41.55	148.7	1.118	6.03	1.68	3.827	111778.154	126.590684	12.42647059	-0.13	<30	27944.5385	<60	>=30	>=90	<1.3
461	2679	2011-2012	64839	2	98	37	Male	Mexican American	3.25	More than high school	32	103.6	mild	never	no	122	89	DM	0	7.494	69	35	83.98	345	2.258	5.28	0.96	3.284	73845.17	101.8480368	2.727272727	3.29	<30	18461.2925	<60	>=30	>=90	>=1.8
462	2683	2011-2012	64843	2	90	50	Female	Non-Hispanic Black	0.96	Less than high school	35.2	115.4	former	now	no	122	67	no	0	5.662	15	16	56.58	255.8	1.208	6.05	1.22	4.293	29522.276	120.3301773	8.405797101	-1	<30	7380.569	<60	>=30	>=90	<1.3
463	2694	2011-2012	64854	2	90	69	Female	Other Race	1.73	Less than high school	29.4	107.7	mild	now	no	133	43	DM	0	9.77	16	19	80.44	434.2	1.931	4.58	1.22	2.483	33340.406	64.5807561	16.87830688	4.53	<30	8335.1015	>=60	25-30	60-90	1.3-1.8
464	2697	2011-2012	64857	1	98	54	Female	Non-Hispanic White	1.34	More than high school	47.7	127	mild	never	yes	127	78	DM	0	4.885	64	47	76.02	523.4	1.806	5.2	1.03	3.336	361511.846	76.831058	5.970149254	6.7	<30	90377.9615	<60	>=30	60-90	1.3-1.8
465	2699	2011-2012	64859	1	94	46	Female	Non-Hispanic White	2.43	High school or equivalent	26.5	96	moderate	now	no	105	69	no	0	5.995	56	58	58.34	255.8	1.31	5.74	1.45	3.698	323447.115	106.2760057	12.79069767	-3.13	<30	80861.77875	<60	25-30	>=90	>=1.8
466	2706	2011-2012	64866	2	96	25	Female	Non-Hispanic Black	0.4	Less than high school	25.3	84.4	moderate	now	no	129	77	no	0	5.884	17	17	53.04	267.7	0.802	4.5	1.58	2.56	41409.703	146.5091653	5.853658537	-2.57	<30	10352.42575	<60	25-30	>=90	<1.3
467	2711	2011-2012	64871	1	97	49	Female	Non-Hispanic White	3.36	More than high school	23.1	86	moderate	never	no	86	60	no	0	5.551	12	16	55.69	208.2	0.824	5.02	1.4	3.233	343819.976	105.6646899	22.85714286	-0.38	<30	85954.994	<60	<25	>=90	>=1.8
468	2713	2011-2012	64873	2	91	41	Female	Non-Hispanic White	5	More than high school	23.5	83.2	mild	never	no	99	60	no	0	4.718	19	22	79.56	345	0.847	4.55	1.58	2.586	259234.021	79.6757237	3.148148148	2.4	<30	64808.50525	<60	<25	60-90	>=1.8
469	2716	2011-2012	64876	3	91	47	Male	Non-Hispanic White	1.33	More than high school	23.7	93.5	moderate	never	no	118	76	no	0	5.829	15	17	74.26	279.6	0.655	4.5	1.86	2.327	59467.205	104.2674318	2.365591398	10.32	<30	14866.80125	<60	<25	>=90	1.3-1.8
470	2717	2011-2012	64877	2	97	46	Male	Non-Hispanic Black	0.09	High school or equivalent	32.5	111.5	mild	never	no	108	75	preDM	0	6.328	24	28	90.17	374.7	1.524	5.92	1.01	4.215	53400.429	101.4225724	26.38655462	0.95	<30	13350.10725	<60	>=30	>=90	<1.3
471	2722	2011-2012	64882	2	102	65	Male	Non-Hispanic White	5	More than high school	27.6	106.9	mild	never	no	130	83	preDM	0	5.718	18	23	99.01	285.5	0.937	5.9	1.91	3.543	338876.113	68.56379841	3.2	6.42	<30	84719.02825	>=60	25-30	60-90	>=1.8
472	2732	2011-2012	64892	2	100	21	Male	Non-Hispanic Black	1.08	More than high school	25.1	81.3	mild	never	no	111	62	no	0	4.885	10	25	87.52	297.4	0.576	3.85	1.47	2.121	62169.94	125.3366453	1.801801802	0.89	<30	15542.485	<60	25-30	>=90	<1.3
473	2733	2011-2012	64893	2	103	23	Female	Non-Hispanic White	3.44	More than high school	18.9	71.3	heavy	never	no	97	56	no	0	4.996	13	17	71.6	178.4	0.824	4.63	1.5	2.741	166745.458	102.6976131	11.05263158	-0.09	<30	41686.3645	<60	<25	>=90	>=1.8
474	2737	2011-2012	64897	2	90	42	Male	Other Race	0.81	Less than high school	20.2	82.2	heavy	never	no	105	72	no	0	5.051	19	27	72.49	291.5	0.327	4.99	1.63	3.207	31057.032	109.0696018	7.373737374	-2.76	<30	7764.258	<60	<25	>=90	<1.3
475	2738	2011-2012	64898	1	99	45	Male	Non-Hispanic Black	0.48	High school or equivalent	22.8	76	former	now	yes	132	65	no	0	5.718	12	26	85.75	273.6	0.971	3.28	0.93	1.914	57005.837	108.5365353	7.857142857	-4.38	<30	14251.45925	<60	<25	>=90	<1.3
476	2748	2011-2012	64908	1	102	60	Female	Mexican American	2.94	More than high school	27	96.2	moderate	never	no	114	48	preDM	0	6.162	29	21	45.97	214.1	1.005	4.42	1.5	2.457	32784.238	104.1812483	8.717948718	-3.93	<30	8196.0595	>=60	25-30	>=90	>=1.8
477	2754	2011-2012	64914	2	96	31	Male	Other Race	3.67	More than high school	18.9	74.7	heavy	never	no	121	79	no	0	4.829	29	21	73.37	261.7	1.535	3.9	1.19	2.017	38359.237	117.2460962	21.03448276	-1.41	<30	9589.80925	<60	<25	>=90	>=1.8
478	2756	2011-2012	64916	2	98	31	Male	Non-Hispanic White	1.01	High school or equivalent	29.1	97	heavy	now	no	123	67	no	0	5.495	55	39	88.4	362.8	0.598	3.8	1.81	1.707	34888.05	99.84469851	2.631578947	-1.88	<30	8722.0125	<60	25-30	>=90	<1.3
479	2763	2011-2012	64923	3	90	64	Female	Non-Hispanic Black	3.3	Less than high school	32.8	106	never	never	yes	130	58	DM	0	6.328	22	23	55.69	220.1	0.61	4.29	1.5	2.508	27828.421	109.6261611	11.09375	12.35	<30	6957.10525	>=60	>=30	>=90	>=1.8
480	2768	2011-2012	64928	1	92	80	Male	Non-Hispanic Black	1.3	Less than high school	21.3	79.5	mild	former	yes	157	56	preDM	0	4.829	19	29	94.59	249.8	0.542	6.88	1.91	4.707	45386.045	75.38443614	15.80110497	3.12	<30	11346.51125	>=60	<25	60-90	1.3-1.8
481	2771	2011-2012	64931	2	102	59	Female	Non-Hispanic Black	2.04	More than high school	23.2	87	former	former	yes	129	59	DM	1	6.772	74	48	556.04	380.7	3.59	3.49	0.8	1.034	69847.636	7.713804881	903.6363636	-3.75	>=30	17461.909	<60	<25	<60	>=1.8
482	2788	2011-2012	64948	2	95	61	Female	Non-Hispanic Black	1.92	More than high school	35.9	115	former	never	yes	98	68	DM	0	6.328	30	26	76.91	428.3	0.994	4.24	1.55	2.224	19762.553	83.1489942	4.953271028	0.24	<30	4940.63825	>=60	>=30	60-90	>=1.8
483	2791	2011-2012	64951	3	91	22	Male	Non-Hispanic White	1.02	More than high school	28.9	100	moderate	never	no	115	74	no	0	5.607	35	21	74.26	374.7	1.964	5.38	1.06	3.414	259006.061	124.2846416	2.160493827	4.22	<30	64751.51525	<60	25-30	>=90	<1.3
484	2793	2011-2012	64953	1	101	44	Female	Non-Hispanic White	1.12	More than high school	19.1	70.2	moderate	never	no	112	68	no	0	4.829	20	24	98.12	333.1	0.892	4.89	2.51	1.965	76445.217	60.54209914	4.025974026	0.43	<30	19111.30425	<60	<25	60-90	<1.3
485	2802	2011-2012	64962	2	102	32	Female	Non-Hispanic Black	3.25	More than high school	34.7	105	moderate	never	yes	126	71	no	0	4.885	21	24	74.26	398.5	0.485	4.94	1.6	3.103	84460.105	106.3540208	11.25	-4.85	<30	21115.02625	<60	>=30	>=90	>=1.8
486	2803	2011-2012	64963	1	96	55	Male	Non-Hispanic Black	5	More than high school	45	146.7	heavy	never	yes	119	63	DM	0	5.384	16	23	129.95	481.8	0.869	3.93	1.37	2.172	56133.374	61.20526855	6.279069767	5.57	<30	14033.3435	<60	>=30	60-90	>=1.8
487	2808	2011-2012	64968	1	96	50	Female	Non-Hispanic Black	5	More than high school	21.8	79.2	moderate	never	no	113	67	no	0	5.718	12	19	63.65	291.5	0.565	3.7	1.78	1.655	45729.27	112.9221283	12.84090909	0.19	<30	11432.3175	<60	<25	>=90	>=1.8
488	2814	2011-2012	64974	2	102	42	Female	Non-Hispanic Black	2.65	More than high school	42.3	128.1	former	never	yes	107	63	no	0	5.162	12	20	81.33	339	1.332	5.82	1.37	3.827	58725.548	88.81382448	1.651785714	-0.09	<30	14681.387	<60	>=30	60-90	>=1.8
489	2818	2011-2012	64978	1	93	56	Female	Other Race	1.43	More than high school	27.5	95.1	never	never	no	104	68	preDM	0	5.662	27	19	60.11	261.7	1.84	5.95	1.22	3.879	54138.74	98.09846928	5.555555556	9.6	<30	13534.685	<60	25-30	>=90	1.3-1.8
490	2821	2011-2012	64981	2	97	46	Male	Non-Hispanic White	0.8	More than high school	27.4	101.3	never	never	no	NA	NA	no	0	6.106	28	22	68.95	297.4	2.981	5.2	0.85	2.974	41230.75	108.2498574	9.736842105	-0.89	<30	10307.6875	<60	25-30	>=90	<1.3
491	2834	2011-2012	64994	2	92	27	Male	Non-Hispanic White	1.96	More than high school	23.9	83	mild	never	no	115	72	no	0	5.94	20	26	91.94	285.5	1.287	6.36	1.68	4.086	256347.091	97.93427412	3.089430894	5.41	<30	64086.77275	<60	<25	>=90	>=1.8
492	2838	2011-2012	64998	2	97	54	Male	Non-Hispanic White	5	More than high school	33.1	116.8	moderate	former	yes	128	100	preDM	0	6.55	30	31	76.02	404.5	1.208	3.93	0.98	2.405	285507.668	98.30901377	14.25373134	8.86	<30	71376.917	<60	>=30	>=90	>=1.8
493	2846	2011-2012	65006	1	100	47	Female	Non-Hispanic Black	3.93	More than high school	29.4	97.3	never	never	no	114	67	DM	0	5.44	11	20	73.37	309.3	1.174	5.48	1.29	3.646	55653.344	97.11378567	3.846153846	-0.94	<30	13913.336	<60	25-30	>=90	>=1.8
494	2849	2011-2012	65009	1	97	51	Female	Non-Hispanic Black	1.41	More than high school	55.8	155.9	heavy	never	yes	142	42	preDM	0	6.994	18	27	63.65	261.7	0.666	4.45	2.04	2.095	45088.619	112.1316734	4.974619289	-3.05	<30	11272.15475	<60	>=30	>=90	1.3-1.8
495	2854	2011-2012	65014	1	95	59	Female	Non-Hispanic White	4.01	High school or equivalent	33.7	109.5	moderate	never	yes	137	77	DM	0	6.828	67	68	68.95	588.9	2.777	5.95	0.88	3.801	332800.15	83.47363174	27.91208791	3.3	<30	83200.0375	<60	>=30	60-90	>=1.8
496	2862	2011-2012	65022	2	92	29	Female	Other Race	5	More than high school	21.7	72.6	mild	never	no	117	76	no	0	5.329	20	27	64.53	237.9	1.908	5.22	1.91	2.431	32668.4	111.6495279	8.313253012	1.97	<30	8167.1	<60	<25	>=90	>=1.8
497	2868	2011-2012	65028	1	101	80	Male	Non-Hispanic White	0.95	Less than high school	19.4	88.1	never	never	no	134	71	DM	0	8.549	17	23	73.37	285.5	0.802	4.94	1.71	2.87	33731.721	83.10201755	8.823529412	-0.33	<30	8432.93025	>=60	<25	60-90	<1.3
498	2872	2011-2012	65032	2	95	76	Female	Non-Hispanic White	1.95	High school or equivalent	25.8	92.6	former	former	no	118	78	no	1	5.662	16	25	86.63	327.1	1.242	4.86	1.47	2.819	178885.429	56.21297658	26.90140845	-2.24	<30	44721.35725	>=60	25-30	<60	>=1.8
499	2886	2011-2012	65046	1	90	74	Male	Non-Hispanic White	5	High school or equivalent	27.6	87.4	never	never	yes	119	57	DM	0	10.713	17	19	76.02	321.2	1.027	2.82	1.14	1.215	36983.071	85.42368641	6.548672566	-4.84	<30	9245.76775	>=60	25-30	60-90	>=1.8
500	2889	2011-2012	65049	2	103	24	Male	Other Race	2.64	High school or equivalent	23.7	80.7	heavy	never	no	108	64	no	0	5.44	17	17	91.05	356.9	1.344	3.98	1.14	2.224	72198.332	101.1952356	4.14893617	5.43	<30	18049.583	<60	<25	>=90	>=1.8
501	2892	2011-2012	65052	3	91	42	Male	Non-Hispanic White	5	More than high school	27.7	96.8	mild	never	no	124	71	no	0	5.44	28	27	76.02	309.3	2.111	6.03	1.11	3.957	214119.496	106.9553116	10.83870968	6.21	<30	53529.874	<60	25-30	>=90	>=1.8
502	2901	2011-2012	65061	1	91	38	Male	Other Race	3.22	More than high school	29.7	104.8	former	never	yes	129	95	DM	0	6.384	41	29	69.84	463.9	1.344	3.96	1.03	2.302	47921.947	113.9093811	28.97637795	-2.78	<30	11980.48675	<60	25-30	>=90	>=1.8
503	2907	2011-2012	65067	2	93	42	Female	Non-Hispanic White	3.77	More than high school	21	74	moderate	never	no	110	76	preDM	0	4.552	78	54	60.11	255.8	0.948	4.47	1.37	2.664	280643.921	108.2362537	5.735294118	0.25	<30	70160.98025	<60	<25	>=90	>=1.8
504	2909	2011-2012	65069	1	101	62	Male	Mexican American	0.41	Less than high school	24.7	79.6	former	never	no	114	63	DM	0	9.77	23	20	84.86	279.6	2.258	5.79	1.14	3.62	22257.498	84.36956162	26.17021277	-1.94	<30	5564.3745	>=60	<25	60-90	<1.3
505	2926	2011-2012	65086	1	103	46	Male	Non-Hispanic White	5	More than high school	25.8	87.3	mild	never	no	91	65	no	0	4.94	48	58	77.79	243.9	0.756	4.27	1.37	2.56	220659.044	103.0139017	5.378151261	20.08	<30	55164.761	<60	25-30	>=90	>=1.8
506	2927	2011-2012	65087	2	90	74	Female	Other Race	1.57	Less than high school	27.7	101.2	never	never	no	137	74	no	0	5.329	20	24	49.5	303.3	2.518	6.47	1.24	4.06	47970.11	92.1489254	7.441860465	-1.4	<30	11992.5275	>=60	25-30	>=90	1.3-1.8
507	2931	2011-2012	65091	1	95	33	Male	Non-Hispanic White	1.03	High school or equivalent	27.5	93.3	heavy	former	no	125	65	no	0	4.885	19	25	91.94	303.3	1.344	6.49	1.01	4.862	52540.4	93.89234799	4.088888889	-4.95	<30	13135.1	<60	25-30	>=90	<1.3
508	2938	2011-2012	65098	1	96	68	Female	Non-Hispanic Black	1.39	Less than high school	31.1	96.7	mild	never	yes	141	69	DM	0	6.55	17	21	60.11	368.8	0.35	4.47	1.76	2.56	43987.285	103.9438524	2.315789474	1.4	<30	10996.82125	>=60	>=30	>=90	1.3-1.8
509	2946	2011-2012	65106	1	96	32	Male	Non-Hispanic Black	2.69	High school or equivalent	24.2	82	mild	former	no	135	64	no	0	4.219	12	17	68.95	362.8	1.75	4.86	1.37	2.689	84045.954	138.0722321	3.757225434	1.36	<30	21011.4885	<60	<25	>=90	>=1.8
510	2969	2011-2012	65129	3	92	45	Female	Non-Hispanic Black	1.22	High school or equivalent	28.2	90.8	former	never	no	121	89	no	0	4.774	21	22	57.46	255.8	0.508	6.65	1.63	4.784	65270.965	123.9975291	9.58041958	-1.02	<30	16317.74125	<60	25-30	>=90	<1.3
511	2972	2011-2012	65132	1	97	33	Female	Mexican American	0.72	Less than high school	25.3	85.4	mild	never	no	105	64	no	0	4.607	19	18	47.74	255.8	1.061	5.53	1.68	3.362	92471.756	124.3848253	9.076923077	-4.72	<30	23117.939	<60	25-30	>=90	<1.3
512	2975	2011-2012	65135	3	91	55	Male	Other Race	5	More than high school	27.6	96.8	mild	never	yes	129	84	DM	0	7.938	25	25	78.68	410.4	1.931	5.22	1.24	3.103	34871.339	96.25474738	11.08974359	-1.52	<30	8717.83475	<60	25-30	>=90	>=1.8
513	2981	2011-2012	65141	1	97	21	Male	Mexican American	0.65	Less than high school	17.9	69.1	heavy	never	no	111	62	no	0	5.273	18	23	64.53	350.9	0.666	3.62	1.42	1.888	74431.671	132.5932168	3.737373737	-1.73	<30	18607.91775	<60	<25	>=90	<1.3
514	2983	2011-2012	65143	2	92	62	Male	Other Race	2.2	More than high school	25.2	93	never	former	no	104	61	DM	0	6.217	69	41	78.68	380.7	1.355	3.62	1.14	1.862	19518.506	91.63616341	2.934782609	-1.88	<30	4879.6265	>=60	25-30	>=90	>=1.8
515	2985	2011-2012	65145	1	97	57	Female	Mexican American	3.59	High school or equivalent	21.9	80.3	moderate	former	yes	124	82	no	0	5.384	18	24	80.44	291.5	0.802	4.29	1.71	2.224	62543.612	70.26064679	5.227272727	0.38	<30	15635.903	<60	<25	60-90	>=1.8
516	2989	2011-2012	65149	2	102	31	Male	Non-Hispanic Black	0.67	Less than high school	29.6	98	moderate	never	yes	140	60	no	0	5.329	19	22	74.26	410.4	0.519	4.01	1.47	2.302	67576.508	134.8742965	3.222222222	2.2	<30	16894.127	<60	25-30	>=90	<1.3
517	2996	2011-2012	65156	2	97	44	Male	Non-Hispanic White	1.84	High school or equivalent	22	83.5	heavy	now	no	97	48	no	0	4.996	18	24	82.21	345	1.31	4.45	1.45	2.405	65601.36	99.48769193	6.153846154	2.91	<30	16400.34	<60	<25	>=90	>=1.8
518	3014	2011-2012	65174	2	91	31	Female	Non-Hispanic White	4.19	More than high school	29.7	102.6	mild	never	no	100	75	preDM	0	6.55	33	22	57.46	356.9	2.032	4.24	0.88	2.431	199562.27	118.6801144	4	-2.13	<30	49890.5675	<60	25-30	>=90	>=1.8
519	3017	2011-2012	65177	2	92	22	Male	Non-Hispanic White	3.51	More than high school	22.8	80.3	heavy	former	no	130	77	no	0	5.107	17	24	102.54	374.7	1.445	4.84	1.29	2.87	302294.3	88.88982772	3.103448276	6.46	<30	75573.575	<60	<25	60-90	>=1.8
520	3031	2011-2012	65191	1	93	30	Female	Other Race	2.3	More than high school	18.2	73.9	heavy	never	no	99	69	no	0	5.218	12	19	52.16	208.2	0.847	4.29	1.68	2.224	30350.099	123.3862855	9.047619048	-2.71	<30	7587.52475	<60	<25	>=90	>=1.8
521	3034	2011-2012	65194	1	93	31	Male	Other Race	1.84	More than high school	22.5	83	heavy	now	no	98	52	no	0	5.107	24	23	66.3	339	1.061	5.07	1.45	3.129	30213.086	122.2332356	3.255813953	2.42	<30	7553.2715	<60	<25	>=90	>=1.8
522	3035	2011-2012	65195	2	99	43	Male	Non-Hispanic Black	4.9	More than high school	39.4	125.1	mild	never	yes	130	88	DM	0	6.717	25	23	70.72	350.9	1.14	4.91	1.42	2.974	27427.479	126.4820734	3.333333333	5.99	<30	6856.86975	<60	>=30	>=90	>=1.8
523	3041	2011-2012	65201	1	101	77	Female	Non-Hispanic White	5	More than high school	22.9	80.3	mild	never	no	101	59	preDM	0	5.495	14	26	80.44	291.5	0.632	5.04	2.51	2.25	121917.411	61.05160888	11.64948454	-4.17	<30	30479.35275	>=60	<25	60-90	>=1.8
524	3042	2011-2012	65202	2	102	45	Male	Other Race	1.08	Less than high school	25.6	87	heavy	former	no	114	69	no	0	5.218	18	19	78.68	327.1	1.321	4.89	1.32	2.974	105109.897	103.2594182	3.578947368	0.35	<30	26277.47425	<60	25-30	>=90	<1.3
525	3045	2011-2012	65205	2	91	56	Male	Non-Hispanic White	1.61	High school or equivalent	22.8	85.2	mild	now	no	115	64	no	0	5.995	22	25	83.98	339	1.377	5.84	1.37	3.853	357232.338	89.12270993	14.13793103	2.06	<30	89308.0845	<60	<25	60-90	1.3-1.8
526	3057	2011-2012	65217	2	92	22	Female	Other Race	0.4	More than high school	18.8	64.5	mild	never	no	105	57	no	0	4.996	14	14	53.92	214.1	0.824	4.29	1.58	2.327	140281.985	129.0950822	11.18421053	5.69	<30	35070.49625	<60	<25	>=90	<1.3
527	3069	2011-2012	65229	2	91	31	Male	Non-Hispanic White	3.93	More than high school	24.8	88.5	heavy	never	no	121	70	no	0	4.607	23	25	91.05	315.2	0.824	3.47	1.09	1.991	259357.572	96.33959256	1.621621622	10.31	<30	64839.393	<60	<25	>=90	>=1.8
528	3070	2011-2012	65230	2	94	43	Male	Non-Hispanic White	1.3	High school or equivalent	23	86.2	former	never	no	109	70	no	0	5.162	16	17	82.21	339	1.863	5.17	1.37	2.948	58100.588	100.189015	3.364485981	1.09	<30	14525.147	<60	<25	>=90	1.3-1.8
529	3077	2011-2012	65237	1	90	25	Female	Non-Hispanic White	0.27	More than high school	27.2	72	mild	former	no	114	73	no	0	4.829	17	19	59.23	237.9	1.129	4.47	1.78	2.172	119084.362	122.5610152	10.85714286	5.24	<30	29771.0905	<60	25-30	>=90	<1.3
530	3089	2011-2012	65249	2	101	23	Female	Non-Hispanic White	0.73	More than high school	22.9	82.6	moderate	never	no	106	60	no	0	5.218	22	18	70.72	285.5	0.914	5.87	1.71	3.75	125542.437	104.2516515	7.142857143	1.52	<30	31385.60925	<60	<25	>=90	<1.3
531	3102	2011-2012	65262	1	93	35	Male	Other Race	2.38	More than high school	22.8	88.6	mild	never	no	107	62	no	0	5.273	41	44	61	404.5	1.829	5.28	1.19	3.258	46725.861	122.9899161	6.206896552	2.58	<30	11681.46525	<60	<25	>=90	>=1.8
532	3107	2011-2012	65267	2	92	37	Female	Other Race	5	More than high school	19.1	72.8	moderate	never	no	111	80	no	0	5.44	14	16	65.42	243.9	0.7	5.17	1.42	3.439	33118.467	103.8262259	9.6	5.6	<30	8279.61675	<60	<25	>=90	>=1.8
533	3109	2011-2012	65269	1	102	24	Male	Non-Hispanic White	0.21	More than high school	29.7	97	mild	never	no	112	71	no	0	5.718	34	27	91.94	392.6	0.666	4.22	1.22	2.689	51714.734	100.020026	2.117647059	-1.06	<30	12928.6835	<60	25-30	>=90	<1.3
534	3110	2011-2012	65270	1	94	24	Male	Non-Hispanic White	1.47	More than high school	30.4	103	former	never	no	134	86	no	0	4.885	52	36	88.4	404.5	1.547	5.48	1.58	3.207	74533.812	104.8770035	2.565789474	2.56	<30	18633.453	<60	>=30	>=90	1.3-1.8
535	3111	2011-2012	65271	1	91	27	Female	Non-Hispanic White	1.07	More than high school	31.8	96.4	heavy	now	no	118	74	no	0	5.218	18	18	60.11	309.3	1.4	4.19	0.8	2.741	80083.983	120.2635514	7.2	-2.69	<30	20020.99575	<60	>=30	>=90	<1.3
536	3128	2011-2012	65288	1	92	41	Female	Mexican American	5	More than high school	24.6	88	mild	former	no	112	64	no	0	5.218	18	22	68.95	202.2	1.163	5.87	1.71	3.62	79258.998	94.72461224	5.035971223	0.72	<30	19814.7495	<60	<25	>=90	>=1.8
537	3129	2011-2012	65289	1	98	73	Female	Non-Hispanic Black	1.57	More than high school	29.3	111.6	former	never	yes	155	61	DM	0	7.272	22	22	71.6	327.1	1.411	5.53	1.24	3.646	38079.999	83.32366626	11.52073733	-2.51	<30	9519.99975	>=60	25-30	60-90	1.3-1.8
538	3138	2011-2012	65298	1	97	49	Male	Non-Hispanic White	3.36	More than high school	25.3	89.9	mild	never	yes	126	35	no	0	5.218	26	24	91.94	333.1	0.576	3.72	1.34	2.121	296698.932	83.91086067	3.534883721	7.56	<30	74174.733	<60	25-30	60-90	>=1.8
539	3139	2011-2012	65299	2	94	29	Male	Non-Hispanic White	5	More than high school	22.7	82.8	mild	now	no	119	56	preDM	0	6.273	17	18	81.33	303.3	0.768	3.47	1.14	1.965	228135.664	111.9971651	7.5	5.74	<30	57033.916	<60	<25	>=90	>=1.8
540	3146	2011-2012	65306	1	100	30	Female	Non-Hispanic White	1.18	High school or equivalent	23.9	82.8	former	former	no	109	78	no	0	5.218	20	48	61	178.4	0.734	4.6	1.71	2.56	72851.57	117.1914294	5.789473684	1.53	<30	18212.8925	<60	<25	>=90	<1.3
541	3150	2011-2012	65310	1	101	40	Male	Non-Hispanic White	1.21	Less than high school	45.2	137.5	heavy	former	yes	118	69	no	0	5.607	31	26	106.96	505.6	1.829	3.34	0.83	1.681	59052.49	74.4356069	10.77419355	-2.59	<30	14763.1225	<60	>=30	60-90	<1.3
542	3160	2011-2012	65320	2	91	39	Male	Non-Hispanic White	0.98	High school or equivalent	27.6	98.4	moderate	now	no	117	87	no	0	5.273	26	30	107.85	428.3	1.355	4.81	1.14	3.051	262169.911	74.2181223	3.333333333	-1.11	<30	65542.47775	<60	25-30	60-90	<1.3
543	3171	2011-2012	65331	2	95	54	Female	Non-Hispanic Black	0.81	More than high school	36.3	116.9	former	never	yes	161	81	no	0	5.551	13	17	56.58	285.5	0.779	6.39	1.47	4.551	37989.235	116.9961446	17.77777778	2.11	<30	9497.30875	<60	>=30	>=90	<1.3
544	3174	2011-2012	65334	2	91	60	Female	Other Race	0.75	Less than high school	34.4	106.2	never	never	yes	173	71	DM	1	6.162	15	19	68.95	273.6	2.314	4.37	1.19	2.121	40203.098	82.88931632	777.027027	-0.67	>=30	10050.7745	>=60	>=30	60-90	<1.3
545	3175	2011-2012	65335	1	102	55	Male	Other Race	2.39	More than high school	29.3	107	mild	former	yes	119	80	no	0	5.44	21	20	99.01	422.3	0.734	3.88	1.19	2.353	36674.813	73.55333762	6.23655914	0.75	<30	9168.70325	<60	25-30	60-90	>=1.8
546	3178	2011-2012	65338	2	101	22	Female	Other Race	0.22	More than high school	22.2	77.5	heavy	never	no	111	73	no	0	4.718	18	26	52.16	362.8	1.942	3.78	1.16	1.733	40280.744	130.5187489	10.08928571	-4.09	<30	10070.186	<60	<25	>=90	<1.3
547	3179	2011-2012	65339	2	92	60	Male	Other Race	5	More than high school	37.5	123.5	heavy	former	no	112	64	DM	1	6.273	22	22	85.75	517.5	1.4	4.03	0.96	2.431	20745.311	84.49795328	84.7826087	3.78	>=30	5186.32775	>=60	>=30	60-90	>=1.8
548	3188	2011-2012	65348	2	98	45	Female	Non-Hispanic White	5	More than high school	29.5	100.4	heavy	never	yes	141	72	preDM	0	4.663	22	20	53.92	267.7	1.208	6.67	2.35	3.776	214552.428	109.8354197	8.75	3.03	<30	53638.107	<60	25-30	>=90	>=1.8
549	3193	2011-2012	65353	2	100	42	Female	Non-Hispanic Black	4.97	More than high school	28.9	95.4	mild	never	no	125	61	no	0	5.662	13	20	61.88	160.6	0.621	3.96	1.71	1.965	46792.961	123.5880628	7.190082645	3.82	<30	11698.24025	<60	25-30	>=90	>=1.8
550	3208	2011-2012	65368	2	98	23	Male	Non-Hispanic White	0.54	High school or equivalent	16.7	65.8	former	now	no	129	48	no	0	5.44	26	22	63.65	345	0.429	3.21	1.27	1.733	70852.136	131.4867053	2.5	5.91	<30	17713.034	<60	<25	>=90	<1.3
551	3210	2011-2012	65370	1	94	28	Female	Non-Hispanic White	1.57	More than high school	39	116.2	former	never	no	109	69	no	0	5.162	16	17	50.39	261.7	2.021	3.9	0.83	2.146	247116.164	126.5598285	9.415584416	-2.64	<30	61779.041	<60	>=30	>=90	1.3-1.8
552	3214	2011-2012	65374	2	91	80	Female	Non-Hispanic White	1.02	Less than high school	30.1	112.3	mild	former	yes	140	64	DM	1	10.047	16	18	78.68	309.3	3.026	5.02	1.32	2.302	81043.526	61.4063642	32.05128205	-0.49	>=30	20260.8815	>=60	>=30	60-90	<1.3
553	3215	2011-2012	65375	2	98	52	Female	Non-Hispanic White	5	High school or equivalent	27.4	83	never	never	no	122	70	no	0	5.718	15	26	75.14	190.3	1.14	7.86	2.46	4.888	325702.359	79.02772193	3.173076923	-4.27	<30	81425.58975	<60	25-30	60-90	>=1.8
554	3224	2011-2012	65384	2	102	72	Female	Other Race	1.68	High school or equivalent	22.1	81	mild	never	yes	119	68	DM	1	6.439	19	29	48.62	339	0.971	4.4	2.15	1.81	49219.53	94.00832487	50.4	-2.75	>=30	12304.8825	>=60	<25	>=90	1.3-1.8
555	3231	2011-2012	65391	2	92	51	Male	Other Race	1.91	High school or equivalent	22	79.8	never	never	no	NA	NA	no	0	5.384	27	26	80.44	291.5	0.813	6.62	1.76	4.5	30598.733	97.23641455	3.731343284	-0.85	<30	7649.68325	<60	<25	>=90	>=1.8
556	3233	2011-2012	65393	1	101	78	Male	Non-Hispanic White	1.22	High school or equivalent	37.3	129	former	never	yes	140	47	preDM	1	6.495	17	28	114.04	446.1	2.484	5.25	0.72	3.388	32065.833	52.75173273	12.62626263	-2.86	<30	8016.45825	>=60	>=30	<60	<1.3
557	3234	2011-2012	65394	1	91	71	Female	Non-Hispanic White	1.7	More than high school	24.1	87.5	moderate	never	no	98	63	no	0	4.441	17	22	60.11	303.3	1.321	6.62	1.42	4.603	58323.856	88.2878535	18.33333333	0.01	<30	14580.964	>=60	<25	60-90	1.3-1.8
558	3235	2011-2012	65395	3	91	77	Male	Other Race	0.83	More than high school	32.8	115.9	former	former	no	121	62	DM	0	7.438	26	19	64.53	452	1.502	4.24	1.16	2.379	32373.994	89.4703678	11.42857143	-2.79	<30	8093.4985	>=60	>=30	60-90	<1.3
559	3239	2011-2012	65399	2	99	59	Male	Non-Hispanic Black	4.34	More than high school	24.8	90.4	moderate	now	yes	125	77	DM	0	7.827	24	21	65.42	291.5	1.411	4.78	0.72	3.414	63242.739	116.7166194	21.32978723	1.25	<30	15810.68475	<60	<25	>=90	>=1.8
560	3241	2011-2012	65401	2	91	55	Male	Non-Hispanic White	1.4	More than high school	24.4	103.8	mild	former	yes	168	110	no	0	4.885	28	38	79.56	339	0.869	7.01	2.79	3.827	74141.525	95.81373716	5.222222222	1.03	<30	18535.38125	<60	<25	>=90	1.3-1.8
561	3242	2011-2012	65402	1	94	33	Male	Non-Hispanic White	5	Less than high school	21.1	77.5	mild	now	yes	114	72	preDM	0	4.663	47	37	67.18	398.5	1.377	6.62	1.34	4.655	242425.633	119.8736138	4.285714286	-0.32	<30	60606.40825	<60	<25	>=90	>=1.8
562	3244	2011-2012	65404	2	101	27	Female	Other Race	2.85	More than high school	18.7	64.8	mild	never	no	102	63	no	0	4.996	15	20	63.65	249.8	0.723	4.09	1.4	2.353	42910.703	115.1332446	8.181818182	-4.89	<30	10727.67575	<60	<25	>=90	>=1.8
563	3256	2011-2012	65416	1	98	23	Male	Other Race	2.15	More than high school	22.9	76.2	never	now	no	NA	NA	no	0	5.051	13	18	88.4	350.9	0.79	3.7	2.09	1.241	39753.045	105.6163177	5.918367347	-3.63	<30	9938.26125	<60	<25	>=90	>=1.8
564	3261	2011-2012	65421	1	95	70	Female	Mexican American	0.65	Less than high school	38.5	131.4	never	now	no	117	61	preDM	0	5.884	20	20	51.27	309.3	2.202	4.37	0.98	2.379	79476.028	93.68699992	10.46153846	-3.31	<30	19869.007	>=60	>=30	>=90	<1.3
565	3263	2011-2012	65423	2	95	50	Male	Mexican American	2.24	Less than high school	29.8	107.4	heavy	now	yes	141	81	preDM	0	6.439	34	28	65.42	380.7	1.05	5.09	1.78	2.819	41483.959	107.5526145	9.032258065	-2.52	<30	10370.98975	<60	25-30	>=90	>=1.8
566	3271	2011-2012	65431	2	100	73	Male	Non-Hispanic Black	1.47	More than high school	25.4	92.7	mild	former	yes	142	50	preDM	0	6.384	22	22	112.27	297.4	0.858	4.63	1.89	2.353	22593.316	64.36699581	18.73737374	6.06	<30	5648.329	>=60	25-30	60-90	1.3-1.8
567	3273	2011-2012	65433	2	92	60	Female	Non-Hispanic White	4.03	More than high school	39.2	133.5	moderate	former	yes	NA	NA	preDM	0	5.829	19	21	77.79	410.4	2.45	4.99	1.06	2.819	78212.888	71.64095748	28.46774194	4.03	<30	19553.222	>=60	>=30	60-90	>=1.8
568	3276	2011-2012	65436	2	101	28	Male	Other Race	1.1	More than high school	31.2	106.3	mild	never	no	121	65	no	0	5.384	20	25	86.63	315.2	1.039	4.65	1.01	3.181	32972.684	104.4924565	2.608695652	-2.94	<30	8243.171	<60	>=30	>=90	<1.3
569	3286	2011-2012	65446	2	90	65	Male	Non-Hispanic Black	1.73	Less than high school	28.1	100.3	mild	now	yes	158	99	DM	0	8.049	38	39	117.57	410.4	2.337	6.1	1.19	3.853	25177.311	64.39191137	6.666666667	-0.54	<30	6294.32775	>=60	25-30	60-90	1.3-1.8
570	3290	2011-2012	65450	2	98	49	Female	Mexican American	1.21	Less than high school	24.8	83.6	never	never	no	119	77	preDM	1	6.162	20	26	43.32	232	1.016	5.15	1.19	3.491	78330.765	114.772651	40.46875	-1.81	>=30	19582.69125	<60	<25	>=90	<1.3
571	3291	2011-2012	65451	2	91	33	Female	Non-Hispanic White	4.2	More than high school	29.1	97.2	mild	never	no	116	75	no	0	4.774	34	18	68.07	285.5	0.937	3.67	1.03	2.198	203553.515	101.775662	6.26984127	-1.22	<30	50888.37875	<60	25-30	>=90	>=1.8
572	3297	2011-2012	65457	1	92	25	Male	Other Race	4.44	More than high school	24.9	90.3	mild	never	no	112	75	no	0	5.718	19	17	84.86	297.4	0.565	3.72	1.37	2.095	29927.03	109.4116577	3.323442136	-2.62	<30	7481.7575	<60	<25	>=90	>=1.8
573	3298	2011-2012	65458	2	94	63	Male	Non-Hispanic White	5	More than high school	30.2	115.5	mild	never	yes	122	68	preDM	1	5.607	18	26	74.26	475.8	3.285	4.86	1.01	2.353	337915.074	93.18299235	39.64497041	1.97	>=30	84478.7685	>=60	>=30	>=90	>=1.8
574	3300	2011-2012	65460	2	100	64	Female	Other Race	2.11	Less than high school	32	104.1	heavy	never	yes	98	41	DM	0	6.162	28	22	68.95	350.9	3.15	5.66	1.09	3.129	18408.759	80.5926714	7.777777778	1.21	<30	4602.18975	>=60	>=30	60-90	>=1.8
575	3304	2011-2012	65464	1	90	29	Female	Non-Hispanic Black	2.96	More than high school	30	92.2	mild	never	no	121	76	no	0	5.218	13	17	69.84	267.7	0.418	4.27	1.53	2.56	39850.005	116.9845938	3.090909091	-2.53	<30	9962.50125	<60	>=30	>=90	>=1.8
576	3313	2011-2012	65473	2	95	60	Female	Non-Hispanic Black	0.81	Less than high school	20.6	80.8	former	never	yes	186	102	no	0	5.94	20	28	61	309.3	1.637	5.9	1.73	3.414	36732.083	109.4255913	12	1.07	<30	9183.02075	>=60	<25	>=90	<1.3
577	3316	2011-2012	65476	1	101	32	Female	Non-Hispanic Black	0.21	More than high school	53.1	135.5	mild	never	yes	122	70	DM	0	5.829	16	22	70.72	327.1	0.926	3.39	1.03	1.94	82929.465	112.8162802	6.728971963	4.11	<30	20732.36625	<60	>=30	>=90	<1.3
578	3325	2011-2012	65485	1	97	42	Male	Non-Hispanic White	1.03	More than high school	39.4	124.9	heavy	never	yes	141	76	no	0	5.107	37	26	76.02	404.5	0.994	5.56	1.34	3.75	69294.054	106.9553116	6.373626374	2.41	<30	17323.5135	<60	>=30	>=90	<1.3
579	3332	2011-2012	65492	1	99	65	Female	Other Race	1.07	Less than high school	20.7	83	mild	never	no	118	68	no	0	5.718	25	27	50.39	208.2	0.948	4.99	1.6	2.948	24013.934	97.59286597	15	3.77	<30	6003.4835	>=60	<25	>=90	<1.3
580	3340	2011-2012	65500	2	100	46	Male	Non-Hispanic Black	4.82	High school or equivalent	31.6	98.6	former	never	yes	142	85	no	0	5.495	24	39	88.4	279.6	1.637	5.79	1.09	3.957	49872.463	103.8800689	9.336734694	4.73	<30	12468.11575	<60	>=30	>=90	>=1.8
581	3341	2011-2012	65501	1	98	24	Female	Non-Hispanic White	0	More than high school	22.8	75	never	never	no	NA	NA	no	0	5.107	14	18	49.5	232	0.497	2.9	1.24	1.422	118335.017	130.926588	10.6779661	3.87	<30	29583.75425	<60	<25	>=90	<1.3
582	3343	2011-2012	65503	2	102	44	Female	Mexican American	1.02	Less than high school	42.8	124.6	never	never	no	126	72	DM	0	7.993	47	42	48.62	333.1	2.156	4.99	0.78	3.233	75006.521	114.4425052	12.45283019	0.86	<30	18751.63025	<60	>=30	>=90	<1.3
583	3345	2011-2012	65505	3	92	55	Male	Other Race	5	More than high school	22.4	87	heavy	former	no	104	58	DM	0	7.993	39	26	65.42	309.3	1.806	3.59	1.53	1.241	37632.616	103.8406061	5.277777778	0.81	<30	9408.154	<60	<25	>=90	>=1.8
584	3364	2011-2012	65524	1	94	63	Male	Mexican American	1.48	Less than high school	23	91.5	mild	former	no	NA	NA	no	0	5.44	14	17	60.11	255.8	1.31	5.87	1.5	3.776	18149.005	101.6375707	4.016393443	-3.3	<30	4537.25125	>=60	<25	>=90	1.3-1.8
585	3370	2011-2012	65530	1	94	40	Male	Non-Hispanic White	1.04	More than high school	28	110.6	heavy	now	yes	126	77	no	0	4.996	50	32	85.75	469.9	3.726	6.08	1.01	3.362	299457.737	97.24364286	3.944444444	-3.5	<30	74864.43425	<60	25-30	>=90	<1.3
586	3374	2011-2012	65534	2	95	31	Female	Non-Hispanic Black	0.18	More than high school	30.9	93.8	never	never	no	107	48	no	0	5.218	17	17	61	226	0.711	4.11	1.34	2.431	64053.045	134.1500058	4.207650273	-4.94	<30	16013.26125	<60	>=30	>=90	<1.3
587	3379	2011-2012	65539	1	92	27	Male	Other Race	4.44	More than high school	27.1	98.2	moderate	never	no	116	77	no	0	5.718	32	23	74.26	452	1.05	5.53	1.27	3.776	29927.03	119.9951538	3.768115942	-1.32	<30	7481.7575	<60	25-30	>=90	>=1.8
588	3386	2011-2012	65546	1	92	22	Female	Non-Hispanic Black	1.31	More than high school	25.8	95.8	heavy	never	no	106	62	no	0	5.44	9	17	76.02	309.3	0.711	3.98	1.45	2.198	59390.312	110.8935937	6.60130719	-1.27	<30	14847.578	<60	25-30	>=90	1.3-1.8
589	3387	2011-2012	65547	2	100	63	Female	Non-Hispanic White	0.73	More than high school	31.6	114.5	moderate	former	yes	114	64	preDM	0	5.94	26	30	73.37	475.8	1.016	4.65	1.66	2.534	50441.639	75.28756723	5	-3.06	<30	12610.40975	>=60	>=30	60-90	<1.3
590	3388	2011-2012	65548	2	98	47	Female	Non-Hispanic White	4.16	More than high school	46.7	127.4	moderate	never	yes	113	80	preDM	0	6.495	27	21	72.49	398.5	1.964	5.51	1.09	3.517	231104.812	85.48693654	4.536585366	3.47	<30	57776.203	<60	>=30	60-90	>=1.8
591	3389	2011-2012	65549	1	92	80	Male	Non-Hispanic White	1.84	High school or equivalent	27.4	100.5	never	never	yes	136	60	preDM	1	5.94	24	29	96.36	374.7	0.982	3.54	1.11	1.991	25325.558	63.76605511	58.90410959	4.67	>=30	6331.3895	>=60	25-30	60-90	>=1.8
592	3395	2011-2012	65555	1	98	20	Female	Non-Hispanic White	0.45	More than high school	19.2	65.5	moderate	never	no	100	64	no	0	4.885	17	17	59.23	273.6	0.655	3.98	1.68	1.991	121790.38	126.9422253	8.088235294	7	<30	30447.595	<60	<25	>=90	<1.3
593	3402	2011-2012	65562	2	95	62	Female	Non-Hispanic Black	1.36	More than high school	49.2	133.5	moderate	now	yes	136	81	DM	0	7.216	12	19	86.63	452	2.235	4.29	1.19	2.069	22712.544	71.49780345	5.597484277	-1.79	<30	5678.136	>=60	>=30	60-90	1.3-1.8
594	3405	2011-2012	65565	1	91	27	Male	Non-Hispanic White	2.69	High school or equivalent	29	100.5	mild	never	no	123	78	no	0	5.218	30	21	74.26	315.2	1.411	4.94	1.29	3	235747.936	119.9951538	8.210526316	-2.12	<30	58936.984	<60	25-30	>=90	>=1.8
595	3415	2011-2012	65575	2	94	28	Male	Other Race	1.74	Less than high school	21.5	81.8	heavy	never	no	118	74	no	0	5.273	29	29	67.18	315.2	1.005	6.96	1.94	4.551	72442.171	124.1587568	6.166666667	1.66	<30	18110.54275	<60	<25	>=90	1.3-1.8
596	3425	2011-2012	65585	2	91	49	Female	Other Race	2.34	More than high school	22.5	82	former	never	no	120	86	no	0	4.94	16	22	59.23	261.7	0.621	4.5	2.07	2.146	61740.442	103.5462353	6.785714286	-1.25	<30	15435.1105	<60	<25	>=90	>=1.8
597	3427	2011-2012	65587	1	94	78	Male	Non-Hispanic White	1.91	More than high school	29.3	109	never	never	no	120	68	no	0	4.94	20	23	61	237.9	0.756	4.91	1.45	3.129	135109.432	90.92581247	1.946308725	0.79	<30	33777.358	>=60	25-30	>=90	>=1.8
598	3430	2011-2012	65590	2	93	43	Female	Non-Hispanic Black	2.07	High school or equivalent	33.1	96.5	mild	never	yes	134	77	no	0	4.996	10	17	69.84	261.7	0.824	4.11	1.66	2.069	47334.085	106.0274094	14.09638554	0.48	<30	11833.52125	<60	>=30	>=90	>=1.8
599	3434	2011-2012	65594	1	99	60	Female	Non-Hispanic Black	1.74	High school or equivalent	21.9	80.7	heavy	now	yes	174	83	DM	1	6.106	14	24	72.49	505.6	2.687	5.9	2.09	2.56	27164.841	89.9467717	31.29213483	-0.71	>=30	6791.21025	>=60	<25	60-90	1.3-1.8
600	3461	2011-2012	65621	1	96	63	Male	Non-Hispanic Black	5	High school or equivalent	38.8	126.1	heavy	former	yes	146	99	DM	0	7.716	21	20	112.27	499.6	0.994	3.83	1.14	2.224	22962.547	69.05112441	4.716981132	3.74	<30	5740.63675	>=60	>=30	60-90	>=1.8
601	3465	2011-2012	65625	3	91	23	Male	Other Race	0.73	More than high school	38.4	126	heavy	never	no	114	75	DM	0	13.489	145	82	51.27	297.4	2.314	3.83	1.14	1.629	31835.501	143.7065602	7.751937984	9.08	<30	7958.87525	<60	>=30	>=90	<1.3
602	3473	2011-2012	65633	1	98	57	Male	Non-Hispanic White	0.04	More than high school	26.8	96.9	mild	former	no	137	88	DM	0	6.661	13	21	94.59	345	1.919	4.22	1.19	2.146	70021.412	76.64440968	5.094339623	-2.16	<30	17505.353	<60	25-30	60-90	<1.3
603	3475	2011-2012	65635	2	97	29	Female	Non-Hispanic Black	0.81	High school or equivalent	30.8	98.3	never	never	no	89	68	DM	0	7.66	13	16	49.5	166.5	0.903	4.86	1.32	3.129	50116.867	145.7201765	15.91549296	6.67	<30	12529.21675	<60	>=30	>=90	<1.3
604	3477	2011-2012	65637	1	99	66	Male	Non-Hispanic Black	3.49	More than high school	25.5	97.7	former	former	no	126	60	no	0	5.329	10	19	83.98	333.1	0.835	4.34	1.45	2.508	15122.84	96.03938276	15.04166667	6.06	<30	3780.71	>=60	25-30	>=90	>=1.8
605	3482	2011-2012	65642	2	94	41	Female	Non-Hispanic White	5	More than high school	34.6	95.4	never	never	no	117	58	no	0	4.163	23	31	61	410.4	1.287	5.97	1.37	4.008	214518.798	108.4769797	14.64285714	5.15	<30	53629.6995	<60	>=30	>=90	>=1.8
606	3485	2011-2012	65645	2	91	80	Male	Non-Hispanic White	1.61	More than high school	24.1	98.5	former	never	no	128	65	DM	1	7.161	27	23	101.66	416.4	1.524	5.43	1.19	3.543	84775.967	59.76604221	9.75	1.92	<30	21193.99175	>=60	<25	<60	1.3-1.8
607	3487	2011-2012	65647	1	94	29	Female	Non-Hispanic White	1.04	High school or equivalent	33.3	106.4	former	never	no	119	82	preDM	0	5.829	80	41	66.3	362.8	1.479	3.85	0.88	2.302	120483.155	108.0600493	19.21568627	-2.83	<30	30120.78875	<60	>=30	>=90	<1.3
608	3493	2011-2012	65653	2	96	30	Female	Non-Hispanic Black	0.65	Less than high school	40.9	119	mild	former	no	105	64	no	0	5.107	14	17	71.6	273.6	0.926	5.12	1.29	3.414	76394.112	112.7069469	4.953703704	-4.39	<30	19098.528	<60	>=30	>=90	<1.3
609	3500	2011-2012	65660	1	97	73	Female	Non-Hispanic White	0.75	Less than high school	51.8	145.6	mild	former	yes	125	71	no	1	5.107	18	17	66.3	374.7	1.964	5.9	1.32	3.672	107574.784	79.32902109	39.75308642	1.54	>=30	26893.696	>=60	>=30	60-90	<1.3
610	3503	2011-2012	65663	1	94	24	Female	Non-Hispanic White	0.74	High school or equivalent	30.4	92.6	never	now	no	113	60	no	0	6.106	14	12	46.85	285.5	1.4	5.87	1.34	3.879	108043.744	133.319891	6.046511628	-0.85	<30	27010.936	<60	>=30	>=90	<1.3
611	3512	2011-2012	65672	2	101	22	Female	Other Race	0.92	More than high school	23.5	76.7	mild	never	no	124	57	no	1	5.384	13	17	65.42	267.7	0.723	3.93	1.47	2.121	93255.055	115.3634779	99.56521739	0.38	>=30	23313.76375	<60	<25	>=90	<1.3
612	3515	2011-2012	65675	1	102	66	Male	Mexican American	4.42	More than high school	44.8	135.4	mild	now	no	107	76	preDM	1	6.495	29	28	106.08	475.8	2.01	4.22	1.11	2.172	21508.664	62.63521619	657.4074074	-0.43	>=30	5377.166	>=60	>=30	60-90	>=1.8
613	3518	2011-2012	65678	1	91	33	Male	Non-Hispanic White	1.07	High school or equivalent	27.7	98.8	moderate	now	no	123	68	no	0	5.384	34	28	96.36	285.5	1.919	6.93	1.01	5.043	32058.25	88.7104681	6.25	-2.3	<30	8014.5625	<60	25-30	60-90	<1.3
614	3528	2011-2012	65688	2	91	54	Female	Non-Hispanic White	5	More than high school	25	88.5	heavy	former	yes	122	69	no	0	5.44	36	45	63.65	291.5	1.321	6.47	1.68	4.189	396297.059	95.24242685	4.444444444	9	<30	99074.26475	<60	25-30	>=90	>=1.8
615	3552	2011-2012	65712	2	90	75	Male	Other Race	2.24	More than high school	36	119.8	mild	former	yes	102	49	preDM	1	6.051	13	25	123.76	350.9	1.355	3.26	1.09	1.552	27911.144	48.8003738	301.0548523	-0.51	>=30	6977.786	>=60	>=30	<60	>=1.8
616	3566	2011-2012	65726	2	101	23	Male	Other Race	1.1	More than high school	22	76.1	mild	never	no	130	71	no	0	5.607	20	23	79.56	285.5	1.626	5.64	1.53	3.362	34427.23	119.9642458	4.31372549	3.35	<30	8606.8075	<60	<25	>=90	<1.3
617	3576	2011-2012	65736	1	100	71	Male	Other Race	1.18	High school or equivalent	28.2	102.7	mild	former	yes	NA	NA	DM	0	6.717	58	35	99.89	374.7	1.298	2.77	1.14	1.034	42941.101	65.03140119	6.16	-1.54	<30	10735.27525	>=60	25-30	60-90	<1.3
618	3577	2011-2012	65737	2	95	53	Female	Non-Hispanic White	3.34	High school or equivalent	28.2	102.4	former	now	no	117	65	no	0	5.94	14	16	68.07	303.3	2.54	7.14	1.11	4.862	79653.133	88.43596232	7.142857143	-2.56	<30	19913.28325	<60	25-30	60-90	>=1.8
619	3578	2011-2012	65738	1	97	35	Male	Non-Hispanic White	0.93	High school or equivalent	26.9	91.3	mild	now	no	128	76	no	0	5.551	26	19	82.21	327.1	1.682	4.94	0.88	3.284	43780.138	105.9805378	5.416666667	2.81	<30	10945.0345	<60	25-30	>=90	<1.3
620	3579	2011-2012	65739	2	98	71	Male	Non-Hispanic White	3.06	More than high school	23.6	97.7	former	now	yes	131	71	no	0	5.495	29	27	76.91	321.2	0.621	4.14	1.55	2.302	134423.466	86.82944286	4.444444444	0.99	<30	33605.8665	>=60	<25	60-90	>=1.8
621	3581	2011-2012	65741	2	102	26	Male	Mexican American	1.09	Less than high school	31.3	98.8	heavy	now	no	136	55	no	0	5.44	65	32	57.46	380.7	1.885	4.71	0.91	2.948	77152.964	134.2721229	1.411764706	-3.21	<30	19288.241	<60	>=30	>=90	<1.3
622	3585	2011-2012	65745	2	103	27	Male	Non-Hispanic White	3.44	More than high school	28.1	102.1	mild	former	no	117	78	no	0	5.273	30	23	91.94	422.3	1.231	4.37	1.03	2.767	160682.594	97.93427412	2.881355932	-4.1	<30	40170.6485	<60	25-30	>=90	>=1.8
623	3591	2011-2012	65751	2	94	54	Male	Mexican American	0.03	High school or equivalent	26.2	100	heavy	former	no	130	83	DM	0	6.828	31	31	71.6	321.2	3.105	5.59	1.06	3.103	43221.256	100.7592347	5.081967213	6.44	<30	10805.314	<60	25-30	>=90	<1.3
624	3597	2011-2012	65757	2	97	45	Female	Non-Hispanic White	1.45	High school or equivalent	35.8	107.5	mild	now	yes	119	86	no	1	5.162	20	17	53.92	249.8	1.581	4.91	1.06	3.129	46549.899	109.8354197	34.72727273	4.43	>=30	11637.47475	<60	>=30	>=90	1.3-1.8
625	3604	2011-2012	65764	1	94	73	Female	Non-Hispanic White	1.91	High school or equivalent	35.8	118.3	former	former	yes	149	73	preDM	0	5.329	35	35	59.23	291.5	2.958	5.07	1.19	2.534	137663.963	87.48151134	27.44186047	-3.31	<30	34415.99075	>=60	>=30	60-90	>=1.8
626	3612	2011-2012	65772	1	92	80	Female	Non-Hispanic Black	1.31	High school or equivalent	30.4	103.1	never	never	yes	233	62	DM	1	13.878	19	24	198.02	368.8	0.903	3.03	1.22	1.396	47595.317	23.19111577	1511.111111	-0.23	>=30	11898.82925	>=60	>=30	<60	1.3-1.8
627	3614	2011-2012	65774	2	103	24	Male	Mexican American	1.98	Less than high school	34.9	110.7	mild	never	no	122	80	no	0	6.051	40	33	97.24	398.5	3.093	4.81	0.78	2.612	74470.444	93.46231072	2.773722628	9.81	<30	18617.611	<60	>=30	>=90	>=1.8
628	3621	2011-2012	65781	1	93	41	Female	Other Race	1.15	More than high school	27.5	88.6	never	never	yes	145	96	DM	0	7.216	14	19	75.14	410.4	1.806	5.53	1.01	3.698	47775.81	85.37637863	10.37735849	-2.91	<30	11943.9525	<60	25-30	60-90	<1.3
629	3622	2011-2012	65782	1	97	53	Female	Non-Hispanic Black	5	More than high school	34.8	106.6	never	never	no	139	76	preDM	0	6.384	22	23	70.72	345	1.197	4.09	0.98	2.56	51357.007	97.34328417	6.821192053	-4.12	<30	12839.25175	<60	>=30	>=90	>=1.8
630	3623	2011-2012	65783	1	91	25	Male	Non-Hispanic White	3.78	More than high school	24.8	93.2	mild	never	no	113	57	no	0	4.385	19	23	67.18	428.3	0.644	4.27	1.24	2.741	302187.837	126.8030238	3.416370107	-1.33	<30	75546.95925	<60	<25	>=90	>=1.8
631	3624	2011-2012	65784	2	95	57	Female	Non-Hispanic Black	2.58	More than high school	25.9	79.1	former	former	yes	123	73	no	0	4.94	19	24	80.44	339	1.727	5.22	1.4	3.026	44694.302	80.99491227	4.772727273	9.4	<30	11173.5755	<60	25-30	60-90	>=1.8
632	3627	2011-2012	65787	2	94	39	Male	Non-Hispanic White	2.38	More than high school	28.4	95.4	moderate	never	no	108	73	no	0	5.607	17	19	68.95	279.6	0.802	4.78	1.24	3.181	189138.513	113.7057936	3.80952381	2.45	<30	47284.62825	<60	25-30	>=90	>=1.8
633	3637	2011-2012	65797	1	90	52	Female	Non-Hispanic Black	4.48	More than high school	31.8	96	former	never	no	106	66	no	0	5.44	18	24	68.95	261.7	1.039	4.32	1.42	2.431	44999.596	101.0764931	3.75	4.04	<30	11249.899	<60	>=30	>=90	>=1.8
634	3638	2011-2012	65798	2	102	26	Female	Other Race	0.57	High school or equivalent	38.5	123.2	never	never	no	102	64	no	0	5.94	46	28	43.32	362.8	0.96	5.64	1.66	3.543	100856.947	134.8980581	11.21212121	-3.71	<30	25214.23675	<60	>=30	>=90	<1.3
635	3640	2011-2012	65800	1	92	61	Female	Non-Hispanic White	5	More than high school	31	104.9	moderate	former	yes	142	84	no	0	5.44	28	30	61	285.5	1.976	4.81	1.37	2.534	352154.233	94.25894067	5.185185185	0.46	<30	88038.55825	>=60	>=30	>=90	>=1.8
636	3644	2011-2012	65804	1	97	59	Male	Non-Hispanic White	4.96	More than high school	31.6	111	moderate	former	yes	140	78	no	0	5.162	25	34	110.5	386.6	3.093	5.07	1.06	2.586	378513.814	62.62384976	2.62295082	7.42	<30	94628.4535	<60	>=30	60-90	>=1.8
637	3647	2011-2012	65807	2	98	49	Male	Non-Hispanic White	4.16	More than high school	31.6	102.1	moderate	never	yes	123	69	preDM	0	6.606	30	24	100.78	327.1	1.084	6.18	1.32	4.37	231662.515	75.09543158	2.068965517	0.41	<30	57915.62875	<60	>=30	60-90	>=1.8
638	3648	2011-2012	65808	2	100	65	Male	Non-Hispanic Black	2.46	High school or equivalent	26.2	87.8	mild	never	yes	123	70	no	0	5.829	39	26	111.38	398.5	0.745	4.47	1.73	2.405	19844.318	68.74165146	12.20338983	-2.75	<30	4961.0795	>=60	25-30	60-90	>=1.8
639	3652	2011-2012	65812	2	92	30	Male	Other Race	1.35	More than high school	21.9	79.7	never	now	no	118	83	no	0	5.384	19	17	65.42	249.8	0.835	4.63	1.09	3.155	32738.043	123.7758741	7.5	0.4	<30	8184.51075	<60	<25	>=90	1.3-1.8
640	3662	2011-2012	65822	1	91	63	Male	Non-Hispanic White	2.2	Less than high school	30.2	116.8	mild	now	no	126	70	no	0	5.884	19	23	88.4	285.5	1.219	5.69	1.19	3.931	186602.271	79.74454084	5.685279188	-3.12	<30	46650.56775	>=60	>=30	60-90	>=1.8
641	3663	2011-2012	65823	1	102	37	Male	Mexican American	0.33	Less than high school	29.5	104	heavy	now	yes	132	88	no	0	5.329	26	22	91.94	327.1	2.01	4.53	1.11	2.483	92442.998	91.290838	3.414634146	-3.13	<30	23110.7495	<60	25-30	>=90	<1.3
642	3678	2011-2012	65838	1	95	63	Male	Other Race	2.65	More than high school	30.7	105.6	mild	former	yes	146	65	DM	0	7.438	25	17	78.68	398.5	2.043	5.97	1.27	3.776	21509.225	90.99471027	17.12643678	1.35	<30	5377.30625	>=60	>=30	>=90	>=1.8
643	3681	2011-2012	65841	1	93	63	Male	Non-Hispanic White	5	More than high school	34.2	125.8	heavy	now	yes	114	66	preDM	0	6.439	18	16	66.3	333.1	1.998	6.03	1.32	3.801	188934.77	97.62594707	4.678899083	2.28	<30	47233.6925	>=60	>=30	>=90	>=1.8
644	3690	2011-2012	65850	3	92	58	Male	Mexican American	1.56	High school or equivalent	25.6	100.6	former	never	no	126	70	DM	1	11.713	38	29	94.59	523.4	2.123	7.71	1.24	5.482	49492.976	76.10789881	3666.666667	-2.91	>=30	12373.244	<60	25-30	60-90	1.3-1.8
645	3692	2011-2012	65852	2	92	29	Female	Other Race	5	More than high school	22	66.9	mild	never	no	111	85	no	0	4.108	84	62	85.75	214.1	1.208	5.22	2.51	2.172	93401.071	79.17848763	6.941176471	1.27	<30	23350.26775	<60	<25	60-90	>=1.8
646	3694	2011-2012	65854	3	90	56	Male	Other Race	3.14	High school or equivalent	24.5	89.6	heavy	never	yes	134	74	no	1	5.551	15	17	88.4	356.9	0.869	4.34	1.29	2.664	25471.279	83.76377129	51.94805195	-3.75	>=30	6367.81975	<60	<25	60-90	>=1.8
647	3703	2011-2012	65863	2	92	33	Female	Other Race	4.59	More than high school	19.7	78	mild	never	no	109	73	preDM	0	5.218	13	21	43.32	291.5	1.061	4.63	1.71	2.431	36577.251	128.4252552	20.45454545	1.31	<30	9144.31275	<60	<25	>=90	>=1.8
648	3709	2011-2012	65869	2	100	66	Female	Non-Hispanic Black	1.16	High school or equivalent	40	107.3	former	never	yes	118	55	preDM	0	6.495	30	40	74.26	428.3	1.039	4.58	1.14	2.974	37130.176	83.758398	12.56830601	-5.56	<30	9282.544	>=60	>=30	60-90	<1.3
649	3714	2011-2012	65874	1	91	43	Female	Non-Hispanic White	2.77	More than high school	25.5	91.3	moderate	never	no	108	66	no	0	5.107	15	20	54.81	267.7	1.829	6.05	1.5	3.724	272179.845	110.7951033	12.38095238	-1.12	<30	68044.96125	<60	25-30	>=90	>=1.8
650	3716	2011-2012	65876	1	102	36	Male	Non-Hispanic Black	0	More than high school	46	137.5	heavy	now	yes	128	76	DM	1	5.551	49	45	76.91	529.4	1.671	3.34	1.4	1.164	43636.199	128.3547097	755	0.7	>=30	10909.04975	<60	>=30	>=90	<1.3
651	3719	2011-2012	65879	3	92	32	Female	Mexican American	5	More than high school	25.9	87.6	former	never	no	104	70	no	0	5.329	12	17	53.04	249.8	1.253	3.7	0.93	2.198	112842.902	120.9940288	10.16666667	-2.76	<30	28210.7255	<60	25-30	>=90	>=1.8
652	3720	2011-2012	65880	2	96	26	Female	Mexican American	1.47	More than high school	25.8	83.1	heavy	never	no	106	65	no	0	5.218	14	18	52.16	214.1	0.497	5.33	1.86	3.233	151528.236	126.9024177	4.21686747	6.45	<30	37882.059	<60	25-30	>=90	1.3-1.8
653	3725	2011-2012	65885	1	99	69	Male	Non-Hispanic White	1.16	More than high school	21.9	101.6	former	former	yes	129	58	DM	0	6.106	36	60	51.27	214.1	2.089	4.09	0.7	2.431	51575.895	104.0260301	23.82352941	-2.49	<30	12893.97375	>=60	<25	>=90	<1.3
654	3729	2011-2012	65889	1	103	30	Male	Other Race	1.57	More than high school	33.9	103.4	heavy	never	no	138	84	no	0	6.106	36	35	94.59	368.8	1.095	3.54	1.03	2.017	72649.285	92.65114146	3.6	2.63	<30	18162.32125	<60	>=30	>=90	1.3-1.8
655	3732	2011-2012	65892	1	101	80	Female	Non-Hispanic White	0.86	Less than high school	28.3	97.7	never	never	yes	127	29	no	1	5.718	16	23	108.73	374.7	0.914	4.91	1.63	2.87	56802.877	41.52700617	58.10344828	-3.35	>=30	14200.71925	>=60	25-30	<60	<1.3
656	3749	2011-2012	65909	1	91	35	Male	Other Race	3.78	More than high school	19	78.1	mild	never	no	112	64	no	0	5.495	39	31	61	309.3	3.714	6.28	1.06	3.517	42060.757	122.9899161	9.411764706	9.8	<30	10515.18925	<60	<25	>=90	>=1.8
657	3750	2011-2012	65910	2	100	36	Male	Other Race	5	More than high school	31.1	109.2	moderate	never	no	123	83	preDM	1	6.217	21	21	76.91	505.6	0.926	4.78	1.32	3.051	29536.064	111.0307611	47.60869565	1.11	>=30	7384.016	<60	>=30	>=90	>=1.8
658	3751	2011-2012	65911	3	92	76	Female	Non-Hispanic White	1.59	High school or equivalent	35.1	110.1	former	former	yes	142	53	DM	1	13.156	22	17	75.14	243.9	2.427	4.45	0.96	2.379	97919.812	66.76693299	90.47619048	-0.36	>=30	24479.953	>=60	>=30	60-90	1.3-1.8
659	3763	2011-2012	65923	2	91	62	Male	Non-Hispanic White	5	More than high school	20.7	79.9	mild	never	no	99	65	no	0	4.774	16	27	100.78	380.7	0.847	4.14	1.45	2.302	283600.491	68.54152264	6.075949367	15.38	<30	70900.12275	>=60	<25	60-90	>=1.8
660	3767	2011-2012	65927	2	97	65	Female	Non-Hispanic White	3.06	More than high school	33.3	119.1	moderate	never	no	124	74	no	0	5.829	18	33	63.65	279.6	1.66	5.43	1.66	3.026	238319.62	88.16012281	8.601036269	-0.84	<30	59579.905	>=60	>=30	60-90	>=1.8
661	3769	2011-2012	65929	3	92	64	Male	Non-Hispanic White	1.59	High school or equivalent	31.5	116.6	former	never	yes	137	85	no	0	5.162	22	26	97.24	327.1	0.689	4.65	1.09	3.258	88485.023	70.5677798	4.649122807	0.87	<30	22121.25575	>=60	>=30	60-90	1.3-1.8
662	3791	2011-2012	65951	1	99	50	Female	Non-Hispanic White	4.86	More than high school	33.1	107.7	mild	never	yes	118	71	no	0	5.495	23	22	73.37	339	1.31	4.19	1.14	2.457	243819.848	82.48652986	3.898305085	-1.23	<30	60954.962	<60	>=30	60-90	>=1.8
663	3795	2011-2012	65955	3	91	80	Female	Non-Hispanic White	1.16	More than high school	23.7	93.6	mild	never	no	134	71	preDM	0	5.551	21	26	76.91	267.7	1.118	5.33	1.63	3.181	66602.596	63.11711297	15.4	1.55	<30	16650.649	>=60	<25	60-90	<1.3
664	3814	2011-2012	65974	1	91	63	Female	Non-Hispanic White	4.49	More than high school	25.8	94.3	mild	former	yes	149	79	no	0	5.607	28	29	58.34	285.5	0.858	6.47	2.07	4.008	287755.997	94.31319287	15.45454545	19.86	<30	71938.99925	>=60	25-30	>=90	>=1.8
665	3818	2011-2012	65978	1	98	57	Male	Non-Hispanic White	2.86	More than high school	34.4	117.5	heavy	now	yes	141	79	preDM	1	6.384	27	21	83.98	416.4	1.671	5.61	0.83	4.008	292623.94	88.49885096	37.72575251	-3.56	>=30	73155.985	<60	>=30	60-90	>=1.8
666	3828	2011-2012	65988	2	92	20	Male	Other Race	0.23	More than high school	19.4	75.3	moderate	never	no	114	76	no	0	4.718	15	26	68.95	327.1	0.745	4.29	1.63	2.327	51544.123	129.9411997	3.259259259	-0.95	<30	12886.03075	<60	<25	>=90	<1.3
667	3831	2011-2012	65991	3	91	26	Female	Non-Hispanic White	2.75	More than high school	22.3	78.8	mild	now	no	125	66	no	0	4.829	14	16	77.79	178.4	1.016	4.86	1.53	2.87	280763.513	90.96764103	10.23809524	1.86	<30	70190.87825	<60	<25	>=90	>=1.8
668	3832	2011-2012	65992	1	96	61	Female	Non-Hispanic Black	5	High school or equivalent	27.9	95.3	never	never	no	108	60	no	0	5.94	12	21	94.59	368.8	1.276	2.87	1.14	1.138	43483.567	64.74567895	10.59322034	-1.38	<30	10870.89175	>=60	25-30	60-90	>=1.8
669	3840	2011-2012	66000	2	92	54	Female	Other Race	5	More than high school	25.7	89	mild	former	no	127	78	no	0	4.774	44	33	58.34	345	0.813	4.89	2.17	2.353	50852.536	100.4683364	6.785714286	2.06	<30	12713.134	<60	25-30	>=90	>=1.8
670	3850	2011-2012	66010	1	101	40	Female	Non-Hispanic White	1.17	High school or equivalent	18.1	72.7	never	never	no	106	75	no	0	4.885	17	21	65.42	178.4	0.497	4.91	2.07	2.612	70089.522	101.661102	6.166666667	1.08	<30	17522.3805	<60	<25	>=90	<1.3
671	3855	2011-2012	66015	2	96	64	Male	Other Race	3.06	More than high school	25.1	92.3	never	never	yes	95	53	preDM	0	5.884	11	23	92.82	339	2.066	4.71	0.93	2.819	16491.825	74.65043585	8	3.23	<30	4122.95625	>=60	25-30	60-90	>=1.8
672	3866	2011-2012	66026	2	99	65	Male	Non-Hispanic White	5	More than high school	36.3	121.3	heavy	never	yes	130	80	no	0	6.106	24	28	96.36	386.6	1.389	6.15	1.34	4.163	145727.135	70.85178935	4.102564103	1.43	<30	36431.78375	>=60	>=30	60-90	>=1.8
673	3872	2011-2012	66032	2	90	36	Male	Other Race	3.45	More than high school	29	96.7	moderate	never	no	106	53	no	0	5.495	24	20	76.02	333.1	2.393	5.66	0.91	3.672	65355.444	111.5595789	4.162162162	-3.38	<30	16338.861	<60	25-30	>=90	>=1.8
674	3876	2011-2012	66036	1	94	70	Female	Non-Hispanic White	3.97	More than high school	22.6	87	mild	never	no	110	59	preDM	0	5.329	23	30	75.14	279.6	1.614	5.15	1.71	2.689	126629.983	69.6411503	5	-0.19	<30	31657.49575	>=60	<25	60-90	>=1.8
675	3880	2011-2012	66040	2	103	24	Female	Other Race	1.98	More than high school	26.2	77.8	moderate	never	no	102	55	no	0	4.552	13	22	65.42	220.1	1.344	5.04	1.42	3	99966.357	113.754042	23.67346939	-1.04	<30	24991.58925	<60	25-30	>=90	>=1.8
676	3889	2011-2012	66049	3	90	73	Male	Other Race	3.04	More than high school	32.5	121.2	heavy	never	yes	144	69	no	1	5.829	19	15	110.5	458	2.529	5.12	1.16	2.793	24451.455	56.75828194	44.55445545	-2.45	>=30	6112.86375	>=60	>=30	<60	>=1.8
677	3892	2011-2012	66052	1	101	43	Female	Non-Hispanic White	2.31	More than high school	46.9	140.1	mild	never	yes	123	86	preDM	0	6.717	29	26	72.49	404.5	4.256	5.69	1.16	2.586	335196.513	87.92305307	20	0.23	<30	83799.12825	<60	>=30	60-90	>=1.8
678	3894	2011-2012	66054	1	97	33	Female	Non-Hispanic White	5	More than high school	23.5	82.1	mild	former	no	114	77	no	0	5.218	11	17	85.75	196.3	1.061	3.21	1.27	1.448	218948.799	76.98466	12.16438356	2.99	<30	54737.19975	<60	<25	60-90	>=1.8
679	3896	2011-2012	66056	1	101	57	Female	Non-Hispanic Black	5	High school or equivalent	21.5	77.9	moderate	former	yes	147	76	no	0	5.162	13	15	75.14	202.2	0.61	7.55	3.57	3.698	64604.793	87.95718091	6.52173913	1.64	<30	16151.19825	<60	<25	60-90	>=1.8
680	3898	2011-2012	66058	1	91	74	Female	Non-Hispanic White	3.4	More than high school	29.4	104	former	former	no	120	64	preDM	0	6.217	31	30	61.88	339	2.134	7.21	1.4	4.836	139880.142	85.62624137	5.631067961	-2.51	<30	34970.0355	>=60	25-30	60-90	>=1.8
681	3908	2011-2012	66068	1	103	76	Male	Other Race	0.65	High school or equivalent	21.2	84.7	mild	former	yes	157	55	DM	1	7.66	15	24	115.8	571	1.773	5.28	1.45	3.026	18203.735	52.51219786	289.7196262	-3.09	>=30	4550.93375	>=60	<25	<60	<1.3
682	3911	2011-2012	66071	1	90	65	Female	Non-Hispanic Black	3.85	High school or equivalent	34.6	105.1	mild	former	yes	130	93	DM	1	7.383	26	23	108.73	428.3	1.468	4.97	1.47	2.819	30050.126	53.19091864	6.806722689	-1.75	<30	7512.5315	>=60	>=30	<60	>=1.8
683	3919	2011-2012	66079	2	101	54	Male	Non-Hispanic Black	1.65	High school or equivalent	33.8	110.9	former	now	yes	123	74	no	1	5.94	22	24	66.3	356.9	0.994	2.84	0.93	1.448	73427.097	120.2238178	61.16504854	-3.77	>=30	18356.77425	<60	>=30	>=90	1.3-1.8
684	3929	2011-2012	66089	1	102	34	Male	Non-Hispanic White	0.92	More than high school	23.4	91.7	moderate	never	no	120	69	no	0	4.996	11	15	88.4	297.4	1.106	4.58	1.14	2.922	45666.519	97.76260276	7.142857143	4.93	<30	11416.62975	<60	<25	>=90	<1.3
685	3933	2011-2012	66093	1	100	41	Female	Non-Hispanic Black	2.15	More than high school	39	114.5	heavy	never	no	126	73	DM	0	12.379	18	17	64.53	333.1	2.281	5.82	0.96	3.827	76136.46	118.3023765	4.838709677	1.32	<30	19034.115	<60	>=30	>=90	>=1.8
686	3934	2011-2012	66094	2	101	25	Male	Other Race	2.8	More than high school	20.8	78.7	mild	now	no	109	59	no	0	5.44	10	18	98.12	428.3	0.858	3.93	1.34	2.198	33300.991	91.79817296	2.752293578	-1.4	<30	8325.24775	<60	<25	>=90	>=1.8
687	3935	2011-2012	66095	1	90	72	Female	Non-Hispanic White	3.3	More than high school	42.2	116.5	former	never	no	114	58	DM	0	5.773	13	18	78.68	362.8	1.626	6.18	1.68	3.75	145058.089	64.95601839	7.5	3.44	<30	36264.52225	>=60	>=30	60-90	>=1.8
688	3941	2011-2012	66101	2	98	20	Female	Non-Hispanic White	0.23	High school or equivalent	25	90.7	former	never	no	111	76	no	0	4.663	12	21	61	327.1	0.485	4.47	1.42	2.819	131394.893	125.7197088	7.360594796	-4.62	<30	32848.72325	<60	25-30	>=90	<1.3
689	3943	2011-2012	66103	1	100	25	Male	Non-Hispanic White	1.31	More than high school	37.2	124.7	mild	never	no	120	74	no	0	5.495	22	19	113.15	499.6	1.784	5.17	1.19	3.155	223419.282	77.27031197	3.28358209	-0.39	<30	55854.8205	<60	>=30	60-90	1.3-1.8
690	3944	2011-2012	66104	2	101	50	Female	Non-Hispanic White	0.3	Less than high school	20.5	81	former	now	yes	160	67	no	0	4.774	11	18	77.79	113	1.027	3.21	0.78	1.965	79734.162	76.85442835	8.723404255	-4.13	<30	19933.5405	<60	<25	60-90	<1.3
691	3949	2011-2012	66109	1	98	32	Male	Non-Hispanic White	0.81	Less than high school	37.7	127.7	heavy	never	no	120	89	preDM	0	6.328	52	32	81.33	362.8	0.971	3.1	1.01	1.655	36922.922	109.6616498	6.111111111	-3.76	<30	9230.7305	<60	>=30	>=90	<1.3
692	3950	2011-2012	66110	1	99	63	Male	Non-Hispanic White	5	More than high school	29.3	107	mild	former	yes	138	86	no	0	5.995	20	23	80.44	350.9	1.287	4.45	1.06	2.793	248173.326	89.37579512	6.257668712	1.36	<30	62043.3315	>=60	25-30	60-90	>=1.8
693	3951	2011-2012	66111	1	97	26	Female	Non-Hispanic Black	5	More than high school	24.2	81.9	moderate	never	no	108	53	no	0	5.218	15	18	56.58	237.9	0.632	3.31	1.32	1.707	70282.728	142.4270872	3.977900552	-1.14	<30	17570.682	<60	<25	>=90	>=1.8
694	3963	2011-2012	66123	2	95	29	Female	Non-Hispanic White	0.79	More than high school	45.9	126.5	former	now	no	121	68	no	0	5.94	30	25	68.95	333.1	1.671	5.3	1.14	3.388	73950.785	103.0556612	7.112676056	-4.59	<30	18487.69625	<60	>=30	>=90	<1.3
695	3966	2011-2012	66126	2	101	67	Female	Non-Hispanic Black	4.08	More than high school	23.3	83	former	never	no	139	68	no	0	5.44	12	19	77.79	267.7	1.185	5.46	1.34	3.569	54275.985	78.62338125	12.28571429	-4.97	<30	13568.99625	>=60	<25	60-90	>=1.8
696	3971	2011-2012	66131	1	101	36	Female	Non-Hispanic White	0.97	More than high school	25.1	96.4	former	now	no	91	60	no	0	5.607	8	13	61.88	190.3	1.829	4.22	1.14	2.25	152986.435	111.8241068	5.636363636	-2.1	<30	38246.60875	<60	25-30	>=90	<1.3
697	3976	2011-2012	66136	3	90	27	Male	Non-Hispanic White	3.64	More than high school	22.8	86	never	never	no	98	70	no	0	4.607	11	16	94.59	422.3	1.264	5.38	0.98	3.827	226754.892	94.62437603	4.054054054	-0.54	<30	56688.723	<60	<25	>=90	>=1.8
698	3997	2011-2012	66157	1	95	80	Male	Non-Hispanic White	2.72	High school or equivalent	23.4	93	mild	former	yes	141	54	no	0	5.607	16	26	83.98	309.3	0.621	3.49	1.37	1.836	110277.346	75.29572987	14.38356164	-0.17	<30	27569.3365	>=60	<25	60-90	>=1.8
699	4002	2011-2012	66162	2	93	60	Female	Other Race	5	More than high school	30.3	97.3	mild	never	no	138	83	DM	1	6.883	22	29	53.92	356.9	1.231	6.36	1.32	4.474	26100.556	98.85101688	56.33333333	-4.13	>=30	6525.139	>=60	>=30	>=90	>=1.8
700	4007	2011-2012	66167	1	95	23	Female	Other Race	0.73	More than high school	25	83.7	mild	never	no	125	70	no	0	4.829	13	17	57.46	356.9	0.858	3.98	1.58	2.017	26901.142	125.540533	1.656804734	10.18	<30	6725.2855	<60	25-30	>=90	<1.3
701	4017	2011-2012	66177	1	98	44	Male	Non-Hispanic Black	1.57	Less than high school	26.4	85.7	former	never	yes	153	101	no	0	4.829	28	24	98.12	345	0.598	5.38	1.5	3.595	65013.009	92.86204657	8.75	6.47	<30	16253.25225	<60	25-30	>=90	1.3-1.8
702	4018	2011-2012	66178	2	96	62	Male	Non-Hispanic Black	3.06	High school or equivalent	38	123.1	mild	never	yes	104	53	preDM	0	5.662	23	26	70.72	232	0.666	3.54	1.4	1.836	27350.2	110.6788653	6.180257511	0.67	<30	6837.55	>=60	>=30	>=90	>=1.8
703	4019	2011-2012	66179	1	92	23	Female	Other Race	0.33	More than high school	17.8	63.1	heavy	never	no	94	69	no	0	3.997	16	20	55.69	249.8	0.723	4.53	1.81	2.379	38735.76	126.8380107	10.55172414	-7.34	<30	9683.94	<60	<25	>=90	<1.3
704	4031	2011-2012	66191	1	92	56	Female	Non-Hispanic Black	0.98	Less than high school	28.2	100.5	never	never	yes	117	87	preDM	0	5.662	28	23	87.52	232	1.411	6.93	1.32	4.965	61275.237	73.66591438	10.47619048	0.68	<30	15318.80925	<60	25-30	60-90	<1.3
705	4034	2011-2012	66194	1	97	63	Female	Non-Hispanic White	5	More than high school	27.4	85.5	mild	former	no	105	78	preDM	0	6.217	22	27	65.42	220.1	0.847	5.33	1.99	2.948	374780.857	86.49430802	8.909090909	-0.83	<30	93695.21425	>=60	25-30	60-90	>=1.8
706	4041	2011-2012	66201	1	101	45	Male	Non-Hispanic White	2.24	More than high school	29.1	101.2	mild	never	yes	122	84	preDM	0	6.439	70	33	98.12	511.5	1.648	6.57	0.93	4.888	327850.488	79.76621918	7.150837989	-4.98	<30	81962.622	<60	25-30	60-90	>=1.8
707	4047	2011-2012	66207	1	96	80	Male	Non-Hispanic Black	3.58	Less than high school	38.2	134.5	never	never	yes	141	51	DM	1	6.717	20	21	70.72	458	1.694	5.02	1.03	3.207	20358.302	97.53290746	232.5581395	0.38	>=30	5089.5755	>=60	>=30	>=90	>=1.8
708	4050	2011-2012	66210	3	90	63	Female	Non-Hispanic Black	0.78	Less than high school	37.8	124.2	former	never	yes	97	56	DM	1	5.107	17	18	140.56	428.3	1.231	3.85	1.01	2.276	23087.501	39.5498782	27.40740741	3.44	<30	5771.87525	>=60	>=30	<60	<1.3
709	4062	2011-2012	66222	2	99	47	Male	Non-Hispanic Black	1.63	Less than high school	21.8	81.8	heavy	never	yes	152	105	preDM	0	5.662	38	61	75.14	339	0.689	5.09	2.28	2.508	58141.309	119.9512496	4.222222222	1.2	<30	14535.32725	<60	<25	>=90	1.3-1.8
710	4069	2011-2012	66229	1	99	71	Male	Non-Hispanic White	5	More than high school	27.1	102.2	mild	former	yes	144	82	no	0	5.495	31	32	101.66	356.9	0.982	4.37	1.4	2.534	126463.295	63.6665418	5.950920245	2.57	<30	31615.82375	>=60	25-30	60-90	>=1.8
711	4074	2011-2012	66234	1	92	26	Male	Non-Hispanic White	1.62	More than high school	31.1	101.5	mild	never	yes	119	91	no	0	5.551	29	25	83.1	333.1	0.903	4.78	1.27	3.103	241031.093	111.4466946	5.513513514	0.14	<30	60257.77325	<60	>=30	>=90	1.3-1.8
712	4075	2011-2012	66235	1	91	33	Female	Other Race	0.89	More than high school	22.8	83.2	mild	former	no	116	75	no	0	6.051	13	19	50.39	279.6	1.298	4.19	1.16	2.431	42251.498	122.1918162	10.17094017	1.35	<30	10562.8745	<60	<25	>=90	<1.3
713	4078	2011-2012	66238	2	100	61	Female	Non-Hispanic Black	2.39	Less than high school	34.4	97.6	mild	never	yes	126	64	no	0	5.273	19	22	98.12	398.5	1.885	5.61	1.53	3.233	30923.614	61.93559231	2.840909091	-5.18	<30	7730.9035	>=60	>=30	60-90	>=1.8
714	4080	2011-2012	66240	1	92	47	Male	Other Race	3.69	More than high school	25.8	86.7	mild	never	no	105	73	no	0	5.662	37	32	95.47	339	1.592	4.89	1.45	2.715	39078.083	81.30245608	3.783783784	1.7	<30	9769.52075	<60	25-30	60-90	>=1.8
715	4081	2011-2012	66241	2	90	50	Female	Other Race	1.19	More than high school	29.6	114	moderate	never	yes	127	77	preDM	0	6.828	22	22	55.69	273.6	1.739	5.61	1.27	3.543	44331.546	104.9250371	6.290322581	0.17	<30	11082.8865	<60	25-30	>=90	<1.3
716	4083	2011-2012	66243	2	97	39	Female	Non-Hispanic Black	5	More than high school	28.9	96.2	moderate	never	no	110	75	no	0	5.051	17	21	68.95	273.6	0.711	5.69	1.68	3.672	69867.852	110.741381	4.968944099	-3.94	<30	17466.963	<60	25-30	>=90	>=1.8
717	4087	2011-2012	66247	2	98	70	Male	Non-Hispanic Black	0.75	Less than high school	32	115.1	mild	former	yes	125	67	no	0	5.551	13	17	101.66	321.2	1.163	5.09	1.34	3.207	26349.992	74.1191626	2.962962963	-0.79	<30	6587.498	>=60	>=30	60-90	<1.3
718	4089	2011-2012	66249	2	96	27	Female	Other Race	2.39	More than high school	19.1	77.8	mild	never	no	90	54	no	0	4.94	11	15	61	237.9	0.824	5.35	2.12	2.845	47655.91	119.6873099	19.14473684	1.14	<30	11913.9775	<60	<25	>=90	>=1.8
719	4093	2011-2012	66253	1	101	38	Female	Non-Hispanic White	2.6	More than high school	28.4	103.8	mild	former	yes	113	78	DM	0	7.882	17	13	56.58	285.5	1.411	4.71	1.09	2.974	167137.305	113.5632934	15.46218487	0.8	<30	41784.32625	<60	25-30	>=90	>=1.8
720	4094	2011-2012	66254	2	93	64	Female	Other Race	2.31	Less than high school	30.3	98.5	mild	never	yes	135	77	DM	0	8.215	18	16	58.34	291.5	1.434	5.12	1.27	3.207	23436.323	93.65300052	7.191011236	-0.96	<30	5859.08075	>=60	>=30	>=90	>=1.8
721	4099	2011-2012	66259	1	92	45	Male	Other Race	2.3	High school or equivalent	23.2	80.1	moderate	former	no	98	69	no	0	5.662	31	33	81.33	333.1	0.756	5.22	1.78	3.103	38875.941	100.0909948	2.016806723	-1.83	<30	9718.98525	<60	<25	>=90	>=1.8
722	4101	2011-2012	66261	2	91	52	Male	Non-Hispanic White	0.9	High school or equivalent	28.3	94.4	former	now	yes	167	99	no	0	5.273	25	21	72.49	339	2.168	7.76	1.24	5.534	333656.838	101.6707934	6.960784314	3.22	<30	83414.2095	<60	25-30	>=90	<1.3
723	4123	2011-2012	66283	2	98	33	Female	Non-Hispanic Black	3.36	More than high school	40.2	119.6	moderate	never	no	105	81	DM	0	7.66	19	19	82.21	362.8	1.411	6.31	1.27	4.396	74671.902	93.38151896	3.609022556	3.1	<30	18667.9755	<60	>=30	>=90	>=1.8
724	4129	2011-2012	66289	2	94	41	Male	Non-Hispanic White	3.21	More than high school	34.5	108.4	former	former	no	93	63	no	0	5.495	36	25	71.6	404.5	1.185	4.22	1.11	2.56	238501.003	110.3937864	4.736842105	-3.31	<30	59625.25075	<60	>=30	>=90	>=1.8
725	4130	2011-2012	66290	2	102	63	Female	Non-Hispanic White	4.08	More than high school	23.4	91.4	mild	never	no	116	65	preDM	0	4.663	16	22	74.26	202.2	0.711	5.02	1.6	3.077	337995.46	74.20531634	5.670103093	1.96	<30	84498.865	>=60	<25	60-90	>=1.8
726	4140	2011-2012	66300	2	101	35	Female	Non-Hispanic White	0.59	High school or equivalent	35.4	104.6	moderate	former	yes	119	66	no	0	5.607	13	15	52.16	261.7	0.689	4.84	1.4	3.129	60650.691	119.1278031	3.473684211	3.92	<30	15162.67275	<60	>=30	>=90	<1.3
727	4148	2011-2012	66308	1	101	55	Male	Non-Hispanic White	0.86	More than high school	22.7	87	mild	now	yes	121	78	no	0	5.218	28	26	84.86	368.8	0.756	4.71	1.63	2.741	76492.174	88.62189924	17.81512605	6.04	<30	19123.0435	<60	<25	60-90	<1.3
728	4149	2011-2012	66309	1	102	30	Female	Other Race	1.02	Less than high school	21.6	72.7	heavy	now	no	128	60	no	1	4.607	19	27	60.11	255.8	0.869	4.09	1.76	1.94	63071.931	117.7556543	54.46808511	9.11	>=30	15767.98275	<60	<25	>=90	<1.3
729	4151	2011-2012	66311	2	103	39	Male	Other Race	5	More than high school	23	92.4	mild	former	no	94	65	DM	1	7.383	15	18	59.23	487.7	1.106	3.96	1.09	2.353	32170.788	121.0366044	391.5662651	-2.48	>=30	8042.697	<60	<25	>=90	>=1.8
730	4157	2011-2012	66317	1	91	43	Male	Non-Hispanic White	2.77	More than high school	26.3	97	heavy	never	no	107	67	no	0	5.218	23	22	76.91	356.9	1.389	4.4	1.24	2.508	273629.703	105.7031809	5	1.74	<30	68407.42575	<60	25-30	>=90	>=1.8
731	4160	2011-2012	66320	2	90	21	Male	Non-Hispanic Black	0.96	Less than high school	26.7	83	moderate	never	no	95	62	no	0	5.718	13	21	78.68	273.6	0.373	3.54	1.42	1.94	49828.769	141.2915539	2.189781022	0.39	<30	12457.19225	<60	25-30	>=90	<1.3
732	4161	2011-2012	66321	1	103	71	Female	Non-Hispanic White	2.51	More than high school	31.5	101	mild	never	yes	151	70	preDM	0	5.329	19	26	44.2	285.5	1.829	5.74	1.63	3.284	141723.695	97.68665957	18.90909091	0.3	<30	35430.92375	>=60	>=30	>=90	>=1.8
733	4165	2011-2012	66325	1	96	24	Female	Non-Hispanic Black	2.95	High school or equivalent	18.1	77	moderate	never	yes	95	50	no	0	4.274	13	19	59.23	202.2	0.406	4.22	1.53	2.508	55099.703	142.2815858	4.279475983	2.52	<30	13774.92575	<60	<25	>=90	>=1.8
734	4171	2011-2012	66331	1	95	77	Female	Non-Hispanic White	0.83	More than high school	33.9	101.4	former	never	no	119	62	DM	0	6.717	13	17	73.37	255.8	1.039	4.76	1.58	2.715	76092.702	68.23587154	8.518518519	-1.36	<30	19023.1755	>=60	>=30	60-90	<1.3
735	4175	2011-2012	66335	1	98	35	Male	Non-Hispanic White	0.74	Less than high school	28.3	102	heavy	now	yes	125	82	preDM	0	4.885	121	61	65.42	410.4	2.314	5.79	1.37	3.362	33504.459	119.5039456	8.35443038	-1.39	<30	8376.11475	<60	25-30	>=90	<1.3
736	4178	2011-2012	66338	1	98	31	Female	Non-Hispanic White	2.2	More than high school	24.7	84.7	moderate	never	no	109	75	no	0	4.718	14	18	61	267.7	0.474	3.49	1.4	1.888	176649.755	116.3710893	6.458333333	1.6	<30	44162.43875	<60	<25	>=90	>=1.8
737	4181	2011-2012	66341	1	100	51	Male	Non-Hispanic White	4.63	More than high school	28	95.5	mild	never	yes	119	75	no	0	5.829	25	18	111.38	327.1	0.96	4.29	1.24	2.612	292566.262	65.60878433	6.219512195	-1.69	<30	73141.5655	<60	25-30	60-90	>=1.8
738	4182	2011-2012	66342	1	101	32	Female	Non-Hispanic White	0	High school or equivalent	25.3	96.5	heavy	now	no	106	71	no	0	5.995	17	26	56.58	243.9	2.269	7.53	1.24	5.25	79360.727	118.4520245	4.4	-4.41	<30	19840.18175	<60	25-30	>=90	<1.3
739	4183	2011-2012	66343	1	98	20	Female	Non-Hispanic White	0.27	More than high school	34.6	118.4	heavy	now	no	115	89	preDM	0	5.662	99	51	63.65	416.4	1.016	4.42	1.34	2.612	237163.211	120.9361125	7.56097561	1.49	<30	59290.80275	<60	>=30	>=90	<1.3
740	4189	2011-2012	66349	2	100	24	Female	Other Race	1.62	High school or equivalent	30.5	93	heavy	never	no	100	58	preDM	0	6.439	21	20	40.66	273.6	1.411	5.84	1.24	3.957	26943.432	139.6800509	7.066666667	-2.37	<30	6735.858	<60	>=30	>=90	1.3-1.8
741	4195	2011-2012	66355	1	95	62	Male	Other Race	0.73	High school or equivalent	22.9	89	former	never	yes	142	79	DM	0	8.16	19	23	74.26	416.4	3.477	4.47	0.85	2.017	14009.265	93.83987145	8.965517241	-4	<30	3502.31625	>=60	<25	>=90	<1.3
742	4202	2011-2012	66362	1	92	55	Female	Non-Hispanic White	1.05	More than high school	24.5	93.6	mild	never	yes	125	70	no	0	4.33	10	18	50.39	214.1	1.298	5.79	1.55	3.646	82127.48	104.6949146	25.58823529	9.95	<30	20531.87	<60	<25	>=90	<1.3
743	4218	2011-2012	66378	1	101	59	Female	Non-Hispanic White	2.42	High school or equivalent	32.9	115	never	never	no	122	75	no	0	5.051	35	33	68.95	345	1.152	5.92	1.58	3.827	357189.364	83.47363174	6.581818182	-1.97	<30	89297.341	<60	>=30	60-90	>=1.8
744	4224	2011-2012	66384	1	99	38	Female	Non-Hispanic White	1.12	High school or equivalent	23.1	85.6	mild	never	yes	162	90	preDM	0	5.718	14	18	65.42	249.8	1.231	4.68	1.09	3.026	41999.474	103.0994423	18.86363636	-4.2	<30	10499.8685	<60	<25	>=90	<1.3
745	4231	2011-2012	66391	3	91	28	Female	Non-Hispanic White	5	More than high school	21.4	79.5	heavy	never	no	118	47	no	0	5.551	17	17	57.46	339	1.332	5.59	1.24	3.724	275436.741	121.2077001	6.571428571	6.74	<30	68859.18525	<60	<25	>=90	>=1.8
746	4233	2011-2012	66393	1	92	43	Female	Other Race	2.06	More than high school	24	84.2	moderate	former	yes	144	89	no	0	5.607	20	24	53.92	226	0.689	5.17	1.68	3.181	55609.961	111.3894134	13.37349398	-0.92	<30	13902.49025	<60	<25	>=90	>=1.8
747	4236	2011-2012	66396	2	102	46	Female	Other Race	1.08	Less than high school	41.2	128.1	mild	former	yes	111	61	DM	0	11.102	26	27	45.08	226	1.942	4.91	0.88	3.155	40345.011	115.6843445	29.3814433	1.74	<30	10086.25275	<60	>=30	>=90	<1.3
748	4269	2011-2012	66429	2	90	69	Female	Other Race	0.73	More than high school	23.2	81	never	never	yes	162	46	DM	0	6.772	11	21	72.49	345	1.355	5.38	1.27	3.491	28074.481	73.24588337	6.404494382	-2.38	<30	7018.62025	>=60	<25	60-90	<1.3
749	4271	2011-2012	66431	2	94	23	Female	Non-Hispanic White	2.94	More than high school	24	79.5	moderate	now	no	112	49	no	0	5.162	13	18	72.49	285.5	0.982	5.38	1.47	3.465	193281.702	101.1853854	18.84615385	-3.61	<30	48320.4255	<60	<25	>=90	>=1.8
750	4276	2011-2012	66436	1	100	74	Female	Other Race	1.18	Less than high school	35.3	110.1	never	former	yes	122	68	no	0	5.829	26	26	63.65	398.5	2.123	3.88	1.01	1.888	41149.241	82.75903594	10.32	6.13	<30	10287.31025	>=60	>=30	60-90	<1.3
751	4278	2011-2012	66438	2	93	44	Male	Other Race	0.58	More than high school	30.6	109.6	moderate	never	no	123	81	no	0	5.94	28	24	91.94	487.7	1.987	6.7	1.16	4.629	77029.972	86.9104369	6.355140187	-2.2	<30	19257.493	<60	>=30	60-90	<1.3
752	4279	2011-2012	66439	2	98	48	Female	Mexican American	1.53	High school or equivalent	35.5	98.4	heavy	now	no	124	79	no	0	5.718	11	18	45.08	226	0.587	4.86	2.22	2.379	89568.183	114.0704322	6.818181818	2.24	<30	22392.04575	<60	>=30	>=90	1.3-1.8
753	4283	2011-2012	66443	3	92	38	Female	Mexican American	1.12	Less than high school	34.9	108.5	mild	former	yes	160	68	DM	1	6.828	26	28	35.36	237.9	2.552	6	1.29	3.543	150124.427	132.5541878	130.7692308	-0.74	>=30	37531.10675	<60	>=30	>=90	<1.3
754	4291	2011-2012	66451	1	90	52	Female	Other Race	5	High school or equivalent	30	97	heavy	former	no	111	66	no	0	5.273	20	20	60.11	237.9	0.869	5.48	1.24	3.853	59316.276	100.893976	3.076923077	11.55	<30	14829.069	<60	>=30	>=90	>=1.8
755	4296	2011-2012	66456	2	101	70	Female	Non-Hispanic Black	2.64	High school or equivalent	31.5	88.3	never	never	yes	137	79	no	0	5.162	16	24	91.94	428.3	1.073	3.65	1.45	1.707	49622.761	62.9050781	14.71264368	-3.15	<30	12405.69025	>=60	>=30	60-90	>=1.8
756	4297	2011-2012	66457	1	90	70	Male	Other Race	0.79	Less than high school	40.5	125.6	former	never	yes	142	85	DM	1	6.273	16	17	118.46	297.4	1.4	4.58	1.11	2.819	38533.011	53.2937156	142.6153846	-2.34	>=30	9633.25275	>=60	>=30	<60	<1.3
757	4300	2011-2012	66460	2	92	37	Male	Non-Hispanic White	5	More than high school	22.7	86.1	mild	never	no	112	82	no	0	5.662	24	22	61	416.4	0.858	6.44	1.4	4.655	196780.836	121.2740837	5.628415301	1.84	<30	49195.209	<60	<25	>=90	>=1.8
758	4304	2011-2012	66464	2	103	21	Male	Mexican American	0.79	More than high school	29.7	100.4	mild	never	no	113	71	no	0	5.384	21	26	85.75	291.5	2.631	3.67	0.83	1.629	75427.606	111.1285117	5.28	-0.01	<30	18856.9015	<60	25-30	>=90	<1.3
759	4313	2011-2012	66473	1	101	56	Male	Non-Hispanic White	5	More than high school	23.2	97.2	former	former	yes	132	94	preDM	0	5.829	41	33	97.24	398.5	2.743	5.43	1.32	2.845	327029.084	74.64701847	4.252873563	-1.4	<30	81757.271	<60	<25	60-90	>=1.8
760	4316	2011-2012	66476	1	101	60	Male	Non-Hispanic White	5	More than high school	34	119.5	mild	former	yes	97	50	no	0	6.051	30	33	89.28	517.5	2.168	5.56	1.29	3.284	283871.635	80.46901317	3.726708075	-0.62	<30	70967.90875	>=60	>=30	60-90	>=1.8
761	4334	2011-2012	66494	1	101	47	Male	Non-Hispanic White	1.65	More than high school	36.8	113.3	heavy	former	no	129	85	no	0	5.718	77	42	81.33	374.7	1.852	2.79	1.19	0.75	69349.977	98.69462531	5.555555556	14.63	<30	17337.49425	<60	>=30	>=90	1.3-1.8
762	4337	2011-2012	66497	2	96	25	Female	Non-Hispanic Black	0.4	Less than high school	33.4	93.9	mild	never	no	107	57	no	0	5.329	14	20	66.3	226	0.7	4.55	1.22	3.026	38119.985	128.1190658	2.5	-1.64	<30	9529.99625	<60	>=30	>=90	<1.3
763	4343	2011-2012	66503	1	96	50	Male	Non-Hispanic Black	5	High school or equivalent	32.1	103.6	mild	now	no	112	57	DM	0	5.607	43	27	85.75	440.2	1.05	5.17	1.47	3.207	49515.644	104.7905685	24.45783133	-2.24	<30	12378.911	<60	>=30	>=90	>=1.8
764	4344	2011-2012	66504	2	94	70	Male	Non-Hispanic White	3.23	More than high school	36.1	125.1	moderate	former	yes	152	55	DM	1	11.158	24	26	69.84	428.3	1.84	3.8	1.45	1.5	123009.717	90.97780284	41.2	-5.5	>=30	30752.42925	>=60	>=30	>=90	>=1.8
765	4345	2011-2012	66505	1	102	34	Male	Mexican American	0.92	High school or equivalent	23	83.2	moderate	never	no	115	54	no	0	5.051	25	25	67.18	285.5	1.31	6.49	1.66	4.241	76738.147	119.0344985	13.75	5.13	<30	19184.53675	<60	<25	>=90	<1.3
766	4347	2011-2012	66507	2	94	74	Male	Non-Hispanic White	4.59	High school or equivalent	31.2	110.5	moderate	never	yes	168	56	no	1	5.107	34	29	78.68	333.1	1.106	6.05	1.16	4.37	121807.495	84.22826987	35.80952381	0.02	>=30	30451.87375	>=60	>=30	60-90	>=1.8
767	4355	2011-2012	66515	1	90	70	Female	Other Race	5	More than high school	20.2	75.6	mild	never	no	117	64	no	0	5.44	17	20	53.04	273.6	0.824	5.56	2.15	3.026	30675.462	92.64785749	7	3.74	<30	7668.8655	>=60	<25	>=90	>=1.8
768	4358	2011-2012	66518	2	95	80	Female	Non-Hispanic Black	1.65	Less than high school	32	102.7	former	never	yes	146	71	no	1	4.885	18	24	95.47	291.5	0.847	4.01	1.6	2.017	41395.48	56.02246032	18.27956989	-2.26	<30	10348.87	>=60	>=30	<60	1.3-1.8
769	4365	2011-2012	66525	1	101	47	Male	Non-Hispanic White	1.98	High school or equivalent	28.8	106.6	never	never	yes	143	93	no	0	5.162	34	31	71.6	362.8	1.739	4.22	0.93	2.483	304749.566	105.8376335	7.567567568	4.2	<30	76187.3915	<60	25-30	>=90	>=1.8
770	4378	2011-2012	66538	2	100	69	Male	Non-Hispanic White	3.4	More than high school	25.2	100	former	former	yes	102	58	no	0	5.107	31	29	100.78	440.2	1.073	2.77	0.8	1.474	204627.193	65.25270016	4.338235294	1.93	<30	51156.79825	>=60	25-30	60-90	>=1.8
771	4382	2011-2012	66542	2	96	63	Male	Non-Hispanic Black	2.7	More than high school	35	124.5	mild	now	yes	169	73	DM	1	9.992	36	38	63.65	303.3	0.96	3.83	1.19	2.198	20242.981	114.7678577	1024.305556	1.16	>=30	5060.74525	>=60	>=30	>=90	>=1.8
772	4391	2011-2012	66551	2	98	22	Male	Non-Hispanic White	0.75	Less than high school	32.8	98.2	heavy	now	no	129	59	no	0	4.996	31	NA	80.44	297.4	1.016	4.01	0.85	2.689	79110.818	119.2067177	6.060606061	0.44	<30	19777.7045	<60	>=30	>=90	<1.3
773	4392	2011-2012	66552	2	93	45	Male	Other Race	2.69	More than high school	26.5	101.5	mild	now	no	127	80	no	0	5.495	46	41	76.02	386.6	1.106	3.31	0.75	2.043	66426.215	104.7249358	3.7	-2.23	<30	16606.55375	<60	25-30	>=90	>=1.8
774	4398	2011-2012	66558	1	97	54	Female	Non-Hispanic White	5	High school or equivalent	22.5	92.4	mild	former	no	124	73	no	0	5.329	31	26	60.11	255.8	1.005	4.53	1.4	2.664	366275.649	99.4864041	4.87804878	-2.67	<30	91568.91225	<60	<25	>=90	>=1.8
775	4401	2011-2012	66561	1	102	42	Female	Mexican American	0.54	Less than high school	31.8	100.9	never	never	no	NA	NA	no	0	5.273	18	18	47.74	285.5	1.784	5.15	1.09	3.233	78276.058	116.7644498	10.34482759	-2.79	<30	19569.0145	<60	>=30	>=90	<1.3
776	4403	2011-2012	66563	1	96	73	Female	Non-Hispanic Black	2.64	More than high school	34.6	107.5	mild	never	yes	142	79	DM	0	6.051	20	22	81.33	362.8	0.61	4.99	1.97	2.741	35627.509	71.43437928	10.25	-2.51	<30	8906.87725	>=60	>=30	60-90	>=1.8
777	4408	2011-2012	66568	2	95	52	Female	Non-Hispanic White	5	More than high school	24.7	89	mild	former	no	112	69	no	0	5.218	11	17	45.97	190.3	0.723	3.1	1.16	1.603	307365.078	110.203546	7.25	0.52	<30	76841.2695	<60	<25	>=90	>=1.8
778	4422	2011-2012	66582	1	90	55	Male	Other Race	5	More than high school	20.2	75.5	moderate	never	no	134	87	no	0	5.495	42	53	72.49	410.4	0.711	5.28	2.28	2.664	32313.2	99.55061743	5.273972603	-3.64	<30	8078.3	<60	<25	>=90	>=1.8
779	4427	2011-2012	66587	1	96	47	Male	Other Race	2.17	More than high school	24.8	93.3	mild	never	no	120	70	no	0	5.995	11	18	76.91	345	0.948	6.49	1.6	4.448	73689.246	102.7744238	4.102564103	3.48	<30	18422.3115	<60	<25	>=90	>=1.8
780	4431	2011-2012	66591	1	98	34	Male	Non-Hispanic White	3.7	More than high school	35	110.3	mild	former	yes	120	87	no	0	5.662	37	29	77.79	446.1	1.411	4.19	1.11	2.431	188180.694	112.0739954	3.915343915	-0.15	<30	47045.1735	<60	>=30	>=90	>=1.8
781	4434	2011-2012	66594	2	98	61	Male	Mexican American	1.19	High school or equivalent	33.6	115.5	former	now	yes	177	79	DM	1	8.604	45	26	83.1	315.2	1.705	6.49	0.96	4.758	16771.481	87.15471555	33.85416667	2.92	>=30	4192.87025	>=60	>=30	60-90	<1.3
782	4437	2011-2012	66597	2	96	54	Female	Mexican American	4.04	Less than high school	37.8	113.1	former	now	yes	111	74	DM	1	5.94	15	12	56.58	428.3	1.163	4.47	1.16	2.767	67532.653	101.4906314	155.4285714	3.55	>=30	16883.16325	<60	>=30	>=90	>=1.8
783	4439	2011-2012	66599	2	98	31	Female	Non-Hispanic White	1.61	High school or equivalent	38.6	127.7	former	now	no	112	77	no	0	5.607	15	17	50.39	243.9	2.653	5.87	1.19	3.465	150193.234	123.920633	6.403508772	-2.29	<30	37548.3085	<60	>=30	>=90	1.3-1.8
784	4443	2011-2012	66603	1	98	34	Female	Non-Hispanic White	0.5	High school or equivalent	27.4	94.6	moderate	never	no	112	68	no	0	5.107	36	29	63.65	297.4	1.535	6.21	1.6	3.905	59009.757	109.6088151	7.426470588	5.45	<30	14752.43925	<60	25-30	>=90	<1.3
785	4460	2011-2012	66620	1	92	64	Male	Non-Hispanic White	5	More than high school	26.6	99.1	mild	never	yes	143	96	no	0	5.551	19	22	83.1	374.7	0.813	5.56	2.15	3.051	378282.285	85.33724837	3.797468354	-2.88	<30	94570.57125	>=60	25-30	60-90	>=1.8
786	4475	2011-2012	66635	1	96	78	Male	Other Race	3.97	More than high school	26.9	99	mild	former	yes	136	64	DM	1	7.882	25	23	122.88	440.2	2.506	4.84	0.91	2.793	18317.894	48.19864129	12.29166667	-4.78	<30	4579.4735	>=60	25-30	<60	>=1.8
787	4482	2011-2012	66642	2	91	41	Male	Non-Hispanic White	4.19	High school or equivalent	28.2	101.1	mild	now	yes	114	74	no	0	5.273	26	22	72.49	380.7	0.903	5.02	0.88	3.724	281965.89	109.8384711	4.035874439	7.04	<30	70491.4725	<60	25-30	>=90	>=1.8
788	4484	2011-2012	66644	1	99	63	Female	Non-Hispanic White	1.16	More than high school	23.8	90	mild	never	yes	130	72	no	0	5.44	12	17	44.2	267.7	1.14	5.97	1.34	4.112	79203.54	103.3335313	13.28671329	5.81	<30	19800.885	>=60	<25	>=90	<1.3
789	4493	2011-2012	66653	2	97	42	Male	Non-Hispanic White	1.08	Less than high school	25.8	95.7	moderate	now	yes	128	82	no	0	5.329	21	19	88.4	339	2.721	5.72	1.42	3.051	43379.127	92.42016582	9.25170068	-3.26	<30	10844.78175	<60	25-30	>=90	<1.3
790	4503	2011-2012	66663	2	97	62	Male	Other Race	5	More than high school	23.2	89.9	mild	never	yes	112	82	no	0	5.607	27	30	96.36	345	1.434	5.02	1.53	2.845	16011.332	72.36075295	2.962962963	4.03	<30	4002.833	>=60	<25	60-90	>=1.8
791	4512	2011-2012	66672	2	94	60	Male	Mexican American	5	More than high school	30.6	107.7	mild	never	yes	107	75	no	0	5.718	18	21	99.01	249.8	2.552	8.2	1.6	5.431	15508.773	71.01476053	4.182692308	-2.81	<30	3877.19325	>=60	>=30	60-90	>=1.8
792	4530	2011-2012	66690	2	102	65	Male	Mexican American	0.67	Less than high school	30.9	109.8	mild	never	no	116	76	no	0	5.662	39	35	76.91	315.2	1.05	5.72	1.11	4.112	27071.933	90.56732142	4.356435644	-1.56	<30	6767.98325	>=60	>=30	>=90	<1.3
793	4539	2011-2012	66699	2	101	33	Male	Non-Hispanic White	1.88	More than high school	32.8	112	heavy	never	no	134	85	no	0	5.051	24	22	94.59	469.9	1.998	5.77	1.14	3.724	239271.115	90.71905543	2.739130435	-0.26	<30	59817.77875	<60	>=30	>=90	>=1.8
794	4541	2011-2012	66701	2	92	75	Male	Other Race	1.36	Less than high school	36.4	113.6	former	never	yes	115	70	DM	0	6.939	37	38	103.43	469.9	1.4	2.95	0.91	1.396	25003.637	60.62548652	13.73239437	0.85	<30	6250.90925	>=60	>=30	60-90	1.3-1.8
795	4550	2011-2012	66710	1	96	66	Male	Other Race	1.83	More than high school	24.7	99	never	never	no	138	69	DM	0	6.883	22	24	69.84	333.1	2.01	4.86	0.96	2.974	19455.74	93.57039228	5.940594059	-3.22	<30	4863.935	>=60	<25	>=90	>=1.8
796	4553	2011-2012	66713	2	103	60	Female	Non-Hispanic White	1.2	Less than high school	24.6	87.9	mild	now	no	122	55	no	0	4.829	12	18	64.53	184.4	0.734	6.21	1.68	4.189	73845.727	89.80150069	13.51351351	0.09	<30	18461.43175	>=60	<25	60-90	<1.3
797	4554	2011-2012	66714	2	102	21	Female	Mexican American	3.92	More than high school	19	74.2	never	never	no	110	75	no	0	5.162	16	21	46.85	208.2	0.395	4.19	2.09	1.914	124657.129	136.1592669	11.52777778	2.14	<30	31164.28225	<60	<25	>=90	>=1.8
798	4556	2011-2012	66716	2	96	30	Male	Non-Hispanic Black	0.65	More than high school	27.6	86.7	mild	former	no	113	71	no	0	5.94	49	37	108.73	487.7	1.174	4.76	1.01	3.207	72448.678	90.50008215	4.175824176	-2.27	<30	18112.1695	<60	25-30	>=90	<1.3
799	4565	2011-2012	66725	2	95	57	Male	Non-Hispanic White	3.53	More than high school	27.9	103.7	mild	never	yes	116	76	no	0	4.385	19	19	78.68	333.1	0.982	5.84	1.14	4.267	257541.085	94.9118974	2.962962963	0	<30	64385.27125	<60	25-30	>=90	>=1.8
800	4583	2011-2012	66743	2	93	68	Female	Other Race	0.94	Less than high school	26.9	94.3	moderate	former	no	125	73	preDM	0	6.051	15	22	68.95	279.6	1.648	6.13	1.29	4.086	22676.808	78.35966046	8.782608696	-3.07	<30	5669.202	>=60	25-30	60-90	<1.3
801	4599	2011-2012	66759	3	90	57	Female	Non-Hispanic Black	2.23	More than high school	40.2	123.7	heavy	never	yes	143	56	DM	0	8.16	17	18	89.28	386.6	1.264	6.08	2.02	3.491	24431.187	71.40263545	3.868613139	-1.29	<30	6107.79675	<60	>=30	60-90	>=1.8
802	4606	2011-2012	66766	1	101	39	Male	Non-Hispanic White	4.5	Less than high school	18.8	82.4	former	now	no	112	67	no	0	5.162	26	22	97.24	297.4	1.14	4.42	1.22	2.689	247968.78	84.11534713	6.666666667	5.33	<30	61992.195	<60	<25	60-90	>=1.8
803	4610	2011-2012	66770	2	97	22	Female	Non-Hispanic White	2.85	More than high school	44.6	121	heavy	never	yes	106	86	no	0	5.329	23	26	75.14	350.9	1.366	4.01	0.98	2.405	129559.16	97.56678809	7.882352941	5.64	<30	32389.79	<60	>=30	>=90	>=1.8
804	4611	2011-2012	66771	1	98	31	Female	Other Race	0.4	More than high school	34.3	107	moderate	never	no	107	79	no	0	4.996	11	13	69.84	327.1	1.061	5.25	1.19	3.569	99021.771	100.0648555	26.4	3.78	<30	24755.44275	<60	>=30	>=90	<1.3
805	4617	2011-2012	66777	2	93	39	Male	Other Race	0.43	Less than high school	42.4	139.2	former	now	yes	145	88	DM	0	9.548	32	19	82.21	273.6	4.222	5.09	0.75	2.405	80229.369	103.0440959	12.2875817	-2.88	<30	20057.34225	<60	>=30	>=90	<1.3
806	4621	2011-2012	66781	1	90	68	Male	Other Race	1.12	More than high school	31.7	105.9	heavy	former	no	130	66	DM	0	8.549	57	37	77.79	374.7	1.535	4.86	1.14	3.026	24391.536	88.26312575	5.3125	-1.65	<30	6097.884	>=60	>=30	60-90	<1.3
807	4629	2011-2012	66789	1	97	38	Female	Non-Hispanic White	1.03	More than high school	30.5	88.8	never	never	no	103	65	no	0	4.885	15	19	54.81	107.1	0.892	5.92	2.02	3.491	66825.63	114.7557153	3.669724771	-1.28	<30	16706.4075	<60	>=30	>=90	<1.3
808	4633	2011-2012	66793	2	101	50	Male	Non-Hispanic Black	2.64	High school or equivalent	30.8	107.1	never	never	yes	97	76	no	1	5.384	15	14	199.78	582.9	2.405	4.99	1.03	2.845	47366.699	37.68878354	10.29850746	-5.8	<30	11841.67475	<60	>=30	<60	>=1.8
809	4635	2011-2012	66795	1	94	23	Male	Non-Hispanic White	0.37	Less than high school	20.8	71	heavy	now	no	132	69	no	0	4.163	24	24	76.02	279.6	1.14	3.88	1.58	1.784	92382.281	122.2268547	10.14285714	-0.38	<30	23095.57025	<60	<25	>=90	<1.3
810	4636	2011-2012	66796	1	95	70	Male	Non-Hispanic White	4.08	High school or equivalent	28.1	104.7	mild	former	yes	118	66	DM	0	6.495	22	22	83.98	321.2	2.393	4.22	1.01	2.121	158701.123	80.7751666	10.96774194	1.37	<30	39675.28075	>=60	25-30	60-90	>=1.8
811	4638	2011-2012	66798	2	92	56	Female	Other Race	0.4	More than high school	30.5	96.2	former	former	yes	172	69	no	0	5.273	14	13	59.23	303.3	1.05	4.91	1.6	2.819	81773.099	98.57778441	6.736842105	-3.82	<30	20443.27475	<60	>=30	>=90	<1.3
812	4657	2011-2012	66817	1	94	72	Female	Non-Hispanic White	0.83	High school or equivalent	38.7	126.2	mild	former	yes	128	47	preDM	0	5.44	29	26	61	386.6	1.513	6.52	1.34	4.474	52319.383	87.24976946	6.274509804	-3.29	<30	13079.84575	>=60	>=30	60-90	<1.3
813	4659	2011-2012	66819	1	101	20	Male	Non-Hispanic White	0.97	Less than high school	21.7	78.6	heavy	now	no	118	62	no	0	5.495	28	23	74.26	463.9	1.434	3.75	1.03	2.069	250283.431	126.0430685	3.956043956	0.69	<30	62570.85775	<60	<25	>=90	<1.3
814	4678	2011-2012	66838	1	101	65	Female	Non-Hispanic White	3.13	More than high school	33.5	118	mild	never	yes	117	74	preDM	0	6.328	22	25	68.95	273.6	2.585	6.96	1.37	4.396	310738.108	80.0285227	19.8	3.4	<30	77684.527	>=60	>=30	60-90	>=1.8
815	4679	2011-2012	66839	1	93	25	Female	Other Race	0.41	More than high school	17	71.7	moderate	never	no	110	52	no	0	4.94	14	20	46.85	214.1	1.005	4.01	1.34	2.198	28145.168	132.3866518	5.714285714	-1.97	<30	7036.292	<60	<25	>=90	<1.3
816	4688	2011-2012	66848	1	90	52	Female	Non-Hispanic White	5	More than high school	21.6	80.1	mild	never	no	97	64	no	0	5.162	17	26	53.04	249.8	0.531	4.97	2.02	2.715	340383.271	105.1353846	6.75	6.91	<30	85095.81775	<60	<25	>=90	>=1.8
817	4691	2011-2012	66851	1	97	46	Female	Non-Hispanic White	5	More than high school	28.7	107.2	moderate	former	no	124	79	no	0	5.718	16	16	73.37	315.2	0.903	6.1	1.66	4.034	338837.577	84.83714396	7.094972067	-0.5	<30	84709.39425	<60	25-30	60-90	>=1.8
818	4701	2011-2012	66861	2	95	21	Male	Non-Hispanic Black	1.36	More than high school	37.5	117.6	never	never	no	135	73	no	0	5.162	38	22	77.79	398.5	0.847	4.16	1.22	2.56	55475.052	141.9492545	6.385869565	-2.73	<30	13868.763	<60	>=30	>=90	1.3-1.8
819	4709	2011-2012	66869	1	97	54	Female	Non-Hispanic Black	5	More than high school	36.4	115.9	never	never	yes	120	72	no	0	5.107	18	25	69.84	285.5	1.152	5.43	1.63	3.284	52686.205	98.14312533	10.90909091	-5	<30	13171.55125	<60	>=30	>=90	>=1.8
820	4714	2011-2012	66874	2	100	31	Female	Non-Hispanic White	5	More than high school	27.2	93.4	heavy	never	no	95	52	no	0	5.051	12	18	52.16	184.4	0.666	5.51	1.76	3.439	114074.095	122.5225815	20	-0.34	<30	28518.52375	<60	25-30	>=90	>=1.8
821	4716	2011-2012	66876	2	91	62	Female	Non-Hispanic White	5	More than high school	26.5	97	mild	never	yes	111	70	no	0	4.996	20	28	74.26	404.5	0.7	6.85	2.51	4.034	339368.291	74.72841525	7.959183673	-0.93	<30	84842.07275	>=60	25-30	60-90	>=1.8
822	4725	2011-2012	66885	2	95	76	Male	Non-Hispanic Black	0.87	Less than high school	24.8	90.7	former	former	yes	107	58	DM	0	9.992	28	26	92.82	434.2	2.823	4.16	1.11	1.758	18599.608	79.32166495	11.11111111	1.75	<30	4649.902	>=60	<25	60-90	<1.3
823	4733	2011-2012	66893	1	95	60	Male	Non-Hispanic White	4.01	High school or equivalent	54.1	152.4	heavy	never	yes	142	73	DM	0	12.823	23	23	73.37	398.5	1.75	4.71	1.03	2.87	344674.014	95.63714388	9.465020576	0.41	<30	86168.5035	>=60	>=30	>=90	>=1.8
824	4736	2011-2012	66896	2	101	64	Male	Non-Hispanic Black	0.78	Less than high school	27.5	95.1	heavy	never	yes	143	75	no	0	5.662	10	15	79.56	493.7	0.79	4.94	1.6	2.974	24079.462	103.9775328	3.911111111	-2	<30	6019.8655	>=60	25-30	>=90	<1.3
825	4738	2011-2012	66898	2	99	45	Female	Non-Hispanic Black	2.6	More than high school	20.2	78.7	never	never	no	98	64	no	0	4.052	17	22	76.91	237.9	0.44	5.33	2.07	3.051	65884.391	93.03985487	3.023255814	8.62	<30	16471.09775	<60	<25	>=90	>=1.8
826	4743	2011-2012	66903	2	94	39	Female	Non-Hispanic White	1.17	More than high school	19.3	74.4	never	never	no	NA	NA	no	0	4.33	53	30	95.47	291.5	0.96	4.76	1.34	2.974	162484.221	64.81826371	8.604651163	-1.8	<30	40621.05525	<60	<25	60-90	<1.3
827	4745	2011-2012	66905	2	96	25	Female	Other Race	2.2	More than high school	18.7	68.8	mild	never	no	115	73	no	0	4.607	15	19	61.88	321.2	0.655	4.34	1.86	2.172	47655.91	120.8074464	10.625	-3.79	<30	11913.9775	<60	<25	>=90	>=1.8
828	4758	2011-2012	66918	2	103	72	Male	Non-Hispanic White	3.44	Less than high school	34.6	126.7	mild	former	yes	112	57	DM	0	11.102	79	62	84.86	416.4	1.648	4.94	1.29	2.896	76767.87	78.64629672	10.31578947	-1.97	<30	19191.9675	>=60	>=30	60-90	>=1.8
829	4765	2011-2012	66925	1	99	23	Female	Non-Hispanic White	0.46	More than high school	22	85.6	moderate	never	no	100	77	preDM	0	4.94	8	25	68.07	297.4	1.276	5.43	2.25	2.586	118621.153	109.182102	7.926829268	2.21	<30	29655.28825	<60	<25	>=90	<1.3
830	4767	2011-2012	66927	2	101	20	Male	Other Race	0.11	More than high school	32.6	105.3	heavy	now	yes	131	38	no	0	4.996	31	24	95.47	392.6	0.7	4.68	1.01	3.362	109018.098	98.28199332	3.873239437	0.92	<30	27254.5245	<60	>=30	>=90	<1.3
831	4769	2011-2012	66929	2	95	63	Female	Non-Hispanic Black	5	More than high school	27.3	99.3	never	never	yes	128	70	preDM	0	6.328	19	23	82.21	249.8	1.005	4.47	1.09	2.922	48161.892	75.63771298	8.932038835	-2.35	<30	12040.473	>=60	25-30	60-90	>=1.8
832	4778	2011-2012	66938	1	97	62	Female	Other Race	2.29	Less than high school	27.2	84.6	never	never	no	118	57	no	0	4.441	19	20	65.42	380.7	1.558	5.09	1.47	2.896	47804.157	87.10403627	3.493975904	-3.57	<30	11951.03925	>=60	25-30	60-90	>=1.8
833	4782	2011-2012	66942	2	95	43	Female	Non-Hispanic White	0.9	Less than high school	47.8	143.7	former	former	yes	133	69	DM	0	7.327	28	27	78.68	648.3	1.456	4.76	1.11	2.974	45847.415	79.63265392	11.75	-1.9	<30	11461.85375	<60	>=30	60-90	<1.3
834	4783	2011-2012	66943	1	101	46	Female	Non-Hispanic White	0.67	Less than high school	31.8	101.5	never	now	no	102	60	no	0	5.44	23	22	91.94	315.2	3.014	5.02	0.93	2.715	64972.735	64.58893834	10.08928571	-3.26	<30	16243.18375	<60	>=30	60-90	<1.3
835	4794	2011-2012	66954	2	92	27	Female	Non-Hispanic White	5	More than high school	24.5	88.9	moderate	never	no	92	67	no	0	4.94	12	19	68.07	208.2	1.694	5.35	1.5	3.077	181839.845	106.1569531	14.67741935	-2.08	<30	45459.96125	<60	<25	>=90	>=1.8
836	4796	2011-2012	66956	2	98	21	Female	Non-Hispanic White	0.54	Less than high school	25.9	91	never	now	no	100	62	no	0	5.718	21	16	51.27	255.8	1.931	4.29	0.91	2.508	86071.359	132.1801243	21.93181818	-0.44	<30	21517.83975	<60	25-30	>=90	<1.3
837	4797	2011-2012	66957	1	98	62	Male	Non-Hispanic White	1.75	More than high school	33.7	114.2	mild	former	yes	141	81	preDM	0	6.217	44	33	95.47	410.4	1.535	4.01	1.29	2.017	296372.364	73.17157326	5.555555556	-0.2	<30	74093.091	>=60	>=30	60-90	1.3-1.8
838	4799	2011-2012	66959	2	102	43	Female	Mexican American	0.54	Less than high school	29.7	95	heavy	never	no	119	71	no	0	4.885	42	38	42.43	362.8	0.723	4.58	1.68	2.56	73592.649	120.5283095	25.98425197	-1.38	<30	18398.16225	<60	25-30	>=90	<1.3
839	4801	2011-2012	66961	1	101	36	Male	Other Race	3.67	More than high school	25.3	94.5	mild	never	no	114	69	no	0	5.551	26	30	92.82	422.3	2.969	5.95	1.14	3.439	49542.41	90.87687612	9.369369369	0.75	<30	12385.6025	<60	25-30	>=90	>=1.8
840	4821	2011-2012	66981	1	101	42	Male	Non-Hispanic White	0.84	More than high school	42.3	128.3	moderate	now	no	106	68	preDM	0	6.162	37	24	90.17	333.1	1.806	4.97	1.01	3.129	57407.944	90.23377685	3.580246914	-1.43	<30	14351.986	<60	>=30	>=90	<1.3
841	4824	2011-2012	66984	2	93	75	Male	Non-Hispanic White	3.61	More than high school	43.7	140.6	never	former	yes	141	74	DM	0	6.384	29	26	90.17	398.5	2.055	4.78	0.91	2.948	124727.642	71.56395535	13.39534884	-1.1	<30	31181.9105	>=60	>=30	60-90	>=1.8
842	4828	2011-2012	66988	1	96	40	Female	Non-Hispanic Black	0.93	More than high school	33.9	102.2	mild	never	no	102	70	no	0	4.274	18	28	58.34	273.6	0.689	4.73	1.42	3	45091.136	127.7866039	5.255474453	4.18	<30	11272.784	<60	>=30	>=90	<1.3
843	4841	2011-2012	67001	1	91	76	Male	Non-Hispanic White	3.4	Less than high school	26.8	98.7	never	former	yes	116	63	no	0	6.106	26	25	81.33	446.1	1.027	6.34	1.58	4.293	155654.796	80.50478768	9.032258065	-1.39	<30	38913.699	>=60	25-30	60-90	>=1.8
844	4843	2011-2012	67003	2	92	68	Male	Non-Hispanic White	5	More than high school	28	101.9	moderate	former	no	139	66	no	0	5.718	19	24	88.4	327.1	0.485	5.82	2.02	3.569	251738.539	76.99228417	6.851851852	1.77	<30	62934.63475	>=60	25-30	60-90	>=1.8
845	4851	2011-2012	67011	2	100	67	Female	Non-Hispanic Black	0.72	Less than high school	22.9	76	former	never	yes	127	64	preDM	0	5.107	18	21	75.14	255.8	0.937	5.51	1.94	3.129	34791.152	81.99054749	20	-0.54	<30	8697.788	>=60	<25	60-90	<1.3
846	4855	2011-2012	67015	3	90	22	Female	Non-Hispanic Black	2.23	More than high school	26.4	95.5	heavy	never	no	111	66	no	0	5.051	19	23	67.18	362.8	2.574	4.97	1.24	2.534	33881.963	128.7690383	8.709677419	-1.96	<30	8470.49075	<60	25-30	>=90	>=1.8
847	4860	2011-2012	67020	2	98	78	Male	Non-Hispanic White	5	More than high school	35	127.5	mild	former	yes	143	78	preDM	1	6.661	19	22	121.11	303.3	2.202	5.22	1.14	3.077	171995.14	49.05062252	145.045045	1.22	>=30	42998.785	>=60	>=30	<60	>=1.8
848	4872	2011-2012	67032	2	92	32	Female	Other Race	1.35	More than high school	21.1	74.6	former	never	no	93	65	no	0	4.774	13	18	68.07	196.3	0.44	3.85	1.58	2.069	47315.112	102.4931138	27.09219858	2.96	<30	11828.778	<60	<25	>=90	1.3-1.8
849	4877	2011-2012	67037	2	91	66	Female	Other Race	0.67	Less than high school	37.1	119.7	mild	never	yes	159	68	DM	0	5.773	18	24	61	333.1	1.513	5.95	1.11	4.138	46057.668	91.00574245	10.37037037	-5.08	<30	11514.417	>=60	>=30	>=90	<1.3
850	4879	2011-2012	67039	3	90	31	Female	Non-Hispanic White	3.64	More than high school	19.6	72.3	former	former	no	87	58	no	0	4.552	18	23	53.04	190.3	0.565	4.53	1.53	2.741	175968.978	121.8469575	6.326530612	0.4	<30	43992.2445	<60	<25	>=90	>=1.8
851	4881	2011-2012	67041	2	101	36	Female	Non-Hispanic Black	0.54	High school or equivalent	22.9	83.7	moderate	now	no	118	82	no	0	5.162	12	18	62.76	232	0.881	4.27	1.32	2.534	124320.418	126.7165151	3.630952381	-2.28	<30	31080.1045	<60	<25	>=90	<1.3
852	4895	2011-2012	67055	1	94	71	Female	Non-Hispanic White	1.24	Less than high school	24.3	93.1	heavy	now	yes	153	64	no	0	5.162	25	23	57.46	356.9	3.613	5.3	1.94	1.707	57489.605	89.60822941	4.814814815	4.57	<30	14372.40125	>=60	<25	60-90	<1.3
853	4898	2011-2012	67058	1	96	42	Male	Non-Hispanic Black	5	More than high school	21.8	82	moderate	now	no	123	79	no	0	5.44	49	34	98.12	333.1	1.998	5.61	0.88	3.827	60930.706	94.17589447	3.965517241	-2.35	<30	15232.6765	<60	<25	>=90	>=1.8
854	4906	2011-2012	67066	1	94	65	Male	Non-Hispanic White	1.24	More than high school	26.6	100.5	heavy	now	no	133	48	no	0	4.829	17	24	66.3	368.8	1.614	5.3	1.5	3.051	50733.346	96.26396748	3.835616438	-1.17	<30	12683.3365	>=60	25-30	>=90	<1.3
855	4907	2011-2012	67067	2	93	23	Male	Other Race	0.43	High school or equivalent	30.8	99	heavy	now	no	120	70	preDM	0	5.107	48	29	78.68	386.6	1.705	4.19	0.67	2.741	89863.582	120.5164157	2.962962963	2.17	<30	22465.8955	<60	>=30	>=90	<1.3
856	4923	2011-2012	67083	3	91	26	Male	Non-Hispanic White	5	Less than high school	31.7	101	heavy	now	no	128	55	no	0	5.329	114	70	83.98	374.7	0.734	4.4	1.91	2.146	250771.653	110.0299533	16.91331924	-4.14	<30	62692.91325	<60	>=30	>=90	>=1.8
857	4938	2011-2012	67098	2	100	62	Female	Non-Hispanic Black	0.43	High school or equivalent	21.7	79.3	never	never	yes	147	59	no	0	5.495	12	22	77.79	178.4	0.61	3.65	1.71	1.655	42981.349	81.43394503	21.75182482	-3.35	<30	10745.33725	>=60	<25	60-90	<1.3
858	4946	2011-2012	67106	2	90	21	Male	Other Race	0.25	High school or equivalent	25.2	88.1	heavy	never	no	NA	NA	no	0	5.662	20	25	63.65	321.2	0.61	4.09	0.93	2.87	74435.901	133.3470298	2.285714286	11.4	<30	18608.97525	<60	25-30	>=90	<1.3
859	4952	2011-2012	67112	2	96	64	Female	Mexican American	5	More than high school	25.2	84	mild	former	yes	NA	NA	no	0	5.218	25	24	62.76	327.1	0.768	4.65	1.63	2.664	27184.32	90.29559884	4.444444444	5.44	<30	6796.08	>=60	25-30	>=90	>=1.8
860	4953	2011-2012	67113	1	93	55	Female	Non-Hispanic White	5	More than high school	20	77	mild	never	no	NA	NA	no	0	5.218	15	26	55.69	214.1	1.129	5.35	1.45	3.388	432345.787	101.3037154	8.928571429	7.63	<30	108086.4468	<60	<25	>=90	>=1.8
861	4955	2011-2012	67115	2	93	59	Male	Other Race	2.6	More than high school	33.1	113	mild	former	no	130	76	preDM	0	6.273	18	19	93.7	386.6	1.118	5.09	1.29	3.284	62878.778	76.43797562	5.377358491	3.33	<30	15719.6945	<60	>=30	60-90	>=1.8
862	4956	2011-2012	67116	2	99	31	Female	Mexican American	5	More than high school	29.3	97.1	moderate	former	no	105	76	no	0	5.384	14	17	58.34	202.2	1.027	4.24	1.66	2.121	119462.117	118.0854791	6.341463415	3.8	<30	29865.52925	<60	25-30	>=90	>=1.8
863	4961	2011-2012	67121	1	91	39	Male	Other Race	0.89	More than high school	28.5	98.5	moderate	former	no	112	79	no	0	5.829	25	22	86.63	541.3	2.642	4.68	1.01	2.457	42060.757	96.72231272	3.289473684	-1.46	<30	10515.18925	<60	25-30	>=90	<1.3
864	4974	2011-2012	67134	2	99	29	Male	Other Race	4.92	More than high school	24	87.5	mild	now	no	116	66	no	0	4.718	30	34	91.05	356.9	1.558	5.43	1.47	3.233	76810.844	97.70264212	5.084745763	2.26	<30	19202.711	<60	<25	>=90	>=1.8
865	4983	2011-2012	67143	2	94	33	Male	Other Race	3.06	High school or equivalent	22	81.9	never	never	no	109	61	no	0	4.663	28	30	74.26	339	0.598	4.81	1.6	2.922	65051.309	115.042735	5.476190476	-2.23	<30	16262.82725	<60	<25	>=90	>=1.8
866	5005	2011-2012	67165	1	101	46	Female	Non-Hispanic White	0.66	More than high school	27.3	99.6	heavy	now	yes	146	83	no	0	5.384	18	20	53.92	505.6	2.89	4.84	1.09	2.431	74160.679	109.0665717	2.5	3.75	<30	18540.16975	<60	25-30	>=90	<1.3
867	5022	2011-2012	67182	1	98	44	Female	Non-Hispanic Black	3.77	More than high school	32.3	108	never	never	no	105	70	no	0	5.495	116	206	76.91	321.2	1.016	4.68	1.34	2.87	44506.965	93.69572495	4.342105263	6.18	<30	11126.74125	<60	>=30	>=90	>=1.8
868	5024	2011-2012	67184	2	94	42	Male	Mexican American	5	More than high school	32.5	106.6	heavy	former	yes	140	81	no	0	5.662	45	27	63.65	327.1	1.095	4.91	1.71	2.715	64645.557	115.0581972	3.206521739	-0.09	<30	16161.38925	<60	>=30	>=90	>=1.8
869	5029	2011-2012	67189	2	103	70	Female	Other Race	1.43	High school or equivalent	27.1	91	moderate	never	yes	167	78	DM	0	5.162	21	22	63.65	249.8	2.235	7.14	1.81	4.293	31749.114	85.11741564	17.40740741	-1.47	<30	7937.2785	>=60	25-30	60-90	1.3-1.8
870	5030	2011-2012	67190	1	101	36	Female	Non-Hispanic White	4.5	More than high school	27.3	104.8	former	now	yes	129	66	no	0	5.273	12	15	51.27	232	0.858	3.85	1.24	2.224	171262.504	118.9610759	10.50632911	-0.59	<30	42815.626	<60	25-30	>=90	>=1.8
871	5031	2011-2012	67191	1	101	33	Female	Non-Hispanic White	1.65	Less than high school	28.2	91.3	mild	former	no	109	68	no	0	5.218	40	24	61	237.9	1.524	6.59	1.24	4.655	63932.76	114.7475963	4.035087719	2.96	<30	15983.19	<60	25-30	>=90	1.3-1.8
872	5032	2011-2012	67192	2	98	55	Female	Non-Hispanic White	2.7	More than high school	28.1	94.9	heavy	now	yes	NA	NA	no	0	4.607	38	45	66.3	374.7	1.264	5.66	2.43	2.664	301181.574	90.02137088	3.846153846	-2.84	<30	75295.3935	<60	25-30	>=90	>=1.8
873	5033	2011-2012	67193	1	99	37	Male	Non-Hispanic Black	1.76	More than high school	26.2	89.2	former	never	no	126	71	no	0	5.662	23	28	104.31	261.7	2.089	6.36	1.68	3.724	66614.404	90.59070632	4.056603774	-2.04	<30	16653.601	<60	25-30	>=90	1.3-1.8
874	5034	2011-2012	67194	1	91	51	Male	Non-Hispanic Black	2.56	More than high school	26.4	99.6	moderate	former	yes	114	70	DM	0	5.94	37	26	73.37	380.7	0.655	2.97	1.09	1.577	46764.498	117.7746584	4.334975369	-1.1	<30	11691.1245	<60	25-30	>=90	>=1.8
875	5035	2011-2012	67195	1	94	49	Male	Non-Hispanic White	3.97	High school or equivalent	29.6	102	mild	never	no	125	78	no	0	5.273	17	22	84.86	309.3	0.723	3.85	1.29	2.224	283408.721	92.43694038	3.355263158	0.46	<30	70852.18025	<60	25-30	>=90	>=1.8
876	5039	2011-2012	67199	2	92	41	Male	Other Race	5	More than high school	24.5	91	mild	now	no	121	80	no	0	4.885	35	31	75.14	285.5	2.348	5.48	1.4	3	32916.48	108.2282893	3.725490196	-0.52	<30	8229.12	<60	<25	>=90	>=1.8
877	5040	2011-2012	67200	1	93	30	Male	Non-Hispanic White	4.41	More than high school	26.7	94.3	moderate	former	no	113	68	no	0	5.829	38	28	75.14	374.7	2.687	5.28	1.03	3	232778.22	116.9227605	4.782608696	1.05	<30	58194.555	<60	25-30	>=90	>=1.8
878	5049	2011-2012	67209	1	102	80	Female	Non-Hispanic White	1.84	More than high school	25.5	97.8	never	never	yes	129	63	DM	1	6.606	23	18	43.32	208.2	1.795	7.34	2.28	4.241	140890.167	92.3134786	46.10169492	-0.09	>=30	35222.54175	>=60	25-30	>=90	>=1.8
879	5054	2011-2012	67214	3	91	39	Male	Non-Hispanic White	5	More than high school	26.3	91.2	heavy	former	no	105	52	preDM	0	6.217	124	58	71.6	440.2	1.84	5.15	1.37	2.922	238044.04	111.9556801	13	7.4	<30	59511.01	<60	25-30	>=90	>=1.8
880	5062	2011-2012	67222	2	102	80	Female	Non-Hispanic White	1.15	Less than high school	35.6	109.1	mild	former	yes	126	71	no	0	5.44	17	18	66.3	267.7	2.518	5.12	1.34	2.612	157863.151	75.52258292	29.30555556	-0.79	<30	39465.78775	>=60	>=30	60-90	<1.3
881	5069	2011-2012	67229	2	91	65	Male	Non-Hispanic White	1.61	High school or equivalent	38.3	133.3	mild	now	no	114	65	DM	0	6.328	23	22	75.14	362.8	1.14	4.94	1.53	2.896	297289.008	91.43716614	2.364864865	1.32	<30	74322.252	>=60	>=30	>=90	1.3-1.8
882	5070	2011-2012	67230	1	97	59	Male	Non-Hispanic Black	5	More than high school	22.8	78.2	moderate	now	no	131	72	preDM	0	5.44	111	115	71.6	333.1	2.1	5.48	1.97	2.56	90626.655	112.4603923	5.909090909	-4.13	<30	22656.66375	<60	<25	>=90	>=1.8
883	5072	2011-2012	67232	1	98	48	Female	Non-Hispanic White	0.18	More than high school	33.4	99	former	never	no	123	85	no	0	5.384	11	29	72.49	315.2	2.19	4.32	1.03	2.276	84630.58	84.88852798	10.34653465	5.95	<30	21157.645	<60	>=30	60-90	<1.3
884	5083	2011-2012	67243	1	96	68	Female	Non-Hispanic Black	0.68	Less than high school	31.1	107.8	heavy	former	yes	142	71	DM	0	7.161	66	165	61.88	315.2	1.084	4.4	1.63	2.276	19441.851	102.9572623	5.12195122	2.58	<30	4860.46275	>=60	>=30	>=90	<1.3
885	5090	2011-2012	67250	2	102	43	Female	Other Race	1.38	More than high school	29.3	93.5	moderate	never	no	124	81	DM	0	5.884	26	30	83.1	291.5	2.055	6.47	1.34	4.189	94139.407	74.54047103	5.454545455	2.02	<30	23534.85175	<60	25-30	60-90	1.3-1.8
886	5098	2011-2012	67258	2	94	73	Female	Non-Hispanic White	2.04	High school or equivalent	43	132.6	mild	never	yes	139	68	preDM	1	6.162	23	28	90.17	333.1	1.535	4.42	1.19	2.534	124394.203	54.69952499	19.82758621	-2.64	<30	31098.55075	>=60	>=30	<60	>=1.8
887	5099	2011-2012	67259	2	100	45	Male	Non-Hispanic White	4.5	More than high school	34.3	111.5	mild	never	yes	121	90	preDM	0	6.328	106	75	93.7	559.1	2.461	5.3	1.03	3.129	191737.827	84.33730087	5.375	-2.04	<30	47934.45675	<60	>=30	60-90	>=1.8
888	5104	2011-2012	67264	1	101	77	Female	Non-Hispanic White	1.61	Less than high school	24.2	99.5	never	never	yes	124	56	no	0	5.329	16	19	57.46	327.1	1.276	5.3	1.37	3.336	194080.671	85.90993433	7.647058824	0.24	<30	48520.16775	>=60	<25	60-90	1.3-1.8
889	5110	2011-2012	67270	3	92	42	Female	Non-Hispanic White	1.41	More than high school	37.9	107	former	now	no	106	81	preDM	0	4.885	18	21	64.53	285.5	0.565	3.57	1.34	1.965	84636.824	101.905382	6.013071895	-4.52	<30	21159.206	<60	>=30	>=90	1.3-1.8
890	5115	2011-2012	67275	2	98	77	Male	Non-Hispanic White	0.88	Less than high school	23.8	95.4	heavy	now	no	111	53	no	1	4.885	18	21	220.12	267.7	1.197	4.89	2.15	2.198	36900.652	23.98752443	19.65217391	-4.09	<30	9225.163	>=60	<25	<60	<1.3
891	5119	2011-2012	67279	2	90	32	Female	Non-Hispanic Black	0.38	More than high school	19.8	76.5	mild	now	no	95	64	no	0	5.495	29	27	67.18	190.3	0.519	3.75	1.42	2.095	63837.506	120.0339056	7.394636015	-0.59	<30	15959.3765	<60	<25	>=90	<1.3
892	5123	2011-2012	67283	1	96	56	Female	Other Race	5	More than high school	27.4	95.9	never	never	no	115	68	preDM	0	5.718	17	18	53.92	309.3	1.253	4.14	1.03	2.534	35156.616	101.6679689	6.796116505	-4.76	<30	8789.154	<60	25-30	>=90	>=1.8
893	5133	2011-2012	67293	2	91	53	Male	Non-Hispanic White	5	More than high school	22.1	83	mild	never	no	109	62	no	0	5.162	22	39	87.52	422.3	0.7	4.4	1.91	2.172	285849.676	86.59354644	5.416666667	-0.67	<30	71462.419	<60	<25	60-90	>=1.8
894	5146	2011-2012	67306	2	97	51	Male	Non-Hispanic Black	0.27	Less than high school	26.8	95.3	former	never	yes	134	85	preDM	0	5.162	18	19	64.53	368.8	0.847	4.58	1.09	3.103	57083.121	124.1558689	7.602739726	-3.16	<30	14270.78025	<60	25-30	>=90	<1.3
895	5148	2011-2012	67308	2	103	21	Male	Other Race	1.07	High school or equivalent	26.7	99.2	heavy	now	no	108	72	no	0	5.551	21	28	85.75	463.9	0.858	4.76	1.22	3.155	21162.787	111.1285117	10.14084507	1.89	<30	5290.69675	<60	25-30	>=90	<1.3
896	5155	2011-2012	67315	2	100	51	Female	Non-Hispanic Black	1.79	High school or equivalent	24.9	89.8	former	now	no	127	69	no	0	5.162	12	17	67.18	208.2	1.784	5.69	1.01	3.853	44744.525	105.0363589	4.398340249	-3.33	<30	11186.13125	<60	<25	>=90	1.3-1.8
897	5158	2011-2012	67318	1	96	26	Male	Non-Hispanic Black	1.8	More than high school	25.3	83.7	mild	never	no	125	68	no	0	4.94	16	20	76.91	339	0.96	5.15	1.14	3.569	41633.137	137.6953657	3.386243386	-1.29	<30	10408.28425	<60	25-30	>=90	1.3-1.8
898	5167	2011-2012	67327	2	94	75	Male	Non-Hispanic White	2.04	High school or equivalent	27.4	106.8	moderate	never	yes	124	61	preDM	0	6.162	29	23	97.24	404.5	1.468	4.16	1.47	2.017	120224.351	65.32030251	27.0754717	-2.83	<30	30056.08775	>=60	25-30	60-90	>=1.8
899	5172	2011-2012	67332	1	103	45	Female	Other Race	1.89	More than high school	28.8	93.3	never	never	no	NA	NA	DM	0	6.606	56	35	60.11	374.7	1.411	7.29	1.11	5.534	39913.89	105.9791659	15.35714286	0.34	<30	9978.4725	<60	25-30	>=90	>=1.8
900	5178	2011-2012	67338	2	96	24	Male	Non-Hispanic Black	0.57	High school or equivalent	31.7	94.2	heavy	now	yes	117	59	no	0	5.495	22	21	114.04	380.7	1.298	5.53	0.98	3.957	47914.532	89.11397219	1.433447099	0.8	<30	11978.633	<60	>=30	60-90	<1.3
901	5179	2011-2012	67339	2	102	70	Male	Non-Hispanic White	4.08	More than high school	25.9	110.7	mild	never	yes	121	66	DM	0	6.994	23	23	106.08	214.1	1.016	4.42	1.06	2.896	217521.548	60.89975911	5.151515152	0.12	<30	54380.387	>=60	25-30	60-90	>=1.8
902	5181	2011-2012	67341	1	98	74	Male	Mexican American	3.3	Less than high school	25.3	102.5	mild	never	no	122	65	preDM	0	5.329	19	31	83.98	261.7	1.231	3.21	1.14	1.5	26744.101	78.53709921	7.163120567	-1.21	<30	6686.02525	>=60	25-30	60-90	>=1.8
903	5183	2011-2012	67343	1	95	58	Male	Non-Hispanic Black	1.74	More than high school	22.7	85.8	moderate	now	no	125	73	no	0	5.051	14	19	88.4	339	1.084	4.37	1.24	2.638	100060.386	95.48237458	3.675213675	6.1	<30	25015.0965	<60	<25	>=90	1.3-1.8
904	5195	2011-2012	67355	1	103	22	Female	Mexican American	0.51	More than high school	27.4	98.4	heavy	never	no	117	59	no	0	4.885	25	24	40.66	226	0.903	3.13	1.11	1.603	75352.823	141.6562979	6.929133858	-2.01	<30	18838.20575	<60	25-30	>=90	<1.3
905	5215	2011-2012	67375	2	100	45	Female	Non-Hispanic Black	1.38	Less than high school	37.3	109.6	former	never	yes	113	57	preDM	0	6.162	18	18	57.46	321.2	0.565	3.72	1.37	2.095	39398.456	123.9975291	3.387096774	-2.54	<30	9849.614	<60	>=30	>=90	1.3-1.8
906	5220	2011-2012	67380	2	99	58	Female	Non-Hispanic Black	1.88	More than high school	47.1	126	former	former	yes	124	74	no	0	6.051	27	25	69.84	267.7	0.858	6.57	1.89	4.293	35939.778	95.42383748	3.695652174	15.32	<30	8984.9445	<60	>=30	>=90	>=1.8
907	5225	2011-2012	67385	2	90	47	Male	Other Race	1.16	High school or equivalent	23.6	82.8	moderate	now	no	114	60	no	0	5.273	47	34	81.33	321.2	0.745	5.2	1.55	3.31	61785.832	98.69462531	3.25	-1.94	<30	15446.458	<60	<25	>=90	<1.3
908	5232	2011-2012	67392	2	93	41	Male	Other Race	1.49	More than high school	31.2	104	heavy	never	no	124	82	preDM	0	5.551	25	26	92.82	410.4	1.276	4.78	1.42	2.767	71327.521	87.74040451	1.959459459	-0.09	<30	17831.88025	<60	>=30	60-90	1.3-1.8
909	5235	2011-2012	67395	2	95	55	Female	Non-Hispanic Black	0.66	Less than high school	29.9	99.4	former	never	no	121	75	DM	0	2.998	19	25	69.84	321.2	0.937	6	1.5	4.06	39607.132	97.45612345	4.191176471	2.76	<30	9901.783	<60	25-30	>=90	<1.3
910	5247	2011-2012	67407	1	97	64	Male	Non-Hispanic White	5	High school or equivalent	23.3	92	former	former	no	123	68	no	0	4.829	18	24	84.86	321.2	0.96	4.63	1.45	2.741	332158.29	83.19252186	7.281553398	3.91	<30	83039.5725	>=60	<25	60-90	>=1.8
911	5254	2011-2012	67414	1	99	77	Female	Non-Hispanic Black	1.07	Less than high school	36.5	119.5	former	former	yes	126	70	DM	0	5.718	14	22	83.98	321.2	0.734	4.94	1.78	2.819	30401.652	66.81222173	3.916666667	-0.64	<30	7600.413	>=60	>=30	60-90	<1.3
912	5257	2011-2012	67417	2	97	58	Female	Other Race	5	More than high school	20.5	75.5	never	never	no	91	66	no	0	5.495	18	19	68.07	321.2	1.682	4.94	1.53	2.638	52297.467	85.38373499	3.770491803	2.2	<30	13074.36675	<60	<25	60-90	>=1.8
913	5260	2011-2012	67420	2	91	22	Male	Other Race	4.71	High school or equivalent	20.9	74.6	mild	now	no	104	52	no	0	4.996	19	20	83.1	327.1	1.027	4.34	1.68	2.198	98366.119	114.622585	3.04526749	1.11	<30	24591.52975	<60	<25	>=90	>=1.8
914	5264	2011-2012	67424	2	101	32	Female	Non-Hispanic Black	0.65	High school or equivalent	54.4	148	heavy	never	yes	129	66	no	0	5.607	14	16	98.12	404.5	0.756	3	1.32	1.345	106233.751	75.9297708	2.938388626	-1.82	<30	26558.43775	<60	>=30	60-90	<1.3
915	5273	2011-2012	67433	2	98	65	Male	Mexican American	0.48	More than high school	47	150.7	heavy	former	yes	153	93	preDM	1	5.718	13	16	55.69	273.6	1.197	5.69	1.29	3.853	28202.6	103.4153415	40.15151515	0.53	>=30	7050.65	>=60	>=30	>=90	<1.3
916	5276	2011-2012	67436	2	92	23	Female	Non-Hispanic Black	1.38	More than high school	20.3	77.8	moderate	never	no	117	82	no	1	4.441	14	19	56.58	255.8	0.723	5.2	1.84	3.026	54370.033	145.4604233	171.2418301	5.05	>=30	13592.50825	<60	<25	>=90	1.3-1.8
917	5278	2011-2012	67438	2	92	61	Male	Non-Hispanic Black	1.32	Less than high school	30.5	110.8	heavy	never	yes	130	64	no	1	5.995	24	26	64.53	422.3	1.648	4.65	1.37	2.534	18233.284	115.7336736	138.7900356	0.55	>=30	4558.321	>=60	>=30	>=90	1.3-1.8
918	5282	2011-2012	67442	1	99	39	Female	Non-Hispanic Black	2.72	More than high school	28.8	91.7	mild	never	yes	123	65	no	0	4.385	11	18	68.95	202.2	0.429	4.89	1.86	2.819	71437.161	110.741381	3.223140496	1.92	<30	17859.29025	<60	25-30	>=90	>=1.8
919	5285	2011-2012	67445	2	100	38	Female	Mexican American	0.81	Less than high school	24.7	79.6	never	never	no	103	60	no	0	4.94	15	21	56.58	243.9	1.547	4.99	1.58	2.715	75064.216	113.5632934	5.294117647	10.55	<30	18766.054	<60	<25	>=90	<1.3
920	5294	2011-2012	67454	2	92	76	Female	Non-Hispanic White	2.02	High school or equivalent	24.2	90.7	mild	never	yes	144	57	DM	0	5.884	29	27	67.18	249.8	1.897	5.9	2.02	3	111066.076	76.44080906	8.348623853	-0.96	<30	27766.519	>=60	<25	60-90	>=1.8
921	5295	2011-2012	67455	1	101	70	Male	Non-Hispanic White	1.65	High school or equivalent	27.6	100.2	former	now	no	121	74	no	0	5.94	16	19	92.82	368.8	2.043	5.51	1.01	3.569	193581.004	71.56947619	16.03773585	-1.07	<30	48395.251	>=60	25-30	60-90	1.3-1.8
922	5302	2011-2012	67462	2	96	38	Female	Mexican American	0.95	High school or equivalent	38	127.4	heavy	now	no	103	66	DM	0	10.713	38	43	46.85	303.3	3.726	4.86	1.03	2.121	118767.951	120.8326858	18.38709677	0.28	<30	29691.98775	<60	>=30	>=90	<1.3
923	5303	2011-2012	67463	1	95	28	Male	Non-Hispanic White	5	More than high school	32.5	113.8	heavy	never	no	135	73	no	0	5.662	105	49	87.52	422.3	1.569	3.65	0.85	2.069	283670.432	103.2177325	3.800738007	0.69	<30	70917.608	<60	>=30	>=90	>=1.8
924	5315	2011-2012	67475	2	100	52	Male	Non-Hispanic Black	5	High school or equivalent	37.1	126.2	moderate	now	yes	123	74	no	0	4.718	40	29	106.96	386.6	0.937	4.29	1.16	2.689	45759.478	79.09339314	2.051282051	-3.46	<30	11439.8695	<60	>=30	60-90	>=1.8
925	5320	2011-2012	67480	2	95	62	Female	Non-Hispanic Black	3.85	More than high school	33.1	97	former	never	yes	131	70	no	0	5.829	11	17	61.88	291.5	0.858	5.64	1.97	3.284	24517.019	107.3894195	6.825396825	4.38	<30	6129.25475	>=60	>=30	>=90	>=1.8
926	5323	2011-2012	67483	1	92	64	Female	Other Race	0.66	Less than high school	25.9	91.6	former	never	yes	130	80	preDM	0	6.217	14	15	53.04	172.5	1.355	5.46	1.45	3.388	25910.331	96.63621015	16.09756098	-0.67	<30	6477.58275	>=60	25-30	>=90	<1.3
927	5328	2011-2012	67488	2	96	29	Male	Other Race	3.21	More than high school	22.8	81.8	mild	never	no	113	73	no	0	5.051	20	26	87.52	297.4	1.039	4.94	1.6	2.87	27731.301	102.4952084	3.970037453	0.32	<30	6932.82525	<60	<25	>=90	>=1.8
928	5333	2011-2012	67493	2	100	76	Male	Non-Hispanic Black	4.35	High school or equivalent	22.9	92.9	mild	former	yes	120	69	no	0	5.384	16	25	99.89	404.5	0.914	5.04	1.76	2.87	24678.908	72.58348991	4.047619048	-0.13	<30	6169.727	>=60	<25	60-90	>=1.8
929	5334	2011-2012	67494	1	94	34	Male	Non-Hispanic White	0.56	Less than high school	23.3	91.8	mild	former	no	119	67	no	0	5.718	30	24	61.88	321.2	1.4	6.36	1.42	4.293	48964.403	123.1266146	4.391534392	2.81	<30	12241.10075	<60	<25	>=90	<1.3
930	5339	2011-2012	67499	1	99	73	Male	Other Race	5	More than high school	32.1	120.6	mild	never	no	112	68	no	0	5.718	23	32	77.79	345	1.829	4.86	1.37	2.664	24280.396	85.21686359	4.101123596	0.35	<30	6070.099	>=60	>=30	60-90	>=1.8
931	5341	2011-2012	67501	1	95	62	Female	Other Race	4.76	More than high school	31.8	118	former	now	yes	112	60	DM	0	9.825	23	28	60.11	392.6	4.031	3.98	0.72	1.422	319139.323	94.04976651	10.81081081	1.28	<30	79784.83075	>=60	>=30	>=90	>=1.8
932	5343	2011-2012	67503	1	94	45	Female	Non-Hispanic White	3.67	More than high school	37.8	114.5	heavy	now	no	125	77	preDM	0	5.829	23	19	65.42	255.8	0.914	4.84	1.27	3.155	329727.791	98.15242989	6.923076923	-1.21	<30	82431.94775	<60	>=30	>=90	>=1.8
933	5356	2011-2012	67516	2	93	47	Female	Non-Hispanic Black	1.47	More than high school	33.4	109.6	moderate	never	yes	126	81	no	0	5.051	8	16	68.07	303.3	0.745	5.56	1.45	3.776	44793.775	106.3356796	5.688073394	1.45	<30	11198.44375	<60	>=30	>=90	1.3-1.8
934	5360	2011-2012	67520	1	98	79	Male	Non-Hispanic White	1.19	High school or equivalent	48.9	145.8	former	former	yes	125	74	DM	1	7.993	19	23	83.1	434.2	1.773	3.41	0.85	1.758	26032.734	76.8028547	204.1420118	-0.3	>=30	6508.1835	>=60	>=30	60-90	<1.3
935	5367	2011-2012	67527	2	99	29	Female	Non-Hispanic Black	1.27	More than high school	49.4	139.1	never	never	no	110	62	DM	0	6.273	19	17	52.16	333.1	1.208	6.96	0.91	5.508	38422.852	143.2396456	10.27027027	-2.6	<30	9605.713	<60	>=30	>=90	<1.3
936	5370	2011-2012	67530	2	94	52	Male	Mexican American	1.38	More than high school	30.2	99.9	mild	never	yes	134	78	no	0	6.051	22	24	68.07	350.9	1.321	4.99	1.37	3.026	48436.842	104.3340384	3.255813953	-2.43	<30	12109.2105	<60	>=30	>=90	1.3-1.8
937	5372	2011-2012	67532	1	101	71	Female	Non-Hispanic White	1.65	Less than high school	21.4	82.7	moderate	now	yes	122	64	no	1	5.384	17	20	114.04	392.6	1.377	4.01	1.24	2.146	185967.685	41.76184776	21.78082192	-4.79	<30	46491.92125	>=60	<25	<60	1.3-1.8
938	5374	2011-2012	67534	1	102	56	Female	Non-Hispanic White	0.66	More than high school	25.9	95	former	never	no	120	74	no	0	5.107	22	25	62.76	237.9	1.118	5.92	2.07	3.336	73422.627	95.51522314	19.5890411	-3.24	<30	18355.65675	<60	25-30	>=90	<1.3
939	5404	2011-2012	67564	1	92	43	Female	Mexican American	4.99	More than high school	31.3	108.5	moderate	never	yes	131	76	no	0	5.051	15	15	62.76	345	1.411	5.46	1.32	3.491	87109.797	104.6483449	5	4.63	<30	21777.44925	<60	>=30	>=90	>=1.8
940	5417	2011-2012	67577	1	91	60	Female	Non-Hispanic White	4.82	More than high school	30.1	92	moderate	former	yes	123	72	preDM	0	5.718	20	25	52.16	226	1.05	5.2	2.22	2.483	266790.427	99.94115062	6.785714286	1.22	<30	66697.60675	>=60	>=30	>=90	>=1.8
941	5420	2011-2012	67580	1	94	67	Female	Non-Hispanic White	0.95	Less than high school	24.8	99.5	former	former	yes	146	55	DM	0	5.995	28	25	53.04	249.8	2.484	6.39	1.34	3.905	82475.734	94.62102212	8.920863309	0.32	<30	20618.9335	>=60	<25	>=90	<1.3
942	5427	2011-2012	67587	2	94	80	Female	Non-Hispanic White	3.49	More than high school	23.6	82.2	mild	never	no	129	59	DM	0	5.718	16	22	76.02	232	1.31	4.91	2.07	2.25	71399.865	64.00549705	5.411764706	-2	<30	17849.96625	>=60	<25	60-90	>=1.8
943	5431	2011-2012	67591	3	90	40	Male	Other Race	3.47	More than high school	23	89.4	mild	former	no	110	68	no	0	5.107	25	22	78.68	267.7	0.892	3.93	0.91	2.612	26153.992	106.9506507	3.025210084	-1.36	<30	6538.498	<60	<25	>=90	>=1.8
944	5435	2011-2012	67595	2	94	49	Male	Non-Hispanic White	2.11	More than high school	29.6	108.4	mild	never	yes	120	73	preDM	0	5.94	30	27	78.68	368.8	1.603	5.09	1.16	3.207	54277.01	100.3983713	4.370860927	2.45	<30	13569.2525	<60	25-30	>=90	>=1.8
945	5453	2011-2012	67613	1	96	21	Female	Other Race	1.83	More than high school	29	84.6	never	never	no	102	64	no	0	5.051	13	21	53.04	321.2	2.066	4.32	1.03	2.327	29118.788	130.71403	6.451612903	-2.64	<30	7279.697	<60	25-30	>=90	>=1.8
946	5456	2011-2012	67616	1	101	63	Male	Non-Hispanic White	0.81	Less than high school	20.6	87.2	heavy	now	yes	81	54	preDM	0	6.439	9	15	81.33	362.8	1.411	4.97	1.4	2.922	337603.022	88.20261853	4.279661017	-3.01	<30	84400.7555	>=60	<25	60-90	<1.3
947	5475	2011-2012	67635	1	94	65	Male	Mexican American	1.98	Less than high school	26.4	101.2	moderate	never	yes	138	72	DM	0	6.495	37	24	83.1	309.3	0.711	4.27	1.4	2.534	23045.487	84.73988763	3.873239437	-1.29	<30	5761.37175	>=60	25-30	60-90	>=1.8
948	5483	2011-2012	67643	2	95	76	Male	Non-Hispanic White	5	More than high school	30.6	103	mild	former	yes	127	65	preDM	0	6.439	20	29	97.24	279.6	0.632	4.16	1.6	2.276	117312.531	64.86306039	6.50273224	2.75	<30	29328.13275	>=60	>=30	60-90	>=1.8
949	5487	2011-2012	67647	2	95	70	Female	Non-Hispanic Black	1.1	High school or equivalent	29.3	106.1	former	never	yes	135	71	DM	1	6.273	48	42	100.78	553.2	1.152	3.88	1.19	2.172	41365.131	56.29645497	11.27819549	1.82	<30	10341.28275	>=60	25-30	<60	<1.3
950	5492	2011-2012	67652	1	92	46	Male	Non-Hispanic White	1.51	High school or equivalent	26.9	103.7	moderate	now	yes	130	80	DM	1	9.437	21	18	89.28	208.2	2.811	4.45	0.98	2.172	236640.899	88.7849177	681.1188811	3.09	>=30	59160.22475	<60	25-30	60-90	1.3-1.8
951	5501	2011-2012	67661	2	98	80	Male	Non-Hispanic White	1.22	Less than high school	26.5	100.5	never	never	no	117	62	preDM	1	6.162	14	21	114.04	410.4	0.971	3.83	1.24	2.146	28812.276	52.01579331	1.703296703	-2.18	<30	7203.069	>=60	25-30	<60	<1.3
952	5515	2011-2012	67675	1	98	66	Male	Mexican American	1.95	Less than high school	24.3	95.9	moderate	now	no	113	68	no	0	5.495	21	23	68.95	261.7	1.287	6.31	1.73	3.982	20992.91	94.06158725	21.55688623	3.15	<30	5248.2275	>=60	<25	>=90	>=1.8
953	5536	2011-2012	67696	2	102	67	Female	Other Race	1.68	High school or equivalent	23.5	92.7	never	never	no	123	43	DM	0	4.718	47	34	60.11	404.5	1.445	5.46	1.37	3.414	41776.394	90.8037876	4.230769231	-0.68	<30	10444.0985	>=60	<25	>=90	1.3-1.8
954	5538	2011-2012	67698	1	98	63	Female	Non-Hispanic White	3.97	More than high school	20.3	77.9	mild	now	no	101	69	no	0	5.107	11	15	78.68	226	0.881	5.87	2.07	3.388	265354.461	69.19523039	6.774193548	3.13	<30	66338.61525	>=60	<25	60-90	>=1.8
955	5539	2011-2012	67699	2	100	32	Male	Non-Hispanic Black	3.24	High school or equivalent	26.6	91.8	mild	never	yes	143	62	no	0	4.885	47	38	95.47	404.5	3.455	6.05	1.03	3.439	73334.808	104.4319602	3.497942387	1.1	<30	18333.702	<60	25-30	>=90	>=1.8
956	5543	2011-2012	67703	3	92	72	Male	Mexican American	1.98	More than high school	33.7	117.6	mild	former	yes	145	61	DM	0	6.994	19	20	65.42	303.3	0.779	4.45	1.4	2.689	42580.005	92.15193075	13.69230769	1.75	<30	10645.00125	>=60	>=30	>=90	>=1.8
957	5547	2011-2012	67707	2	91	46	Male	Non-Hispanic White	0.44	High school or equivalent	32.2	114.6	moderate	now	yes	114	76	preDM	0	6.162	29	33	102.54	440.2	1.039	5.38	1.34	3.569	72143.469	75.09897826	5.344129555	1.63	<30	18035.86725	<60	>=30	60-90	<1.3
958	5548	2011-2012	67708	1	98	49	Male	Non-Hispanic White	0.97	Less than high school	31.8	114.6	former	now	yes	119	73	preDM	0	6.162	25	22	68.07	458	3.026	5.17	0.85	2.922	45262.8	106.5560891	5.479452055	0.58	<30	11315.7	<60	>=30	>=90	<1.3
959	5558	2011-2012	67718	1	101	49	Female	Non-Hispanic White	1.45	More than high school	38.5	115.3	former	former	yes	123	71	no	0	5.995	18	18	70.72	380.7	1.106	6.23	1.42	4.293	324198.129	86.84871648	10.73684211	-2.7	<30	81049.53225	<60	>=30	60-90	1.3-1.8
960	5567	2011-2012	67727	1	101	32	Female	Non-Hispanic White	1.45	More than high school	27.7	94.3	mild	now	no	112	61	no	0	5.44	22	17	57.46	273.6	1.377	5.2	1.03	3.543	61601.924	117.8493536	5.737704918	-0.03	<30	15400.481	<60	25-30	>=90	1.3-1.8
961	5591	2011-2012	67751	1	98	20	Female	Non-Hispanic White	1.03	High school or equivalent	44.3	129.8	never	never	no	96	74	no	0	4.718	16	17	50.39	196.3	1.423	5.77	1.45	3.672	96262.226	133.8757416	8.139534884	-0.29	<30	24065.5565	<60	>=30	>=90	<1.3
962	5596	2011-2012	67756	2	95	28	Male	Non-Hispanic Black	3.13	More than high school	31.3	98.7	never	never	no	125	76	no	0	5.773	15	20	99.01	255.8	0.44	3.18	1.09	1.888	56995.798	102.7877044	2	-0.7	<30	14248.9495	<60	>=30	>=90	>=1.8
963	5606	2011-2012	67766	1	94	62	Female	Non-Hispanic White	1.26	More than high school	34.3	106.7	mild	never	yes	150	84	DM	0	5.607	20	28	84.86	315.2	0.79	5.02	2.17	2.483	84493.698	63.58775737	6.52173913	0.24	<30	21123.4245	>=60	>=30	60-90	<1.3
964	5612	2011-2012	67772	1	99	73	Female	Non-Hispanic White	3.74	High school or equivalent	27.6	96.1	mild	now	yes	152	83	no	1	5.551	12	19	84.86	374.7	3.76	6.15	0.98	3.439	131726.768	58.8593202	29.1509434	5.84	<30	32931.692	>=60	25-30	<60	>=1.8
965	5618	2011-2012	67778	1	102	31	Male	Non-Hispanic White	0.82	More than high school	27.1	92.5	never	never	yes	144	104	no	0	4.552	25	23	76.02	392.6	1.671	5.46	1.55	3.129	42522.861	115.5475187	9.841269841	6.1	<30	10630.71525	<60	25-30	>=90	<1.3
966	5619	2011-2012	67779	1	97	56	Female	Non-Hispanic White	4.3	More than high school	24.5	79.8	mild	never	no	108	67	no	0	5.662	25	26	67.18	190.3	1.14	6.26	1.53	4.215	472452.362	87.97115726	11.48148148	2.48	<30	118113.0905	<60	<25	60-90	>=1.8
967	5621	2011-2012	67781	2	93	41	Female	Other Race	1.49	More than high school	22.1	83.2	mild	never	no	126	78	no	0	5.44	25	23	57.46	220.1	0.35	3.62	1.37	2.095	68894.874	110.6293705	4.761904762	-3.03	<30	17223.7185	<60	<25	>=90	1.3-1.8
968	5625	2011-2012	67785	1	95	38	Female	Non-Hispanic White	1.21	Less than high school	24.5	85.5	former	now	no	92	58	no	0	5.273	11	16	59.23	333.1	1.185	3.36	0.93	1.888	61576.405	111.8645758	5.076923077	-1.1	<30	15394.10125	<60	<25	>=90	<1.3
969	5626	2011-2012	67786	1	95	45	Male	Non-Hispanic White	1.33	Less than high school	28.6	106.6	mild	former	yes	105	56	no	0	5.495	15	21	75.14	362.8	1.152	4.32	1.58	2.224	325674.953	105.2295681	7.692307692	1.35	<30	81418.73825	<60	25-30	>=90	1.3-1.8
970	5628	2011-2012	67788	2	97	62	Male	Mexican American	1.29	More than high school	25.2	90	mild	never	no	108	70	no	0	5.384	22	22	72.49	321.2	1.208	6.41	1.45	4.422	17935.312	94.77388799	3.931623932	4.64	<30	4483.828	>=60	25-30	>=90	<1.3
971	5633	2011-2012	67793	1	100	39	Male	Mexican American	1.74	High school or equivalent	30.8	93.6	former	never	no	106	73	no	0	5.329	26	27	83.1	374.7	0.508	5.46	1.16	4.06	87293.454	101.7202509	5.094339623	-2.25	<30	21823.3635	<60	>=30	>=90	1.3-1.8
972	5639	2011-2012	67799	1	94	38	Female	Non-Hispanic White	1.26	More than high school	37.8	106	never	former	yes	116	68	DM	0	6.994	39	28	51.27	243.9	1.908	5.72	1.16	3.672	56119.098	117.3014499	9.126213592	-3.29	<30	14029.7745	<60	>=30	>=90	<1.3
973	5658	2011-2012	67818	2	90	21	Female	Non-Hispanic Black	5	More than high school	22.3	73.7	heavy	never	no	89	56	no	0	4.663	21	25	75.14	226	0.745	4.86	1.53	3	42758.052	113.2656849	6.478873239	7.73	<30	10689.513	<60	<25	>=90	>=1.8
974	5659	2011-2012	67819	2	94	79	Female	Other Race	1.16	More than high school	25.6	92.1	never	former	yes	152	87	preDM	1	5.384	16	22	114.04	392.6	1.344	4.11	1.11	2.379	96837.399	39.47968636	23.93939394	11.5	<30	24209.34975	>=60	25-30	<60	<1.3
975	5660	2011-2012	67820	2	95	47	Female	Non-Hispanic Black	1.74	More than high school	29.4	96.5	moderate	never	yes	121	68	no	1	5.051	16	18	76.02	249.8	0.745	3.7	1.22	2.146	49194.536	93.03313805	73.24840764	-1.15	>=30	12298.634	<60	25-30	>=90	1.3-1.8
976	5662	2011-2012	67822	2	95	80	Female	Non-Hispanic White	0.95	Less than high school	24.5	91.2	never	never	yes	133	74	no	1	5.218	12	19	82.21	249.8	1.276	4.01	1.29	2.121	87603.944	58.22775115	14.25837321	-4.78	<30	21900.986	>=60	<25	<60	<1.3
977	5668	2011-2012	67828	2	101	67	Male	Non-Hispanic Black	1.22	Less than high school	24	92.4	former	now	yes	169	81	no	0	5.551	15	25	92.82	392.6	0.542	3.78	1.29	2.224	31648.148	84.49841934	2.875816993	-1.28	<30	7912.037	>=60	<25	60-90	<1.3
978	5673	2011-2012	67833	2	95	80	Male	Non-Hispanic White	1.32	Less than high school	26.3	102.2	former	never	no	101	50	DM	0	5.773	23	30	90.17	327.1	1.095	3.34	1.14	1.707	28155.52	69.09403864	3.965517241	-2.7	<30	7038.88	>=60	25-30	60-90	1.3-1.8
979	5674	2011-2012	67834	3	91	33	Female	Non-Hispanic White	2.75	More than high school	28.2	94	mild	former	no	102	71	no	0	4.996	18	20	76.91	267.7	0.666	4.6	1.5	2.793	203453.543	87.80766863	13.94736842	4.98	<30	50863.38575	<60	25-30	60-90	>=1.8
980	5680	2011-2012	67840	1	92	28	Male	Non-Hispanic White	1.97	More than high school	29.3	97	mild	never	no	116	76	no	0	5.829	31	26	101.66	339	1.174	4.06	0.98	2.534	276148.048	86.11792866	2.638888889	1.45	<30	69037.012	<60	25-30	60-90	>=1.8
981	5681	2011-2012	67841	1	96	58	Male	Other Race	5	More than high school	25	94.9	never	never	no	138	75	no	0	5.051	19	22	85.75	458	2.111	5.84	1.24	3.646	30061.739	85.69346278	8.5	1.44	<30	7515.43475	<60	25-30	60-90	>=1.8
982	5684	2011-2012	67844	3	91	23	Male	Non-Hispanic White	1.5	More than high school	48.7	143.3	former	never	no	118	73	no	1	5.218	21	21	82.21	380.7	1.355	3.59	0.88	2.095	246376.145	115.3015478	64.04494382	5.2	>=30	61594.03625	<60	>=30	>=90	1.3-1.8
983	5695	2011-2012	67855	2	100	58	Male	Other Race	5	More than high school	25.5	88	former	former	yes	143	80	preDM	0	6.273	21	21	78.68	333.1	1.231	5.95	1.37	4.008	30061.739	94.24751412	3.75	-0.76	<30	7515.43475	<60	25-30	>=90	>=1.8
984	5701	2011-2012	67861	2	96	60	Male	Non-Hispanic White	5	More than high school	33.2	116.9	former	former	no	119	80	no	0	5.829	31	26	91.94	404.5	1.705	5.4	1.14	3.491	181371.678	77.67118107	2.914572864	0.81	<30	45342.9195	>=60	>=30	60-90	>=1.8
985	5703	2011-2012	67863	1	91	50	Female	Non-Hispanic White	5	More than high school	21.1	88.2	heavy	former	no	120	84	no	0	5.329	40	39	57.46	273.6	1.581	8.48	2.09	5.663	455468.128	103.8517162	9.855072464	-2.42	<30	113867.032	<60	<25	>=90	>=1.8
986	5710	2011-2012	67870	3	90	20	Female	Other Race	3.23	More than high school	23	72.3	moderate	never	no	NA	NA	no	0	4.996	19	17	48.62	309.3	0.508	4.78	2.22	2.327	26756.604	135.4582287	9.279279279	-1.72	<30	6689.151	<60	<25	>=90	>=1.8
987	5712	2011-2012	67872	1	90	78	Female	Other Race	0.94	Less than high school	28	97.9	never	never	yes	158	80	DM	1	5.995	18	27	53.04	220.1	0.802	5.46	1.4	3.698	64199.414	87.58492623	31.66666667	-1.86	>=30	16049.8535	>=60	25-30	60-90	<1.3
988	5717	2011-2012	67877	2	103	79	Female	Non-Hispanic White	3.44	High school or equivalent	24.5	86.5	mild	never	no	129	71	no	0	4.829	20	25	63.65	333.1	1.434	5.51	1.71	3.155	71176.337	79.90273874	7.37704918	0.98	<30	17794.08425	>=60	<25	60-90	>=1.8
989	5725	2011-2012	67885	1	93	80	Female	Non-Hispanic Black	0.28	High school or equivalent	27.4	95.5	never	never	yes	208	60	DM	1	6.162	13	19	61.88	505.6	1.818	5.77	1.19	3.75	40840.379	94.63416787	326.4444444	-3.08	>=30	10210.09475	>=60	25-30	>=90	<1.3
990	5727	2011-2012	67887	1	92	67	Female	Other Race	5	More than high school	23	80.8	mild	never	yes	134	69	no	1	5.162	34	30	54.81	345	0.644	4.68	1.73	2.664	35380.476	93.60575071	32.8	9.56	>=30	8845.119	>=60	<25	>=90	>=1.8
991	5729	2011-2012	67889	1	101	42	Female	Non-Hispanic White	1.43	More than high school	30.7	98.2	moderate	former	no	95	59	no	0	4.996	14	23	66.3	243.9	0.96	6.57	1.55	4.577	68716.27	98.62917305	5.066666667	-2.41	<30	17179.0675	<60	>=30	>=90	1.3-1.8
992	5731	2011-2012	67891	1	93	29	Female	Other Race	5	More than high school	22.5	73	moderate	never	no	106	67	no	0	5.218	16	20	51.27	160.6	0.677	4.42	1.53	2.586	47881.544	124.9568716	8.571428571	1.1	<30	11970.386	<60	<25	>=90	>=1.8
993	5733	2011-2012	67893	1	99	34	Male	Non-Hispanic White	5	More than high school	26.7	101.8	mild	never	no	122	83	no	0	4.885	20	24	79.56	285.5	0.971	4.34	1.22	2.689	228388.938	111.0436073	5.4	4.62	<30	57097.2345	<60	25-30	>=90	>=1.8
994	5734	2011-2012	67894	2	95	80	Male	Other Race	1.95	Less than high school	31.1	116	former	former	yes	98	50	DM	1	5.94	14	20	108.73	404.5	0.689	3.36	1.6	1.448	89823.714	55.09889719	32.0610687	0.29	>=30	22455.9285	>=60	>=30	<60	>=1.8
995	5742	2011-2012	67902	2	98	21	Male	Mexican American	1.07	High school or equivalent	27.3	95.9	heavy	never	no	119	71	no	0	5.829	20	22	76.91	362.8	1.118	4.97	1.32	3.129	91404.766	123.3685867	1.965811966	11.82	<30	22851.1915	<60	25-30	>=90	<1.3
996	5752	2011-2012	67912	2	102	65	Male	Other Race	5	More than high school	29.7	110.2	moderate	now	no	124	80	no	0	5.773	31	36	87.52	291.5	2.664	3.85	0.8	1.836	29344.085	79.59329949	5.032258065	-0.76	<30	7336.02125	>=60	25-30	60-90	>=1.8
997	5755	2011-2012	67915	2	96	24	Male	Other Race	2.2	More than high school	21.5	80.9	mild	never	no	120	68	no	0	5.662	22	19	77.79	440.2	1.897	5.3	1.37	3.051	36983.524	120.2298678	5.252525253	-0.66	<30	9245.881	<60	<25	>=90	>=1.8
998	5757	2011-2012	67917	1	103	27	Male	Non-Hispanic White	2.6	More than high school	26.9	93.3	mild	never	no	117	65	no	0	5.218	36	29	76.91	350.9	1.174	5.09	1.53	3.026	53323.761	118.2769401	15.56962025	0.55	<30	13330.94025	<60	25-30	>=90	>=1.8
999	5759	2011-2012	67919	1	97	59	Female	Non-Hispanic White	1.3	More than high school	26.6	97.6	mild	former	yes	131	83	no	0	4.996	17	18	52.16	261.7	1.377	6.15	1.42	4.112	449903.217	100.6456703	4.111111111	2.14	<30	112475.8043	<60	25-30	>=90	1.3-1.8
1000	5778	2011-2012	67938	1	93	27	Female	Other Race	5	More than high school	21.9	68.5	moderate	never	no	100	59	no	0	5.218	28	34	70.72	255.8	0.948	5.33	1.78	3.103	44601.809	101.3631125	3.615819209	-0.9	<30	11150.45225	<60	<25	>=90	>=1.8
1001	5779	2011-2012	67939	2	98	72	Male	Non-Hispanic White	5	Less than high school	24.7	93.5	mild	former	no	106	64	preDM	0	6.55	26	26	80.44	273.6	1.185	5.97	2.38	3.051	104046.904	83.90023068	2.047244094	1.61	<30	26011.726	>=60	<25	60-90	>=1.8
1002	5802	2011-2012	67962	2	95	40	Female	Non-Hispanic Black	3.85	More than high school	29.2	94.2	heavy	never	no	120	63	preDM	0	5.051	14	16	59.23	202.2	0.835	4.68	1.63	2.664	37898.171	127.1559459	10.92436975	-1.13	<30	9474.54275	<60	25-30	>=90	>=1.8
1003	5806	2011-2012	67966	1	100	20	Male	Non-Hispanic White	4.63	More than high school	19.8	77.4	heavy	never	no	114	56	no	0	4.774	16	13	90.17	374.7	0.948	4.16	1.24	2.483	239009.281	105.3138934	5.933014354	-0.9	<30	59752.32025	<60	<25	>=90	>=1.8
1004	5812	2011-2012	67972	2	96	30	Male	Non-Hispanic White	1.38	More than high school	30.5	105.3	heavy	now	no	125	73	no	0	5.662	36	28	104.31	493.7	1.129	4.27	1.14	2.612	193781.634	82.31337607	10.28340081	1.65	<30	48445.4085	<60	>=30	60-90	1.3-1.8
1005	5815	2011-2012	67975	2	98	76	Female	Non-Hispanic White	1.22	Less than high school	23.4	89	former	never	no	136	14	no	0	5.995	17	21	51.27	226	1.152	4.71	1.47	2.715	75376.899	89.82036654	9.787234043	-3.39	<30	18844.22475	>=60	<25	60-90	<1.3
1006	5818	2011-2012	67978	1	101	60	Female	Non-Hispanic White	0.13	More than high school	24.6	94.2	mild	now	no	119	69	DM	0	6.106	16	23	57.46	166.5	0.914	4.03	0.98	2.638	96554.896	96.80686645	7	-3.92	<30	24138.724	>=60	<25	>=90	<1.3
1007	5826	2011-2012	67986	1	96	63	Female	Non-Hispanic Black	3.97	More than high school	24.1	80.6	mild	never	no	105	63	no	0	5.662	23	29	50.39	202.2	1.219	5.46	1.24	3.646	35804.867	114.0946212	20.69565217	4.01	<30	8951.21675	>=60	<25	>=90	>=1.8
1008	5840	2011-2012	68000	1	99	65	Male	Non-Hispanic White	2.58	More than high school	22.9	84.5	mild	former	yes	120	51	no	0	4.996	12	19	88.4	345	0.779	4.34	2.07	1.914	51575.895	78.63202475	4.615384615	-2.9	<30	12893.97375	>=60	<25	60-90	>=1.8
1009	5844	2011-2012	68004	1	103	33	Female	Mexican American	5	More than high school	21.6	76.6	mild	never	no	101	65	no	0	4.885	13	20	64.53	196.3	0.869	4.55	1.66	2.508	81720.518	108.5560131	5.573770492	-2.77	<30	20430.1295	<60	<25	>=90	>=1.8
1010	5851	2011-2012	68011	1	95	27	Female	Non-Hispanic White	0.81	More than high school	43.6	120.1	mild	former	no	113	66	preDM	0	5.162	13	16	72.49	309.3	1.197	3.44	1.06	1.836	99040.488	98.38180456	5.441176471	-1.42	<30	24760.122	<60	>=30	>=90	<1.3
1011	5857	2011-2012	68017	3	92	68	Female	Mexican American	4.3	High school or equivalent	29.5	102.4	mild	never	yes	142	32	preDM	0	6.162	26	24	58.34	232	1.298	6.31	1.84	3.879	51637.603	91.05812222	4.421768707	-1.69	<30	12909.40075	>=60	25-30	>=90	>=1.8
1012	5862	2011-2012	68022	3	92	58	Male	Mexican American	5	More than high school	31.7	105.8	heavy	now	yes	129	89	no	0	5.718	87	89	61	398.5	1.784	3.72	0.7	2.198	76467.202	104.6410817	14.72222222	4.55	<30	19116.8005	<60	>=30	>=90	>=1.8
1013	5867	2011-2012	68027	2	100	41	Female	Non-Hispanic Black	2.7	More than high school	33.1	100.3	moderate	never	yes	114	51	no	0	4.996	21	27	70.72	315.2	1.163	5.25	1.45	3.258	40014.023	105.9046459	6.363636364	6.21	<30	10003.50575	<60	>=30	>=90	>=1.8
1014	5868	2011-2012	68028	1	100	66	Female	Non-Hispanic Black	3.97	High school or equivalent	30.5	96.2	former	never	yes	119	50	no	1	4.885	17	25	173.26	624.5	1.84	5.04	1.32	2.87	58488.704	30.07076169	55.76923077	-4.62	>=30	14622.176	>=60	>=30	<60	>=1.8
1015	5872	2011-2012	68032	2	100	80	Female	Non-Hispanic White	2.01	More than high school	33.1	94.8	former	never	yes	119	60	no	0	5.995	21	22	61.88	333.1	1.547	6.08	1.55	3.827	90927.777	82.0922902	8.376623377	-1	<30	22731.94425	>=60	>=30	60-90	>=1.8
1016	5878	2011-2012	68038	1	96	68	Male	Non-Hispanic Black	5	High school or equivalent	29.5	104.6	moderate	now	yes	129	81	no	0	5.773	10	23	106.08	458	1.129	5.28	1.14	3.62	17380.303	71.39792159	4.675324675	-3.99	<30	4345.07575	>=60	25-30	60-90	>=1.8
1017	5892	2011-2012	68052	1	101	39	Male	Non-Hispanic White	0.58	Less than high school	32.3	118.5	mild	now	yes	131	78	preDM	0	5.995	26	19	69.84	267.7	1.614	4.47	1.19	2.534	51691.304	113.1120155	5	-1.89	<30	12922.826	<60	>=30	>=90	<1.3
1018	5898	2011-2012	68058	2	98	50	Male	Non-Hispanic White	2.7	More than high school	30.6	113.6	moderate	now	yes	NA	NA	no	0	5.995	21	17	75.14	285.5	1.219	5.35	1.34	3.439	274808.257	101.597736	2.237762238	0.91	<30	68702.06425	<60	>=30	>=90	>=1.8
1019	5904	2011-2012	68064	2	98	80	Female	Mexican American	0.82	High school or equivalent	39.3	123.3	never	never	yes	104	47	DM	1	14.988	14	18	91.05	339	1.366	4.6	1.27	2.715	36909.226	51.46425585	4.166666667	-0.09	<30	9227.3065	>=60	>=30	<60	<1.3
1020	5905	2011-2012	68065	1	98	20	Female	Non-Hispanic White	0.9	More than high school	25.3	82.5	heavy	never	no	120	77	no	0	5.107	12	15	76.02	267.7	1.445	5.09	1.06	3.362	252368.112	97.55788238	5.929648241	6.81	<30	63092.028	<60	25-30	>=90	<1.3
1021	5906	2011-2012	68066	2	100	63	Female	Non-Hispanic Black	5	More than high school	38.8	129.9	mild	never	yes	126	57	preDM	0	6.661	20	34	83.1	505.6	1.095	4.32	0.85	2.974	35762.78	74.66596779	7.524752475	-3.48	<30	8940.695	>=60	>=30	60-90	>=1.8
1022	5908	2011-2012	68068	2	91	79	Female	Non-Hispanic White	5	More than high school	22.5	79.7	mild	never	yes	175	98	no	0	5.829	17	24	74.26	267.7	1.073	7.6	2.77	4.344	191497.517	66.3167137	20	-0.62	<30	47874.37925	>=60	<25	60-90	>=1.8
1023	5942	2011-2012	68102	2	90	75	Male	Other Race	0.46	Less than high school	33.5	114.8	mild	never	yes	141	62	DM	0	6.994	28	37	77.79	315.2	0.824	3.52	1.34	1.784	37215.052	84.02800313	14.87951807	-5.03	<30	9303.763	>=60	>=30	60-90	<1.3
1024	5949	2011-2012	68109	2	100	45	Male	Non-Hispanic Black	2.7	High school or equivalent	27.1	93.1	moderate	now	yes	140	79	no	0	4.718	125	71	99.89	392.6	1.073	4.06	1.11	2.457	63928.247	90.24250505	8.719723183	-0.34	<30	15982.06175	<60	25-30	>=90	>=1.8
1025	5950	2011-2012	68110	1	91	60	Male	Non-Hispanic White	4.49	More than high school	22.6	88.3	mild	never	no	109	71	preDM	0	5.995	21	26	76.91	243.9	0.418	4.86	1.11	3.569	240469.556	93.80484732	6.4	81.61	<30	60117.389	>=60	<25	>=90	>=1.8
1026	5955	2011-2012	68115	2	97	80	Female	Non-Hispanic White	2.11	More than high school	25.7	84.8	heavy	never	yes	143	66	DM	1	7.105	19	31	84.86	428.3	1.344	5.22	1.42	3.181	117483.314	56.03507807	27.5	-2.73	<30	29370.8285	>=60	25-30	<60	>=1.8
1027	5961	2011-2012	68121	2	95	70	Male	Non-Hispanic White	5	More than high school	24.8	97.4	mild	never	yes	151	64	no	0	5.051	16	25	61	398.5	1.637	7.96	2.22	4.991	127049.041	96.18186688	5.565217391	-0.91	<30	31762.26025	>=60	<25	>=90	>=1.8
1028	5968	2011-2012	68128	1	93	58	Male	Non-Hispanic White	0.75	More than high school	26.1	110.5	heavy	now	no	118	63	no	0	5.995	19	38	61.88	267.7	0.576	3.8	1.84	1.707	58635.471	104.0240845	4.959016393	0.67	<30	14658.86775	<60	25-30	>=90	<1.3
1029	5973	2011-2012	68133	2	93	44	Male	Other Race	1.52	More than high school	28	103	heavy	former	yes	126	80	no	0	5.94	22	18	78.68	345	1.795	6.28	1.01	4.448	71666.533	103.9873295	3.308270677	-3.32	<30	17916.63325	<60	25-30	>=90	1.3-1.8
1030	5980	2011-2012	68140	2	97	30	Male	Non-Hispanic Black	0	High school or equivalent	24.9	77.3	heavy	now	no	116	68	preDM	0	6.162	20	25	113.15	356.9	1.908	3.8	1.16	1.758	73932.641	86.24370391	3.157894737	3.81	<30	18483.16025	<60	<25	60-90	<1.3
1031	5995	2011-2012	68155	1	100	40	Female	Non-Hispanic Black	2.59	More than high school	28.4	98.4	mild	never	yes	140	99	preDM	0	6.384	12	15	69.84	220.1	0.474	5.12	1.29	3.62	57833.674	108.2855246	12.32876712	3.52	<30	14458.4185	<60	25-30	>=90	>=1.8
1032	6009	2011-2012	68169	1	92	23	Female	Non-Hispanic White	1.15	More than high school	26.4	90.4	mild	never	no	116	65	no	0	4.996	21	19	110.5	505.6	0.824	4.97	0.98	3.595	129620.052	60.7791374	10.52959502	2.45	<30	32405.013	<60	25-30	60-90	<1.3
1033	6016	2011-2012	68176	2	99	58	Female	Non-Hispanic Black	2.24	Less than high school	32.4	105.4	mild	now	yes	132	76	DM	0	5.218	14	18	76.02	255.8	1.106	5.51	1.68	3.31	37137.603	86.11511851	5.05952381	-0.64	<30	9284.40075	<60	>=30	60-90	>=1.8
1034	6020	2011-2012	68180	1	90	31	Male	Non-Hispanic Black	2.96	More than high school	25.3	76.3	moderate	former	no	121	73	no	0	5.551	20	22	91.05	333.1	0.745	4.53	1.22	2.974	67290.579	111.371302	4.426229508	7.94	<30	16822.64475	<60	25-30	>=90	>=1.8
1035	6031	2011-2012	68191	1	98	56	Female	Non-Hispanic White	0.5	High school or equivalent	27.5	101.2	heavy	former	no	121	70	no	0	5.218	28	26	68.07	255.8	0.971	6.26	1.45	4.37	73442.343	86.59177687	3.551401869	1.51	<30	18360.58575	<60	25-30	60-90	<1.3
1036	6037	2011-2012	68197	1	98	59	Male	Non-Hispanic White	5	High school or equivalent	31.9	111.2	moderate	never	no	131	77	no	0	5.718	21	21	80.44	356.9	2.202	5.15	1.27	2.87	392211.749	91.92273223	7.068965517	-0.43	<30	98052.93725	<60	>=30	>=90	>=1.8
1037	6039	2011-2012	68199	2	92	30	Female	Other Race	4.03	More than high school	39.1	104.4	mild	never	no	104	73	no	1	4.885	14	13	211.28	392.6	0.982	3.96	1.45	2.069	66878.588	26.42898078	7.049180328	-0.48	<30	16719.647	<60	>=30	<60	>=1.8
1038	6043	2011-2012	68203	1	95	78	Female	Other Race	1.12	More than high school	31.7	111.4	never	never	yes	142	50	no	1	6.106	16	23	94.59	243.9	1.513	5.43	1.4	3.336	163992.655	49.84279843	23.14285714	-1.47	<30	40998.16375	>=60	>=30	<60	<1.3
1039	6076	2011-2012	68236	1	94	41	Female	Other Race	1.26	More than high school	47.2	132.3	former	never	yes	132	87	no	0	5.218	22	21	55.69	321.2	1.174	4.14	1.53	2.069	61309.695	111.7727393	9.587628866	0.51	<30	15327.42375	<60	>=30	>=90	<1.3
1040	6077	2011-2012	68237	1	94	63	Male	Non-Hispanic White	2.41	More than high school	29.6	102.5	mild	former	no	116	68	no	0	5.607	21	24	76.91	398.5	0.903	4.6	1.19	3	249027.202	91.84870267	3.333333333	0.31	<30	62256.8005	>=60	25-30	>=90	>=1.8
1041	6089	2011-2012	68249	1	94	60	Male	Non-Hispanic White	3.97	More than high school	27.6	104.3	mild	never	yes	111	72	no	0	6.051	17	21	73.37	315.2	0.892	4.45	1.24	2.793	258721.876	95.63714388	4.777777778	-0.35	<30	64680.469	>=60	25-30	>=90	>=1.8
1042	6103	2011-2012	68263	1	91	63	Female	Non-Hispanic White	3.78	More than high school	24.1	92	mild	never	yes	141	78	DM	0	9.603	21	21	66.3	291.5	1.061	5.38	1.94	2.948	287755.997	85.10196935	20.73170732	-0.63	<30	71938.99925	>=60	<25	60-90	>=1.8
1043	6110	2011-2012	68270	2	94	48	Female	Other Race	4.21	Less than high school	34	112.5	never	never	yes	118	87	no	0	5.44	20	23	62.76	255.8	1.773	5.74	0.98	3.957	73638.417	101.0365729	3.197278912	3.25	<30	18409.60425	<60	>=30	>=90	>=1.8
1044	6113	2011-2012	68273	1	99	31	Male	Non-Hispanic White	0.89	More than high school	27.8	100.9	mild	former	no	116	76	no	0	5.218	20	24	82.21	368.8	0.982	5.15	1.27	3.439	134136.737	109.0006594	7.527472527	9.14	<30	33534.18425	<60	25-30	>=90	<1.3
1045	6115	2011-2012	68275	1	99	71	Male	Non-Hispanic Black	5	More than high school	32.5	106.1	never	never	yes	125	77	DM	1	7.05	32	22	122.88	398.5	0.937	2.87	1.37	1.06	17199.384	58.52730787	8.87804878	-0.43	<30	4299.846	>=60	>=30	<60	>=1.8
1046	6125	2011-2012	68285	1	94	49	Female	Non-Hispanic White	3.97	High school or equivalent	41	101.9	former	never	no	102	73	DM	0	6.883	22	20	73.37	303.3	0.7	4.99	1.29	3.388	224582.918	83.0680059	2.931726908	0.75	<30	56145.7295	<60	>=30	60-90	>=1.8
1047	6133	2011-2012	68293	1	98	54	Male	Non-Hispanic White	1.98	More than high school	28.2	99.2	heavy	never	no	120	72	preDM	0	5.44	69	92	94.59	362.8	1.84	3.57	0.88	1.836	392338.503	78.27674141	2.5	-4.3	<30	98084.62575	<60	25-30	60-90	>=1.8
1048	6141	2011-2012	68301	2	91	59	Male	Non-Hispanic White	0.63	High school or equivalent	32.6	121.3	heavy	now	yes	202	99	DM	0	6.328	34	31	53.04	362.8	1.885	7.4	1.09	5.456	333656.838	110.0520866	12.08	0.24	<30	83414.2095	<60	>=30	>=90	<1.3
1049	6149	2011-2012	68309	3	91	57	Male	Other Race	1.33	More than high school	23.4	87.8	mild	former	no	122	84	no	0	5.829	22	23	89.28	380.7	2.292	6.41	1.16	4.189	37506.853	82.18279927	4	-1.25	<30	9376.71325	<60	<25	60-90	1.3-1.8
1050	6154	2011-2012	68314	2	103	31	Male	Non-Hispanic Black	1.3	High school or equivalent	36.6	111.5	moderate	never	yes	153	105	no	0	5.495	38	27	99.01	463.9	1.298	6.1	1.4	4.112	59837.737	100.6442371	4.285714286	-2.07	<30	14959.43425	<60	>=30	>=90	1.3-1.8
1051	6159	2011-2012	68319	2	100	43	Female	Non-Hispanic White	4.5	More than high school	30.6	101.3	moderate	never	no	NA	NA	preDM	0	6.661	33	25	68.95	327.1	3.082	5.04	0.98	2.638	213431.011	93.40310917	5.753424658	-1.04	<30	53357.75275	<60	>=30	>=90	>=1.8
1052	6164	2011-2012	68324	2	95	27	Female	Non-Hispanic White	5	More than high school	29.8	99.4	heavy	now	no	104	68	no	0	5.051	18	19	61	196.3	0.598	5.12	1.97	2.87	180063.047	119.6873099	8.962025316	-5.99	<30	45015.76175	<60	25-30	>=90	>=1.8
1053	6167	2011-2012	68327	2	100	80	Male	Non-Hispanic White	2.01	More than high school	25.3	91.7	former	never	yes	159	51	no	1	5.662	15	24	120.22	350.9	0.463	3.34	1.01	2.121	61168.682	48.79660935	70.16393443	-2.33	>=30	15292.1705	>=60	25-30	<60	>=1.8
1054	6170	2011-2012	68330	1	95	69	Female	Non-Hispanic White	1.94	Less than high school	29.6	95.5	mild	never	no	125	69	DM	0	8.882	14	19	66.3	285.5	1.163	3.47	1.16	1.758	255708.074	81.58965584	6.564885496	0.18	<30	63927.0185	>=60	25-30	60-90	>=1.8
1055	6171	2011-2012	68331	3	92	66	Male	Mexican American	5	More than high school	32.9	114.9	heavy	never	no	138	83	DM	0	6.55	28	28	86.63	416.4	2.224	5.61	1.03	3.569	30327.17	80.0122313	10.71428571	-0.16	<30	7581.7925	>=60	>=30	60-90	>=1.8
1056	6174	2011-2012	68334	2	99	38	Female	Non-Hispanic Black	0.56	High school or equivalent	32.5	108.3	moderate	never	yes	107	69	preDM	0	6.384	25	29	82.21	368.8	3.116	4.5	1.19	1.888	63406.839	90.15860356	4.360465116	-1.28	<30	15851.70975	<60	>=30	>=90	<1.3
1057	6177	2011-2012	68337	2	102	36	Male	Mexican American	3.04	More than high school	37.6	137.8	moderate	never	no	121	74	no	0	5.607	39	25	69.84	392.6	1.219	4.63	0.91	3.155	82054.901	115.5210148	3.309090909	-2.32	<30	20513.72525	<60	>=30	>=90	>=1.8
1058	6181	2011-2012	68341	2	93	64	Female	Other Race	3.04	Less than high school	24	93	mild	never	yes	131	60	DM	0	5.162	21	24	53.92	190.3	1.185	5.22	1.27	3.414	29939.513	96.11211522	20.125	1.69	<30	7484.87825	>=60	<25	>=90	>=1.8
1059	6193	2011-2012	68353	1	101	36	Male	Non-Hispanic White	4.21	More than high school	26.8	95.3	moderate	never	no	122	64	no	0	5.162	22	25	94.59	356.9	0.982	5.17	1.55	3.181	209307.965	88.82725985	2.083333333	2.7	<30	52326.99125	<60	25-30	60-90	>=1.8
1060	6196	2011-2012	68356	2	97	73	Female	Non-Hispanic Black	3.49	More than high school	27.8	107.2	heavy	now	yes	NA	NA	DM	1	5.384	17	21	44.2	380.7	1.095	6.03	2.69	2.845	54128.772	111.0399741	39.32432432	-0.2	>=30	13532.193	>=60	25-30	>=90	>=1.8
1061	6207	2011-2012	68367	1	96	78	Male	Non-Hispanic Black	3.14	Less than high school	31.7	116.8	moderate	now	yes	178	83	DM	1	5.273	13	17	114.04	410.4	1.005	3.1	1.11	1.526	24151.843	60.98249954	100.6299213	-0.49	>=30	6037.96075	>=60	>=30	60-90	>=1.8
1062	6217	2011-2012	68377	1	93	74	Male	Non-Hispanic White	0.93	More than high school	23.6	95.5	mild	now	no	113	49	DM	1	6.883	15	21	99.89	350.9	1.49	4.5	1.11	2.715	17756.176	63.67527907	30.52380952	-0.98	>=30	4439.044	>=60	<25	60-90	<1.3
1063	6224	2011-2012	68384	1	98	23	Female	Non-Hispanic White	0.63	More than high school	34.3	114.5	heavy	never	no	118	76	no	0	5.44	18	22	71.6	350.9	0.598	3.88	1.37	2.224	126516.163	102.6976131	5.949367089	0.05	<30	31629.04075	<60	>=30	>=90	<1.3
1064	6233	2011-2012	68393	1	98	20	Female	Non-Hispanic Black	0.11	More than high school	28.7	81.6	moderate	never	no	112	62	no	0	4.885	13	20	63.65	267.7	0.508	5.3	1.91	3.155	55823.919	139.4124631	8.289473684	7.37	<30	13955.97975	<60	25-30	>=90	<1.3
1065	6234	2011-2012	68394	2	98	58	Female	Non-Hispanic White	5	More than high school	27.7	96.2	mild	never	yes	122	73	no	0	5.218	17	18	71.6	297.4	1.039	5.04	1.99	2.586	307777.868	80.31266687	3.522727273	3.06	<30	76944.467	<60	25-30	60-90	>=1.8
1066	6241	2011-2012	68401	2	90	43	Male	Mexican American	0.46	Less than high school	23.9	86.2	heavy	former	no	110	60	no	0	5.718	25	25	58.34	267.7	1.976	4.86	1.03	2.922	68857.604	118.4125986	19.56521739	1.1	<30	17214.401	<60	<25	>=90	<1.3
1067	6244	2011-2012	68404	2	96	65	Female	Non-Hispanic Black	1.1	More than high school	32.5	106.1	never	never	no	114	68	preDM	0	6.273	19	18	65.42	202.2	1.219	7.09	1.78	4.732	44942.462	98.31767989	5.585106383	-3.52	<30	11235.6155	>=60	>=30	>=90	<1.3
1068	6252	2011-2012	68412	1	101	32	Male	Non-Hispanic White	1.05	Less than high school	18.8	71.8	mild	now	no	116	67	no	0	4.663	13	15	105.2	315.2	1.4	4.19	0.83	2.715	57642.179	80.34113856	5.138888889	-3.7	<30	14410.54475	<60	<25	60-90	<1.3
1069	6264	2011-2012	68424	1	97	72	Male	Other Race	2.29	Less than high school	26.8	92.8	never	never	yes	121	70	no	0	5.44	15	14	99.01	374.7	1.14	3.21	1.24	1.448	45811.391	65.27390707	16.96969697	-5.52	<30	11452.84775	>=60	25-30	60-90	>=1.8
1070	6268	2011-2012	68428	2	95	44	Female	Non-Hispanic White	0.63	Less than high school	41.1	123.5	heavy	never	yes	119	68	no	1	4.496	17	22	54.81	297.4	1.039	4.16	1.11	2.586	57267.758	110.0195376	52.63157895	-5.46	>=30	14316.9395	<60	>=30	>=90	<1.3
1071	6272	2011-2012	68432	3	90	80	Male	Other Race	0.78	High school or equivalent	23.3	92.7	former	former	yes	172	60	DM	1	8.993	13	22	178.57	350.9	1.355	6.05	1.58	3.853	25656.406	30.24603014	321.7391304	-2.76	>=30	6414.1015	>=60	<25	<60	<1.3
1072	6287	2011-2012	68447	1	95	68	Female	Non-Hispanic White	0.78	More than high school	41.2	130.5	never	never	yes	143	67	DM	0	6.939	43	48	69.84	493.7	1.524	5.59	1.55	3.336	98732.073	77.1620517	22.84974093	-1.79	<30	24683.01825	>=60	>=30	60-90	<1.3
1073	6290	2011-2012	68450	2	91	47	Female	Other Race	3.31	More than high school	20.4	71.8	heavy	now	no	112	77	preDM	0	5.495	25	27	60.11	273.6	0.79	5.25	1.99	2.896	57317.036	104.5006506	16	-1.49	<30	14329.259	<60	<25	>=90	>=1.8
1074	6291	2011-2012	68451	2	100	24	Male	Non-Hispanic Black	1.38	More than high school	24.4	81.8	mild	never	no	110	72	no	0	5.662	18	19	93.7	237.9	0.824	3.88	1.27	2.224	65953.832	112.9936327	4.909090909	-3.64	<30	16488.458	<60	<25	>=90	1.3-1.8
1075	6292	2011-2012	68452	2	90	69	Female	Other Race	1.47	Less than high school	31.9	102.5	never	never	no	119	60	no	0	5.218	14	20	68.95	279.6	0.474	4.53	2.04	2.276	35139.951	77.81114284	14.07407407	-4.17	<30	8784.98775	>=60	>=30	60-90	1.3-1.8
1076	6293	2011-2012	68453	2	93	79	Female	Non-Hispanic White	2.31	High school or equivalent	32	103.2	never	never	yes	148	73	DM	0	6.772	25	25	77.79	309.3	1.479	5.4	1.76	2.974	130823.703	62.68983156	10.95238095	-0.31	<30	32705.92575	>=60	>=30	60-90	>=1.8
1077	6302	2011-2012	68462	1	94	49	Male	Non-Hispanic White	0.79	Less than high school	22.4	85.9	mild	now	no	128	79	no	0	5.329	17	20	87.52	386.6	1.264	6.59	1.76	4.267	61131.021	89.06119797	7.516339869	0.48	<30	15282.75525	<60	<25	60-90	<1.3
1078	6308	2011-2012	68468	2	90	61	Male	Other Race	1.7	Less than high school	22.8	85.4	former	former	no	114	66	no	0	5.829	16	19	86.63	374.7	1.66	4.84	0.96	3.129	20683.717	82.87244255	4.553571429	-2.9	<30	5170.92925	>=60	<25	60-90	1.3-1.8
1079	6309	2011-2012	68469	2	94	25	Male	Non-Hispanic White	1.01	More than high school	32.3	107.6	heavy	now	no	110	72	no	0	5.495	87	33	88.4	559.1	1.197	4.86	1.03	3.284	65002.45	104.1428645	5.045592705	-4.8	<30	16250.6125	<60	>=30	>=90	<1.3
1080	6314	2011-2012	68474	2	94	35	Male	Non-Hispanic White	4.71	More than high school	26.5	96.5	mild	never	no	114	78	no	0	5.44	28	18	88.4	386.6	1.614	5.28	1.06	3.465	263257.756	97.07826455	4.355828221	0.86	<30	65814.439	<60	25-30	>=90	>=1.8
1081	6318	2011-2012	68478	2	94	41	Male	Non-Hispanic White	2.91	More than high school	30.5	104.7	mild	never	no	128	71	no	0	5.607	25	19	86.63	493.7	2.224	5.64	1.09	3.543	242654.287	95.37293974	4.615384615	0.99	<30	60663.57175	<60	>=30	>=90	>=1.8
1082	6325	2011-2012	68485	3	91	64	Female	Non-Hispanic White	2.3	More than high school	30.3	107.8	moderate	never	no	123	65	no	0	5.662	21	23	86.63	321.2	0.723	6.18	1.86	3.982	301924.623	61.15691936	13.52941176	-0.34	<30	75481.15575	>=60	>=30	60-90	>=1.8
1083	6328	2011-2012	68488	2	95	58	Female	Non-Hispanic Black	1.61	More than high school	29.4	104	moderate	now	yes	NA	NA	preDM	1	6.495	22	28	78.68	463.9	1.569	5.95	1.55	3.672	42070.747	82.61815897	75.8490566	-0.15	>=30	10517.68675	<60	25-30	60-90	1.3-1.8
1084	6333	2011-2012	68493	3	91	29	Male	Other Race	1.08	More than high school	21.7	82.1	never	never	no	103	73	no	0	5.218	19	24	81.33	285.5	1.039	3.54	0.91	2.172	26288.492	111.9971651	4.666666667	-0.69	<30	6572.123	<60	<25	>=90	<1.3
1085	6334	2011-2012	68494	2	100	38	Female	Non-Hispanic White	0	High school or equivalent	24.8	83.6	moderate	now	no	110	61	DM	0	7.66	152	86	56.58	202.2	0.971	4.84	2.3	2.095	52322.947	113.5632934	8.932038835	17.95	<30	13080.73675	<60	<25	>=90	<1.3
1086	6335	2011-2012	68495	2	96	78	Female	Non-Hispanic White	0.87	High school or equivalent	33.3	114.9	never	never	yes	134	66	DM	1	7.216	24	27	93.7	440.2	2.36	5.77	1.19	3.491	63711.531	50.41184752	28.73684211	2.43	<30	15927.88275	>=60	>=30	<60	<1.3
1087	6339	2011-2012	68499	1	91	58	Male	Non-Hispanic White	5	More than high school	24.1	94.1	moderate	now	no	110	79	no	0	5.94	17	17	85.75	285.5	1.185	5.28	1.16	3.569	380108.223	85.69346278	7.976190476	5.91	<30	95027.05575	<60	<25	60-90	>=1.8
1088	6341	2011-2012	68501	1	94	52	Male	Non-Hispanic White	1.67	More than high school	29.2	106.5	heavy	never	no	129	49	no	0	4.94	44	38	106.08	255.8	1.016	5.77	0.78	4.526	314300.516	69.10812369	3.064516129	4.21	<30	78575.129	<60	25-30	60-90	1.3-1.8
1089	6342	2011-2012	68502	2	99	27	Male	Non-Hispanic Black	1.43	More than high school	28.9	99.2	moderate	never	no	123	67	no	0	4.663	19	28	88.4	374.7	0.914	3.03	1.11	1.5	73653.297	118.7125155	4.550561798	1.22	<30	18413.32425	<60	25-30	>=90	1.3-1.8
1090	6346	2011-2012	68506	1	101	77	Female	Non-Hispanic White	1.22	More than high school	36.9	119.8	former	former	yes	97	57	DM	1	6.106	26	35	191.83	588.9	1.637	5.66	1.09	3.827	72760.043	21.35002257	2.068965517	-4.18	<30	18190.01075	>=60	>=30	<60	<1.3
1091	6353	2011-2012	68513	1	95	69	Female	Non-Hispanic White	2.04	More than high school	24.7	81	mild	former	no	126	80	no	0	5.273	19	26	61	327.1	0.61	4.84	1.5	3.051	113111.136	89.10796849	11.28787879	-1.12	<30	28277.784	>=60	<25	60-90	>=1.8
1092	6356	2011-2012	68516	1	100	30	Male	Non-Hispanic Black	3.13	More than high school	25.5	82.4	mild	never	no	124	52	no	0	5.495	20	17	121.11	315.2	0.519	5.2	1.32	3.646	110895.609	79.44180212	2.672955975	-0.4	<30	27723.90225	<60	25-30	60-90	>=1.8
1093	6365	2011-2012	68525	1	102	39	Female	Mexican American	0.92	High school or equivalent	34.4	102	never	never	yes	160	75	DM	0	7.05	34	27	53.92	249.8	1.648	4.65	1.03	2.87	82711.993	114.5636714	26.4516129	-1.31	<30	20677.99825	<60	>=30	>=90	<1.3
1094	6369	2011-2012	68529	2	95	80	Female	Non-Hispanic White	1.79	More than high school	18.9	79.8	never	never	yes	143	61	no	0	5.44	15	20	75.14	297.4	0.881	6.49	2.33	3.75	107390.781	64.9169969	5.348837209	-2.11	<30	26847.69525	>=60	<25	60-90	1.3-1.8
1095	6371	2011-2012	68531	1	96	60	Male	Non-Hispanic Black	5	More than high school	27.3	105.2	never	never	yes	164	106	DM	0	6.939	27	25	127.3	493.7	0.971	5.43	1.68	3.31	14499.087	60.58448982	5.301204819	-1.26	<30	3624.77175	>=60	25-30	60-90	>=1.8
1096	6389	2011-2012	68549	1	92	67	Male	Other Race	0.88	Less than high school	24.9	95.4	mild	former	no	115	64	preDM	0	6.439	24	NA	76.02	273.6	1.185	5.9	1.19	4.163	17646.196	89.72915332	4.715447154	-2.07	<30	4411.549	>=60	<25	60-90	<1.3
1097	6393	2011-2012	68553	1	98	61	Female	Non-Hispanic White	1.11	High school or equivalent	35.2	111.2	former	now	yes	108	63	DM	1	6.55	17	22	57.46	309.3	1.479	4.97	1.37	2.922	296184.477	96.12921839	31.08695652	-4.04	>=30	74046.11925	>=60	>=30	>=90	<1.3
1098	6400	2011-2012	68560	1	95	28	Female	Mexican American	1.37	More than high school	48.8	140.6	mild	now	yes	132	81	no	0	5.162	17	18	61	362.8	1.264	4.24	0.93	2.741	129301.966	118.8494987	13.9869281	3.15	<30	32325.4915	<60	>=30	>=90	1.3-1.8
1099	6411	2011-2012	68571	1	103	53	Male	Other Race	0.65	More than high school	25.3	103	heavy	former	no	111	70	DM	0	6.217	28	26	68.07	285.5	1.389	5.59	1.34	3.595	26412.9	103.6037001	8.615384615	-1.52	<30	6603.225	<60	25-30	>=90	<1.3
1100	6412	2011-2012	68572	2	93	42	Male	Non-Hispanic White	3.77	More than high school	26.7	98.8	heavy	now	yes	113	61	no	0	5.551	20	23	64.53	458	2.45	5.02	1.4	2.508	242181.249	114.4077713	9.846153846	-2.24	<30	60545.31225	<60	25-30	>=90	>=1.8
1101	6413	2011-2012	68573	3	91	64	Male	Other Race	3.24	Less than high school	21	84.9	moderate	former	no	118	77	no	0	4.996	24	28	74.26	249.8	1.603	6.62	1.45	4.448	19023.65	92.5307114	14.18181818	-3.69	<30	4755.9125	>=60	<25	>=90	>=1.8
1102	6414	2011-2012	68574	2	98	20	Male	Mexican American	1.53	More than high school	23.9	88.9	moderate	never	no	114	72	no	0	5.495	19	30	91.94	404.5	1.264	5.22	1.5	3.155	76609.537	102.8702912	11.2244898	-2.29	<30	19152.38425	<60	<25	>=90	1.3-1.8
1103	6415	2011-2012	68575	2	93	42	Female	Other Race	3.52	More than high school	26.5	89.7	moderate	never	no	115	72	no	0	4.718	12	16	61.88	261.7	0.745	4.37	1.91	2.121	70772.334	107.2089219	6.821705426	0.82	<30	17693.0835	<60	25-30	>=90	>=1.8
1104	6421	2011-2012	68581	2	100	43	Male	Non-Hispanic Black	4.97	More than high school	27	93.4	mild	never	no	124	67	no	0	5.107	40	45	89.28	428.3	0.994	4.34	1.01	2.87	58098.381	104.8238105	2.521008403	-1.23	<30	14524.59525	<60	25-30	>=90	>=1.8
1105	6422	2011-2012	68582	1	96	42	Female	Non-Hispanic Black	3.35	More than high school	32	102.5	heavy	never	no	110	64	DM	0	18.651	17	17	61	237.9	1.163	7.19	1.11	5.534	42760.897	124.1745026	3.917525773	-0.31	<30	10690.22425	<60	>=30	>=90	>=1.8
1106	6431	2011-2012	68591	1	99	67	Male	Non-Hispanic Black	4.86	More than high school	32	110.8	mild	never	yes	142	70	DM	0	6.883	22	22	73.37	368.8	1.084	4.84	0.98	3.362	18199.96	105.2542956	5.428571429	2.71	<30	4549.99	>=60	>=30	>=90	>=1.8
1107	6434	2011-2012	68594	1	95	80	Male	Non-Hispanic White	0.92	High school or equivalent	25.4	103.2	former	never	no	131	65	DM	0	5.273	20	20	87.52	339	1.389	3.78	1.01	2.121	26888.047	71.63334573	10.76923077	-0.64	<30	6722.01175	>=60	25-30	60-90	<1.3
1108	6441	2011-2012	68601	1	95	26	Male	Other Race	0.73	More than high school	22	84.2	heavy	never	no	116	76	no	0	5.273	64	32	69.84	362.8	3.511	4.71	1.01	2.095	21965.84	123.9277345	1.4	-0.63	<30	5491.46	<60	<25	>=90	<1.3
1109	6442	2011-2012	68602	2	96	36	Male	Mexican American	1.11	Less than high school	29.3	95.7	mild	never	no	109	63	no	0	6.106	30	19	91.05	273.6	1.298	5.17	0.93	3.646	72132.497	93.01458393	2.478632479	-3.74	<30	18033.12425	<60	25-30	>=90	<1.3
1110	6463	2011-2012	68623	1	93	28	Male	Other Race	5	More than high school	24.5	93.3	heavy	now	no	130	55	preDM	1	6.495	125	116	83.1	541.3	3.229	7.96	1.34	5.146	24963.345	109.8919018	50.09259259	-1.61	>=30	6240.83625	<60	<25	>=90	>=1.8
1111	6485	2011-2012	68645	2	93	75	Female	Non-Hispanic White	2.51	More than high school	25.4	107.4	never	never	yes	116	61	DM	1	5.94	17	23	160.89	458	1.208	5.84	1.32	3.982	119400.312	26.78263801	175.8333333	-5.22	>=30	29850.078	>=60	25-30	<60	>=1.8
1112	6488	2011-2012	68648	1	91	30	Female	Non-Hispanic White	3.06	More than high school	20.4	81.1	mild	never	no	103	59	no	0	5.051	20	20	69.84	297.4	0.576	4.97	1.97	2.741	186970.879	100.7702472	14.61538462	-0.21	<30	46742.71975	<60	<25	>=90	>=1.8
1113	6491	2011-2012	68651	1	93	32	Female	Non-Hispanic White	5	More than high school	27.9	98.5	mild	never	no	105	54	no	1	5.273	21	28	56.58	368.8	0.994	5.51	1.55	3.491	190451.084	118.4520245	46.03174603	1.17	>=30	47612.771	<60	25-30	>=90	>=1.8
1114	6492	2011-2012	68652	1	98	34	Male	Non-Hispanic White	2.2	More than high school	35.3	120.5	former	never	yes	120	80	no	0	5.829	21	22	82.21	392.6	1.152	3.54	0.93	2.095	196331.278	106.7276312	8.333333333	-2.59	<30	49082.8195	<60	>=30	>=90	>=1.8
1115	6501	2011-2012	68661	2	99	64	Female	Non-Hispanic Black	5	More than high school	32.6	105.5	mild	never	yes	125	67	no	0	4.552	20	24	89.28	273.6	0.948	5.4	2.04	2.922	41295.649	67.97652841	5.6	-1.86	<30	10323.91225	>=60	>=30	60-90	>=1.8
1116	6515	2011-2012	68675	1	100	73	Female	Other Race	4.63	More than high school	24	81.3	never	never	no	139	84	no	0	4.996	17	23	70.72	237.9	0.847	4.6	2.12	2.095	39750.438	73.37453608	5.714285714	-3.09	<30	9937.6095	>=60	<25	60-90	>=1.8
1117	6516	2011-2012	68676	2	97	51	Female	Non-Hispanic Black	0.81	High school or equivalent	35	105.1	never	never	no	105	73	DM	1	7.549	13	16	33.59	297.4	0.994	4.97	1.71	2.793	45528.535	141.8430996	76.4	-2.96	>=30	11382.13375	<60	>=30	>=90	<1.3
1118	6520	2011-2012	68680	1	98	22	Female	Non-Hispanic White	0.45	More than high school	28.8	89.5	heavy	never	no	116	72	no	0	5.051	13	19	66.3	291.5	0.666	3.8	1.42	2.069	107677.106	113.5064189	13.05785124	1.07	<30	26919.2765	<60	25-30	>=90	<1.3
1119	6529	2011-2012	68689	2	92	70	Female	Other Race	1.36	Less than high school	33.7	98.3	former	never	yes	142	66	DM	0	10.602	21	25	72.49	321.2	0.96	3.57	1.11	2.017	44350.167	72.73316219	18.83870968	-0.11	<30	11087.54175	>=60	>=30	60-90	1.3-1.8
1120	6533	2011-2012	68693	1	95	28	Male	Non-Hispanic White	4.14	More than high school	25.8	89	former	never	no	132	74	no	0	5.551	20	19	79.56	356.9	0.463	4.55	1.84	2.508	261753.671	115.8238697	5.555555556	3.18	<30	65438.41775	<60	25-30	>=90	>=1.8
1121	6534	2011-2012	68694	2	90	57	Male	Non-Hispanic Black	5	More than high school	30.5	102.6	moderate	former	yes	123	73	preDM	0	6.439	26	29	87.52	392.6	0.835	5.04	1.11	3.543	45192.453	97.33096119	3.803921569	1.19	<30	11298.11325	<60	>=30	>=90	>=1.8
1122	6542	2011-2012	68702	1	96	56	Male	Non-Hispanic Black	2.24	High school or equivalent	23.3	88.8	moderate	former	no	112	68	no	0	5.273	12	19	83.1	303.3	0.937	4.89	1.47	2.974	69449.023	104.3549704	4.716981132	-0.1	<30	17362.25575	<60	<25	>=90	>=1.8
1123	6543	2011-2012	68703	1	103	63	Male	Mexican American	5	More than high school	28.2	105.2	mild	now	yes	126	64	preDM	1	6.273	21	21	76.91	243.9	0.96	5.77	1.29	4.034	19469.059	91.84870267	38.35294118	-0.02	>=30	4867.26475	>=60	25-30	>=90	>=1.8
1124	6546	2011-2012	68706	1	100	26	Male	Non-Hispanic Black	1.05	More than high school	23.6	76	moderate	now	no	100	64	no	0	5.273	50	46	93.7	327.1	1.287	4.65	1.5	2.56	82456.409	111.4172585	5.112474438	-3.71	<30	20614.10225	<60	<25	>=90	<1.3
1125	6547	2011-2012	68707	2	91	54	Male	Non-Hispanic White	5	More than high school	39.7	123.2	mild	former	yes	118	77	preDM	0	6.273	34	26	77.79	356.9	3.94	3.15	0.72	0.621	328328.935	97.3844968	4.919786096	4.29	<30	82082.23375	<60	>=30	>=90	>=1.8
1126	6551	2011-2012	68711	1	99	26	Male	Other Race	5	More than high school	26.7	82.6	mild	never	no	113	65	no	0	5.107	40	38	94.59	339	0.79	3.54	1.32	1.862	26685.267	95.29141595	2.75862069	10.92	<30	6671.31675	<60	25-30	>=90	>=1.8
1127	6554	2011-2012	68714	1	96	55	Female	Non-Hispanic Black	5	More than high school	21.5	75.7	never	now	no	106	64	no	0	5.162	33	22	69.84	345	0.44	5.35	2.04	3.103	50974.101	97.45612345	8.064516129	1.08	<30	12743.52525	<60	<25	>=90	>=1.8
1128	6560	2011-2012	68720	1	98	53	Female	Non-Hispanic White	1.98	High school or equivalent	24	88.4	mild	now	no	123	79	no	0	5.718	16	17	61	208.2	1.535	5.79	1.29	3.801	501258.528	99.70766977	9.375	-2.88	<30	125314.632	<60	<25	>=90	>=1.8
1129	6573	2011-2012	68733	2	102	54	Male	Mexican American	3.92	High school or equivalent	45.9	148.1	heavy	never	yes	144	57	DM	0	7.05	26	24	61.88	297.4	1.671	6.15	2.02	3.362	85195.608	106.9884531	11.49171271	3.14	<30	21298.902	<60	>=30	>=90	>=1.8
1130	6578	2011-2012	68738	1	98	22	Male	Non-Hispanic White	1.78	High school or equivalent	22.9	86.8	heavy	never	no	104	73	no	0	4.94	14	18	91.05	333.1	0.892	4.27	1.58	2.276	309441.769	102.6269846	4.05982906	2.83	<30	77360.44225	<60	<25	>=90	1.3-1.8
1131	6584	2011-2012	68744	1	94	33	Male	Non-Hispanic White	1.04	High school or equivalent	37.6	127.9	mild	former	no	126	81	no	0	5.495	79	45	81.33	463.9	1.344	4.37	1.16	2.586	47858.634	108.8940182	7.016574586	0.17	<30	11964.6585	<60	>=30	>=90	<1.3
1132	6588	2011-2012	68748	2	102	70	Male	Other Race	1.68	More than high school	26.7	99	mild	never	yes	131	68	DM	0	6.273	16	23	92.82	327.1	1.513	4.34	1.16	2.483	47644.028	71.56947619	18.6407767	-3.57	<30	11911.007	>=60	25-30	60-90	1.3-1.8
1133	6589	2011-2012	68749	2	99	21	Female	Non-Hispanic Black	0.42	High school or equivalent	37.6	106	heavy	now	no	101	55	no	0	4.718	15	15	54.81	273.6	0.429	4.03	1.14	2.689	34591.547	149.0674066	23.56589147	-2.31	<30	8647.88675	<60	>=30	>=90	<1.3
1134	6591	2011-2012	68751	2	95	39	Male	Non-Hispanic White	5	More than high school	32.1	116	mild	former	no	113	80	preDM	0	6.717	40	26	75.14	416.4	1.626	4.6	1.06	2.793	185964.122	109.7595447	6.265060241	-3.55	<30	46491.0305	<60	>=30	>=90	>=1.8
1135	6592	2011-2012	68752	2	98	45	Male	Mexican American	2.26	Less than high school	30.3	105.1	mild	now	no	103	59	no	0	5.995	35	32	90.17	392.6	1.287	3.85	0.93	2.327	108290.472	88.35210095	27.50929368	-3.22	<30	27072.618	<60	>=30	60-90	>=1.8
1136	6600	2011-2012	68760	2	91	24	Male	Non-Hispanic White	0.31	More than high school	22.3	84.5	heavy	now	no	123	53	no	0	4.774	11	15	80.44	267.7	2.631	3.49	1.5	0.776	90635.834	117.5436648	3.717472119	5.26	<30	22658.9585	<60	<25	>=90	<1.3
1137	6605	2011-2012	68765	2	99	25	Male	Mexican American	0.27	More than high school	20.1	81	mild	never	no	106	67	no	0	5.44	32	22	71.6	285.5	0.339	3.18	1.01	2.017	79298.141	123.5255094	8.666666667	0.64	<30	19824.53525	<60	<25	>=90	<1.3
1138	6609	2011-2012	68769	3	91	56	Female	Other Race	5	More than high school	23	80.5	former	never	no	122	73	preDM	0	5.551	22	37	53.92	226	1.14	5.95	1.22	4.215	42618.051	101.6679689	8.148148148	0.72	<30	10654.51275	<60	<25	>=90	>=1.8
1139	6611	2011-2012	68771	1	98	24	Female	Other Race	5	More than high school	24.9	83.4	mild	former	yes	116	78	no	0	5.162	22	20	68.95	255.8	0.689	5.22	1.19	3.724	65753.566	106.73961	8.571428571	-0.93	<30	16438.3915	<60	<25	>=90	>=1.8
1140	6620	2011-2012	68780	1	100	78	Male	Other Race	4.63	More than high school	27.5	94.6	former	former	yes	169	72	no	1	5.94	20	20	83.98	279.6	0.677	4.5	1.71	2.483	31239.067	76.36104277	34.83870968	-2.25	>=30	7809.76675	>=60	25-30	60-90	>=1.8
1141	6621	2011-2012	68781	1	93	34	Male	Other Race	2.3	More than high school	21.6	78.1	heavy	now	no	97	52	no	0	5.995	23	21	103.43	392.6	0.61	4.99	1.63	3.077	30213.086	80.86043038	2.68	1.16	<30	7553.2715	<60	<25	60-90	>=1.8
1142	6627	2011-2012	68787	1	100	65	Male	Non-Hispanic White	1.31	More than high school	27.5	106.4	mild	former	no	105	43	DM	0	6.994	29	18	86.63	356.9	1.614	3.96	1.27	1.94	316341.36	80.57626516	5.769230769	3.82	<30	79085.34	>=60	25-30	60-90	1.3-1.8
1143	6634	2011-2012	68794	1	101	74	Male	Non-Hispanic White	4.96	More than high school	39.4	133.6	never	former	yes	176	83	DM	1	6.495	16	18	85.75	362.8	3.568	4.01	0.91	1.474	179761.883	76.58358077	51.13821138	2.74	>=30	44940.47075	>=60	>=30	60-90	>=1.8
1144	6648	2011-2012	68808	2	99	58	Male	Non-Hispanic Black	0.4	More than high school	24.5	93.4	mild	now	no	122	74	no	0	5.051	59	46	93.7	469.9	3.839	4.99	1.27	1.965	60338.307	88.98737993	2.508038585	-2.15	<30	15084.57675	<60	<25	60-90	<1.3
1145	6667	2011-2012	68827	1	96	43	Male	Other Race	4.1	More than high school	24.6	90.3	heavy	former	no	123	77	no	0	5.995	22	22	68.95	440.2	1.423	4.42	1.42	2.353	46575.704	110.5553051	5.471698113	-0.17	<30	11643.926	<60	<25	>=90	>=1.8
1146	6677	2011-2012	68837	1	99	35	Female	Non-Hispanic Black	2.07	More than high school	21.1	76.7	mild	never	no	96	78	no	0	4.774	21	29	70.72	190.3	0.294	3.41	1.5	1.784	62091.308	110.4636836	9.019607843	-0.05	<30	15522.827	<60	<25	>=90	>=1.8
1147	6680	2011-2012	68840	2	95	31	Male	Non-Hispanic Black	2.58	More than high school	26.5	91	heavy	now	no	117	68	no	0	4.94	15	18	98.12	285.5	1.084	3.47	1.37	1.603	68859.712	101.7414728	10.69518717	6.13	<30	17214.928	<60	25-30	>=90	>=1.8
1148	6685	2011-2012	68845	1	95	75	Female	Non-Hispanic White	1.1	High school or equivalent	37.2	113.8	former	never	yes	140	68	preDM	0	5.495	22	21	56.58	261.7	1.739	6.57	1.29	4.474	73996.929	87.57097256	6.524822695	-0.23	<30	18499.23225	>=60	>=30	60-90	<1.3
1149	6687	2011-2012	68847	2	102	21	Male	Mexican American	3.24	More than high school	35	116.7	mild	never	no	106	49	no	0	5.551	17	22	70.72	440.2	1.953	5.07	0.96	3.207	122596.362	127.6959189	2.75862069	-0.84	<30	30649.0905	<60	>=30	>=90	>=1.8
1150	6693	2011-2012	68853	2	91	37	Female	Non-Hispanic White	0.26	More than high school	44	124.5	never	now	yes	128	95	preDM	0	6.217	15	15	68.95	291.5	1.784	4.84	1.34	2.664	58959.134	97.4239743	13.05263158	-3.1	<30	14739.7835	<60	>=30	>=90	<1.3
1151	6695	2011-2012	68855	1	95	70	Male	Non-Hispanic White	1.94	More than high school	26.6	101.5	moderate	former	no	95	62	no	0	5.44	19	26	68.95	237.9	1.253	5.28	1.37	3.336	150223.345	91.45538809	2.833333333	-0.61	<30	37555.83625	>=60	25-30	>=90	>=1.8
1152	6699	2011-2012	68859	1	94	39	Female	Non-Hispanic White	2.96	More than high school	27.9	98	heavy	never	no	108	54	no	0	5.107	17	24	63.65	315.2	0.847	4.37	2.09	1.888	168708.237	105.8258403	5.064935065	0.35	<30	42177.05925	<60	25-30	>=90	>=1.8
1153	6700	2011-2012	68860	1	95	34	Male	Non-Hispanic White	1.66	Less than high school	23.5	86	heavy	now	yes	129	48	preDM	0	3.886	32	51	86.63	315.2	1.885	5.56	1.76	2.948	55666.207	100.1798622	10.44776119	-2.16	<30	13916.55175	<60	<25	>=90	1.3-1.8
1154	6704	2011-2012	68864	2	91	57	Female	Other Race	0.66	Less than high school	41.1	112.3	mild	former	yes	134	66	DM	0	7.383	17	15	70.72	350.9	2.032	7.09	1.71	4.448	81327.617	82.10269112	11.29251701	-3.1	<30	20331.90425	<60	>=30	60-90	<1.3
1155	6708	2011-2012	68868	2	95	80	Female	Non-Hispanic White	4.3	More than high school	16.9	72	mild	former	no	122	52	no	1	5.884	15	25	60.11	309.3	2.055	5.72	1.84	2.948	103660.937	82.87894128	93.57142857	0.45	>=30	25915.23425	>=60	<25	60-90	>=1.8
1156	6713	2011-2012	68873	1	99	24	Female	Other Race	0.66	More than high school	47.5	147.6	mild	never	no	102	74	DM	0	7.105	18	21	61	410.4	3.014	5.48	0.88	3.233	34658.852	122.2363463	18.7027027	6.53	<30	8664.713	<60	>=30	>=90	<1.3
1157	6714	2011-2012	68874	2	91	55	Male	Other Race	4.63	High school or equivalent	27.7	100.6	former	former	yes	138	87	preDM	0	6.384	32	18	82.21	440.2	2.269	5.46	1.03	3.388	69536.43	92.08970654	7.227722772	3.62	<30	17384.1075	<60	25-30	>=90	>=1.8
1158	6724	2011-2012	68884	2	101	54	Female	Non-Hispanic Black	0.65	High school or equivalent	34.5	115.6	never	never	yes	129	74	DM	0	6.328	21	26	85.75	380.7	1.456	6.23	1.81	3.75	57729.287	76.57447192	22.09302326	-3.55	<30	14432.32175	<60	>=30	60-90	<1.3
1159	6732	2011-2012	68892	1	96	75	Male	Non-Hispanic White	3.04	High school or equivalent	40.9	137.8	heavy	never	yes	123	44	preDM	1	6.162	16	23	122.88	327.1	2.281	3.85	0.96	1.862	20205.012	49.22515023	3.666666667	3.98	<30	5051.253	>=60	>=30	<60	>=1.8
1160	6739	2011-2012	68899	2	100	48	Male	Non-Hispanic Black	5	High school or equivalent	28.6	104.7	heavy	now	no	117	74	no	0	5.162	31	21	88.4	392.6	1.637	6.15	1.09	4.319	69458.164	102.4308381	23.78378378	-0.06	<30	17364.541	<60	25-30	>=90	>=1.8
1161	6748	2011-2012	68908	2	100	59	Female	Non-Hispanic Black	2.46	High school or equivalent	32.8	101.1	heavy	now	yes	129	40	no	0	5.273	40	42	80.44	291.5	0.565	5.2	2.17	2.767	38234.899	79.86495225	4.532374101	-2.01	<30	9558.72475	<60	>=30	60-90	>=1.8
1162	6752	2011-2012	68912	3	91	80	Female	Other Race	2.5	Less than high school	17.6	76.9	former	never	yes	141	61	DM	0	6.384	18	30	74.26	350.9	1.355	4.06	1.14	2.302	21241.853	65.8524967	10.92307692	2.08	<30	5310.46325	>=60	<25	60-90	>=1.8
1163	6757	2011-2012	68917	1	91	33	Male	Non-Hispanic White	2.44	More than high school	35.7	117.8	moderate	never	no	123	85	no	0	5.218	32	25	76.91	404.5	1.535	3.41	0.8	1.914	140802.065	113.3954351	15.38461538	5.36	<30	35200.51625	<60	>=30	>=90	>=1.8
1164	6759	2011-2012	68919	1	98	37	Female	Non-Hispanic White	1.66	More than high school	27	90.7	never	never	no	NA	NA	no	0	4.718	26	27	76.02	237.9	0.587	4.73	1.66	2.819	154658.499	86.57641318	13.80952381	-1.7	<30	38664.62475	<60	25-30	60-90	1.3-1.8
1165	6762	2011-2012	68922	1	101	74	Female	Non-Hispanic White	4.96	High school or equivalent	35.1	108.2	never	never	yes	121	68	preDM	1	6.828	19	25	124.64	511.5	1.931	6	1.27	3.853	204961.046	36.72184591	27	-0.82	<30	51240.2615	>=60	>=30	<60	>=1.8
1166	6773	2011-2012	68933	2	100	72	Male	Non-Hispanic Black	5	More than high school	28.3	93.8	mild	former	yes	120	58	no	0	5.607	16	23	90.17	422.3	0.745	3.88	1.32	2.224	22644.957	84.49190116	5.472636816	-4.15	<30	5661.23925	>=60	25-30	60-90	>=1.8
1167	6775	2011-2012	68935	1	100	46	Male	Mexican American	1.43	High school or equivalent	25.8	80.6	former	now	no	111	68	preDM	0	6.273	42	38	57.46	309.3	2.405	5.4	1.06	3.233	60719.481	116.6731237	5.731707317	-0.82	<30	15179.87025	<60	25-30	>=90	1.3-1.8
1168	6777	2011-2012	68937	2	95	31	Male	Non-Hispanic Black	3.67	High school or equivalent	24.2	77.5	never	never	no	134	79	no	0	5.884	10	20	87.52	392.6	0.734	3.98	1.53	2.121	89839.531	116.8343513	7.923497268	6.32	<30	22459.88275	<60	<25	>=90	>=1.8
1169	6786	2011-2012	68946	2	91	64	Female	Non-Hispanic White	4.2	High school or equivalent	24.3	80.3	mild	never	yes	NA	NA	no	0	5.551	11	17	63.65	226	1.027	6.26	1.76	4.034	208476.902	88.78159397	9.193548387	-1.67	<30	52119.2255	>=60	<25	60-90	>=1.8
1170	6788	2011-2012	68948	2	101	36	Female	Non-Hispanic White	1.88	More than high school	26.8	93.8	mild	now	no	104	66	no	0	5.051	19	19	67.18	243.9	1.468	5.69	1.91	3.103	174595.036	101.2407457	5.416666667	-3.42	<30	43648.759	<60	25-30	>=90	>=1.8
1171	6792	2011-2012	68952	2	91	80	Female	Non-Hispanic White	2.51	More than high school	23.2	86.8	mild	never	yes	161	69	preDM	1	5.662	16	21	90.17	493.7	1.027	6.93	2.53	3.931	156153.363	52.07488199	22.11267606	-4.37	<30	39038.34075	>=60	<25	<60	>=1.8
1172	6801	2011-2012	68961	2	95	64	Female	Non-Hispanic White	5	More than high school	24.2	88.4	heavy	former	yes	123	70	no	0	4.607	18	25	65.42	303.3	0.734	6.03	2.46	3.233	234873.095	85.88884786	8.833333333	5.64	<30	58718.27375	>=60	<25	60-90	>=1.8
1173	6804	2011-2012	68964	2	99	20	Male	Non-Hispanic Black	2.95	High school or equivalent	35.5	119.9	heavy	never	yes	127	67	no	0	5.384	25	20	91.05	541.3	0.655	5.33	1.34	3.672	58242.523	120.3182658	11.17263844	9.35	<30	14560.63075	<60	>=30	>=90	>=1.8
1174	6806	2011-2012	68966	2	97	63	Female	Non-Hispanic Black	0	More than high school	29.5	102.1	never	former	yes	184	85	DM	1	6.661	15	26	105.2	392.6	1.863	4.94	1.19	2.896	40928.438	56.14330791	26.22857143	-1.39	<30	10232.1095	>=60	25-30	<60	<1.3
1175	6812	2011-2012	68972	1	90	60	Female	Other Race	2.07	Less than high school	28.9	106	former	never	yes	141	90	preDM	0	6.273	21	25	87.52	261.7	2.281	5.69	1.14	3.517	34010.425	62.13237889	5.942028986	-0.42	<30	8502.60625	>=60	25-30	60-90	>=1.8
1176	6818	2011-2012	68978	2	102	39	Male	Non-Hispanic White	5	More than high school	36.1	112.2	mild	never	no	100	68	no	0	5.607	23	17	83.98	339	1.547	4.47	1.06	2.715	260096.192	100.4271548	3.043478261	-2.42	<30	65024.048	<60	>=30	>=90	>=1.8
1177	6819	2011-2012	68979	1	98	36	Female	Non-Hispanic White	4.12	More than high school	24.3	89	former	never	no	116	77	no	0	5.218	35	25	66.3	196.3	0.881	4.4	1.47	2.508	161988.856	102.8750125	6.49122807	5.84	<30	40497.214	<60	<25	>=90	>=1.8
1178	6821	2011-2012	68981	2	99	80	Female	Non-Hispanic White	5	More than high school	24.7	90.1	former	former	yes	130	65	preDM	0	6.217	15	24	77.79	243.9	0.565	4.89	1.97	2.664	111118.639	62.25100274	5.384615385	1.48	<30	27779.65975	>=60	<25	60-90	>=1.8
1179	6823	2011-2012	68983	1	102	67	Male	Other Race	2.75	More than high school	24.7	100	mild	former	no	117	75	no	0	5.384	15	25	63.65	345	1.106	6.41	1.5	4.396	20518.308	96.52699298	6.901408451	-3.3	<30	5129.577	>=60	<25	>=90	>=1.8
1180	6833	2011-2012	68993	1	92	34	Female	Other Race	0.24	High school or equivalent	26	92.7	never	never	no	101	68	no	0	4.885	47	37	43.32	160.6	0.914	5.56	1.53	3.62	43949.499	127.5262784	15.40540541	-2.29	<30	10987.37475	<60	25-30	>=90	<1.3
1181	6845	2011-2012	69005	1	96	77	Female	Non-Hispanic White	5	More than high school	31.1	104	mild	former	no	104	52	no	0	5.107	13	15	45.97	249.8	0.666	5.35	2.04	3	134372.145	92.45422902	7.727272727	1.76	<30	33593.03625	>=60	>=30	>=90	>=1.8
1182	6847	2011-2012	69007	2	93	55	Male	Other Race	0.43	Less than high school	48.4	151	former	now	yes	156	77	DM	1	7.327	17	19	70.72	380.7	2.427	3.96	0.54	2.302	56121.403	100.5660672	352.9411765	-1.13	>=30	14030.35075	<60	>=30	>=90	<1.3
1183	6851	2011-2012	69011	1	94	59	Female	Non-Hispanic White	5	More than high school	31.4	98.8	mild	never	yes	126	73	no	0	5.107	17	19	60.11	345	0.677	6.72	1.4	5.017	366029.445	96.05278825	9.433962264	0.54	<30	91507.36125	<60	>=30	>=90	>=1.8
1184	6854	2011-2012	69014	1	91	78	Male	Non-Hispanic White	4.3	More than high school	36.2	130	mild	former	yes	118	51	DM	1	9.159	30	24	108.73	481.8	3.443	3.52	0.75	1.19	126332.599	55.87845755	20.75	-3.67	<30	31583.14975	>=60	>=30	<60	>=1.8
1185	6858	2011-2012	69018	2	97	39	Male	Non-Hispanic Black	0.21	Less than high school	19.4	74.8	mild	former	yes	122	67	preDM	0	5.995	80	145	76.02	309.3	0.395	3.7	2.3	1.215	66938.634	126.276665	8.651685393	-2.55	<30	16734.6585	<60	<25	>=90	<1.3
1186	6862	2011-2012	69022	2	102	48	Female	Non-Hispanic White	1.16	More than high school	35.2	99.8	mild	never	yes	108	68	DM	0	5.162	37	30	73.37	404.5	1.445	4.78	0.96	3.155	85533.888	83.65358096	4.285714286	0.43	<30	21383.472	<60	>=30	60-90	<1.3
1187	6865	2011-2012	69025	2	96	60	Male	Mexican American	0.68	Less than high school	32.2	108.1	never	never	no	135	80	preDM	0	6.384	28	24	85.75	428.3	1.513	3.39	1.01	1.681	25864.321	84.49795328	6.276595745	-2.8	<30	6466.08025	>=60	>=30	60-90	<1.3
1188	6867	2011-2012	69027	2	91	37	Male	Non-Hispanic White	4.2	High school or equivalent	28.4	99	mild	never	yes	129	95	no	0	4.274	21	25	98.12	440.2	1.061	6.78	1.47	4.81	225210.683	84.37718252	4.63878327	-3.02	<30	56302.67075	<60	25-30	60-90	>=1.8
1189	6871	2011-2012	69031	2	101	22	Male	Other Race	2.3	High school or equivalent	19.8	74.5	moderate	now	no	118	62	no	0	4.885	12	19	85.75	410.4	0.982	5.87	1.45	3.982	36510.049	110.3506122	3.38028169	-2.05	<30	9127.51225	<60	<25	>=90	>=1.8
1190	6874	2011-2012	69034	2	93	33	Male	Other Race	0.56	Less than high school	27.8	93.8	mild	never	no	113	72	no	0	5.551	20	19	76.02	374.7	4.324	7.11	1.01	4.112	75107.987	113.9355153	2.962962963	-3.64	<30	18776.99675	<60	25-30	>=90	<1.3
1191	6877	2011-2012	69037	2	102	41	Male	Mexican American	5	Less than high school	27.7	93.2	heavy	never	yes	118	64	no	0	5.051	16	15	58.34	345	1.569	5.46	1.19	3.543	78948.541	120.0879455	5.454545455	1.25	<30	19737.13525	<60	25-30	>=90	>=1.8
1192	6887	2011-2012	69047	1	99	61	Female	Non-Hispanic White	5	More than high school	33.8	115.3	heavy	never	yes	115	83	DM	0	5.551	24	23	78.68	404.5	1.75	5.35	1.42	3.129	220987.065	70.17423108	13.07189542	2.7	<30	55246.76625	>=60	>=30	60-90	>=1.8
1193	6894	2011-2012	69054	2	95	43	Male	Non-Hispanic White	1.05	High school or equivalent	32.1	120.6	heavy	now	no	117	74	no	0	6.106	98	54	79.56	285.5	1.276	4.11	0.93	2.586	43777.13	104.2405749	4.465116279	-1.17	<30	10944.2825	<60	>=30	>=90	<1.3
1194	6895	2011-2012	69055	2	96	28	Female	Other Race	2.38	More than high school	19.6	74.1	heavy	never	no	104	64	no	0	4.996	17	21	66.3	220.1	2.439	5.22	1.6	2.508	127168.444	108.8218019	7.368421053	-0.3	<30	31792.111	<60	<25	>=90	>=1.8
1195	6906	2011-2012	69066	1	94	74	Male	Non-Hispanic White	3.97	More than high school	22.6	81.3	mild	former	no	128	67	preDM	0	5.662	22	32	88.4	350.9	0.598	5.09	1.6	3.207	131814.08	73.81467216	8.396946565	4.27	<30	32953.52	>=60	<25	60-90	>=1.8
1196	6921	2011-2012	69081	2	95	23	Female	Non-Hispanic Black	3.85	More than high school	20.2	66.3	moderate	never	no	117	83	no	0	4.274	11	17	66.3	273.6	0.531	4.14	1.73	2.172	42592.26	129.9317436	2.535211268	-0.19	<30	10648.065	<60	<25	>=90	>=1.8
1197	6926	2011-2012	69086	2	98	25	Female	Non-Hispanic White	4.42	More than high school	28.7	96.2	moderate	never	no	112	72	no	0	5.384	19	24	77.79	255.8	1.276	4.14	1.53	2.017	230933.264	91.60890335	3.105590062	2.93	<30	57733.316	<60	25-30	>=90	>=1.8
1198	6937	2011-2012	69097	1	98	31	Male	Other Race	0.4	Less than high school	28.7	95.6	mild	never	no	112	76	no	0	5.551	24	19	84.86	356.9	0.971	6.15	1.5	4.215	80118.042	104.896039	5.12987013	0.79	<30	20029.5105	<60	25-30	>=90	<1.3
1199	6941	2011-2012	69101	1	93	58	Male	Other Race	2.94	Less than high school	27	99.9	mild	now	no	126	57	no	0	5.44	15	19	66.3	279.6	0.824	5.59	1.29	3.905	47766.798	101.1157989	3.157894737	-2.02	<30	11941.6995	<60	25-30	>=90	>=1.8
1200	6945	2011-2012	69105	2	102	55	Male	Other Race	1.08	Less than high school	26.5	91.9	mild	never	no	116	79	no	0	4.829	28	22	72.49	297.4	1.682	4.99	1.09	3.129	74567.226	99.55061743	5.25	2.29	<30	18641.8065	<60	25-30	>=90	<1.3
1201	6980	2011-2012	69140	1	92	80	Male	Non-Hispanic White	2.64	High school or equivalent	28.7	112.5	former	former	yes	150	44	preDM	1	5.829	27	26	95.47	273.6	2.382	5.48	1.24	3.155	127765.574	64.48056969	158.3333333	-1.66	>=30	31941.3935	>=60	25-30	60-90	>=1.8
1202	6981	2011-2012	69141	1	96	80	Male	Non-Hispanic Black	1.82	Less than high school	28.3	108.4	former	former	no	134	43	DM	1	7.882	21	24	112.27	309.3	0.937	4.24	1.81	1.991	21153.18	61.27847931	99.14529915	0.8	>=30	5288.295	>=60	25-30	60-90	>=1.8
1203	6991	2011-2012	69151	1	93	57	Male	Non-Hispanic White	4.59	More than high school	26.3	95.6	mild	former	no	105	68	preDM	0	6.439	35	34	105.2	285.5	0.835	4.24	1.63	2.224	242685.773	67.401443	3.700787402	0.66	<30	60671.44325	<60	25-30	60-90	>=1.8
1204	6992	2011-2012	69152	2	97	21	Male	Non-Hispanic Black	0.82	High school or equivalent	22	73.9	heavy	now	yes	100	68	no	0	5.662	29	32	91.94	255.8	1.174	3.36	1.24	1.577	70013.898	118.0885281	2.276785714	1.99	<30	17503.4745	<60	<25	>=90	<1.3
1205	6999	2011-2012	69159	2	93	22	Female	Other Race	0.98	More than high school	27	88.7	moderate	former	no	109	62	no	0	5.44	15	15	61.88	261.7	0.644	5.15	1.55	3.31	89194.339	123.3803389	13.79084967	1.47	<30	22298.58475	<60	25-30	>=90	<1.3
1206	7001	2011-2012	69161	1	102	20	Male	Non-Hispanic White	0.49	Less than high school	19.4	75.8	mild	now	no	123	80	no	0	4.607	14	15	68.95	422.3	1.298	4.14	1.19	2.353	57975.961	129.9411997	11.98019802	-1.57	<30	14493.99025	<60	<25	>=90	<1.3
1207	7004	2011-2012	69164	1	98	80	Female	Non-Hispanic White	3.8	More than high school	26.1	99.8	mild	former	yes	141	66	no	1	4.829	15	17	81.33	202.2	0.565	4.94	1.97	2.715	137124.374	58.99380643	11.55555556	2.92	<30	34281.0935	>=60	25-30	<60	>=1.8
1208	7008	2011-2012	69168	1	97	75	Male	Non-Hispanic Black	5	Less than high school	22	91.9	mild	never	yes	131	73	DM	1	5.551	15	32	197.13	511.5	0.914	6.57	2.35	3.801	26268.057	32.13363498	65.56016598	-3.26	>=30	6567.01425	>=60	<25	<60	>=1.8
1209	7011	2011-2012	69171	2	93	40	Female	Other Race	2.31	More than high school	26.8	89.3	mild	never	no	118	74	no	0	5.384	20	18	45.08	237.9	1.716	5.02	1.37	2.87	68215.775	120.6643837	6.09375	4.37	<30	17053.94375	<60	25-30	>=90	>=1.8
1210	7016	2011-2012	69176	2	102	57	Female	Non-Hispanic Black	1.84	High school or equivalent	31.4	111	heavy	never	yes	137	93	no	0	5.551	18	18	69.84	220.1	0.621	4.42	1.32	2.819	57701.609	96.09651307	4.166666667	-0.88	<30	14425.40225	<60	>=30	>=90	>=1.8
1211	7017	2011-2012	69177	1	91	66	Male	Non-Hispanic White	3.4	More than high school	30.7	108.2	mild	former	yes	107	74	no	0	4.108	27	25	74.26	345	1.761	4.63	1.03	2.793	264264.337	91.23981545	2.831325301	4.76	<30	66066.08425	>=60	>=30	>=90	>=1.8
1212	7024	2011-2012	69184	1	92	56	Male	Non-Hispanic White	1.16	Less than high school	31.2	109.5	mild	never	no	105	66	no	0	5.773	17	21	87.52	404.5	2.123	5.79	0.93	3.879	68760.161	84.78778152	3.529411765	4.12	<30	17190.04025	<60	>=30	60-90	<1.3
1213	7040	2011-2012	69200	2	102	34	Male	Other Race	3.92	More than high school	26.1	95.5	moderate	never	yes	145	86	preDM	0	5.995	47	36	75.14	463.9	1.818	5.48	1.42	3.233	50118.32	113.6831384	5.373134328	6.2	<30	12529.58	<60	25-30	>=90	>=1.8
1214	7041	2011-2012	69201	2	94	44	Female	Other Race	5	More than high school	31.3	97.4	mild	never	no	127	88	preDM	0	6.217	20	17	61.88	315.2	3.669	5.17	1.03	2.457	57833.301	105.7132503	8.016528926	0.19	<30	14458.32525	<60	>=30	>=90	>=1.8
1215	7043	2011-2012	69203	2	95	66	Female	Non-Hispanic Black	4.92	More than high school	33.3	103	mild	never	yes	135	42	DM	0	7.383	24	26	73.37	362.8	0.926	5.59	1.58	3.595	31433.714	84.97997626	7.647058824	3.05	<30	7858.4285	>=60	>=30	60-90	>=1.8
1216	7067	2011-2012	69227	1	100	62	Female	Non-Hispanic Black	5	More than high school	25.2	86.2	moderate	never	no	136	83	no	0	5.329	13	19	56.58	303.3	0.937	4.76	1.73	2.586	54051.693	110.6026515	4.666666667	6.02	<30	13512.92325	>=60	25-30	>=90	>=1.8
1217	7069	2011-2012	69229	2	95	43	Male	Non-Hispanic White	2.17	More than high school	35.5	111.3	former	never	no	125	85	no	0	5.718	54	38	85.75	475.8	2.518	3.44	0.91	1.371	193937.612	95.21578782	3.673469388	-3.22	<30	48484.403	<60	>=30	>=90	>=1.8
1218	7076	2011-2012	69236	2	97	33	Male	Non-Hispanic White	1.35	More than high school	31.9	105.1	moderate	now	yes	131	77	no	0	5.107	38	28	83.1	321.2	2.235	5.28	0.83	3.414	42966.329	106.0991567	3.93258427	4.5	<30	10741.58225	<60	>=30	>=90	1.3-1.8
1219	7077	2011-2012	69237	1	97	49	Female	Other Race	5	More than high school	33.3	95.7	never	never	no	120	88	no	0	4.94	36	24	53.92	160.6	1.569	4.97	1.32	2.922	110563.107	106.7921691	3.80952381	0.85	<30	27640.77675	<60	>=30	>=90	>=1.8
1220	7083	2011-2012	69243	1	93	45	Female	Non-Hispanic White	4.59	More than high school	22.5	81	mild	never	no	116	69	no	0	4.163	15	23	63.65	237.9	0.689	3.96	1.5	2.146	245988.462	101.4582148	4.150943396	10.66	<30	61497.1155	<60	<25	>=90	>=1.8
1221	7096	2011-2012	69256	1	101	56	Male	Other Race	0.88	Less than high school	40	126	former	former	no	123	81	preDM	0	5.107	23	22	89.28	380.7	1.908	7.11	1.24	4.991	68760.161	82.76213421	7.150837989	-3.73	<30	17190.04025	<60	>=30	60-90	<1.3
1222	7099	2011-2012	69259	2	96	30	Male	Other Race	2.75	More than high school	22.6	84.2	heavy	now	no	117	84	no	0	6.106	22	27	101.66	469.9	1.931	5.69	1.84	2.974	220617.709	84.91649743	1.470588235	3.26	<30	55154.42725	<60	<25	60-90	>=1.8
1223	7106	2011-2012	69266	2	93	27	Male	Non-Hispanic Black	0.56	Less than high school	27.4	96.9	mild	never	no	121	73	preDM	0	5.718	26	30	99.89	404.5	1.468	5.87	1.09	4.112	59252.844	102.4058271	2.972222222	0.85	<30	14813.211	<60	25-30	>=90	<1.3
1224	7114	2011-2012	69274	1	90	21	Female	Non-Hispanic Black	0.58	More than high school	26.1	89	mild	never	no	105	76	no	0	5.329	13	17	60.11	267.7	1.253	5.97	1.97	3.439	42928.28	144.6052729	3.801169591	-1.42	<30	10732.07	<60	25-30	>=90	<1.3
1225	7117	2011-2012	69277	3	91	24	Male	Other Race	2.94	More than high school	24.8	89.6	heavy	now	no	112	68	no	0	5.329	23	25	81.33	434.2	2.89	3.78	1.11	1.345	30850.682	116.0007473	5.205479452	-3.42	<30	7712.6705	<60	<25	>=90	>=1.8
1226	7118	2011-2012	69278	2	93	78	Female	Non-Hispanic Black	2.28	More than high school	28.4	94.2	never	former	no	120	73	no	0	5.718	10	18	82.21	333.1	0.756	6.03	1.42	4.267	48382.65	68.07334887	3.276836158	-3.62	<30	12095.6625	>=60	25-30	60-90	>=1.8
1227	7119	2011-2012	69279	2	95	58	Female	Non-Hispanic White	5	More than high school	27.7	105.8	moderate	former	yes	132	73	preDM	0	6.384	17	20	75.14	362.8	0.756	4.84	1.66	2.845	291131.48	75.76610369	9.21875	-0.3	<30	72782.87	<60	25-30	60-90	>=1.8
1228	7124	2011-2012	69284	2	92	53	Male	Other Race	0.92	More than high school	28.4	98.4	former	former	no	117	69	DM	0	7.161	25	24	79.56	350.9	0.948	3.75	0.91	2.405	51958.015	97.16934672	4	7.22	<30	12989.50375	<60	25-30	>=90	<1.3
1229	7126	2011-2012	69286	1	93	39	Male	Other Race	5	More than high school	25.9	98	moderate	now	yes	120	79	preDM	0	5.884	17	18	74.26	285.5	1.705	5.72	1.24	3.698	54248.663	110.2947114	4.72972973	3.83	<30	13562.16575	<60	25-30	>=90	>=1.8
1230	7128	2011-2012	69288	2	100	69	Female	Non-Hispanic Black	0.75	Less than high school	22.6	90.3	heavy	never	yes	158	72	DM	1	5.607	28	35	71.6	339	1.84	5.53	1.89	2.793	41773.952	85.69813619	36.492891	3.11	>=30	10443.488	>=60	<25	60-90	<1.3
1231	7141	2011-2012	69301	2	94	64	Female	Non-Hispanic White	3.4	More than high school	26.2	97.4	former	never	yes	127	77	no	1	5.94	24	34	109.62	511.5	1.727	5.95	1.22	3.931	200373.472	46.01411874	4.301675978	-3.6	<30	50093.368	>=60	25-30	<60	>=1.8
1232	7147	2011-2012	69307	2	99	58	Male	Non-Hispanic Black	1.79	Less than high school	17.9	74	former	former	yes	151	90	preDM	0	5.662	13	19	79.56	261.7	0.768	4.84	1.78	2.689	73262.93	108.4536111	10.47619048	-4.35	<30	18315.7325	<60	<25	>=90	1.3-1.8
1233	7164	2011-2012	69324	1	91	42	Male	Non-Hispanic White	5	More than high school	25.5	102.6	heavy	now	yes	131	101	no	0	5.495	116	113	64.53	446.1	2.552	8.28	1.37	5.741	311826.088	114.4077713	20.96385542	7.96	<30	77956.522	<60	25-30	>=90	>=1.8
1234	7165	2011-2012	69325	1	97	36	Female	Other Race	5	More than high school	31.7	95.2	heavy	now	no	119	71	no	0	4.774	16	15	71.6	214.1	1.344	4.29	1.29	2.379	46807.296	93.7347403	6.959064327	0.87	<30	11701.824	<60	>=30	>=90	>=1.8
1235	7169	2011-2012	69329	1	98	50	Female	Non-Hispanic White	0.62	Less than high school	31.1	104.2	heavy	now	no	100	73	no	0	5.995	14	12	72.49	321.2	0.847	5.43	1.86	3.181	98823.365	83.70424813	4.653465347	-5.88	<30	24705.84125	<60	>=30	60-90	<1.3
1236	7176	2011-2012	69336	1	92	30	Male	Non-Hispanic White	1.24	High school or equivalent	45.8	147	moderate	now	yes	136	90	no	0	5.384	131	68	78.68	553.2	0.96	5.12	1.11	3.569	47901.086	114.733686	5.411764706	1.09	<30	11975.2715	<60	>=30	>=90	<1.3
1237	7179	2011-2012	69339	2	102	22	Male	Mexican American	1.09	Less than high school	24.6	91.3	mild	never	no	102	56	no	0	5.44	18	19	68.07	303.3	1.445	4.45	0.83	2.948	74799.008	128.8096983	10.62068966	-4.22	<30	18699.752	<60	<25	>=90	<1.3
1238	7183	2011-2012	69343	2	91	20	Male	Non-Hispanic White	5	More than high school	27.2	95.1	heavy	never	no	123	63	preDM	0	6.162	25	23	79.56	309.3	2.698	4.06	1.01	1.81	276835.659	122.5191803	4.259259259	1.49	<30	69208.91475	<60	25-30	>=90	>=1.8
1239	7187	2011-2012	69347	2	95	49	Male	Non-Hispanic White	0.9	Less than high school	30.1	110.8	former	now	yes	134	72	DM	0	6.217	21	22	87.52	410.4	3.489	4.97	0.8	2.56	40210.651	89.06119797	11.26582278	-3.06	<30	10052.66275	<60	>=30	60-90	<1.3
1240	7189	2011-2012	69349	1	96	74	Male	Non-Hispanic White	5	More than high school	25.2	104	moderate	former	yes	153	48	DM	0	6.939	46	66	86.63	166.5	1.513	3.98	1.63	1.655	149677.346	75.63979963	9.496402878	1.31	<30	37419.3365	>=60	25-30	60-90	>=1.8
1241	7191	2011-2012	69351	2	98	31	Female	Non-Hispanic White	1.94	More than high school	25.2	86.5	heavy	now	no	105	76	no	0	4.607	18	17	60.11	202.2	1.219	5.51	2.17	2.767	142906.782	116.9313647	6.078431373	-1.87	<30	35726.6955	<60	25-30	>=90	>=1.8
1242	7201	2011-2012	69361	1	98	66	Male	Non-Hispanic Black	1.57	Less than high school	31.2	106.7	mild	former	yes	125	74	preDM	0	5.607	47	36	122.88	368.8	1.445	5.04	1.06	3.31	25308.216	60.6194938	4.537815126	-1.58	<30	6327.054	>=60	>=30	60-90	1.3-1.8
1243	7219	2011-2012	69379	1	92	30	Male	Non-Hispanic White	0	High school or equivalent	25.6	92	heavy	now	no	117	67	no	0	5.107	16	18	80.44	321.2	0.711	4.4	1.14	2.922	47407.804	112.6924234	2.65060241	3.55	<30	11851.951	<60	25-30	>=90	<1.3
1244	7220	2011-2012	69380	2	98	20	Male	Other Race	0.13	High school or equivalent	32.8	102.9	heavy	never	no	123	83	no	1	5.273	72	38	68.07	333.1	1.31	4.16	1.24	2.327	89770.157	130.6321473	54.16666667	-3.15	>=30	22442.53925	<60	>=30	>=90	<1.3
1245	7226	2011-2012	69386	2	95	52	Male	Other Race	1.21	High school or equivalent	31.2	112.8	former	former	yes	141	68	no	0	5.829	15	15	77.79	255.8	0.847	4.34	1.14	2.819	40583.126	98.76233007	5.416666667	-1.79	<30	10145.7815	<60	>=30	>=90	<1.3
1246	7227	2011-2012	69387	2	100	25	Male	Non-Hispanic White	4.13	High school or equivalent	25.6	92.1	heavy	now	no	114	68	no	0	5.218	31	26	86.63	446.1	1.185	4.29	1.42	2.327	152804.606	106.717881	2.962962963	1.85	<30	38201.1515	<60	25-30	>=90	>=1.8
1247	7231	2011-2012	69391	3	92	52	Female	Mexican American	3.77	More than high school	29.8	106.9	heavy	never	no	121	77	no	0	5.44	29	25	59.23	267.7	1.027	6.75	2.02	4.267	71296.132	101.3869501	5.223880597	1.01	<30	17824.033	<60	25-30	>=90	>=1.8
1248	7233	2011-2012	69393	1	100	33	Male	Non-Hispanic Black	4.45	More than high school	29.6	93.7	mild	never	no	110	73	no	0	5.551	21	27	106.08	398.5	1.05	4.5	1.11	2.896	81328.88	91.29812788	5.376344086	0.99	<30	20332.22	<60	25-30	>=90	>=1.8
1249	7235	2011-2012	69395	2	93	25	Male	Non-Hispanic Black	1.47	More than high school	23.5	86.1	moderate	never	no	126	80	no	0	4.496	11	26	94.59	309.3	0.621	4.06	1.76	2.017	82677.338	110.9361331	5.890410959	-3.05	<30	20669.3345	<60	<25	>=90	1.3-1.8
1250	7243	2011-2012	69403	1	90	61	Male	Non-Hispanic White	2.86	More than high school	39.7	129.8	mild	former	yes	NA	NA	preDM	0	5.384	22	25	91.05	362.8	0.892	6.15	1.63	4.112	261359.275	78.03371086	3.862660944	-0.77	<30	65339.81875	>=60	>=30	60-90	>=1.8
1251	7249	2011-2012	69409	3	91	50	Female	Non-Hispanic Black	5	More than high school	22.6	82.5	moderate	never	yes	118	72	no	0	4.274	17	23	67.18	261.7	0.587	5.12	2.15	2.715	59171.352	105.7767965	6.3	5.97	<30	14792.838	<60	<25	>=90	>=1.8
1252	7250	2011-2012	69410	2	96	46	Female	Non-Hispanic Black	5	More than high school	30.3	99.9	moderate	never	yes	121	67	preDM	0	6.439	13	17	61	303.3	1.276	4.53	1.76	2.172	53357.146	120.7339538	5.957446809	1.3	<30	13339.2865	<60	>=30	>=90	>=1.8
1253	7253	2011-2012	69413	2	100	50	Female	Non-Hispanic Black	1.08	More than high school	35	110.8	heavy	now	no	106	61	no	0	5.94	28	27	67.18	309.3	0.655	5.43	1.81	3.31	36110.238	105.7767965	3.916666667	4.12	<30	9027.5595	<60	>=30	>=90	<1.3
1254	7258	2011-2012	69418	1	91	71	Male	Non-Hispanic White	5	More than high school	24.7	93	mild	never	yes	128	73	no	0	5.551	26	20	101.66	356.9	1.705	4.01	1.09	2.146	123996.783	63.6665418	9.775280899	0.9	<30	30999.19575	>=60	<25	60-90	>=1.8
1255	7262	2011-2012	69422	1	97	37	Female	Non-Hispanic Black	5	More than high school	31.4	95.3	moderate	never	yes	110	68	no	0	5.495	19	16	59.23	303.3	0.813	4.86	1.24	3.258	81975.392	129.8640454	5.677966102	3.53	<30	20493.848	<60	>=30	>=90	>=1.8
1256	7267	2011-2012	69427	1	99	44	Male	Non-Hispanic Black	0.54	More than high school	28	105	heavy	never	yes	135	79	no	0	5.162	21	26	97.24	350.9	0.497	3.98	1.11	2.638	52834.496	93.88365217	2.272727273	-0.55	<30	13208.624	<60	25-30	>=90	<1.3
1257	7268	2011-2012	69428	1	101	42	Female	Non-Hispanic White	2.71	More than high school	47	131	never	never	yes	105	71	DM	0	6.661	37	30	68.95	350.9	1.445	4.47	1.32	2.483	70213.667	94.06153995	11.15107914	-2.71	<30	17553.41675	<60	>=30	>=90	>=1.8
1258	7271	2011-2012	69431	2	100	79	Female	Non-Hispanic Black	4.35	More than high school	22.3	84.8	mild	former	yes	176	55	DM	0	6.051	24	22	75.14	273.6	1.231	4.55	1.66	2.327	32296.873	75.36240829	3.647058824	7.39	<30	8074.21825	>=60	<25	60-90	>=1.8
1259	7273	2011-2012	69433	1	102	53	Male	Mexican American	1.89	Less than high school	36.2	125.5	heavy	former	yes	142	80	DM	1	11.324	58	62	63.65	380.7	1.456	5.53	1.01	3.853	60092.982	106.5023764	245.2830189	-1.77	>=30	15023.2455	<60	>=30	>=90	>=1.8
1260	7274	2011-2012	69434	1	101	43	Female	Mexican American	0.84	More than high school	37.7	113.3	former	never	no	110	63	no	0	5.44	26	27	56.58	345	1.852	5.53	1.03	3.646	89038.741	109.6438359	5.11627907	-0.43	<30	22259.68525	<60	>=30	>=90	<1.3
1261	7286	2011-2012	69446	2	102	25	Male	Mexican American	0.59	Less than high school	30.5	107.4	moderate	former	no	107	64	preDM	0	5.273	34	22	68.95	333.1	1.456	4.73	1.19	2.87	77152.964	125.4564848	4.444444444	8.23	<30	19288.241	<60	>=30	>=90	<1.3
1262	7292	2011-2012	69452	3	91	56	Female	Non-Hispanic White	5	More than high school	38.4	110	mild	never	no	127	77	no	0	5.051	41	24	80.44	345	1.513	4.14	1.22	2.224	415444.71	70.75593836	3.13253012	-0.39	<30	103861.1775	<60	>=30	60-90	>=1.8
1263	7300	2011-2012	69460	1	90	50	Male	Other Race	2.44	Less than high school	29.4	110.5	heavy	now	no	133	75	no	0	5.551	21	19	54.81	315.2	2.1	5.28	0.93	3.388	44364.551	115.6650698	6.590909091	-1.32	<30	11091.13775	<60	25-30	>=90	>=1.8
1264	7313	2011-2012	69473	2	92	79	Male	Non-Hispanic Black	3.13	Less than high school	25.1	104.2	mild	former	yes	104	64	preDM	1	6.162	12	20	237.8	380.7	0.813	4.29	1.42	2.508	23352.42	24.90502161	420.7920792	-3.32	>=30	5838.105	>=60	25-30	<60	>=1.8
1265	7314	2011-2012	69474	2	93	66	Female	Other Race	1.74	High school or equivalent	22.4	84.3	moderate	never	yes	125	59	no	0	5.162	24	25	54.81	184.4	0.835	5.43	1.84	3.207	32825.539	94.26560997	10.39215686	2.13	<30	8206.38475	>=60	<25	>=90	1.3-1.8
1266	7326	2011-2012	69486	1	103	67	Female	Non-Hispanic Black	4.66	More than high school	42.6	122.2	mild	former	no	135	73	DM	1	4.108	21	37	119.34	446.1	0.677	3.75	1.4	2.043	27682.827	46.86598417	33.33333333	-0.42	>=30	6920.70675	>=60	>=30	<60	>=1.8
1267	7334	2011-2012	69494	1	95	37	Female	Non-Hispanic White	1.28	High school or equivalent	22	80.2	former	never	no	101	68	no	0	5.44	11	15	58.34	166.5	0.745	4.63	1.6	2.689	221763.875	113.2118759	9.323308271	-3.01	<30	55440.96875	<60	<25	>=90	<1.3
1268	7335	2011-2012	69495	2	101	22	Female	Other Race	1.1	High school or equivalent	20.1	69.9	mild	never	no	101	69	no	0	4.885	10	14	53.04	261.7	0.61	3.96	1.24	2.431	42717.696	129.7990317	8.620689655	-2.52	<30	10679.424	<60	<25	>=90	<1.3
1269	7342	2011-2012	69502	1	99	50	Female	Non-Hispanic White	4.87	More than high school	28.9	102.6	mild	never	no	121	89	no	0	5.773	30	21	67.18	202.2	1.953	8.22	1.63	5.689	304810.513	91.75818493	11.80327869	4.48	<30	76202.62825	<60	25-30	>=90	>=1.8
1270	7344	2011-2012	69504	1	93	54	Male	Other Race	4.59	More than high school	21.5	78.7	mild	never	no	119	76	no	0	5.718	16	23	83.98	362.8	1.05	4.37	1.29	2.586	30015.848	90.38365226	2.142857143	2.81	<30	7503.962	<60	<25	>=90	>=1.8
1271	7346	2011-2012	69506	1	95	80	Male	Non-Hispanic White	1.26	Less than high school	39.9	130.8	mild	former	yes	150	65	DM	1	8.327	22	20	80.44	362.8	1.885	4.06	1.06	2.146	26575.264	79.31533135	74.11764706	-3.83	>=30	6643.816	>=60	>=30	60-90	<1.3
1272	7351	2011-2012	69511	2	102	65	Female	Non-Hispanic Black	1.38	Less than high school	25.2	91	never	never	yes	164	64	DM	0	8.993	25	22	76.91	368.8	1.682	2.74	1.06	0.905	32379.396	80.84515429	7	-1.27	<30	8094.849	>=60	25-30	60-90	1.3-1.8
1273	7353	2011-2012	69513	1	99	46	Male	Non-Hispanic Black	5	More than high school	24	97.1	mild	now	no	126	75	no	0	4.94	25	20	99.89	285.5	1.095	6.83	1.19	5.146	64856.843	89.61080752	6.267029973	4.4	<30	16214.21075	<60	<25	60-90	>=1.8
1274	7354	2011-2012	69514	1	96	57	Male	Non-Hispanic Black	3.99	More than high school	27.1	100	heavy	former	no	122	80	no	0	4.663	48	26	102.54	458	1.84	5.25	1.81	2.586	58211.023	80.36080038	5.953488372	9.18	<30	14552.75575	<60	25-30	60-90	>=1.8
1275	7356	2011-2012	69516	1	99	74	Male	Non-Hispanic White	3.74	More than high school	28.4	109.9	heavy	now	yes	134	68	preDM	0	4.996	18	20	63.65	362.8	2.845	5.43	1.22	2.922	129282.409	91.89534587	23.69230769	-0.98	<30	32320.60225	>=60	25-30	>=90	>=1.8
1276	7360	2011-2012	69520	1	100	22	Male	Non-Hispanic White	4.63	More than high school	20.2	79.5	heavy	never	no	114	59	no	0	5.273	15	21	77.79	303.3	1.208	3.8	1.58	1.681	239009.281	121.9309262	10.54054054	2.73	<30	59752.32025	<60	<25	>=90	>=1.8
1277	7363	2011-2012	69523	1	99	56	Male	Non-Hispanic White	4.78	High school or equivalent	34.1	121	former	former	no	91	73	DM	0	7.494	17	18	114.04	434.2	1.502	3.39	0.91	1.784	277940.285	61.56774717	4.285714286	1.62	<30	69485.07125	<60	>=30	60-90	>=1.8
1278	7368	2011-2012	69528	2	98	80	Male	Mexican American	4.56	Less than high school	32.5	112.7	mild	former	yes	199	65	DM	1	6.55	66	38	136.14	463.9	0.813	3.36	1.11	1.888	32606.777	41.98804314	929.2682927	0.98	>=30	8151.69425	>=60	>=30	<60	>=1.8
1279	7374	2011-2012	69534	1	96	29	Female	Non-Hispanic Black	5	More than high school	31	97	heavy	never	no	111	62	no	0	5.44	14	21	69.84	362.8	0.689	4.47	1.78	2.379	46491.729	116.9845938	3.846153846	7.62	<30	11622.93225	<60	>=30	>=90	>=1.8
1280	7376	2011-2012	69536	2	95	57	Female	Non-Hispanic White	3.53	More than high school	28.6	100	mild	never	yes	143	63	no	1	5.273	41	22	93.7	422.3	2.585	7.55	1.22	5.146	266629.975	58.42495622	4.563758389	-0.41	<30	66657.49375	<60	25-30	<60	>=1.8
1281	7377	2011-2012	69537	1	97	49	Male	Non-Hispanic White	5	More than high school	29.8	110.8	moderate	never	no	124	76	no	0	5.495	19	22	85.75	362.8	0.666	4.5	1.24	2.948	326549.656	91.28605858	2.871287129	-4.15	<30	81637.414	<60	25-30	>=90	>=1.8
1282	7382	2011-2012	69542	1	95	40	Female	Non-Hispanic White	0.65	More than high school	31.9	116	mild	never	no	104	75	no	1	5.884	16	16	93.7	303.3	3.342	5.77	0.91	3.336	80370.189	65.83565659	174.8979592	-0.72	>=30	20092.54725	<60	>=30	60-90	<1.3
1283	7386	2011-2012	69546	2	96	26	Male	Other Race	2.39	More than high school	17.3	71.2	never	never	no	96	66	no	0	4.829	14	19	105.2	350.9	0.7	4.86	1.68	2.87	36983.524	83.79970526	2.545454545	-4.42	<30	9245.881	<60	<25	60-90	>=1.8
1284	7390	2011-2012	69550	1	96	58	Male	Non-Hispanic Black	2.3	More than high school	55.7	176	heavy	former	yes	129	70	DM	0	5.884	25	20	88.4	392.6	0.723	4.34	2.2	1.81	34073.239	95.48237458	2.26519337	5.89	<30	8518.30975	<60	>=30	>=90	>=1.8
1285	7400	2011-2012	69560	2	102	26	Male	Other Race	1.08	Less than high school	24.4	88.9	mild	former	no	115	69	no	0	5.384	19	15	74.26	327.1	1.84	4.71	0.88	2.974	124247.968	120.8410411	3.1875	-0.55	<30	31061.992	<60	<25	>=90	<1.3
1286	7409	2011-2012	69569	1	92	61	Female	Other Race	2.15	More than high school	21.1	72.2	former	never	no	134	62	no	0	5.107	28	33	62.76	339	1.118	5.64	1.97	3.155	37356.307	92.21866632	5.666666667	-2.37	<30	9339.07675	>=60	<25	>=90	>=1.8
1287	7414	2011-2012	69574	1	97	48	Female	Non-Hispanic White	4.96	More than high school	23.2	87.2	mild	former	yes	120	83	no	0	4.996	18	26	49.5	261.7	1.027	5.46	1.66	3.336	374824.183	110.6139278	8.292682927	3.98	<30	93706.04575	<60	<25	>=90	>=1.8
1288	7417	2011-2012	69577	2	93	52	Male	Non-Hispanic Black	1.07	High school or equivalent	33.1	111.5	heavy	never	yes	182	88	preDM	0	6.328	27	23	55.69	428.3	1.445	4.99	1.73	2.586	46682.301	130.9824868	22.77419355	2.14	<30	11670.57525	<60	>=30	>=90	<1.3
1289	7421	2011-2012	69581	2	90	23	Male	Non-Hispanic Black	5	More than high school	27.5	91.2	moderate	never	no	114	65	no	0	4.385	36	54	102.54	434.2	0.474	4.14	1.76	2.172	55337.6	102.0398484	3.918918919	-0.79	<30	13834.4	<60	25-30	>=90	>=1.8
1290	7434	2011-2012	69594	1	95	31	Male	Non-Hispanic White	1.09	More than high school	20.3	80	mild	now	no	109	70	no	0	4.94	23	28	71.6	321.2	0.745	4.81	1.24	3.233	54860.211	118.4273863	7.674418605	0.79	<30	13715.05275	<60	<25	>=90	<1.3
1291	7436	2011-2012	69596	2	99	64	Male	Non-Hispanic Black	3.67	More than high school	24.4	90.3	mild	never	yes	177	76	DM	1	6.162	19	28	114.92	285.5	0.813	5.02	1.53	3.129	23540.234	66.65936759	96.40718563	0.75	>=30	5885.0585	>=60	<25	60-90	>=1.8
1292	7439	2011-2012	69599	1	102	21	Male	Mexican American	0.67	Less than high school	30.1	97	never	never	no	120	75	no	0	5.551	15	20	72.49	297.4	0.485	3.8	1.37	2.198	86739.068	126.4065298	4.146341463	-4.18	<30	21684.767	<60	>=30	>=90	<1.3
1293	7443	2011-2012	69603	2	94	26	Male	Mexican American	0.81	Less than high school	24.2	82.6	former	never	no	85	58	no	0	5.162	31	37	92.82	303.3	0.79	3.52	1.14	2.017	75749.031	97.49018732	3.103448276	0.54	<30	18937.25775	<60	<25	>=90	<1.3
1294	7447	2011-2012	69607	1	95	40	Male	Other Race	0.46	Less than high school	24.4	90.7	heavy	now	no	112	70	no	0	5.329	19	25	88.4	339	0.824	2.79	0.75	1.655	76364.131	93.72776182	2.727272727	5.37	<30	19091.03275	<60	<25	>=90	<1.3
1295	7448	2011-2012	69608	2	92	75	Male	Non-Hispanic Black	1.43	High school or equivalent	26	93.2	heavy	now	yes	133	65	no	1	5.051	20	34	106.96	362.8	0.7	5.82	2.61	2.896	26122.015	67.29346991	48.99328859	-0.44	>=30	6530.50375	>=60	25-30	60-90	1.3-1.8
1296	7453	2011-2012	69613	1	96	27	Female	Other Race	5	More than high school	23.5	78.3	mild	never	no	111	67	no	0	4.607	12	22	57.46	255.8	0.802	4.99	2.35	2.276	28469.893	122.0621351	5.625	-1.55	<30	7117.47325	<60	<25	>=90	>=1.8
1297	7457	2011-2012	69617	1	91	25	Female	Non-Hispanic White	2.69	More than high school	26.3	91.7	heavy	never	no	112	62	no	0	4.718	15	21	74.26	178.4	0.44	5.2	1.42	3.569	197360.858	96.90888082	3.444444444	-0.6	<30	49340.2145	<60	25-30	>=90	>=1.8
1298	7459	2011-2012	69619	1	96	41	Female	Non-Hispanic Black	1.21	More than high school	29.3	97.4	moderate	now	no	111	67	no	0	5.607	7	19	68.07	291.5	1.4	5.35	1.24	3.465	45034.157	110.9132727	2.317880795	3.18	<30	11258.53925	<60	25-30	>=90	<1.3
1299	7462	2011-2012	69622	1	95	58	Male	Non-Hispanic White	1.1	More than high school	51.5	151.8	mild	now	no	112	63	DM	1	7.105	21	24	56.58	345	1.637	5.09	0.75	3.595	56749.49	107.9267818	55.12820513	0.55	>=30	14187.3725	<60	>=30	>=90	<1.3
1300	7466	2011-2012	69626	2	101	53	Male	Non-Hispanic White	4.86	More than high school	34.1	109.8	heavy	never	yes	119	78	DM	0	9.492	37	29	69.84	333.1	0.96	3.34	1.19	1.707	330333.047	102.5175502	4.455445545	-3.45	<30	82583.26175	<60	>=30	>=90	>=1.8
1301	7470	2011-2012	69630	1	103	23	Male	Mexican American	0.51	More than high school	28	84	heavy	never	no	104	73	no	0	4.774	20	26	78.68	434.2	0.768	4.03	1.71	1.965	65986.168	120.5164157	4.811320755	-3.22	<30	16496.542	<60	25-30	>=90	<1.3
1302	7473	2011-2012	69633	1	98	38	Male	Mexican American	5	More than high school	30.8	99.8	heavy	never	yes	128	89	no	0	4.885	23	19	84.86	297.4	1.739	4.14	1.34	1.991	81195.438	99.86282065	6.19047619	3.95	<30	20298.8595	<60	>=30	>=90	>=1.8
1303	7477	2011-2012	69637	1	98	58	Female	Non-Hispanic White	2.6	Less than high school	32.5	103	former	never	yes	127	66	no	0	5.773	28	27	50.39	350.9	1.569	6.78	1.66	4.396	414035.094	102.5116756	9.302325581	-1.8	<30	103508.7735	<60	>=30	>=90	>=1.8
1304	7480	2011-2012	69640	2	90	23	Female	Non-Hispanic Black	1.08	Less than high school	38.5	116.5	mild	never	no	105	60	no	1	5.44	13	18	53.04	356.9	0.869	5.09	1.03	3.672	38233.752	148.5820333	78.05755396	2.73	>=30	9558.438	<60	>=30	>=90	<1.3
1305	7487	2011-2012	69647	2	102	36	Male	Non-Hispanic White	3.44	Less than high school	29.4	102.5	heavy	now	yes	125	83	no	0	5.884	27	29	79.56	291.5	1.152	5.61	1.24	3.853	264922.255	109.4944379	5.582191781	-0.63	<30	66230.56375	<60	25-30	>=90	>=1.8
1306	7489	2011-2012	69649	2	101	27	Male	Other Race	1.84	More than high school	35.2	113.7	mild	former	no	114	76	no	0	5.107	19	20	84.86	339	3.602	4.55	0.98	1.914	31830.225	107.8852557	2.193877551	2.11	<30	7957.55625	<60	>=30	>=90	>=1.8
1307	7490	2011-2012	69650	1	98	48	Male	Non-Hispanic White	0.72	Less than high school	20.8	82.3	heavy	now	no	103	68	preDM	0	5.495	20	20	81.33	279.6	1.626	5.43	1.16	3.517	75150.528	98.00376293	9.027777778	-3.31	<30	18787.632	<60	<25	>=90	<1.3
1308	7493	2011-2012	69653	1	94	28	Male	Non-Hispanic White	3.14	More than high school	28.3	96.4	mild	never	no	128	75	no	1	5.384	38	25	71.6	458	4.087	4.94	0.78	2.302	245428.165	120.9495896	34.70149254	2.78	>=30	61357.04125	<60	25-30	>=90	>=1.8
1309	7498	2011-2012	69658	2	95	73	Male	Non-Hispanic Black	5	More than high school	40	132.3	former	former	yes	111	32	DM	0	6.051	20	20	81.33	416.4	0.644	4.32	1.37	2.664	28220.246	95.04788452	3.62962963	-1.53	<30	7055.0615	>=60	>=30	>=90	>=1.8
1310	7506	2011-2012	69666	1	95	70	Female	Non-Hispanic White	2.7	High school or equivalent	39.8	98.5	never	never	yes	130	43	no	0	5.384	15	24	76.91	303.3	0.847	4.63	1.5	2.741	156072.425	67.71028483	7.307692308	-3.32	<30	39018.10625	>=60	>=30	60-90	>=1.8
1311	7507	2011-2012	69667	1	91	63	Female	Non-Hispanic White	3.4	More than high school	27.2	97	mild	never	yes	137	69	preDM	0	5.495	17	21	73.37	190.3	2.077	5.95	1.58	3.414	287755.997	75.28756723	8.367346939	-0.12	<30	71938.99925	>=60	25-30	60-90	>=1.8
1312	7508	2011-2012	69668	2	95	61	Male	Non-Hispanic White	5	More than high school	25.1	94.7	moderate	former	yes	129	68	no	1	6.106	14	23	123.76	428.3	0.587	5.09	2.79	2.043	265090.476	53.84354798	87.12121212	-3.27	>=30	66272.619	>=60	25-30	<60	>=1.8
1313	7509	2011-2012	69669	1	96	66	Female	Non-Hispanic Black	5	More than high school	26.3	95.9	heavy	former	yes	106	51	no	0	5.662	27	33	87.52	315.2	0.587	4.91	1.76	2.896	34541.943	68.66873846	7.128712871	10.86	<30	8635.48575	>=60	25-30	60-90	>=1.8
1314	7514	2011-2012	69674	1	99	60	Male	Non-Hispanic Black	1.76	High school or equivalent	26.7	101.8	former	former	no	132	85	no	0	5.329	15	18	121.99	392.6	0.598	5.72	1.29	4.138	18401.641	63.78343331	3.087248322	-0.19	<30	4600.41025	>=60	25-30	60-90	1.3-1.8
1315	7519	2011-2012	69679	2	100	26	Male	Non-Hispanic Black	3.06	More than high school	28.1	90.8	mild	never	no	119	58	no	0	4.94	40	29	106.96	291.5	0.756	5.38	1.24	3.801	58942.311	94.94229958	3.157894737	-2.71	<30	14735.57775	<60	25-30	>=90	>=1.8
1316	7520	2011-2012	69680	2	97	37	Male	Non-Hispanic Black	0.33	Less than high school	24.2	90.2	heavy	now	yes	151	90	no	0	4.718	32	44	91.94	297.4	1.535	4.45	1.55	2.198	63622.739	105.5347985	20.37267081	-3.73	<30	15905.68475	<60	<25	>=90	<1.3
1317	7524	2011-2012	69684	2	93	65	Male	Other Race	0.58	Less than high school	32.1	116.4	moderate	former	no	133	85	DM	1	13.322	21	20	95.47	303.3	2.755	4.19	0.88	2.043	17424.805	71.64570135	90.33613445	-2.5	>=30	4356.20125	>=60	>=30	60-90	<1.3
1318	7527	2011-2012	69687	1	97	47	Female	Non-Hispanic White	5	More than high school	23.3	80.2	mild	never	no	128	74	no	0	5.273	19	21	71.6	297.4	0.858	4.24	1.53	2.327	343819.976	86.76454905	7.701149425	2.28	<30	85954.994	<60	<25	60-90	>=1.8
1319	7537	2011-2012	69697	1	98	22	Female	Non-Hispanic Black	0.54	More than high school	26.5	85	moderate	never	no	112	78	no	0	5.107	13	19	76.02	303.3	0.44	4.11	1.78	2.121	55823.919	110.8935937	15.97222222	1.36	<30	13955.97975	<60	25-30	>=90	<1.3
1320	7538	2011-2012	69698	2	99	49	Male	Non-Hispanic Black	0.19	High school or equivalent	34.5	103	former	never	yes	125	70	DM	0	13.378	34	41	122.88	356.9	1.49	4.01	1.14	2.198	44050.255	68.30855228	6.467065868	2.37	<30	11012.56375	<60	>=30	60-90	<1.3
1321	7541	2011-2012	69701	2	101	52	Male	Non-Hispanic Black	2.57	High school or equivalent	24.4	95.4	heavy	never	yes	131	93	no	0	5.384	443	302	77.79	422.3	1.287	5.64	2.15	2.896	59299.533	114.1720553	4.459459459	-0.51	<30	14824.88325	<60	<25	>=90	>=1.8
1322	7544	2011-2012	69704	2	91	30	Male	Non-Hispanic White	1.07	High school or equivalent	23.4	86.9	heavy	now	no	129	56	no	0	5.94	14	20	79.56	380.7	1.423	4.81	1.4	2.767	280493.917	114.2080108	13.90946502	-2.56	<30	70123.47925	<60	<25	>=90	<1.3
1323	7550	2011-2012	69710	1	97	28	Female	Non-Hispanic White	0.93	More than high school	20.6	82	mild	now	no	99	64	no	0	4.441	12	16	57.46	214.1	0.655	4.09	1.29	2.483	121131.83	121.2077001	12.77777778	2.52	<30	30282.9575	<60	<25	>=90	<1.3
1324	7555	2011-2012	69715	1	99	43	Female	Non-Hispanic Black	0.41	More than high school	28	95	mild	never	yes	138	97	no	1	5.44	15	18	42.43	226	0.44	3.15	1.47	1.474	38380.117	138.9423568	104.5454545	-1.55	>=30	9595.02925	<60	25-30	>=90	<1.3
1325	7561	2011-2012	69721	1	96	22	Female	Non-Hispanic Black	1.8	More than high school	23.7	78	never	never	no	110	55	no	0	4.718	16	21	56.58	321.2	0.598	4.29	1.24	2.767	38618.55	146.4858241	3.321167883	1.75	<30	9654.6375	<60	<25	>=90	1.3-1.8
1326	7572	2011-2012	69732	3	90	33	Male	Other Race	0.93	More than high school	28.3	94.5	moderate	former	yes	126	79	preDM	0	6.106	33	26	71.6	380.7	1.592	5.69	1.63	3.336	31933.768	116.7752059	4.88372093	-0.43	<30	7983.442	<60	25-30	>=90	<1.3
1327	7580	2011-2012	69740	2	95	66	Female	Non-Hispanic White	5	More than high school	28.8	96.5	mild	former	no	124	54	no	0	5.384	28	25	68.07	273.6	1.185	5.07	1.55	2.974	191104.314	80.71776653	6.949152542	0.6	<30	47776.0785	>=60	25-30	60-90	>=1.8
1328	7587	2011-2012	69747	3	90	34	Female	Non-Hispanic Black	0.87	More than high school	34.7	118.4	mild	never	no	112	53	no	0	5.384	21	23	58.34	226	0.497	3.78	1.27	2.276	49313.497	133.2876274	3.947368421	0.85	<30	12328.37425	<60	>=30	>=90	<1.3
1329	7593	2011-2012	69753	1	92	63	Female	Mexican American	1.41	More than high school	30.1	102.4	never	never	yes	142	61	preDM	0	5.94	35	29	87.52	285.5	1.581	4.29	1.16	2.405	37024.173	60.83671108	3.798449612	-1.7	<30	9256.04325	>=60	>=30	60-90	1.3-1.8
1330	7595	2011-2012	69755	2	102	65	Female	Non-Hispanic White	5	More than high school	28.8	99.1	mild	never	no	111	75	preDM	0	6.051	31	28	81.33	368.8	2.653	7.24	1.32	4.707	384118.245	65.54924464	23.33333333	4.94	<30	96029.56125	>=60	25-30	60-90	>=1.8
1331	7604	2011-2012	69764	2	100	22	Female	Non-Hispanic Black	3.06	More than high school	23.6	80.5	heavy	never	no	126	66	no	0	4.385	22	24	57.46	303.3	0.339	4.14	1.73	2.25	48538.294	145.7405203	20.52631579	-2.08	<30	12134.5735	<60	<25	>=90	>=1.8
1332	7614	2011-2012	69774	3	90	54	Male	Other Race	3.58	Less than high school	29.6	102.7	heavy	former	no	105	70	no	0	5.773	23	22	74.26	380.7	3.285	4.73	0.96	2.276	48788.34	99.26437585	4.25	-1.62	<30	12197.085	<60	25-30	>=90	>=1.8
1333	7617	2011-2012	69777	1	99	60	Female	Mexican American	2.58	High school or equivalent	36	108.6	moderate	former	yes	85	61	DM	0	5.829	89	64	81.33	416.4	2.032	5.33	1.32	3.077	25732.037	67.89244497	5.149700599	-4.99	<30	6433.00925	>=60	>=30	60-90	>=1.8
1334	7618	2011-2012	69778	2	94	42	Male	Mexican American	4.21	High school or equivalent	29.8	104.4	mild	never	no	119	65	preDM	0	5.884	23	14	68.95	136.8	2.021	3.1	1.06	1.112	61126.477	111.3346477	2.5	0.12	<30	15281.61925	<60	25-30	>=90	>=1.8
1335	7623	2011-2012	69783	2	96	66	Female	Other Race	0.55	More than high school	20.4	67.5	never	never	no	128	68	no	0	5.495	14	23	53.04	285.5	0.926	7.45	2.38	4.655	28118.352	95.28803838	4.959349593	3.85	<30	7029.588	>=60	<25	>=90	<1.3
1336	7633	2011-2012	69793	1	92	35	Male	Other Race	0.24	More than high school	27.3	88.8	mild	never	yes	135	82	no	0	5.329	45	27	85.75	374.7	1.694	4.01	0.67	2.56	49571.747	100.7198284	2.921348315	3.1	<30	12392.93675	<60	25-30	>=90	<1.3
1337	7638	2011-2012	69798	2	101	21	Female	Non-Hispanic White	0.46	More than high school	19.8	74	heavy	never	no	115	70	no	1	4.829	17	20	91.94	368.8	0.903	3.93	1.45	2.069	157569.5	76.98869066	76.5530303	7.29	>=30	39392.375	<60	<25	60-90	<1.3
1338	7643	2011-2012	69803	1	97	44	Male	Other Race	5	More than high school	21.8	85.1	mild	never	no	112	78	no	0	4.552	28	30	85.75	255.8	0.802	5.12	1.14	3.62	43575.922	94.54927731	3.188405797	-0.99	<30	10893.9805	<60	<25	>=90	>=1.8
1339	7653	2011-2012	69813	1	96	30	Female	Non-Hispanic Black	3.35	More than high school	35.1	102	moderate	never	no	108	55	no	0	5.162	14	18	66.3	166.5	0.723	4.34	1.01	3	63918.517	123.697239	8.571428571	7.88	<30	15979.62925	<60	>=30	>=90	>=1.8
1340	7655	2011-2012	69815	2	96	70	Female	Non-Hispanic Black	2.72	More than high school	33.6	123.1	former	never	yes	126	49	DM	1	6.162	24	25	101.66	345	1.4	3.54	1.47	1.422	35577.285	55.70514693	108.3333333	0.47	>=30	8894.32125	>=60	>=30	<60	>=1.8
1341	7663	2011-2012	69823	2	100	55	Female	Non-Hispanic Black	0	More than high school	28.6	96.4	moderate	never	yes	147	84	no	0	5.495	16	23	75.14	226	0.576	6.13	1.73	4.138	43170.462	89.20163289	6.279069767	4.49	<30	10792.6155	<60	25-30	60-90	<1.3
1342	7664	2011-2012	69824	1	99	64	Male	Other Race	1.07	Less than high school	22	78.2	mild	former	no	125	71	preDM	0	6.217	19	32	63.65	261.7	0.61	3.98	1.6	2.095	14952.996	98.58277336	16.57142857	-1.07	<30	3738.249	>=60	<25	>=90	<1.3
1343	7671	2011-2012	69831	2	92	80	Female	Other Race	0.88	Less than high school	22.6	82.4	never	never	yes	137	81	DM	1	5.773	14	26	89.28	374.7	1.14	5.3	2.43	2.353	33525.154	52.69887707	8.08988764	-2.57	<30	8381.2885	>=60	<25	<60	<1.3
1344	7688	2011-2012	69848	1	92	70	Male	Non-Hispanic Black	0.98	Less than high school	34.1	115.5	former	never	no	125	69	DM	0	8.604	52	36	83.98	333.1	1.535	6.78	1.11	4.965	39546.181	93.37838409	12.5	7.14	<30	9886.54525	>=60	>=30	>=90	<1.3
1345	7694	2011-2012	69854	1	95	65	Male	Other Race	4.76	More than high school	41.4	138	former	now	yes	129	70	DM	1	7.216	22	22	80.44	481.8	2.439	4.68	1.01	2.56	324910.949	88.1289134	46.97986577	-2.18	>=30	81227.73725	>=60	>=30	60-90	>=1.8
1346	7698	2011-2012	69858	1	95	65	Male	Non-Hispanic Black	4.21	More than high school	28.1	94.6	former	never	yes	111	68	preDM	0	6.439	20	24	96.36	386.6	1.366	4.6	1.37	2.612	24881.785	81.90667847	5.317919075	6.6	<30	6220.44625	>=60	25-30	60-90	>=1.8
1347	7702	2011-2012	69862	1	94	35	Female	Non-Hispanic White	5	More than high school	28.6	95	heavy	former	no	114	69	no	0	4.885	19	21	62.76	273.6	1.964	4.6	1.5	2.198	149040.649	110.6976436	4.210526316	4.22	<30	37260.16225	<60	25-30	>=90	>=1.8
1348	7703	2011-2012	69863	2	95	43	Male	Non-Hispanic White	3.34	High school or equivalent	32.3	111.2	former	never	yes	154	101	no	0	5.607	35	23	79.56	249.8	1.14	5.61	1.01	4.086	61943.481	104.2405749	5.128205128	-3.53	<30	15485.87025	<60	>=30	>=90	>=1.8
1349	7710	2011-2012	69870	1	102	68	Male	Non-Hispanic White	5	More than high school	27.2	108	mild	never	yes	141	69	no	0	4.996	21	21	96.36	368.8	0.632	4.22	1.37	2.56	317064.383	69.37429268	4.502369668	-2.35	<30	79266.09575	>=60	25-30	60-90	>=1.8
1350	7712	2011-2012	69872	2	101	39	Male	Non-Hispanic White	2.33	Less than high school	27.1	101.6	heavy	now	no	125	52	preDM	0	6.217	21	16	92.82	410.4	1.66	4.32	1.22	2.353	229404.82	88.98178945	7.428571429	-3.04	<30	57351.205	<60	25-30	60-90	>=1.8
1351	7724	2011-2012	69884	2	91	56	Male	Other Race	2.34	More than high school	27.6	90.1	former	now	no	114	70	DM	1	6.939	16	13	73.37	362.8	1.434	2.79	0.85	1.293	40811.613	98.3625103	78.69565217	-0.56	>=30	10202.90325	<60	25-30	>=90	>=1.8
1352	7727	2011-2012	69887	2	97	23	Female	Non-Hispanic Black	0.33	More than high school	31.6	105.2	moderate	never	yes	119	72	no	0	4.996	15	16	60.11	345	0.655	4.78	1.11	3.362	35247.018	142.5878847	4.578313253	0.54	<30	8811.7545	<60	>=30	>=90	<1.3
1353	7733	2011-2012	69893	1	98	22	Male	Non-Hispanic White	1.52	More than high school	26.2	94.9	mild	never	no	98	66	no	0	5.718	15	17	76.91	315.2	0.384	3.08	1.34	1.552	76901.188	122.5050066	3.185840708	1.12	<30	19225.297	<60	25-30	>=90	1.3-1.8
1354	7738	2011-2012	69898	1	95	71	Male	Non-Hispanic White	2.04	High school or equivalent	27.7	104	mild	former	no	131	42	DM	0	7.716	21	26	69.84	374.7	2.292	5.28	1.29	2.922	38848.351	90.34095822	8.396226415	-2.85	<30	9712.08775	>=60	25-30	>=90	>=1.8
1355	7739	2011-2012	69899	2	102	33	Female	Non-Hispanic Black	0.67	Less than high school	37.9	110.4	heavy	never	yes	128	62	preDM	1	6.384	19	19	60.11	333.1	1.456	5.87	0.91	4.293	65136.901	132.9153414	151.2820513	-0.45	>=30	16284.22525	<60	>=30	>=90	<1.3
1356	7750	2011-2012	69910	1	101	20	Male	Non-Hispanic White	0.97	Less than high school	20.5	73.6	heavy	now	no	119	69	no	0	4.94	19	22	77.79	362.8	0.587	4.5	1.71	2.534	250283.431	123.6560518	7.6	-0.39	<30	62570.85775	<60	<25	>=90	<1.3
1357	7756	2011-2012	69916	1	90	22	Female	Other Race	2.44	Less than high school	22	83	former	never	no	96	60	no	1	4.996	12	17	55.69	214.1	0.666	4.37	1.03	3.026	80379.58	127.7321356	35.33333333	-0.81	>=30	20094.895	<60	<25	>=90	>=1.8
1358	7757	2011-2012	69917	1	98	33	Female	Non-Hispanic White	3.7	More than high school	33.8	106.5	moderate	never	no	110	77	no	0	4.607	16	16	56.58	279.6	0.519	4.76	1.94	2.586	148720.507	117.6228603	7.215189873	1.75	<30	37180.12675	<60	>=30	>=90	>=1.8
1359	7765	2011-2012	69925	1	99	80	Female	Mexican American	1.3	Less than high school	35.3	111.9	moderate	never	yes	136	62	preDM	0	4.607	33	52	52.16	273.6	1.095	4.91	1.58	2.845	47365.438	86.84189966	11.39344262	-6.05	<30	11841.3595	>=60	>=30	60-90	1.3-1.8
1360	7770	2011-2012	69930	1	94	27	Female	Non-Hispanic White	3.14	More than high school	30	110.5	mild	never	no	117	73	preDM	0	4.663	16	19	55.69	309.3	3.093	5.2	1.37	2.405	239925.078	123.323663	14.57943925	7.53	<30	59981.2695	<60	>=30	>=90	>=1.8
1361	7783	2011-2012	69943	1	98	40	Male	Non-Hispanic White	5	More than high school	28.5	91	mild	never	no	115	76	no	0	4.607	20	24	89.28	297.4	0.734	4.81	1.76	2.715	237068.803	92.60697654	2.625	3.08	<30	59267.20075	<60	25-30	>=90	>=1.8
1362	7788	2011-2012	69948	1	90	45	Male	Non-Hispanic White	1.07	More than high school	33.7	120.1	mild	never	yes	136	80	DM	0	15.376	21	14	65.42	255.8	1.942	4.29	0.8	2.612	59727.848	111.3973166	12.47058824	5.9	<30	14931.962	<60	>=30	>=90	<1.3
1363	7802	2011-2012	69962	2	102	69	Male	Mexican American	1.09	High school or equivalent	32	108	never	never	yes	103	74	preDM	1	5.718	21	17	480.01	309.3	1.908	5.61	1.34	3.388	24016.97	9.886064936	7.757575758	-2.78	<30	6004.2425	>=60	>=30	<60	<1.3
1364	7803	2011-2012	69963	2	101	20	Female	Non-Hispanic Black	1.79	More than high school	23.4	72.1	heavy	never	no	122	67	no	0	5.162	22	19	73.37	196.3	0.677	3.78	1.71	1.758	83115.885	117.3954256	6	2.12	<30	20778.97125	<60	<25	>=90	1.3-1.8
1365	7813	2011-2012	69973	1	98	55	Female	Non-Hispanic White	1.03	High school or equivalent	33	106	former	now	yes	138	78	preDM	0	5.44	19	16	48.62	232	1.852	6.85	1.29	4.707	60226.747	105.9324678	11.93548387	-2.85	<30	15056.68675	<60	>=30	>=90	<1.3
1366	7830	2011-2012	69990	2	90	23	Female	Non-Hispanic Black	0.67	More than high school	31	106.2	mild	never	yes	115	62	no	0	5.495	29	22	56.58	190.3	0.452	3.1	1.22	1.681	47503.906	145.4604233	5.384615385	11.71	<30	11875.9765	<60	>=30	>=90	<1.3
1367	7831	2011-2012	69991	2	90	56	Female	Non-Hispanic White	1.29	High school or equivalent	29.4	90.5	mild	never	no	105	74	no	0	5.218	20	23	61	267.7	1.264	5.48	1.47	3.439	63947.847	97.62843154	3.448275862	18.23	<30	15986.96175	<60	25-30	>=90	<1.3
1368	7834	2011-2012	69994	2	100	21	Female	Other Race	3.13	High school or equivalent	18.2	64.2	heavy	now	no	84	45	no	0	5.218	9	12	60.11	214.1	0.802	4.68	1.58	2.741	171690.637	125.4407186	26.44628099	2.6	<30	42922.65925	<60	<25	>=90	>=1.8
1369	7839	2011-2012	69999	2	93	29	Female	Non-Hispanic Black	1.05	High school or equivalent	25.2	80.4	mild	never	no	124	87	no	0	4.996	12	17	69.84	208.2	1.073	5.02	1.14	3.388	49598.298	116.9845938	4.24437299	3.74	<30	12399.5745	<60	25-30	>=90	<1.3
1370	7848	2011-2012	70008	1	95	55	Female	Non-Hispanic White	2.04	More than high school	26	96	mild	never	no	112	74	no	0	5.495	14	21	67.18	303.3	1.885	6.26	1.4	4.008	348078.137	88.59129633	5.090909091	2.07	<30	87019.53425	<60	25-30	60-90	>=1.8
1371	7854	2011-2012	70014	1	93	32	Male	Non-Hispanic White	5	More than high school	28.6	103.2	mild	never	no	105	70	preDM	0	5.662	20	24	73.37	345	1.502	4.81	1.16	2.948	200541.249	116.4253735	3.84	-2.1	<30	50135.31225	<60	25-30	>=90	>=1.8
1372	7886	2011-2012	70046	2	95	55	Male	Non-Hispanic White	1.16	More than high school	22.4	85.7	former	never	yes	125	83	preDM	0	5.995	38	25	64.53	362.8	1.976	5.07	1.34	2.819	43804.918	104.4229014	3.908045977	5.94	<30	10951.2295	<60	<25	>=90	<1.3
1373	7889	2011-2012	70049	2	102	41	Male	Other Race	2.68	Less than high school	32.8	106.1	mild	now	yes	146	79	no	0	5.829	45	31	100.78	386.6	3.613	6.05	0.85	3.543	48157.398	79.43639554	3.75	-2.56	<30	12039.3495	<60	>=30	60-90	>=1.8
1374	7892	2011-2012	70052	1	93	28	Female	Other Race	1.84	More than high school	17.9	68.5	heavy	never	no	108	75	no	0	5.218	14	20	55.69	226	0.948	3.98	1.68	1.862	28145.168	122.4603974	22.22222222	-3.61	<30	7036.292	<60	<25	>=90	>=1.8
1375	7898	2011-2012	70058	3	91	38	Male	Other Race	2.45	More than high school	20.8	74.8	mild	never	no	127	76	no	0	5.94	12	19	101.66	339	0.869	5.84	1.47	3.982	44900.385	80.27606213	3.076923077	5.82	<30	11225.09625	<60	<25	60-90	>=1.8
1376	7899	2011-2012	70059	2	95	74	Female	Non-Hispanic White	1.27	Less than high school	27.7	101.4	never	never	no	129	59	DM	1	7.105	31	29	114.92	350.9	3.218	6.1	1.09	3.543	57682.67	40.51099389	4.406779661	-4	<30	14420.6675	>=60	25-30	<60	<1.3
1377	7912	2011-2012	70072	2	101	53	Male	Non-Hispanic Black	2.16	More than high school	35.2	122	mild	now	yes	149	84	DM	0	9.548	61	26	109.62	315.2	1.626	6.44	0.98	4.707	56584.304	76.24829753	9.175824176	-1.62	<30	14146.076	<60	>=30	60-90	>=1.8
1378	7922	2011-2012	70082	1	103	29	Female	Non-Hispanic Black	4.39	More than high school	27.5	90.4	moderate	never	no	107	58	no	0	4.607	17	24	72.49	273.6	0.294	4.4	2.28	1.991	51385.695	111.8301422	3.806451613	-0.2	<30	12846.42375	<60	25-30	>=90	>=1.8
1379	7941	2011-2012	70101	1	93	45	Female	Non-Hispanic Black	2.72	High school or equivalent	25.2	87.4	mild	never	no	104	62	no	0	3.997	13	18	65.42	196.3	0.542	5.04	1.58	3.207	69587.863	113.14794	3.555555556	-1.68	<30	17396.96575	<60	25-30	>=90	>=1.8
1380	7942	2011-2012	70102	1	100	68	Male	Non-Hispanic White	2.24	More than high school	31.9	111.7	heavy	former	yes	164	92	preDM	1	6.661	26	26	110.5	428.3	2.721	6.39	1.19	3.957	204596.46	58.78723019	7.887323944	-2.43	<30	51149.115	>=60	>=30	<60	>=1.8
1381	7949	2011-2012	70109	1	98	57	Male	Other Race	5	More than high school	30.3	111.6	moderate	never	yes	126	94	preDM	0	6.606	45	25	86.63	350.9	2.134	6.83	1.29	4.551	59353.062	85.23405399	21.05263158	-0.57	<30	14838.2655	<60	>=30	60-90	>=1.8
1382	7958	2011-2012	70118	2	91	80	Female	Non-Hispanic White	1.84	More than high school	20.5	80.5	mild	former	yes	141	80	preDM	0	5.662	21	26	62.76	232	1.005	6.7	1.76	4.474	126020.212	80.69647394	26	-1.6	<30	31505.053	>=60	<25	60-90	>=1.8
1383	7962	2011-2012	70122	2	101	37	Female	Non-Hispanic White	2.33	More than high school	43.6	128.3	moderate	now	yes	126	56	no	0	5.662	13	16	68.07	297.4	1.287	6.54	1.86	4.086	181104.129	98.95572615	8.153846154	-2.06	<30	45276.03225	<60	>=30	>=90	>=1.8
1384	7965	2011-2012	70125	2	101	30	Male	Non-Hispanic Black	1.52	High school or equivalent	39.3	122.5	heavy	former	yes	127	73	no	0	5.107	12	18	76.02	291.5	0.452	5.25	1.97	3.077	106687.732	134.5178345	6.722689076	0.01	<30	26671.933	<60	>=30	>=90	1.3-1.8
1385	7967	2011-2012	70127	1	91	26	Female	Non-Hispanic White	1.29	More than high school	29.5	103.2	mild	former	no	107	47	no	0	4.94	19	19	60.11	237.9	1.118	4.32	1.16	2.638	334401.244	121.1113307	5.321637427	0.76	<30	83600.311	<60	25-30	>=90	<1.3
1386	7991	2011-2012	70151	3	92	80	Female	Non-Hispanic White	2.69	High school or equivalent	30.7	97.7	mild	former	yes	119	58	preDM	0	6.273	16	21	63.65	345	1.152	7.11	1.78	4.81	180969.826	79.34341957	8.064516129	0.84	<30	45242.4565	>=60	>=30	60-90	>=1.8
1387	8000	2011-2012	70160	2	90	61	Female	Other Race	1.7	Less than high school	24.1	87.2	former	never	no	108	73	DM	0	5.551	27	27	72.49	232	2.608	5.02	1.45	2.379	31526.826	77.4799324	4.054054054	-0.42	<30	7881.7065	>=60	<25	60-90	1.3-1.8
1388	8001	2011-2012	70161	2	102	34	Male	Mexican American	1.33	Less than high school	44.9	137	moderate	never	no	98	69	DM	1	5.884	38	26	60.11	410.4	1.163	6.41	1.19	4.681	73931.007	124.6023031	58.16037736	5.43	>=30	18482.75175	<60	>=30	>=90	1.3-1.8
1389	8003	2011-2012	70163	1	90	53	Female	Non-Hispanic White	5	More than high school	34.3	102	moderate	never	no	120	57	no	0	5.884	22	19	63.65	327.1	0.655	5.74	1.73	3.698	346180.099	95.91382362	4.285714286	0.57	<30	86545.02475	<60	>=30	>=90	>=1.8
1390	8009	2011-2012	70169	1	95	23	Female	Other Race	0.96	High school or equivalent	23.3	94	former	now	no	108	59	no	0	4.94	20	15	58.34	237.9	0.734	3.21	0.98	1.888	137581.936	124.9115242	17.11864407	-5.27	<30	34395.484	<60	<25	>=90	<1.3
1391	8015	2011-2012	70175	1	96	62	Female	Non-Hispanic Black	2.31	High school or equivalent	34.9	100.6	never	never	yes	124	66	no	0	5.051	29	32	80.44	350.9	0.497	3.83	1.76	1.836	43955.554	78.19950101	3.434343434	5.46	<30	10988.8885	>=60	>=30	60-90	>=1.8
1392	8016	2011-2012	70176	2	99	23	Female	Mexican American	0.22	More than high school	21.9	81.2	heavy	never	no	103	51	no	0	5.107	11	20	50.39	309.3	1.14	5.02	1.58	2.922	97339.916	131.0839849	11.11111111	-0.58	<30	24334.979	<60	<25	>=90	<1.3
1393	8036	2011-2012	70196	2	96	37	Male	Mexican American	0.78	Less than high school	30.9	106.9	former	never	no	95	45	no	0	6.051	37	34	83.1	339	3.071	5.92	1.03	3.491	74574.9	103.1594281	5.714285714	-4.18	<30	18643.725	<60	>=30	>=90	<1.3
1394	8042	2011-2012	70202	1	95	22	Male	Other Race	0.73	More than high school	27	94	heavy	now	no	117	77	preDM	0	6.162	67	39	60.11	493.7	4.313	4.89	0.93	1.991	20876.719	135.5611011	7.414634146	-2.82	<30	5219.17975	<60	25-30	>=90	<1.3
1395	8044	2011-2012	70204	2	100	20	Female	Non-Hispanic Black	1.38	More than high school	40.8	122.2	mild	never	yes	112	69	no	0	5.773	14	20	61	297.4	1.163	2.77	0.93	1.293	37073.786	144.9268865	10	-0.84	<30	9268.4465	<60	>=30	>=90	1.3-1.8
1396	8046	2011-2012	70206	2	100	34	Female	Other Race	5	More than high school	22.5	80.4	mild	never	no	100	64	no	0	4.94	12	18	68.07	226	0.903	3.67	1.29	1.965	29442.85	101.0632324	2.619047619	-0.07	<30	7360.7125	<60	<25	>=90	>=1.8
1397	8052	2011-2012	70212	2	95	40	Female	Non-Hispanic White	1.05	Less than high school	27.8	94.3	mild	now	no	99	58	no	0	5.162	17	18	60.11	261.7	1.061	5.64	1.03	4.112	45001.109	109.7676218	6.971428571	-4.2	<30	11250.27725	<60	25-30	>=90	<1.3
1398	8053	2011-2012	70213	1	101	35	Male	Non-Hispanic White	3.15	More than high school	28.2	96.5	mild	never	no	124	81	no	0	5.829	17	15	83.98	339	0.621	3.67	1.37	2.017	202328.235	103.289022	2.689655172	3.26	<30	50582.05875	<60	25-30	>=90	>=1.8
1399	8057	2011-2012	70217	1	100	40	Male	Other Race	5	More than high school	20.7	80.8	never	never	no	112	75	no	0	5.44	26	26	105.2	392.6	2.552	6.15	1.06	3.931	49698.955	75.95073308	4.090909091	-0.69	<30	12424.73875	<60	<25	60-90	>=1.8
1400	8059	2011-2012	70219	1	95	69	Female	Other Race	0.96	Less than high school	29.9	102.5	former	never	yes	175	63	no	0	5.44	14	25	50.39	178.4	1.637	5.35	1.34	3.258	83876.82	94.88882436	8.545454545	-5.18	<30	20969.205	>=60	25-30	>=90	<1.3
1401	8060	2011-2012	70220	2	102	31	Female	Mexican American	3.04	Less than high school	27.5	90	moderate	former	no	139	88	no	1	5.551	17	20	52.16	237.9	2.123	4.03	1.09	1.965	100811.22	122.5225815	305.5900621	-1.64	>=30	25202.805	<60	25-30	>=90	>=1.8
1402	8063	2011-2012	70223	2	91	47	Male	Non-Hispanic White	0.79	More than high school	31.1	109	heavy	never	no	106	69	no	0	5.162	24	17	82.21	428.3	1.558	5.92	1.22	3.982	315154.846	97.41304097	29.81530343	-1.65	<30	78788.7115	<60	>=30	>=90	<1.3
1403	8065	2011-2012	70225	2	98	25	Male	Non-Hispanic White	4.42	More than high school	33.9	108.8	heavy	former	yes	118	90	preDM	0	5.551	54	32	105.2	529.4	2.371	4.78	0.93	2.767	241857.884	84.39043833	2.099447514	3.81	<30	60464.471	<60	>=30	60-90	>=1.8
1404	8067	2011-2012	70227	1	90	46	Female	Other Race	5	More than high school	28.4	94	mild	never	no	123	80	no	0	5.384	23	19	49.5	273.6	0.497	3.78	1.37	2.172	47669.587	112.1789362	12.25490196	-4.68	<30	11917.39675	<60	25-30	>=90	>=1.8
1405	8071	2011-2012	70231	2	102	37	Female	Other Race	5	More than high school	31.8	100.5	former	now	yes	158	100	no	0	5.273	21	27	60.11	226	1.919	4.37	0.83	2.664	46616.493	112.105394	7.179487179	-1.83	<30	11654.12325	<60	>=30	>=90	>=1.8
1406	8078	2011-2012	70238	1	103	25	Female	Mexican American	0.51	Less than high school	23.7	81.6	heavy	never	no	108	57	no	1	5.44	15	15	66.3	261.7	0.723	3.44	1.6	1.5	73053.79	111.1394306	44.11764706	-3.93	>=30	18263.4475	<60	<25	>=90	<1.3
1407	8088	2011-2012	70248	2	93	67	Female	Other Race	0.66	Less than high school	24.3	91.1	never	never	no	126	74	DM	0	5.718	19	19	53.04	148.7	1.027	6.7	1.78	4.448	18046.515	94.62102212	7.707317073	-4.7	<30	4511.62875	>=60	<25	>=90	<1.3
1408	8094	2011-2012	70254	1	101	42	Female	Non-Hispanic White	3.25	Less than high school	31.2	96.6	mild	never	no	111	70	no	0	5.773	13	18	45.97	273.6	1.061	6.15	1.47	4.189	281023.616	118.2233017	4.274193548	0.22	<30	70255.904	<60	>=30	>=90	>=1.8
1409	8101	2011-2012	70261	1	98	24	Male	Non-Hispanic White	1.34	More than high school	41	129.9	heavy	never	yes	141	101	no	0	5.884	31	40	88.4	511.5	3.466	5.02	0.78	2.664	87093.642	104.8770035	4.333333333	-2.53	<30	21773.4105	<60	>=30	>=90	1.3-1.8
1410	8105	2011-2012	70265	2	100	46	Female	Non-Hispanic White	1.3	High school or equivalent	27.6	97	heavy	never	no	109	61	no	0	4.552	13	11	82.21	315.2	1.276	4.22	1.68	1.94	45333.48	73.93593484	4.285714286	-1.82	<30	11333.37	<60	25-30	60-90	1.3-1.8
1411	8107	2011-2012	70267	2	97	32	Male	Non-Hispanic White	5	High school or equivalent	24.1	81.2	mild	former	no	109	64	no	0	4.996	18	19	83.98	309.3	1.005	4.55	1.19	2.896	52661.007	105.4888164	4.545454545	-2.33	<30	13165.25175	<60	<25	>=90	>=1.8
1412	8121	2011-2012	70281	1	100	30	Female	Other Race	3.13	More than high school	25.1	89.9	moderate	never	no	123	71	preDM	0	5.829	15	19	66.3	297.4	1.106	4.84	2.02	2.302	43985.528	107.303629	17.09677419	6.4	<30	10996.382	<60	25-30	>=90	>=1.8
1413	8122	2011-2012	70282	2	94	24	Male	Mexican American	1.23	Less than high school	28.4	92.8	heavy	former	no	120	84	no	0	5.329	46	28	85.75	374.7	0.937	3.96	1.14	2.379	73715.26	108.8111108	8.831168831	6.3	<30	18428.815	<60	25-30	>=90	<1.3
1414	8128	2011-2012	70288	1	98	37	Female	Non-Hispanic White	1.11	Less than high school	29.7	97.5	never	now	no	115	74	no	0	5.273	22	18	59.23	297.4	1.332	4.5	0.8	3.077	165109.644	112.6531478	4.430379747	-2.43	<30	41277.411	<60	25-30	>=90	<1.3
1415	8130	2011-2012	70290	2	91	60	Male	Non-Hispanic Black	3.14	More than high school	22.1	87	heavy	now	no	139	84	DM	1	5.829	15	21	83.1	565.1	2.032	6.7	1.89	3.879	28605.414	101.4635686	100.5747126	-3.12	>=30	7151.3535	>=60	<25	>=90	>=1.8
1416	8131	2011-2012	70291	2	95	25	Female	Non-Hispanic White	0.9	More than high school	40.5	130.4	mild	now	yes	111	78	no	0	5.162	13	17	79.56	339	1.682	6.36	0.88	4.707	73783.12	89.15342682	3.536585366	-4.2	<30	18445.78	<60	>=30	60-90	<1.3
1417	8135	2011-2012	70295	1	96	47	Male	Non-Hispanic Black	4.9	High school or equivalent	33.7	106.5	mild	never	yes	129	77	preDM	0	5.773	39	44	96.36	339	3.952	6.08	1.32	2.948	55748.493	92.94645741	4.350453172	2.72	<30	13937.12325	<60	>=30	>=90	>=1.8
1418	8137	2011-2012	70297	1	94	73	Male	Non-Hispanic White	2.51	Less than high school	24.7	94.7	mild	former	yes	149	68	no	0	4.885	17	21	86.63	404.5	0.7	4.16	1.63	2.224	124280.202	76.1730107	2.987012987	0.36	<30	31070.0505	>=60	<25	60-90	>=1.8
1419	8140	2011-2012	70300	1	99	46	Male	Non-Hispanic White	0.61	More than high school	28.7	103	former	never	yes	118	88	preDM	0	5.94	46	32	87.52	315.2	3.895	5.07	0.85	2.431	53802.801	90.95797584	8.177339901	-1.61	<30	13450.70025	<60	25-30	>=90	<1.3
1420	8143	2011-2012	70303	1	97	56	Male	Other Race	5	More than high school	32.4	107.8	heavy	former	no	122	77	no	1	5.551	37	29	125.53	398.5	1.513	4.55	1.16	2.689	75542.423	54.82007356	5.294117647	5.01	<30	18885.60575	<60	>=30	<60	>=1.8
1421	8146	2011-2012	70306	1	92	20	Male	Non-Hispanic Black	1.31	More than high school	17.9	66.1	never	never	no	92	63	no	1	5.607	15	26	83.98	327.1	0.474	3.8	1.53	2.069	100673.829	132.6734216	140.8934708	1.8	>=30	25168.45725	<60	<25	>=90	1.3-1.8
1422	8157	2011-2012	70317	2	92	51	Male	Other Race	1.61	High school or equivalent	27.2	94.7	mild	former	yes	NA	NA	DM	1	8.104	76	40	53.92	434.2	2.506	10.68	2.15	7.396	33880.144	115.6255722	348.7394958	-3.18	>=30	8470.036	<60	25-30	>=90	1.3-1.8
1423	8166	2011-2012	70326	1	95	35	Male	Other Race	0.89	High school or equivalent	39.5	126.7	former	now	yes	163	102	DM	0	8.049	87	47	78.68	505.6	2.032	4.97	0.78	3.258	54322.827	110.7738343	16.48854962	-2.68	<30	13580.70675	<60	>=30	>=90	<1.3
1424	8168	2011-2012	70328	2	96	27	Male	Mexican American	0.06	High school or equivalent	31.8	109.4	heavy	now	no	117	74	no	0	5.94	38	25	66.3	380.7	3.093	7.47	1.09	4.965	77921.151	125.7165094	4.558139535	0.02	<30	19480.28775	<60	>=30	>=90	<1.3
1425	8169	2011-2012	70329	2	90	60	Female	Other Race	0.46	Less than high school	26.1	91.8	never	never	yes	104	65	no	0	5.495	23	28	56.58	226	1.897	6.18	1.24	4.06	35389.105	97.30192796	5.918367347	-3.2	<30	8847.27625	>=60	25-30	>=90	<1.3
1426	8170	2011-2012	70330	3	91	77	Male	Other Race	1.33	Less than high school	29.5	104.9	mild	former	yes	159	83	DM	1	6.994	17	17	164.42	588.9	1.4	4.65	0.85	3.155	21718.917	34.13102188	99.06542056	-2.78	>=30	5429.72925	>=60	25-30	<60	1.3-1.8
1427	8172	2011-2012	70332	2	97	80	Male	Non-Hispanic White	1.29	Less than high school	34.2	124.2	former	former	yes	125	51	DM	1	10.824	15	22	198.02	475.8	2.766	3.9	0.8	1.836	25182.836	26.69244349	32.08737864	-2.92	>=30	6295.709	>=60	>=30	<60	<1.3
1428	8173	2011-2012	70333	1	98	20	Female	Mexican American	5	More than high school	18	72.7	moderate	never	no	97	80	no	0	4.996	13	20	68.95	172.5	1.197	5.48	2.3	2.638	112956.588	109.7813628	10.86956522	2.42	<30	28239.147	<60	<25	>=90	>=1.8
1429	8181	2011-2012	70341	1	92	62	Male	Other Race	5	More than high school	28.2	98.6	moderate	never	no	114	66	no	0	5.495	25	28	87.52	392.6	0.971	3.62	1.42	1.758	22030.714	81.28843511	3.974358974	-0.88	<30	5507.6785	>=60	25-30	60-90	>=1.8
1430	8191	2011-2012	70351	1	94	80	Female	Non-Hispanic White	2.24	More than high school	23.2	93.1	mild	former	yes	114	49	preDM	1	5.94	14	22	67.18	356.9	1.264	7.53	2.2	4.758	97248.535	74.32283531	33.78378378	2.42	>=30	24312.13375	>=60	<25	60-90	>=1.8
1431	8197	2011-2012	70357	1	91	43	Female	Other Race	5	More than high school	24.6	80.5	mild	never	no	123	81	no	0	4.996	18	21	44.2	202.2	1.253	4.65	1.11	2.974	35467.747	118.9203835	7.727272727	-1.74	<30	8866.93675	<60	<25	>=90	>=1.8
1432	8208	2011-2012	70368	2	96	55	Male	Non-Hispanic Black	5	More than high school	42.5	134.9	mild	never	yes	157	86	DM	1	8.826	17	8	525.98	481.8	1.185	3.78	0.91	2.327	42034.074	11.28975335	2403.846154	1.3	>=30	10508.5185	<60	>=30	<60	>=1.8
1433	8218	2011-2012	70378	1	93	53	Male	Non-Hispanic Black	1.79	More than high school	20.6	85	heavy	former	no	102	74	preDM	0	6.661	22	28	69.84	386.6	1.569	5.87	1.06	4.086	63623.481	118.5131964	5.164835165	0.69	<30	15905.87025	<60	<25	>=90	1.3-1.8
1434	8221	2011-2012	70381	1	95	24	Male	Other Race	0.96	High school or equivalent	38.4	126.1	former	never	no	118	77	DM	0	7.827	89	57	75.14	392.6	1.242	4.89	1.16	3.155	85314.802	121.9561117	4.339622642	2.61	<30	21328.7005	<60	>=30	>=90	<1.3
1435	8227	2011-2012	70387	2	102	60	Female	Mexican American	3.67	High school or equivalent	33.8	107.8	former	former	no	116	68	preDM	0	5.995	16	16	57.46	279.6	1.773	5.82	1.34	3.672	40961.703	96.80686645	4.545454545	0.77	<30	10240.42575	>=60	>=30	>=90	>=1.8
1436	8234	2011-2012	70394	1	103	47	Male	Other Race	5	More than high school	26.9	100	mild	now	no	122	72	no	0	4.552	36	33	76.02	350.9	1.581	4.73	1.16	2.845	29341.387	103.2639182	2.272727273	19.59	<30	7335.34675	<60	25-30	>=90	>=1.8
1437	8238	2011-2012	70398	2	90	57	Female	Other Race	1.7	Less than high school	27.3	83.3	mild	never	no	102	52	no	0	5.44	22	20	56.58	261.7	0.677	5.17	2.07	2.793	50409.733	99.3742125	11.53846154	-1.14	<30	12602.43325	<60	25-30	>=90	1.3-1.8
1438	8239	2011-2012	70399	1	94	24	Male	Other Race	0.9	More than high school	24.3	89.2	mild	now	no	115	68	no	0	5.607	27	19	79.56	327.1	0.723	4.6	1.27	3	32040.817	119.1244961	7.211538462	-2.41	<30	8010.20425	<60	<25	>=90	<1.3
1439	8241	2011-2012	70401	3	91	47	Male	Other Race	5	More than high school	22.3	83.4	mild	former	no	122	82	no	0	4.885	25	24	72.49	339	1.163	5.74	2.51	2.689	35420.969	105.305237	12.11764706	-2.25	<30	8855.24225	<60	<25	>=90	>=1.8
1440	8245	2011-2012	70405	1	91	61	Female	Non-Hispanic White	5	More than high school	32.7	111.6	never	never	no	107	80	no	0	4.885	15	21	82.21	267.7	1.592	6.39	1.37	4.293	253795.163	66.54176189	4.358974359	1.17	<30	63448.79075	>=60	>=30	60-90	>=1.8
1441	8248	2011-2012	70408	1	93	33	Male	Non-Hispanic Black	5	More than high school	30.9	116.9	never	never	no	139	78	no	0	5.107	33	31	91.05	356.9	1.592	5.72	1.11	3.879	68419.299	109.817561	3.274336283	-2.33	<30	17104.82475	<60	>=30	>=90	>=1.8
1442	8249	2011-2012	70409	1	101	44	Male	Non-Hispanic White	1.31	High school or equivalent	29.2	105.1	mild	now	no	112	71	preDM	0	5.329	23	23	84.86	345	3.105	8.02	1.11	5.482	253827.159	95.74129988	10.51724138	4.12	<30	63456.78975	<60	25-30	>=90	1.3-1.8
1443	8253	2011-2012	70413	1	99	51	Male	Other Race	3.51	More than high school	26.4	86.8	mild	former	no	114	77	preDM	0	5.107	14	101	101.66	350.9	0.655	6.36	1.58	4.474	21860.188	73.27001675	3.422818792	-0.66	<30	5465.047	<60	25-30	60-90	>=1.8
1444	8257	2011-2012	70417	3	92	80	Male	Mexican American	1.65	Less than high school	21.6	86.6	mild	never	no	131	66	DM	1	8.993	10	16	113.15	345	0.485	3	1.47	1.293	26606.697	52.50749901	14.52631579	-4.62	<30	6651.67425	>=60	<25	<60	1.3-1.8
1445	8261	2011-2012	70421	2	90	51	Female	Other Race	2.7	Less than high school	36.8	116	heavy	now	no	95	57	no	0	5.662	15	21	61	303.3	1.637	5.46	1.14	3.569	48476.977	101.1183722	5.813953488	-1.89	<30	12119.24425	<60	>=30	>=90	>=1.8
1446	8265	2011-2012	70425	1	90	77	Male	Non-Hispanic White	3.3	Less than high school	23.9	105.1	mild	former	yes	145	65	DM	1	7.438	14	15	69.84	303.3	0.756	2.17	1.01	0.828	135948.951	86.61242209	560.8695652	-0.89	>=30	33987.23775	>=60	<25	60-90	>=1.8
1447	8267	2011-2012	70427	2	92	36	Female	Non-Hispanic White	5	More than high school	22.7	69.7	moderate	never	no	84	48	no	1	5.495	35	27	58.34	214.1	0.508	4.63	2.15	2.25	163867.302	114.0099456	49.11838791	-3.57	>=30	40966.8255	<60	<25	>=90	>=1.8
1448	8270	2011-2012	70430	2	94	37	Female	Non-Hispanic White	4.71	More than high school	19.9	69.9	mild	former	no	101	66	no	0	5.051	14	23	72.49	255.8	0.508	4.81	1.78	2.793	220392.918	91.70800992	26.41025641	-1.43	<30	55098.2295	<60	<25	>=90	>=1.8
1449	8277	2011-2012	70437	1	100	43	Male	Mexican American	1.3	Less than high school	29.8	95.8	heavy	former	no	125	82	preDM	0	5.773	62	27	76.91	428.3	2.506	6.98	1.09	4.758	78427.863	105.7031809	6.421052632	0.37	<30	19606.96575	<60	25-30	>=90	1.3-1.8
1450	8279	2011-2012	70439	2	103	24	Female	Non-Hispanic White	3.44	More than high school	22.8	78	mild	never	no	106	60	no	0	4.885	19	15	56.58	267.7	0.621	3.41	1.68	1.448	177454.761	125.2992582	9.2	-1.63	<30	44363.69025	<60	<25	>=90	>=1.8
1451	8283	2011-2012	70443	1	92	52	Female	Other Race	3.3	More than high school	36.9	110	never	never	yes	127	63	DM	0	6.772	12	17	62.76	291.5	0.892	3.59	0.78	2.405	72559.417	98.2371152	7.384615385	0.87	<30	18139.85425	<60	>=30	>=90	>=1.8
1452	8288	2011-2012	70448	3	91	29	Male	Mexican American	0.89	High school or equivalent	29.3	95.9	heavy	former	no	127	64	no	0	5.662	33	29	82.21	232	1.66	5.56	1.16	3.646	99718.216	110.5428426	8.440366972	2.87	<30	24929.554	<60	25-30	>=90	<1.3
1453	8304	2011-2012	70464	2	97	60	Female	Non-Hispanic Black	1.65	More than high school	26.1	93.6	mild	never	yes	160	105	no	0	6.106	16	21	100.78	303.3	1.219	6.49	1.6	4.319	40732.307	60.39327246	8.586956522	0.54	<30	10183.07675	>=60	25-30	60-90	1.3-1.8
1454	8316	2011-2012	70476	2	94	30	Male	Non-Hispanic White	1.62	Less than high school	28.6	93.5	heavy	now	no	109	70	no	0	4.885	13	19	83.1	380.7	1.434	4.19	0.78	2.767	43485.94	108.3587999	2	-0.45	<30	10871.485	<60	25-30	>=90	1.3-1.8
1455	8321	2011-2012	70481	2	96	24	Male	Non-Hispanic White	0.53	More than high school	39.8	127.2	mild	now	no	127	82	no	0	5.718	37	31	92.82	588.9	2.924	6.44	0.8	4.293	72014.637	98.86951594	5.169902913	-3.77	<30	18003.65925	<60	>=30	>=90	<1.3
1456	8323	2011-2012	70483	2	91	20	Male	Other Race	2.59	High school or equivalent	38.9	123.5	never	never	yes	149	80	preDM	0	5.995	33	28	99.89	594.8	0.881	4.65	1.14	3.103	33131.49	93.04894176	10.33898305	-1.19	<30	8282.8725	<60	>=30	>=90	>=1.8
1457	8325	2011-2012	70485	3	90	34	Male	Other Race	4.71	More than high school	20.6	76.8	mild	former	no	99	66	no	0	5.44	29	24	72.49	303.3	2.213	4.86	1.32	2.534	37512.588	115.3744755	6.779661017	-1.93	<30	9378.147	<60	<25	>=90	>=1.8
1458	8329	2011-2012	70489	2	93	40	Male	Other Race	1.83	More than high school	30.3	105.8	moderate	never	no	129	78	no	0	5.718	26	27	68.07	327.1	0.847	5.61	1.42	3.801	79623.773	113.5102384	3.238095238	2.97	<30	19905.94325	<60	>=30	>=90	>=1.8
1459	8333	2011-2012	70493	2	95	52	Male	Other Race	0.67	Less than high school	29.7	96	heavy	former	yes	119	76	DM	0	12.379	26	20	75.14	297.4	0.96	6.28	1.32	4.526	41786.69	100.180346	8.624338624	-3.34	<30	10446.6725	<60	25-30	>=90	<1.3
1460	8334	2011-2012	70494	2	98	25	Male	Mexican American	1.97	High school or equivalent	37.1	120.6	heavy	never	no	132	84	DM	0	7.05	53	32	68.07	475.8	1.964	5.74	0.93	3.905	84848.7	126.1235854	6.338028169	0.38	<30	21212.175	<60	>=30	>=90	>=1.8
1461	8338	2011-2012	70498	1	99	63	Female	Non-Hispanic White	4.89	More than high school	39	113.3	mild	never	yes	130	107	DM	0	7.05	25	20	61	297.4	1.637	5.28	1.19	3.336	220987.065	92.94393419	8.169014085	0.39	<30	55246.76625	>=60	>=30	>=90	>=1.8
1462	8354	2011-2012	70514	1	100	22	Female	Non-Hispanic White	0	More than high school	33.3	111.5	never	never	no	105	53	preDM	0	6.384	21	33	56.58	386.6	1.118	3.88	0.96	2.405	110229.798	127.0720402	7.404580153	-4.48	<30	27557.4495	<60	>=30	>=90	<1.3
1463	8363	2011-2012	70523	2	94	31	Male	Non-Hispanic White	3.36	High school or equivalent	31.6	94.6	mild	now	no	119	68	no	0	5.329	22	20	73.37	362.8	1.016	4.97	1.09	3.414	202104.142	117.2460962	3.783783784	-2.1	<30	50526.0355	<60	>=30	>=90	>=1.8
1464	8365	2011-2012	70525	2	96	63	Male	Non-Hispanic Black	0.71	High school or equivalent	27.9	100.8	former	former	yes	169	86	DM	0	6.606	15	29	83.98	327.1	2.134	4.91	1.03	2.896	18345.285	98.08477829	10.06369427	-2.03	<30	4586.32125	>=60	25-30	>=90	<1.3
1465	8384	2011-2012	70544	1	99	77	Male	Non-Hispanic Black	1.34	High school or equivalent	23.3	92	never	never	yes	134	87	no	1	6.106	37	34	377.47	440.2	1.027	4.42	2.04	1.914	21616.452	14.44679904	4462.809917	-2.75	>=30	5404.113	>=60	<25	<60	1.3-1.8
1466	8385	2011-2012	70545	1	103	31	Male	Mexican American	0.51	Less than high school	23.7	85.1	moderate	never	no	113	72	no	0	5.551	20	23	79.56	416.4	0.655	4.34	1.29	2.741	73755.682	113.4085548	6.644736842	5.28	<30	18438.9205	<60	<25	>=90	<1.3
1467	8387	2011-2012	70547	1	98	39	Female	Non-Hispanic White	0.43	Less than high school	23.5	85	mild	never	no	119	70	no	0	4.829	12	17	43.32	237.9	1.152	4.09	1.66	1.914	53664.207	123.1249106	26.00732601	-3.49	<30	13416.05175	<60	<25	>=90	<1.3
1468	8388	2011-2012	70548	1	92	34	Male	Mexican American	1.48	High school or equivalent	24.5	86.2	never	never	no	114	66	preDM	0	6.328	21	28	70.72	362.8	0.677	5.02	2.15	2.56	100866.152	116.5513339	16.14035088	-2.2	<30	25216.538	<60	<25	>=90	1.3-1.8
1469	8390	2011-2012	70550	1	92	76	Male	Non-Hispanic Black	5	More than high school	29.1	103	mild	former	yes	137	65	no	0	5.329	18	25	73.37	202.2	0.711	4.19	1.4	2.457	34302.44	98.80594256	11.09243697	-2.45	<30	8575.61	>=60	25-30	>=90	>=1.8
1470	8401	2011-2012	70561	1	99	42	Male	Non-Hispanic Black	4.21	More than high school	24.7	84.8	mild	never	no	128	82	preDM	0	6.883	17	25	90.17	273.6	0.847	4.81	1.24	3.181	64856.843	104.3128059	7.024793388	-0.04	<30	16214.21075	<60	<25	>=90	>=1.8
1471	8405	2011-2012	70565	1	92	76	Female	Other Race	3.58	More than high school	25.6	92.6	mild	former	yes	133	71	no	0	5.884	14	23	81.33	333.1	2.823	6.54	1.45	3.801	38210.675	60.67494968	6.875	-3.58	<30	9552.66875	>=60	25-30	60-90	>=1.8
1472	8406	2011-2012	70566	2	95	31	Female	Non-Hispanic Black	0.26	High school or equivalent	29.4	87.2	mild	never	no	100	64	no	0	5.051	11	15	60.11	237.9	0.644	4.63	1.94	2.405	75301.614	134.7958788	4.72027972	-0.31	<30	18825.4035	<60	25-30	>=90	<1.3
1473	8413	2011-2012	70573	3	92	24	Male	Mexican American	2.78	High school or equivalent	34	110.3	heavy	never	yes	120	58	no	0	5.162	23	21	74.26	386.6	1.073	3.28	1.11	1.681	120224.03	122.5507466	4.046242775	0.75	<30	30056.0075	<60	>=30	>=90	>=1.8
1474	8415	2011-2012	70575	1	97	69	Female	Non-Hispanic White	4.92	More than high school	24.9	85.1	mild	never	no	118	65	no	0	5.829	17	20	74.26	350.9	1.795	5.79	1.09	3.879	317565.207	71.14272758	9.78021978	-1.22	<30	79391.30175	>=60	<25	60-90	>=1.8
1475	8420	2011-2012	70580	1	90	58	Male	Non-Hispanic Black	2.12	High school or equivalent	25.2	95.8	heavy	now	yes	119	69	preDM	0	6.439	27	30	99.89	463.9	3.037	4.84	1.24	2.198	55194.121	82.36664432	3.017241379	2.07	<30	13798.53025	<60	25-30	60-90	>=1.8
1476	8430	2011-2012	70590	1	90	51	Female	Other Race	5	High school or equivalent	31.9	98.9	heavy	former	no	138	86	DM	0	4.774	24	42	53.92	297.4	0.7	6.39	3.23	2.845	66518.453	105.3023116	9.661016949	-3.81	<30	16629.61325	<60	>=30	>=90	>=1.8
1477	8433	2011-2012	70593	1	99	80	Male	Non-Hispanic Black	1.84	High school or equivalent	26.9	100.5	moderate	former	yes	159	71	no	0	5.44	17	24	75.14	303.3	0.926	4.47	1.37	2.689	18405.967	95.13273376	17.73195876	-1.41	<30	4601.49175	>=60	25-30	>=90	>=1.8
1478	8436	2011-2012	70596	1	91	33	Female	Non-Hispanic White	5	More than high school	23.9	85.7	mild	former	no	104	76	no	0	5.051	21	17	60.11	220.1	1.863	5.15	0.93	3.362	194795.248	115.3000552	6.885245902	5.46	<30	48698.812	<60	<25	>=90	>=1.8
1479	8439	2011-2012	70599	2	101	54	Male	Non-Hispanic White	2.04	More than high school	25.5	97.5	mild	now	yes	143	69	DM	0	7.216	51	49	64.53	279.6	1.298	4.42	1.4	2.431	69049.231	105.1590145	23.25	4.44	<30	17262.30775	<60	25-30	>=90	>=1.8
1480	8445	2011-2012	70605	1	96	56	Male	Non-Hispanic Black	5	More than high school	27.3	97.8	mild	former	yes	140	65	no	0	5.051	23	20	91.94	345	0.621	4.65	2.15	2.224	58727.522	92.34883197	6.756756757	-0.8	<30	14681.8805	<60	25-30	>=90	>=1.8
1481	8466	2011-2012	70626	2	97	33	Male	Non-Hispanic White	0.84	High school or equivalent	29.3	105.7	heavy	now	no	117	82	no	0	5.44	36	24	80.44	333.1	2.348	6.65	1.09	4.474	30807.102	110.3424096	3.1	1.95	<30	7701.7755	<60	25-30	>=90	<1.3
1482	8467	2011-2012	70627	1	99	52	Female	Non-Hispanic Black	4.05	More than high school	24.3	84.1	never	never	no	132	82	preDM	0	4.829	13	15	68.95	249.8	1.264	6.26	1.86	3.827	43944.701	101.0764931	9.194630872	-3.3	<30	10986.17525	<60	<25	>=90	>=1.8
1483	8473	2011-2012	70633	2	98	56	Male	Non-Hispanic White	5	More than high school	36.7	128.9	heavy	never	yes	122	71	DM	0	7.882	44	36	62.76	416.4	3.793	4.86	1.06	2.069	271860.133	104.8826178	6.164383562	-1.48	<30	67965.03325	<60	>=30	>=90	>=1.8
1484	8479	2011-2012	70639	3	91	34	Female	Mexican American	1.42	Less than high school	32.5	109.4	never	never	no	NA	NA	preDM	1	5.107	27	27	39.78	226	1.705	6.59	1.4	4.422	106691.08	131.1496932	45.75342466	0.57	>=30	26672.77	<60	>=30	>=90	1.3-1.8
1485	8484	2011-2012	70644	1	101	41	Male	Non-Hispanic White	2.6	More than high school	28.7	97.4	mild	never	no	132	80	preDM	0	6.162	20	19	84.86	398.5	2.992	5.82	0.88	3.569	254707.175	97.780347	3.138686131	-3.06	<30	63676.79375	<60	25-30	>=90	>=1.8
1486	8489	2011-2012	70649	2	98	63	Male	Other Race	4.56	More than high school	33.3	112.2	heavy	never	yes	106	70	DM	0	6.051	28	21	101.66	404.5	0.745	3.62	1.29	1.991	19325.418	67.34684774	11.42857143	-3.53	<30	4831.3545	>=60	>=30	60-90	>=1.8
1487	8493	2011-2012	70653	3	91	43	Male	Non-Hispanic White	5	More than high school	31	109.7	former	never	no	115	82	preDM	0	6.217	24	18	78.68	291.5	1.637	3.65	0.96	1.94	303048.659	104.7203721	8.064516129	3.49	<30	75762.16475	<60	>=30	>=90	>=1.8
1488	8501	2011-2012	70661	2	102	65	Female	Other Race	5	More than high school	22.5	78.2	heavy	now	yes	147	67	preDM	1	5.384	33	29	54.81	297.4	1.298	5.56	1.4	3.569	45044.386	94.93012082	35.86956522	0.61	>=30	11261.0965	>=60	<25	>=90	>=1.8
1489	8504	2011-2012	70664	1	92	70	Female	Non-Hispanic White	1.16	High school or equivalent	33.1	106.8	mild	former	yes	152	40	DM	0	13.544	30	18	46.85	315.2	1.434	3.67	0.98	2.043	79264.557	96.50734786	6.551724138	-1.25	<30	19816.13925	>=60	>=30	>=90	<1.3
1490	8510	2011-2012	70670	1	90	56	Female	Other Race	2.44	Less than high school	34.1	108.8	mild	never	yes	153	78	DM	0	9.548	17	15	40.66	285.5	1.4	5.48	1.32	3.517	43468.814	111.5604703	25.23809524	-1.77	<30	10867.2035	<60	>=30	>=90	>=1.8
1491	8515	2011-2012	70675	1	92	65	Male	Other Race	5	More than high school	29.5	102.3	mild	former	no	139	73	no	0	5.273	27	21	65.42	321.2	1.874	4.63	0.98	2.793	22030.714	96.79651007	3.247863248	1.64	<30	5507.6785	>=60	25-30	>=90	>=1.8
1492	8516	2011-2012	70676	2	94	75	Female	Non-Hispanic White	4.69	More than high school	23	93.8	moderate	now	yes	130	69	no	1	5.384	37	49	87.52	368.8	1.219	4.78	1.24	2.974	91302.625	55.91865403	25.75757576	4.97	<30	22825.65625	>=60	<25	<60	>=1.8
1493	8518	2011-2012	70678	2	93	21	Male	Other Race	1.48	More than high school	26.4	89.1	moderate	former	no	111	61	no	0	5.218	14	25	76.91	309.3	1.05	3.8	1.55	1.758	78635.8	123.3685867	4.142011834	-2.56	<30	19658.95	<60	25-30	>=90	1.3-1.8
1494	8522	2011-2012	70682	1	100	22	Female	Non-Hispanic Black	2.59	More than high school	30.3	100.8	heavy	never	no	114	62	no	0	5.495	12	16	61	261.7	1.219	4.29	1.09	2.638	52815.925	142.9050115	8.08988764	-0.16	<30	13203.98125	<60	>=30	>=90	>=1.8
1495	8526	2011-2012	70686	1	100	48	Female	Non-Hispanic Black	5	More than high school	45.5	114.9	former	never	yes	125	90	no	0	5.051	9	16	61.88	362.8	0.587	4.6	1.68	2.664	61246.988	118.487358	3.513513514	11.64	<30	15311.747	<60	>=30	>=90	>=1.8
1496	8550	2011-2012	70710	1	101	57	Female	Other Race	1.07	More than high school	31.7	99.5	moderate	never	no	86	54	no	0	5.662	16	20	66.3	273.6	1.197	5.56	1.27	3.75	64741.07	88.76548274	3.586206897	0.1	<30	16185.2675	<60	>=30	60-90	<1.3
1497	8558	2011-2012	70718	1	94	75	Male	Non-Hispanic White	1.43	More than high school	30.2	111.2	former	former	no	112	61	DM	1	6.384	16	25	103.43	529.4	0.982	4.09	0.93	2.715	29349.622	60.62548652	49.27536232	2.29	>=30	7337.4055	>=60	>=30	60-90	1.3-1.8
1498	8561	2011-2012	70721	2	93	79	Female	Other Race	3.64	Less than high school	35	107.5	never	never	yes	148	81	DM	0	8.882	15	15	76.02	273.6	1.795	5.02	1.53	2.664	49393.337	64.45669391	10.859375	-1.52	<30	12348.33425	>=60	>=30	60-90	>=1.8
1499	8565	2011-2012	70725	2	93	60	Female	Non-Hispanic Black	3.93	More than high school	40.5	101	former	never	yes	138	83	preDM	1	6.162	10	15	63.65	333.1	0.61	5.28	1.76	3.233	41980.905	105.2619812	44.41860465	-1.99	>=30	10495.22625	>=60	>=30	>=90	>=1.8
1500	8567	2011-2012	70727	2	99	44	Female	Non-Hispanic Black	4.34	More than high school	36	105.5	heavy	never	no	115	74	no	0	5.495	29	21	57.46	392.6	0.824	5.25	1.81	3.051	42282.483	124.8716305	6.160714286	8.95	<30	10570.62075	<60	>=30	>=90	>=1.8
1501	8577	2011-2012	70737	2	93	28	Male	Other Race	0.22	More than high school	28.4	89.7	heavy	now	no	125	68	no	0	5.051	16	18	72.49	237.9	2.032	5.4	1.32	3.155	81961.834	120.3411753	4.262295082	4.23	<30	20490.4585	<60	25-30	>=90	<1.3
1502	8588	2011-2012	70748	1	95	32	Female	Non-Hispanic White	1.66	More than high school	23.9	84	heavy	now	no	128	86	no	0	5.107	15	22	69.84	315.2	3.252	3.57	0.91	1.164	71323.082	99.36440149	5	-1.99	<30	17830.7705	<60	<25	>=90	1.3-1.8
1503	8591	2011-2012	70751	1	100	27	Male	Mexican American	0.9	High school or equivalent	25.9	87.4	mild	never	no	99	62	no	0	5.662	11	25	72.49	309.3	1.558	5.04	1.14	3.181	74165.592	121.1895018	8.571428571	-1.68	<30	18541.398	<60	25-30	>=90	<1.3
1504	8593	2011-2012	70753	1	90	30	Male	Mexican American	1.11	Less than high school	33.2	117	heavy	never	no	129	82	DM	1	7.383	171	81	64.53	350.9	1.773	6.1	1.09	4.215	78777.517	124.4699581	153.8461538	-0.54	>=30	19694.37925	<60	>=30	>=90	<1.3
1505	8595	2011-2012	70755	1	92	56	Male	Non-Hispanic White	3.4	More than high school	23.7	100.8	heavy	now	yes	161	88	no	0	5.662	23	29	61.88	279.6	1.581	4.53	1.34	2.457	299777.807	105.4958572	5.360824742	3.6	<30	74944.45175	<60	<25	>=90	>=1.8
1506	8614	2011-2012	70774	2	90	49	Female	Non-Hispanic Black	0.95	High school or equivalent	32.9	114.4	moderate	never	no	99	59	preDM	0	6.772	12	12	65.42	327.1	1.14	4.45	0.88	3.051	44519.346	110.0129082	4.057971014	0.97	<30	11129.8365	<60	>=30	>=90	<1.3
1507	8616	2011-2012	70776	2	102	60	Male	Other Race	3.82	Less than high school	18.6	71	mild	now	no	124	61	no	0	5.44	24	24	70.72	315.2	1.005	5.46	2.07	2.922	24202.502	97.09518848	7.333333333	6.46	<30	6050.6255	>=60	<25	>=90	>=1.8
1508	8625	2011-2012	70785	1	102	41	Female	Non-Hispanic Black	0	More than high school	57.1	155	mild	never	yes	135	83	DM	0	8.16	40	50	58.34	327.1	0.881	3.23	1.22	1.603	38887.6	126.8920976	6.640625	-2.86	<30	9721.9	<60	>=30	>=90	<1.3
1509	8628	2011-2012	70788	3	91	34	Male	Other Race	2.5	More than high school	23.6	84.5	mild	former	no	107	67	no	0	5.662	14	23	83.1	434.2	1.682	4.89	1.24	2.87	24298.284	105.3564626	6.41025641	-1.61	<30	6074.571	<60	<25	>=90	>=1.8
1510	8644	2011-2012	70804	2	99	53	Female	Non-Hispanic Black	4.9	More than high school	30.1	101.4	mild	never	no	104	68	no	0	5.218	20	13	74.26	374.7	1.039	4.91	1.34	3.103	27315.086	91.76733758	3.711340206	0.59	<30	6828.7715	<60	>=30	>=90	>=1.8
1511	8646	2011-2012	70806	1	95	42	Female	Non-Hispanic White	3.24	More than high school	27	96.1	moderate	now	yes	117	84	no	0	5.218	37	34	49.5	208.2	1.039	5.22	1.4	3.362	292972.47	115.3756932	10	-4.71	<30	73243.1175	<60	25-30	>=90	>=1.8
1512	8647	2011-2012	70807	2	102	22	Female	Mexican American	3.25	More than high school	29	91.6	never	never	no	95	63	no	0	5.107	17	19	57.46	333.1	0.858	3.59	1.29	1.914	108965.466	126.4255116	2.155172414	-1.71	<30	27241.3665	<60	25-30	>=90	>=1.8
1513	8652	2011-2012	70812	1	92	25	Male	Non-Hispanic Black	4.96	More than high school	33.6	114.5	mild	never	yes	150	91	no	1	5.662	21	20	51.27	291.5	1.287	3.75	1.24	1.914	75484.411	163.8111966	1016.666667	-2.4	>=30	18871.10275	<60	>=30	>=90	>=1.8
1514	8665	2011-2012	70825	1	93	47	Male	Non-Hispanic White	5	More than high school	25.8	92.4	mild	never	no	119	80	preDM	0	6.162	38	39	106.08	386.6	0.903	4.78	1.01	3.362	280207.448	71.57854389	1.8	5.76	<30	70051.862	<60	25-30	60-90	>=1.8
1515	8672	2011-2012	70832	1	99	31	Female	Non-Hispanic White	0.89	More than high school	23.2	87.8	mild	former	no	110	69	no	0	4.607	18	22	60.11	190.3	0.429	3.67	1.58	1.888	122757.247	116.9313647	6.904761905	-1.06	<30	30689.31175	<60	<25	>=90	<1.3
1516	8673	2011-2012	70833	1	100	35	Female	Non-Hispanic Black	1.05	More than high school	25.5	85.3	mild	now	no	121	78	preDM	0	6.217	29	23	81.33	297.4	1.027	4.81	1.58	2.767	89653.064	93.29015883	3.08411215	1.15	<30	22413.266	<60	25-30	>=90	<1.3
1517	8677	2011-2012	70837	2	96	60	Male	Mexican American	0.89	Less than high school	29.8	101.8	former	now	no	110	68	preDM	0	6.606	25	22	83.1	386.6	1.355	5.33	1.01	3.698	18258.99	87.76909924	3.427230047	4.25	<30	4564.7475	>=60	25-30	60-90	<1.3
1518	8703	2011-2012	70863	1	93	77	Female	Other Race	0.87	More than high school	24.3	80	never	never	yes	135	57	preDM	1	5.94	13	20	48.62	243.9	0.96	5.04	1.58	3.026	27838.019	90.76377626	49.62962963	-1.35	>=30	6959.50475	>=60	<25	>=90	<1.3
1519	8708	2011-2012	70868	1	95	46	Male	Non-Hispanic White	1.21	Less than high school	21.1	80	former	now	yes	111	57	no	0	5.773	10	19	67.18	350.9	0.711	4.09	1.42	2.327	73830.224	109.4117157	4	-4.54	<30	18457.556	<60	<25	>=90	<1.3
1520	8730	2011-2012	70890	1	96	59	Female	Non-Hispanic Black	3.21	More than high school	33.5	98.8	mild	never	yes	109	64	preDM	0	5.44	18	22	68.95	345	1.411	5.22	1.66	2.922	36306.074	96.2265477	4.52991453	-3.29	<30	9076.5185	<60	>=30	>=90	>=1.8
1521	8734	2011-2012	70894	2	94	70	Male	Non-Hispanic White	3.4	Less than high school	36.1	120.8	mild	never	yes	122	61	DM	1	6.717	26	25	124.64	333.1	1.558	2.95	1.14	1.086	110177.225	50.11177592	4.561403509	-4.86	<30	27544.30625	>=60	>=30	<60	>=1.8
1522	8740	2011-2012	70900	2	99	59	Male	Non-Hispanic Black	0.19	Less than high school	50.9	141.2	heavy	former	yes	132	NA	DM	1	6.273	35	31	106.08	422.3	0.779	4.11	1.58	2.172	37238.415	76.05755026	359.0909091	6.61	>=30	9309.60375	<60	>=30	60-90	<1.3
1523	8746	2011-2012	70906	1	101	39	Male	Non-Hispanic White	3.9	Less than high school	33.8	123.5	moderate	never	yes	116	77	preDM	0	6.772	39	20	91.05	547.2	1.874	4.42	1.19	2.379	192256.526	91.07491891	4.763513514	2.43	<30	48064.1315	<60	>=30	>=90	>=1.8
1524	8748	2011-2012	70908	2	92	25	Male	Non-Hispanic White	3.67	More than high school	22.4	83.3	heavy	never	no	93	46	no	0	4.441	15	22	80.44	345	0.982	3.98	1.5	2.043	187475.48	116.7208592	9.389671362	1.22	<30	46868.87	<60	<25	>=90	>=1.8
1525	8752	2011-2012	70912	2	93	67	Male	Other Race	5	More than high school	38.1	140.1	moderate	former	yes	140	96	preDM	0	5.607	17	19	106.96	350.9	1.648	3.57	1.16	1.655	14161.014	61.57585389	11.56756757	5.23	<30	3540.2535	>=60	>=30	60-90	>=1.8
1526	8754	2011-2012	70914	2	92	40	Male	Non-Hispanic Black	0.02	Less than high school	17.6	68.1	heavy	now	no	125	77	preDM	1	4.829	70	229	57.46	327.1	0.621	6.13	3.13	2.715	69600.44	140.6837143	716.5109034	-3.91	>=30	17400.11	<60	<25	>=90	<1.3
1527	8756	2011-2012	70916	2	90	78	Female	Other Race	0.92	Less than high school	25.8	91.6	moderate	now	yes	163	65	DM	1	4.885	10	19	263.43	386.6	1.321	5.92	1.78	3.543	65103.756	14.44774081	531.4814815	-5.12	>=30	16275.939	>=60	25-30	<60	<1.3
1528	8760	2011-2012	70920	1	97	46	Female	Other Race	1.48	More than high school	23.8	86.7	former	never	no	110	72	preDM	0	5.384	37	28	42.43	362.8	1.061	5.43	1.66	3.284	61181.912	118.0148914	10	-2	<30	15295.478	<60	<25	>=90	1.3-1.8
1529	8769	2011-2012	70929	1	92	29	Female	Other Race	2.42	More than high school	23.2	82.8	heavy	never	no	102	51	no	0	4.718	15	15	54.81	261.7	0.756	4.22	1.34	2.534	39680.535	122.2449952	5.064102564	11.03	<30	9920.13375	<60	<25	>=90	>=1.8
1530	8773	2011-2012	70933	3	91	46	Female	Other Race	5	More than high school	29	99.3	moderate	former	no	104	70	DM	0	5.162	21	23	66.3	410.4	1.682	5.56	1.53	3.258	50853.95	95.8964181	5.148514851	-0.59	<30	12713.4875	<60	25-30	>=90	>=1.8
1531	8775	2011-2012	70935	1	99	46	Female	Non-Hispanic Black	5	More than high school	24.5	91.8	mild	never	no	114	79	no	0	5.107	22	27	73.37	226	0.982	5.12	1.63	3.051	57528.807	97.79837429	3.815028902	-0.76	<30	14382.20175	<60	<25	>=90	>=1.8
1532	8789	2011-2012	70949	1	102	68	Female	Non-Hispanic White	5	More than high school	23.8	86.3	former	former	no	129	61	no	0	5.773	15	22	57.46	243.9	1.479	5.15	1.97	2.508	268587.57	91.51665767	3.333333333	-2.25	<30	67146.8925	>=60	<25	>=90	>=1.8
1533	8790	2011-2012	70950	2	92	50	Male	Other Race	0.4	More than high school	23.5	87.2	heavy	now	no	106	53	no	0	5.495	18	16	81.33	368.8	0.948	6.49	1.24	4.81	68296.895	96.63651243	3.014354067	-3.08	<30	17074.22375	<60	<25	>=90	<1.3
1534	8799	2011-2012	70959	2	102	55	Female	Non-Hispanic White	0	More than high school	39.7	110	mild	never	yes	99	63	no	0	5.551	20	19	68.07	267.7	1.603	6	1.32	3.957	98239.336	87.20219221	3.423423423	0.24	<30	24559.834	<60	>=30	60-90	<1.3
1535	8801	2011-2012	70961	2	92	74	Female	Non-Hispanic White	5	More than high school	21.4	85.2	former	now	no	99	64	no	0	5.051	24	27	69.84	297.4	0.655	6.08	2.35	3.414	118366.638	73.97743307	16.25	8.83	<30	29591.6595	>=60	<25	60-90	>=1.8
1536	8809	2011-2012	70969	1	100	45	Male	Mexican American	1.03	High school or equivalent	27.4	93.7	heavy	now	no	137	77	preDM	0	6.328	38	38	68.95	463.9	1.727	4.53	1.11	2.612	60719.481	109.0129481	8.265306122	-0.76	<30	15179.87025	<60	25-30	>=90	<1.3
1537	8813	2011-2012	70973	1	101	39	Male	Non-Hispanic White	1.83	More than high school	22.4	84.3	heavy	never	no	121	82	DM	0	6.106	112	116	70.72	565.1	1.061	7.5	2.2	4.81	45684.972	112.528749	28.21917808	8.79	<30	11421.243	<60	<25	>=90	>=1.8
1538	8814	2011-2012	70974	1	101	49	Male	Non-Hispanic White	1.15	High school or equivalent	39.3	129.4	heavy	former	yes	105	78	no	0	5.607	36	24	91.05	499.6	1.885	3.98	1.03	2.095	62163.691	84.89679167	5.909090909	7.17	<30	15540.92275	<60	>=30	60-90	<1.3
1539	8815	2011-2012	70975	3	91	22	Female	Non-Hispanic White	1.02	More than high school	31.9	92.3	heavy	never	no	107	74	no	0	5.162	23	20	49.5	333.1	1.174	5.28	1.29	3.439	251247.062	132.7789877	8.039215686	-1.49	<30	62811.7655	<60	>=30	>=90	<1.3
1540	8820	2011-2012	70980	1	95	32	Male	Non-Hispanic White	1.28	High school or equivalent	27.4	97	mild	never	no	122	68	no	0	5.995	24	26	88.4	303.3	0.79	5.04	1.42	3.258	243928.601	99.14578562	4.533333333	6.56	<30	60982.15025	<60	25-30	>=90	<1.3
1541	8822	2011-2012	70982	2	91	44	Male	Other Race	0.76	Less than high school	28.7	102.3	heavy	never	no	121	62	no	0	5.551	29	24	83.1	345	1.05	5.43	1.29	3.646	89421.237	98.2095374	4.144736842	1.64	<30	22355.30925	<60	25-30	>=90	<1.3
1542	8827	2011-2012	70987	2	91	22	Female	Non-Hispanic White	5	More than high school	23.6	78.9	moderate	never	no	113	75	no	0	4.829	19	21	65.42	368.8	1.456	5.07	1.58	2.819	287281.201	115.3634779	4.615384615	3.85	<30	71820.30025	<60	<25	>=90	>=1.8
1543	8831	2011-2012	70991	1	93	80	Female	Non-Hispanic White	0.75	Less than high school	26.2	93.1	former	never	yes	132	31	no	1	5.551	16	26	66.3	297.4	0.982	5.64	1.37	3.827	56900.459	75.52258292	118.8235294	0.16	>=30	14225.11475	>=60	25-30	60-90	<1.3
1544	8835	2011-2012	70995	1	95	34	Female	Non-Hispanic White	1.26	Less than high school	45.5	144	heavy	now	no	119	71	DM	1	6.55	18	17	76.91	345	0.79	3.1	0.96	1.784	65053.928	87.19301495	64.16666667	2.98	>=30	16263.482	<60	>=30	60-90	<1.3
1545	8836	2011-2012	70996	1	97	41	Male	Other Race	5	More than high school	23.8	84.8	former	never	no	112	75	no	0	5.44	12	19	81.33	368.8	1.129	5.97	1.22	4.241	94911.271	102.9432823	5.259259259	-2.19	<30	23727.81775	<60	<25	>=90	>=1.8
1546	8839	2011-2012	70999	1	91	50	Female	Non-Hispanic White	3.15	More than high school	20.2	74	moderate	never	no	92	71	no	0	5.162	17	20	70.72	214.1	1.039	5.25	1.89	2.896	363141.21	86.24077546	5.12195122	1.94	<30	90785.3025	<60	<25	60-90	>=1.8
1547	8845	2011-2012	71005	1	96	64	Female	Non-Hispanic Black	3.14	High school or equivalent	36.2	99.9	former	never	no	127	46	no	0	5.44	21	23	67.18	327.1	0.565	5.25	2.02	2.974	44293.96	95.86937345	2.972972973	19.33	<30	11073.49	>=60	>=30	>=90	>=1.8
1548	8877	2011-2012	71037	1	99	52	Female	Non-Hispanic Black	5	More than high school	23.4	78	mild	never	no	104	66	no	0	5.718	13	18	72.49	273.6	0.881	6.59	2.53	3.646	43245.699	95.14623171	8.088235294	-3.99	<30	10811.42475	<60	<25	>=90	>=1.8
1549	8878	2011-2012	71038	2	90	60	Male	Other Race	0.27	Less than high school	29.1	101	heavy	now	yes	142	79	preDM	1	6.384	47	26	79.56	475.8	3.331	5.92	0.78	3.62	23217.631	92.5068776	52.58928571	1.5	>=30	5804.40775	>=60	25-30	>=90	<1.3
1550	8882	2011-2012	71042	1	102	38	Male	Other Race	0.92	Less than high school	22.3	86.7	mild	former	no	115	62	no	0	5.607	74	44	64.53	452	1.095	4.78	1.03	3.258	30396.16	117.6680432	6.103896104	1.76	<30	7599.04	<60	<25	>=90	<1.3
1551	8886	2011-2012	71046	1	91	52	Male	Non-Hispanic White	4.03	More than high school	33.8	117.9	mild	former	no	116	78	no	0	5.662	33	27	80.44	463.9	1.524	5.2	1.16	3.336	325920.989	96.55575965	6.371681416	3.81	<30	81480.24725	<60	>=30	>=90	>=1.8
1552	8899	2011-2012	71059	1	101	53	Male	Non-Hispanic White	0.96	Less than high school	29.9	113.8	heavy	former	yes	153	97	DM	0	7.216	40	32	81.33	315.2	2.145	6.88	0.67	5.224	53543.58	94.62131809	21.30434783	-3.61	<30	13385.895	<60	25-30	>=90	<1.3
1553	8900	2011-2012	71060	2	98	31	Female	Non-Hispanic White	0.19	More than high school	33.8	115.8	heavy	former	no	120	80	no	0	4.996	139	243	63.65	345	1.185	5.95	1.19	4.215	44438.847	111.9432052	10.58394161	-0.4	<30	11109.71175	<60	>=30	>=90	<1.3
1554	8901	2011-2012	71061	2	102	54	Male	Mexican American	3.24	More than high school	30.4	103.5	mild	never	no	119	79	no	0	5.44	23	24	78.68	380.7	1.852	4.63	1.01	2.767	75150.555	96.93328034	3.169014085	-2.72	<30	18787.63875	<60	>=30	>=90	>=1.8
1555	8904	2011-2012	71064	1	103	26	Female	Other Race	0.65	More than high school	44.5	138.2	heavy	now	no	104	83	preDM	0	5.94	40	27	61.88	434.2	1.264	4.78	1.22	3	24852.493	119.9617943	13.42592593	-3.43	<30	6213.12325	<60	>=30	>=90	<1.3
1556	8905	2011-2012	71065	2	101	51	Female	Non-Hispanic White	2.04	More than high school	17.5	66.4	moderate	now	yes	144	76	no	0	5.495	18	19	52.16	124.9	0.779	4.19	1.37	2.457	94265.99	106.4635905	14.18848168	1.74	<30	23566.4975	<60	<25	>=90	>=1.8
1557	8906	2011-2012	71066	1	93	71	Female	Other Race	2.66	Less than high school	20.7	84.4	former	never	no	93	42	preDM	0	5.551	12	32	49.5	243.9	1.558	5.74	1.63	3.388	47849.713	94.11146404	6.621621622	-3.43	<30	11962.42825	>=60	<25	>=90	>=1.8
1558	8909	2011-2012	71069	1	98	62	Female	Non-Hispanic White	1.75	High school or equivalent	29.9	99.4	moderate	former	yes	137	91	no	0	6.051	21	20	69.84	422.3	1.061	5.38	2.15	2.741	320446.181	80.48376342	4.239130435	-1.07	<30	80111.54525	>=60	25-30	60-90	1.3-1.8
1559	8911	2011-2012	71071	2	92	36	Female	Other Race	3.54	More than high school	28.7	89	mild	never	no	108	89	no	0	5.884	18	23	63.65	261.7	1.716	7.27	1.29	5.198	33619.586	108.0796626	6.857142857	-0.52	<30	8404.8965	<60	25-30	>=90	>=1.8
1560	8912	2011-2012	71072	1	103	50	Female	Other Race	1.57	High school or equivalent	37	105.5	heavy	former	no	101	72	DM	0	7.327	34	35	75.14	368.8	1.231	4.42	1.22	2.638	44215.12	80.14583649	5.263157895	8.54	<30	11053.78	<60	>=30	60-90	1.3-1.8
1561	8916	2011-2012	71076	1	97	63	Female	Other Race	3.93	More than high school	27.4	88.2	former	former	no	124	66	no	0	5.384	15	19	67.18	273.6	0.948	5.33	1.99	2.896	57755.123	83.75004414	8.048780488	2.1	<30	14438.78075	>=60	25-30	60-90	>=1.8
1562	8924	2011-2012	71084	3	92	55	Male	Non-Hispanic White	1.03	More than high school	27.5	103.7	mild	now	yes	125	79	preDM	0	6.384	46	31	75.14	321.2	1.502	5.28	1.37	3.207	50418.514	98.09125089	16.66666667	-5.02	<30	12604.6285	<60	25-30	>=90	<1.3
1563	8937	2011-2012	71097	2	101	21	Male	Non-Hispanic Black	0.21	More than high school	23.7	75.2	never	never	no	136	73	no	0	5.107	10	17	91.05	261.7	0.881	4.32	1.55	2.353	102547.833	119.4760379	13.28125	3.02	<30	25636.95825	<60	<25	>=90	<1.3
1564	8941	2011-2012	71101	2	95	51	Male	Non-Hispanic White	0.75	Less than high school	33.4	118	mild	now	no	121	81	no	0	5.273	50	50	86.63	458	3.127	4.81	1.14	2.25	40727.463	88.90325343	3.333333333	-3.5	<30	10181.86575	<60	>=30	60-90	<1.3
1565	8943	2011-2012	71103	1	94	57	Female	Non-Hispanic White	1.26	Less than high school	37.8	125	former	former	no	125	68	DM	0	9.381	24	24	70.72	190.3	1.118	4.42	1.37	2.534	69249.372	82.10269112	9.949748744	1.28	<30	17312.343	<60	>=30	60-90	<1.3
1566	8947	2011-2012	71107	2	94	34	Female	Non-Hispanic White	5	More than high school	22.3	79.9	heavy	former	no	109	62	no	0	4.774	23	25	86.63	255.8	0.802	3.88	1.34	2.172	143449.568	75.50368459	17.5	6.63	<30	35862.392	<60	<25	60-90	>=1.8
1567	8948	2011-2012	71108	1	98	20	Female	Non-Hispanic Black	0.04	More than high school	41	112.4	never	never	no	116	73	no	0	5.551	15	19	69.84	309.3	1.073	4.06	1.4	2.172	51389.09	124.6193366	5.427509294	-1.14	<30	12847.2725	<60	>=30	>=90	<1.3
1568	8954	2011-2012	71114	1	98	20	Female	Non-Hispanic White	0.31	More than high school	20.5	77.6	mild	never	no	90	64	no	1	5.384	17	27	68.95	273.6	1.468	6.49	1.71	4.112	335604.902	109.7813628	33.96825397	0.63	>=30	83901.2255	<60	<25	>=90	<1.3
1569	8959	2011-2012	71119	2	103	36	Male	Non-Hispanic White	5	More than high school	25.2	95.4	mild	former	yes	117	67	no	0	5.44	21	23	75.14	339	0.418	3.47	1.37	1.914	171770.268	112.0971449	3.032786885	5.12	<30	42942.567	<60	25-30	>=90	>=1.8
1570	8962	2011-2012	71122	1	91	63	Male	Non-Hispanic White	5	More than high school	26.3	104.2	mild	former	no	131	77	no	0	5.44	27	30	99.01	220.1	0.79	4.73	1.19	3.181	283794.9	69.53386537	4.625	6.31	<30	70948.725	>=60	25-30	60-90	>=1.8
1571	8973	2011-2012	71133	1	90	36	Female	Non-Hispanic White	3.13	More than high school	18.1	72.2	mild	never	no	86	65	no	0	4.496	14	22	61	202.2	1.513	4.89	1.68	2.508	206086.114	112.3547253	12.08	4.44	<30	51521.5285	<60	<25	>=90	>=1.8
1572	8976	2011-2012	71136	1	95	21	Male	Other Race	0.73	High school or equivalent	24.4	85.5	mild	never	no	115	68	no	0	5.329	32	32	78.68	356.9	0.847	4.34	1.32	2.638	26343.861	122.2215282	5.837837838	7.59	<30	6585.96525	<60	<25	>=90	<1.3
1573	8995	2011-2012	71155	2	99	41	Male	Non-Hispanic White	5	More than high school	27.1	99.4	moderate	former	no	133	84	preDM	0	5.829	61	104	118.46	434.2	1.039	6	1.37	4.163	234584.701	65.33528557	2.17791411	-0.95	<30	58646.17525	<60	25-30	60-90	>=1.8
1574	8999	2011-2012	71159	3	92	37	Female	Non-Hispanic White	5	More than high school	20.8	80.3	moderate	never	yes	120	75	no	0	4.718	22	27	58.34	356.9	0.474	6.36	2.33	3.827	219223.729	113.2118759	5	1.52	<30	54805.93225	<60	<25	>=90	>=1.8
1575	9004	2011-2012	71164	1	101	48	Male	Non-Hispanic White	3.25	More than high school	31.1	103.9	moderate	never	no	115	69	no	0	5.551	17	22	85.75	309.3	0.813	5.35	1.99	3	261574.799	91.92956553	2.834645669	-1.49	<30	65393.69975	<60	>=30	>=90	>=1.8
1576	9012	2011-2012	71172	1	100	42	Female	Non-Hispanic Black	1.05	More than high school	22.6	85.2	mild	never	no	111	61	no	0	4.607	24	24	72.49	297.4	0.463	4.37	1.42	2.741	71848.322	102.0702334	6.241134752	18.21	<30	17962.0805	<60	<25	>=90	<1.3
1577	9025	2011-2012	71185	2	96	29	Male	Mexican American	2.38	High school or equivalent	22.8	90.9	heavy	never	no	111	58	no	0	6.051	22	23	82.21	309.3	1.344	5.12	1.6	2.896	105438.324	110.5428426	3.735632184	11.15	<30	26359.581	<60	<25	>=90	>=1.8
1578	9037	2011-2012	71197	3	91	36	Male	Non-Hispanic White	1.07	More than high school	44.7	138.5	mild	never	yes	143	75	no	0	4.996	41	32	73.37	463.9	2.156	5.72	1.06	3.672	35702.214	113.1995327	4.154589372	-0.26	<30	8925.5535	<60	>=30	>=90	<1.3
1579	9044	2011-2012	71204	2	102	27	Female	Mexican American	3.25	More than high school	26.4	89	mild	never	no	94	52	no	0	4.774	46	33	58.34	321.2	0.802	5.35	1.55	3.439	108965.466	121.4505545	2.777777778	-0.34	<30	27241.3665	<60	25-30	>=90	>=1.8
1580	9046	2011-2012	71206	1	93	29	Male	Other Race	2.3	More than high school	22.2	78	mild	never	no	112	71	no	0	5.218	16	23	84.86	339	0.497	5.35	1.84	3.284	21842.149	106.3801485	3.396226415	2.95	<30	5460.53725	<60	<25	>=90	>=1.8
1581	9048	2011-2012	71208	2	94	32	Male	Non-Hispanic White	4.76	More than high school	21	75.1	mild	never	no	104	61	no	0	4.94	19	25	89.28	446.1	0.926	4.6	1.4	2.793	40998.341	97.96021227	3.6328125	1.05	<30	10249.58525	<60	<25	>=90	>=1.8
1582	9057	2011-2012	71217	1	102	28	Male	Mexican American	1.89	High school or equivalent	24.9	93.3	heavy	now	no	109	62	no	0	5.495	144	94	92.82	392.6	1.524	5.25	1.22	3.336	91597.382	96.13010172	3.673469388	-2.36	<30	22899.3455	<60	<25	>=90	>=1.8
1583	9058	2011-2012	71218	2	99	33	Male	Non-Hispanic White	5	More than high school	27.7	101.1	mild	never	no	110	67	no	0	5.551	24	23	93.7	291.5	1.197	5.33	1.24	3.543	192772.136	91.75478371	2.941176471	8.36	<30	48193.034	<60	25-30	>=90	>=1.8
1584	9062	2011-2012	71222	2	91	55	Female	Non-Hispanic White	5	More than high school	29	103.5	moderate	never	no	115	76	no	0	5.662	20	20	78.68	291.5	1.106	5.53	1.78	3.233	453168.274	73.19512751	7.580645161	3.05	<30	113292.0685	<60	25-30	60-90	>=1.8
1585	9071	2011-2012	71231	1	103	52	Male	Non-Hispanic Black	0.63	High school or equivalent	30.2	100.9	never	never	yes	120	77	no	0	4.496	26	30	97.24	345	1.423	4.27	1.45	2.172	46571.474	88.75318839	8.592964824	-3.27	<30	11642.8685	<60	>=30	60-90	<1.3
1586	9074	2011-2012	71234	1	91	47	Female	Non-Hispanic White	2.92	More than high school	30.8	99.6	former	now	yes	95	49	no	0	5.884	12	17	75.14	285.5	1.423	5.28	1.63	3	335950.143	81.85273975	5.684210526	-1.81	<30	83987.53575	<60	>=30	60-90	>=1.8
1587	9079	2011-2012	71239	1	98	48	Male	Non-Hispanic White	1.79	Less than high school	22.3	92.6	heavy	now	no	106	65	no	0	5.162	16	18	77.79	309.3	1.547	5.74	0.88	4.163	308532.342	101.5767548	6.086956522	-4.35	<30	77133.0855	<60	<25	>=90	1.3-1.8
1588	9080	2011-2012	71240	1	93	80	Male	Non-Hispanic White	0.69	More than high school	28.8	107.5	mild	former	yes	113	46	DM	1	6.217	20	36	88.4	463.9	0.79	3.98	1.37	2.25	16664.761	70.768206	30.25	-1.45	>=30	4166.19025	>=60	25-30	60-90	<1.3
1589	9082	2011-2012	71242	2	97	48	Male	Non-Hispanic White	1.45	Less than high school	23.5	97.4	former	now	yes	105	58	DM	0	4.94	15	17	99.89	202.2	2.258	4.11	0.78	2.302	39968.452	76.43467023	12.99363057	-2.64	<30	9992.113	<60	<25	60-90	1.3-1.8
1590	9084	2011-2012	71244	1	90	64	Female	Non-Hispanic White	5	More than high school	25.5	90.9	mild	never	no	112	65	no	0	5.94	19	23	75.14	255.8	1.14	4.68	1.66	2.508	263189.907	72.63909839	6.597938144	0.74	<30	65797.47675	>=60	25-30	60-90	>=1.8
1591	9089	2011-2012	71249	2	97	24	Male	Non-Hispanic Black	0.82	High school or equivalent	38.7	116	mild	now	no	116	81	no	0	5.218	26	23	65.42	339	2.585	5.33	1.01	3.129	55018.789	149.2481659	2.421052632	1.65	<30	13754.69725	<60	>=30	>=90	<1.3
1592	9090	2011-2012	71250	2	101	39	Male	Non-Hispanic White	0	Less than high school	23.6	96.6	moderate	now	no	136	82	preDM	0	5.384	19	20	66.3	315.2	0.847	5.25	1.06	3.801	53517.353	115.553551	4.901960784	-3.56	<30	13379.33825	<60	<25	>=90	<1.3
1593	9107	2011-2012	71267	1	100	41	Female	Other Race	2.62	More than high school	23.4	80.5	never	never	no	95	46	no	0	5.218	14	20	53.04	220.1	0.621	4.34	1.66	2.405	57495.235	113.5813887	8.548387097	-2.14	<30	14373.80875	<60	<25	>=90	>=1.8
1594	9111	2011-2012	71271	2	96	57	Male	Mexican American	1.12	Less than high school	18.5	78.3	mild	former	no	113	61	no	0	5.051	23	17	65.42	232	0.858	5.02	1.66	2.974	61348	102.3919258	4.757281553	1.74	<30	15337	<60	<25	>=90	<1.3
1595	9112	2011-2012	71272	2	93	30	Male	Non-Hispanic White	3.3	More than high school	25.6	80.5	former	never	no	111	70	no	0	4.718	18	23	92.82	368.8	0.7	4.01	1.19	2.508	211007.558	94.78899067	3.040935673	12.04	<30	52751.8895	<60	25-30	>=90	>=1.8
1596	9119	2011-2012	71279	1	98	40	Male	Non-Hispanic White	1.11	Less than high school	25.1	100	heavy	now	yes	138	107	no	0	5.051	36	23	80.44	356.9	3.489	5.17	0.8	2.767	53122.977	105.0478584	6.666666667	-0.2	<30	13280.74425	<60	25-30	>=90	<1.3
1597	9142	2011-2012	71302	2	93	56	Female	Non-Hispanic Black	1.29	High school or equivalent	29.1	102.1	mild	never	yes	140	82	DM	0	6.051	12	15	78.68	309.3	1.152	3.47	1.34	1.603	39225.366	83.78707242	6.666666667	-0.08	<30	9806.3415	<60	25-30	60-90	<1.3
1598	9146	2011-2012	71306	2	100	52	Female	Other Race	5	More than high school	26.4	90.8	never	never	no	125	69	preDM	0	5.218	48	44	53.04	315.2	1.558	6.65	1.29	4.629	40868.699	105.1353846	3.965517241	1.22	<30	10217.17475	<60	25-30	>=90	>=1.8
1599	9147	2011-2012	71307	2	91	58	Male	Non-Hispanic White	1.39	More than high school	32.9	112.4	mild	never	yes	108	62	no	1	5.551	26	29	135.25	374.7	1.174	4.37	1.03	2.793	273060.828	49.39270141	3.505154639	0.99	<30	68265.207	<60	>=30	<60	1.3-1.8
1600	9148	2011-2012	71308	3	91	69	Female	Other Race	1.33	Less than high school	22.9	81.5	mild	never	yes	119	62	no	0	5.384	19	25	69.84	315.2	0.756	4.5	1.68	2.483	20775.243	76.62191734	5.905511811	3.37	<30	5193.81075	>=60	<25	60-90	1.3-1.8
1601	9150	2011-2012	71310	2	96	67	Female	Non-Hispanic Black	2.04	More than high school	41.8	124.2	never	never	yes	116	71	DM	0	8.049	34	23	65.42	333.1	0.948	3.85	1.53	1.888	44631.297	96.94604993	7.413793103	1.6	<30	11157.82425	>=60	>=30	>=90	>=1.8
1602	9155	2011-2012	71315	1	98	44	Male	Non-Hispanic White	1.11	Less than high school	40.4	147.2	former	former	yes	131	84	preDM	0	5.94	45	26	85.75	392.6	1.592	5.4	1.03	3.646	238915.826	94.54927731	4.031007752	7.31	<30	59728.9565	<60	>=30	>=90	<1.3
1603	9156	2011-2012	71316	2	100	57	Male	Other Race	3.13	Less than high school	24.7	91.6	heavy	now	yes	113	65	no	0	5.995	17	22	100.78	339	1.287	3.88	1.14	2.146	221659.287	70.99168846	5.934065934	2.28	<30	55414.82175	<60	<25	60-90	>=1.8
1604	9161	2011-2012	71321	1	92	54	Female	Non-Hispanic Black	4.96	More than high school	34.5	101.7	former	never	yes	151	73	no	1	5.551	13	20	59.23	315.2	1.332	6.23	1.32	4.293	54941.972	115.2460773	48.88888889	3.88	>=30	13735.493	<60	>=30	>=90	>=1.8
1605	9164	2011-2012	71324	1	93	35	Male	Other Race	2.46	Less than high school	29.8	100.1	heavy	former	no	106	51	no	0	5.384	60	32	63.65	356.9	0.926	5.82	1.24	4.163	83532.891	120.8572826	6.666666667	-3.17	<30	20883.22275	<60	25-30	>=90	>=1.8
1606	9168	2011-2012	71328	2	93	54	Female	Other Race	1.74	More than high school	25.8	81	mild	never	no	118	78	no	0	5.329	23	22	68.07	303.3	2.021	6.23	1.37	3.931	56191.367	87.81691059	16.35514019	-1.09	<30	14047.84175	<60	25-30	60-90	1.3-1.8
1607	9176	2011-2012	71336	2	92	45	Male	Other Race	5	More than high school	21	79	mild	former	no	130	87	no	0	5.829	20	22	62.76	345	0.621	5.2	1.68	3.233	32157.338	113.308316	2.686567164	0.94	<30	8039.3345	<60	<25	>=90	>=1.8
1608	9180	2011-2012	71340	1	95	36	Female	Non-Hispanic White	1.1	Less than high school	40.8	112.4	heavy	now	yes	133	88	no	0	5.273	23	20	79.56	285.5	1.761	4.58	0.88	2.896	55032.128	82.52390575	22.91666667	-0.33	<30	13758.032	<60	>=30	60-90	<1.3
1609	9188	2011-2012	71348	2	98	56	Male	Mexican American	1.4	Less than high school	29.9	114.1	heavy	former	yes	154	89	no	0	5.607	40	27	68.95	362.8	2.055	5.3	1.03	3.336	56063.057	100.9066569	22.53968254	2.24	<30	14015.76425	<60	25-30	>=90	1.3-1.8
1610	9193	2011-2012	71353	1	95	76	Female	Non-Hispanic White	1.29	High school or equivalent	34.1	99	mild	never	yes	128	69	preDM	0	5.44	48	55	67.18	339	1.727	4.47	1.24	2.431	82804.286	76.44080906	8.260869565	-3.68	<30	20701.0715	>=60	>=30	60-90	<1.3
1611	9205	2011-2012	71365	2	92	22	Male	Other Race	1.38	More than high school	29.7	91.2	heavy	never	no	126	66	no	0	5.773	24	22	80.44	321.2	1.14	4.37	0.7	3.155	51271.049	119.2067177	7.551020408	1.2	<30	12817.76225	<60	25-30	>=90	1.3-1.8
1612	9208	2011-2012	71368	1	90	35	Male	Non-Hispanic White	3.93	Less than high school	20.6	81.5	mild	former	no	131	83	no	0	5.551	19	24	59.23	285.5	0.858	4.09	1.29	2.405	204720.272	124.4857779	4.642857143	-0.07	<30	51180.068	<60	<25	>=90	>=1.8
1613	9212	2011-2012	71372	3	92	37	Male	Mexican American	0.51	Less than high school	32.5	115.9	heavy	never	yes	146	50	preDM	0	5.884	47	34	72.49	350.9	1.129	4.34	1.34	2.483	107826.597	112.9685319	2.727272727	-2.45	<30	26956.64925	<60	>=30	>=90	<1.3
1614	9219	2011-2012	71379	2	94	60	Female	Non-Hispanic White	0.83	More than high school	27.7	96.5	mild	former	yes	152	80	no	1	5.107	15	18	91.05	368.8	1.479	7.63	1.86	5.094	54897.658	59.22713535	13.51111111	-0.85	<30	13724.4145	>=60	25-30	<60	<1.3
1615	9221	2011-2012	71381	2	90	48	Male	Other Race	4.32	More than high school	25	92.3	mild	never	no	112	69	no	0	6.051	34	30	62.76	321.2	1.761	5.33	0.93	3.595	35589.178	110.9454588	5.818181818	0.18	<30	8897.2945	<60	25-30	>=90	>=1.8
1616	9233	2011-2012	71393	1	91	27	Male	Non-Hispanic White	3.58	High school or equivalent	25.7	86.4	mild	never	no	116	61	no	0	5.273	19	19	100.78	285.5	0.531	3.21	1.58	1.396	235747.936	87.64558632	4.195804196	-3.84	<30	58936.984	<60	25-30	60-90	>=1.8
1617	9253	2011-2012	71413	2	100	40	Male	Other Race	0.76	More than high school	28.7	98.6	heavy	former	no	118	63	preDM	0	5.662	28	21	83.1	333.1	2.043	5.97	1.24	3.801	56069.241	101.0082092	2.878787879	2.23	<30	14017.31025	<60	25-30	>=90	<1.3
1618	9257	2011-2012	71417	2	102	64	Male	Non-Hispanic Black	2.04	High school or equivalent	41.2	129	mild	never	yes	109	75	preDM	0	5.773	19	16	77.79	535.3	0.677	4.4	1.68	2.405	31042.421	104.9423539	7.435897436	-1.87	<30	7760.60525	>=60	>=30	>=90	>=1.8
1619	9262	2011-2012	71422	1	101	37	Female	Non-Hispanic White	4.21	More than high school	23.1	83.3	moderate	never	no	105	76	no	0	4.885	35	25	57.46	267.7	0.508	3.88	1.86	1.784	182443.224	113.7819696	3.23943662	4.58	<30	45610.806	<60	<25	>=90	>=1.8
1620	9270	2011-2012	71430	2	90	65	Female	Non-Hispanic Black	1.61	High school or equivalent	29.5	94.2	former	never	yes	187	73	no	1	5.162	11	19	91.05	333.1	0.463	6.78	2.46	4.112	40470.766	65.91929682	146.8085106	-3.88	>=30	10117.6915	>=60	25-30	60-90	1.3-1.8
1621	9295	2011-2012	71455	1	94	70	Male	Non-Hispanic White	1.16	High school or equivalent	24.4	99	mild	never	yes	134	75	no	0	4.94	18	24	58.34	261.7	1.581	5.43	1.27	3.439	35569.965	97.95522831	4.581497797	-0.89	<30	8892.49125	>=60	<25	>=90	<1.3
1622	9300	2011-2012	71460	1	96	47	Female	Non-Hispanic Black	5	More than high school	28.3	89.9	moderate	former	no	124	81	no	0	5.607	16	17	65.42	267.7	0.598	4.16	1.47	2.405	45363.108	111.5694131	3.190184049	-0.23	<30	11340.777	<60	25-30	>=90	>=1.8
1623	9307	2011-2012	71467	2	101	48	Male	Non-Hispanic White	2.81	High school or equivalent	24.9	92.2	moderate	now	no	126	80	no	0	5.329	20	22	76.02	309.3	1.671	4.84	1.09	2.974	332561.428	102.5410708	2.985074627	0.38	<30	83140.357	<60	<25	>=90	>=1.8
1624	9310	2011-2012	71470	1	98	80	Female	Non-Hispanic White	3.48	Less than high school	31.4	105	never	never	yes	144	86	no	1	5.718	19	25	100.78	440.2	1.558	4.47	1.34	2.405	130720.636	45.52269206	10	2.73	<30	32680.159	>=60	>=30	<60	>=1.8
1625	9312	2011-2012	71472	2	97	32	Male	Non-Hispanic Black	0.33	High school or equivalent	22.7	75.2	moderate	now	no	125	83	no	0	4.996	14	27	79.56	309.3	0.35	2.69	1.45	1.086	62462.033	130.185782	4.827586207	-1.57	<30	15615.50825	<60	<25	>=90	<1.3
1626	9313	2011-2012	71473	2	98	38	Female	Non-Hispanic Black	4.76	More than high school	29.5	100.4	moderate	never	no	127	87	DM	0	7.827	24	25	56.58	291.5	1.14	5.9	1.6	3.776	80099.105	130.9132409	8.783783784	-3.11	<30	20024.77625	<60	25-30	>=90	>=1.8
1627	9314	2011-2012	71474	2	95	25	Male	Non-Hispanic Black	0.42	High school or equivalent	38	127	mild	never	no	122	78	DM	0	5.218	41	33	114.92	505.6	0.869	5.64	1.09	4.163	39206.608	87.66787864	4.01826484	2.48	<30	9801.652	<60	>=30	60-90	<1.3
1628	9316	2011-2012	71476	1	97	49	Female	Non-Hispanic White	2.51	More than high school	30.9	111	heavy	former	yes	125	81	no	0	5.384	23	23	62.76	327.1	1.648	8.4	1.6	6.051	87645.831	100.3293169	28.23529412	0	<30	21911.45775	<60	>=30	>=90	>=1.8
1629	9318	2011-2012	71478	2	98	43	Male	Mexican American	1.53	Less than high school	29.3	103.3	moderate	now	no	116	80	no	0	5.773	163	97	99.01	321.2	1.016	4.58	1.32	2.793	68790.345	80.02236868	5.423728814	-1.68	<30	17197.58625	<60	25-30	60-90	1.3-1.8
1630	9337	2011-2012	71497	1	94	71	Female	Non-Hispanic White	0.55	More than high school	29.3	107.2	former	former	yes	125	55	no	1	4.885	16	22	74.26	303.3	0.881	5.02	1.4	3.207	56183.023	70.15021538	167.7419355	-7.13	>=30	14045.75575	>=60	25-30	60-90	<1.3
1631	9362	2011-2012	71522	1	95	63	Female	Non-Hispanic White	1.1	More than high school	32.8	109.5	mild	now	yes	137	66	DM	1	11.546	15	18	112.27	410.4	2.608	7.21	0.96	5.069	83281.158	45.01839206	5.438596491	-2.83	<30	20820.2895	>=60	>=30	<60	<1.3
1632	9367	2011-2012	71527	1	91	54	Female	Non-Hispanic White	0.86	More than high school	37.1	114	mild	former	yes	128	66	DM	1	7.105	18	16	71.6	226	1.569	4.86	1.09	3.051	63524.75	82.60133252	30	3.66	>=30	15881.1875	<60	>=30	60-90	<1.3
1633	9369	2011-2012	71529	2	96	33	Male	Non-Hispanic Black	4.76	More than high school	27.6	92.1	mild	never	no	101	71	no	0	4.774	21	29	110.5	374.7	0.666	4.73	1.37	3.051	91669.413	86.90160407	1.755102041	4.72	<30	22917.35325	<60	25-30	60-90	>=1.8
1634	9382	2011-2012	71542	2	94	67	Female	Non-Hispanic White	5	More than high school	33.7	125	mild	former	yes	140	65	DM	1	7.216	18	23	105.2	356.9	1.208	3.05	1.14	1.371	198709.354	47.35320682	5.061728395	-1.4	<30	49677.3385	>=60	>=30	<60	>=1.8
1635	9399	2011-2012	71559	2	90	51	Female	Other Race	0.3	Less than high school	28.9	101.1	never	never	no	135	55	DM	0	7.272	17	20	51.27	333.1	1.231	3.18	1.37	1.241	39723.12	107.0640359	2.823529412	-4.1	<30	9930.78	<60	25-30	>=90	<1.3
1636	9401	2011-2012	71561	1	102	40	Female	Other Race	5	More than high school	23	83.5	mild	former	no	109	74	no	0	4.885	18	20	56.58	267.7	0.858	5.17	1.81	2.974	36416.37	111.9789718	7.321428571	2.21	<30	9104.0925	<60	<25	>=90	>=1.8
1637	9411	2011-2012	71571	2	101	60	Male	Non-Hispanic Black	5	High school or equivalent	39.8	130.2	moderate	never	no	135	85	preDM	1	6.384	21	23	103.43	523.4	0.892	5.9	1.34	4.138	27935.239	77.87265847	44.95145631	-1.99	>=30	6983.80975	>=60	>=30	60-90	>=1.8
1638	9418	2011-2012	71578	1	101	41	Male	Non-Hispanic White	1.85	High school or equivalent	30.6	95.6	mild	former	no	136	82	no	0	5.273	43	32	81.33	398.5	0.768	4.91	1.32	3.233	307157.002	102.9432823	2.727272727	-2.59	<30	76789.2505	<60	>=30	>=90	>=1.8
1639	9422	2011-2012	71582	1	97	29	Male	Mexican American	0.72	High school or equivalent	32.4	99.7	former	never	no	126	79	no	0	5.44	30	20	74.26	416.4	1.66	6.15	1.14	4.267	85112.06	118.3211014	2.6	2.95	<30	21278.015	<60	>=30	>=90	<1.3
1640	9424	2011-2012	71584	1	100	58	Female	Non-Hispanic Black	5	More than high school	35.9	104	never	never	yes	162	74	no	0	5.662	17	20	74.26	303.3	0.474	4.58	1.94	2.431	46311.949	88.6001331	10.55793991	-3.54	<30	11577.98725	<60	>=30	60-90	>=1.8
1641	9445	2011-2012	71605	2	94	38	Female	Non-Hispanic White	1.84	More than high school	26.4	86.2	mild	never	no	107	77	no	0	4.718	22	23	92.82	327.1	1.626	4.45	1.22	2.483	127027.253	67.53666369	3.370786517	1.26	<30	31756.81325	<60	25-30	60-90	>=1.8
1642	9474	2011-2012	71634	2	103	21	Female	Other Race	1.2	More than high school	21.6	80.7	moderate	now	no	104	60	no	1	4.996	11	14	69.84	232	0.621	4.22	1.4	2.534	82332.876	107.3467962	31.19047619	-4.25	>=30	20583.219	<60	<25	>=90	<1.3
1643	9480	2011-2012	71640	1	99	51	Female	Non-Hispanic Black	5	More than high school	31	98.3	mild	never	no	116	61	no	0	4.774	22	21	76.02	237.9	0.723	3.7	1.53	1.836	36676.963	90.45543451	1.666666667	2.03	<30	9169.24075	<60	>=30	>=90	>=1.8
[truncated: 5,231 more rows]
